# Supplementary material for: A transcriptomic taxonomy of Drosophila circadian neurons around the clock
Source: eLife. 2021 Jan 13;10:e63056. doi: 10.7554/eLife.63056 (PMC7837698; doi:10.7554/eLife.63056)
Supplement: Source data 1. — Table displaying the average log-fold change values, percentage of expression and p-value for the list of differentially expressed genes among clusters. [file elife-63056-data1.xlsx]

## Sheet: Table_S1_marker_genes_in_identi
p_val	avg_logFC	pct.1	pct.2	p_val_adj	cluster	gene
0	2.32922	0.974	0.442	0	1:DN1p_CNMa	pdm3
2.32e-250	2.28647	1	0.908	3.69e-246	1:DN1p_CNMa	AstC
3.26e-162	1.54306	0.966	0.508	5.18e-158	1:DN1p_CNMa	CG43689
5.02e-152	1.269	0.747	0.209	7.98e-148	1:DN1p_CNMa	Nos
2.37e-116	1.38638	0.868	0.611	3.76e-112	1:DN1p_CNMa	CG13298
6.5e-112	0.846056	0.442	0.063	1.03e-107	1:DN1p_CNMa	CG32082
1.94e-104	-1.23011	0.539	0.839	3.08e-100	1:DN1p_CNMa	dpr9
1.2e-97	-1.83115	0.926	0.942	1.9e-93	1:DN1p_CNMa	Pdf
5.99e-94	0.795273	0.382	0.053	9.52e-90	1:DN1p_CNMa	inaC
1.23e-93	0.512738	0.345	0.026	1.95e-89	1:DN1p_CNMa	CG2121
3.2e-84	-0.980874	0.745	0.919	5.08e-80	1:DN1p_CNMa	CG13954
1.82e-78	1.05662	0.611	0.29	2.9e-74	1:DN1p_CNMa	CG5071
9.42e-78	1.06045	0.784	0.431	1.5e-73	1:DN1p_CNMa	CG9932
2.43e-76	-1.20876	0.416	0.708	3.86e-72	1:DN1p_CNMa	PVRAP
7.72e-75	0.981604	0.558	0.159	1.23e-70	1:DN1p_CNMa	Xport-B
1.43e-74	1.04641	0.671	0.162	2.27e-70	1:DN1p_CNMa	Lac
9.31e-74	-1.00243	0.421	0.715	1.48e-69	1:DN1p_CNMa	beat-IV
1.38e-73	1.3978	0.963	0.806	2.19e-69	1:DN1p_CNMa	CNMa
4.31e-71	1.08786	0.837	0.481	6.86e-67	1:DN1p_CNMa	Pu
2.78e-69	-0.881725	0.895	0.971	4.42e-65	1:DN1p_CNMa	CG31221
3.02e-69	1.0059	0.642	0.281	4.8e-65	1:DN1p_CNMa	Rgk3
3.79e-69	0.536371	0.284	0.019	6.02e-65	1:DN1p_CNMa	whip
1.76e-68	1.47321	0.984	0.745	2.8e-64	1:DN1p_CNMa	Dh31
1.33e-67	0.705445	0.6	0.284	2.11e-63	1:DN1p_CNMa	D19A
1.12e-66	-1.18776	0.5	0.694	1.79e-62	1:DN1p_CNMa	toy
2.03e-66	-0.995979	0.271	0.63	3.23e-62	1:DN1p_CNMa	sca
3e-66	0.502248	0.366	0.053	4.76e-62	1:DN1p_CNMa	AdoR
9.75e-65	-1.26208	0.921	0.938	1.55e-60	1:DN1p_CNMa	pros
7.87e-64	-0.970239	0.353	0.663	1.25e-59	1:DN1p_CNMa	Eip63F-1
8.96e-64	0.807531	0.55	0.159	1.42e-59	1:DN1p_CNMa	gogo
1.32e-63	1.01152	0.7	0.312	2.1e-59	1:DN1p_CNMa	CG34347
1.81e-62	0.667673	0.245	0.038	2.87e-58	1:DN1p_CNMa	CG18449
5e-62	0.437791	0.25	0.014	7.95e-58	1:DN1p_CNMa	cola
9.09e-62	-1.01839	0.647	0.799	1.44e-57	1:DN1p_CNMa	Bx
1.19e-60	-2.14912	0.526	0.559	1.89e-56	1:DN1p_CNMa	Trissin
6.65e-60	-0.965002	0.418	0.677	1.06e-55	1:DN1p_CNMa	mGluR
1.24e-59	-1.14278	0.595	0.719	1.97e-55	1:DN1p_CNMa	CG17777
3.88e-59	1.04517	1	0.886	6.16e-55	1:DN1p_CNMa	VGlut
4.59e-59	0.747028	1	0.999	7.29e-55	1:DN1p_CNMa	CG2269
1.59e-57	-0.888391	0.976	0.985	2.52e-53	1:DN1p_CNMa	chrb
6.62e-57	-0.877242	0.476	0.744	1.05e-52	1:DN1p_CNMa	wry
7.38e-56	0.800215	0.939	0.759	1.17e-51	1:DN1p_CNMa	CG44422
9.45e-56	-1.77712	0.771	0.78	1.5e-51	1:DN1p_CNMa	ITP
1.71e-55	0.799566	0.766	0.464	2.71e-51	1:DN1p_CNMa	CG31637
9.47e-55	-1.0704	0.418	0.648	1.51e-50	1:DN1p_CNMa	CR44320
2.22e-53	0.825789	0.953	0.787	3.53e-49	1:DN1p_CNMa	CG42540
1.21e-52	-0.804661	0.742	0.87	1.92e-48	1:DN1p_CNMa	Ten-m
1.9e-52	0.865419	0.837	0.594	3.03e-48	1:DN1p_CNMa	CG3530
1.48e-51	0.884062	0.953	0.681	2.35e-47	1:DN1p_CNMa	emc
3.89e-51	0.586866	0.761	0.451	6.19e-47	1:DN1p_CNMa	Tl
2.9e-50	-1.21647	0.576	0.656	4.61e-46	1:DN1p_CNMa	sNPF
6.65e-50	0.873506	0.976	0.777	1.06e-45	1:DN1p_CNMa	Gfrl
1.3e-49	-0.864251	0.463	0.656	2.07e-45	1:DN1p_CNMa	CG9650
2.71e-49	-0.810939	0.618	0.802	4.31e-45	1:DN1p_CNMa	Ddc
5.21e-49	0.404798	1	1	8.28e-45	1:DN1p_CNMa	mt:ATPase6
6.15e-49	-0.657166	0.811	0.914	9.77e-45	1:DN1p_CNMa	nAChRalpha1
1.83e-48	-0.838539	0.218	0.507	2.91e-44	1:DN1p_CNMa	CG6154
1.3e-47	-0.988633	0.266	0.48	2.06e-43	1:DN1p_CNMa	Rh7
1.52e-47	0.784961	0.616	0.218	2.42e-43	1:DN1p_CNMa	hoe1
1.54e-47	-0.855631	0.568	0.702	2.45e-43	1:DN1p_CNMa	Ac13E
6.91e-47	-0.855298	0.511	0.711	1.1e-42	1:DN1p_CNMa	CG11000
1.92e-46	-0.647226	0.895	0.956	3.05e-42	1:DN1p_CNMa	CG42613
7.65e-46	-1.01028	0.561	0.698	1.22e-41	1:DN1p_CNMa	Nplp1
1.44e-45	0.787804	0.882	0.633	2.29e-41	1:DN1p_CNMa	CG34355
1.69e-45	0.67749	0.932	0.768	2.68e-41	1:DN1p_CNMa	HnRNP-K
1.96e-45	0.381705	0.279	0.029	3.11e-41	1:DN1p_CNMa	CG7236
4.68e-45	0.752123	0.642	0.36	7.43e-41	1:DN1p_CNMa	CG6959
5.95e-45	-1.09703	0.397	0.56	9.45e-41	1:DN1p_CNMa	DIP-delta
2.09e-44	0.42351	0.35	0.08	3.32e-40	1:DN1p_CNMa	CG5079
1.02e-43	0.845734	0.908	0.719	1.63e-39	1:DN1p_CNMa	CG10384
2.1e-43	-0.815422	0.455	0.637	3.33e-39	1:DN1p_CNMa	CG33543
3.83e-43	-0.794367	0.8	0.869	6.09e-39	1:DN1p_CNMa	CG15765
8.15e-43	0.401294	1	1	1.3e-38	1:DN1p_CNMa	mt:Cyt-b
1.19e-42	-0.737455	0.524	0.716	1.89e-38	1:DN1p_CNMa	Con
2.08e-42	0.59257	0.726	0.411	3.31e-38	1:DN1p_CNMa	VepD
6.09e-42	0.798543	0.805	0.285	9.68e-38	1:DN1p_CNMa	ham
2.49e-41	0.361637	1	1	3.95e-37	1:DN1p_CNMa	mt:tRNA:L:CUN
4.48e-41	-1.42246	0.205	0.304	7.12e-37	1:DN1p_CNMa	CG15082
5.3e-41	0.466725	0.989	0.929	8.42e-37	1:DN1p_CNMa	mt:ND3
1.5e-40	-1.50574	0.316	0.348	2.39e-36	1:DN1p_CNMa	CCHa1
1.98e-40	-0.737454	0.368	0.592	3.15e-36	1:DN1p_CNMa	Toll-6
2.36e-40	-0.648607	0.747	0.847	3.75e-36	1:DN1p_CNMa	Dop2R
2.36e-39	-1.25828	0.503	0.574	3.74e-35	1:DN1p_CNMa	AstA
2.61e-39	-0.727846	0.9	0.941	4.15e-35	1:DN1p_CNMa	amon
6.16e-39	0.889646	0.9	0.393	9.79e-35	1:DN1p_CNMa	gl
8.37e-39	-0.645097	0.934	0.974	1.33e-34	1:DN1p_CNMa	scyl
1.07e-38	0.468283	0.932	0.86	1.71e-34	1:DN1p_CNMa	mt:ND6
3.64e-38	0.604859	0.584	0.282	5.79e-34	1:DN1p_CNMa	PKD
4.18e-38	-0.677541	0.242	0.499	6.64e-34	1:DN1p_CNMa	CG42673
6.12e-38	0.326421	0.282	0.087	9.72e-34	1:DN1p_CNMa	CG7386
2.54e-37	0.615516	0.555	0.288	4.03e-33	1:DN1p_CNMa	rdgC
4.22e-37	0.48894	0.211	0.039	6.71e-33	1:DN1p_CNMa	CG17352
5.21e-37	-0.78376	0.342	0.539	8.27e-33	1:DN1p_CNMa	beat-Ic
1.32e-36	0.855863	0.989	0.736	2.09e-32	1:DN1p_CNMa	Mmp2
2.64e-36	0.306186	0.282	0.047	4.2e-32	1:DN1p_CNMa	CG11899
5.72e-36	-0.565249	0.879	0.949	9.09e-32	1:DN1p_CNMa	Sema-1a
1.95e-35	-1.10444	0.382	0.451	3.11e-31	1:DN1p_CNMa	Npc2b
2.1e-35	0.269216	0.276	0.106	3.33e-31	1:DN1p_CNMa	CG33288
3.75e-35	0.421199	0.25	0.07	5.96e-31	1:DN1p_CNMa	RYa-R
4.91e-35	-0.852643	0.376	0.515	7.8e-31	1:DN1p_CNMa	CG42394
5.25e-35	-0.597712	0.913	0.949	8.35e-31	1:DN1p_CNMa	klg
5.99e-35	-0.47172	0.989	0.988	9.52e-31	1:DN1p_CNMa	hth
1.33e-34	0.481663	0.471	0.156	2.11e-30	1:DN1p_CNMa	kibra
1.53e-34	0.349832	1	1	2.43e-30	1:DN1p_CNMa	mt:CoI
1.98e-34	-0.547164	0.776	0.923	3.15e-30	1:DN1p_CNMa	GluClalpha
2.36e-34	0.303908	0.182	0.032	3.75e-30	1:DN1p_CNMa	hubl
3.12e-34	0.303195	0.216	0.031	4.95e-30	1:DN1p_CNMa	Idgf5
6.23e-34	-0.731619	0.387	0.568	9.9e-30	1:DN1p_CNMa	CG42674
8.11e-34	0.598215	0.932	0.862	1.29e-29	1:DN1p_CNMa	sky
8.15e-34	0.507276	0.916	0.704	1.3e-29	1:DN1p_CNMa	CG43658
1.23e-33	-0.674747	0.518	0.636	1.95e-29	1:DN1p_CNMa	beat-IIIc
3.16e-33	0.80378	0.824	0.549	5.03e-29	1:DN1p_CNMa	beat-VI
4.04e-33	-0.499804	0.992	0.994	6.43e-29	1:DN1p_CNMa	Rbp6
4.27e-33	-0.672002	0.447	0.625	6.78e-29	1:DN1p_CNMa	Rgk2
7.13e-33	-0.596604	0.337	0.574	1.13e-28	1:DN1p_CNMa	cmpy
1.19e-32	0.629671	0.574	0.27	1.88e-28	1:DN1p_CNMa	beat-Vb
1.33e-32	-0.67358	0.939	0.947	2.11e-28	1:DN1p_CNMa	heph
2.55e-32	-0.725788	0.297	0.509	4.06e-28	1:DN1p_CNMa	dpr10
2.73e-32	-0.499402	0.997	0.999	4.33e-28	1:DN1p_CNMa	ps
4.25e-32	-0.590346	0.274	0.484	6.75e-28	1:DN1p_CNMa	beat-Ib
8.35e-32	-0.645613	0.405	0.581	1.33e-27	1:DN1p_CNMa	Epac
8.43e-32	-0.776066	0.311	0.501	1.34e-27	1:DN1p_CNMa	AstC-R2
1.09e-31	-0.599942	0.521	0.693	1.74e-27	1:DN1p_CNMa	CG32700
1.29e-31	0.793824	0.766	0.416	2.05e-27	1:DN1p_CNMa	beat-Va
1.61e-31	-0.538235	0.871	0.936	2.55e-27	1:DN1p_CNMa	mura
1.95e-31	-0.59558	0.513	0.692	3.09e-27	1:DN1p_CNMa	luna
6.33e-31	-0.428227	0.966	0.989	1.01e-26	1:DN1p_CNMa	cpo
8.29e-31	-0.80446	0.305	0.462	1.32e-26	1:DN1p_CNMa	robo3
9.21e-31	-0.38994	1	1	1.46e-26	1:DN1p_CNMa	sif
2.31e-30	0.283509	0.245	0.054	3.67e-26	1:DN1p_CNMa	CG34203
2.83e-30	-0.664873	0.189	0.405	4.5e-26	1:DN1p_CNMa	Fas3
4.52e-30	0.439347	0.997	0.976	7.18e-26	1:DN1p_CNMa	mt:srRNA
7.09e-30	0.313557	0.134	0.029	1.13e-25	1:DN1p_CNMa	Peritrophin-A
1.19e-29	-0.474715	0.571	0.759	1.89e-25	1:DN1p_CNMa	fend
1.62e-29	0.504504	0.518	0.202	2.57e-25	1:DN1p_CNMa	CG3726
2.56e-29	0.386808	0.974	0.935	4.08e-25	1:DN1p_CNMa	mt:ND2
4.18e-29	-0.634534	0.666	0.769	6.65e-25	1:DN1p_CNMa	CG8405
4.23e-29	-0.589459	0.229	0.444	6.73e-25	1:DN1p_CNMa	dpr3
5.53e-29	-0.535814	0.742	0.827	8.79e-25	1:DN1p_CNMa	Cbp53E
1.1e-28	0.588043	0.908	0.736	1.75e-24	1:DN1p_CNMa	pHCl
1.13e-28	-0.814888	0.489	0.589	1.8e-24	1:DN1p_CNMa	CrebA
1.32e-28	0.538392	0.903	0.747	2.1e-24	1:DN1p_CNMa	CG4502
1.36e-28	-0.681428	0.766	0.818	2.16e-24	1:DN1p_CNMa	Pdi
2.08e-28	-0.574568	0.526	0.673	3.31e-24	1:DN1p_CNMa	sty
3.42e-28	0.602394	0.384	0.108	5.44e-24	1:DN1p_CNMa	TrissinR
1.01e-27	-0.598961	0.861	0.906	1.61e-23	1:DN1p_CNMa	chinmo
1.9e-27	-0.362019	0.616	0.764	3.03e-23	1:DN1p_CNMa	CG34114
4.07e-27	-0.515641	0.539	0.682	6.47e-23	1:DN1p_CNMa	olf413
4.39e-27	0.454623	0.342	0.095	6.97e-23	1:DN1p_CNMa	CG1688
4.45e-27	-0.657232	0.887	0.898	7.07e-23	1:DN1p_CNMa	CG42795
6.23e-27	-0.783072	0.392	0.521	9.89e-23	1:DN1p_CNMa	CG15537
1.04e-26	-0.532477	0.626	0.782	1.65e-22	1:DN1p_CNMa	Fur1
1.08e-26	0.408305	1	0.999	1.71e-22	1:DN1p_CNMa	sgg
1.1e-26	0.516391	0.753	0.548	1.75e-22	1:DN1p_CNMa	CG8036
1.62e-26	-0.615618	0.361	0.499	2.57e-22	1:DN1p_CNMa	nvy
2.27e-26	-0.531999	0.458	0.592	3.61e-22	1:DN1p_CNMa	Nlg3
3.17e-26	0.601924	0.974	0.894	5.04e-22	1:DN1p_CNMa	Pdfr
3.18e-26	-0.47045	0.558	0.736	5.06e-22	1:DN1p_CNMa	CG42346
3.36e-26	-0.59577	0.653	0.766	5.35e-22	1:DN1p_CNMa	Dscam2
4.14e-26	-0.581805	0.171	0.349	6.58e-22	1:DN1p_CNMa	CG31814
4.28e-26	0.558278	0.855	0.771	6.8e-22	1:DN1p_CNMa	Mkp3
4.37e-26	0.306862	1	1	6.95e-22	1:DN1p_CNMa	mt:CoII
4.38e-26	-0.782203	0.3	0.413	6.95e-22	1:DN1p_CNMa	Pka-C3
6.16e-26	-0.386429	0.879	0.952	9.79e-22	1:DN1p_CNMa	nAChRbeta1
6.47e-26	0.324515	1	0.998	1.03e-21	1:DN1p_CNMa	mt:tRNA:H
9.85e-26	0.484138	0.805	0.619	1.57e-21	1:DN1p_CNMa	plx
1.11e-25	0.382271	0.416	0.138	1.76e-21	1:DN1p_CNMa	Rep
1.45e-25	-0.584521	0.226	0.388	2.3e-21	1:DN1p_CNMa	sNPF-R
1.47e-25	-0.374469	0.908	0.933	2.34e-21	1:DN1p_CNMa	ChAT
2.86e-25	-0.465	0.579	0.7	4.55e-21	1:DN1p_CNMa	kek1
5.56e-25	-0.593844	0.176	0.331	8.83e-21	1:DN1p_CNMa	CG8745
6.98e-25	-0.343368	0.961	0.987	1.11e-20	1:DN1p_CNMa	nAChRalpha6
9.49e-25	-0.572407	0.239	0.395	1.51e-20	1:DN1p_CNMa	Dh31-R
1.56e-24	-0.529414	0.295	0.47	2.48e-20	1:DN1p_CNMa	CG32521
1.59e-24	-0.521683	0.468	0.634	2.53e-20	1:DN1p_CNMa	RapGAP1
1.6e-24	0.347318	0.524	0.289	2.54e-20	1:DN1p_CNMa	mt:tRNA:A
1.65e-24	-0.539095	0.363	0.516	2.62e-20	1:DN1p_CNMa	CG31191
2.24e-24	-0.501694	0.7	0.791	3.56e-20	1:DN1p_CNMa	5-HT1A
7.14e-24	-0.434637	0.884	0.952	1.14e-19	1:DN1p_CNMa	Fife
1.17e-23	-0.455001	0.097	0.294	1.87e-19	1:DN1p_CNMa	Hr51
1.85e-23	-0.609677	0.666	0.725	2.94e-19	1:DN1p_CNMa	jdp
1.9e-23	0.626693	0.703	0.391	3.02e-19	1:DN1p_CNMa	CG13408
2.03e-23	-0.423725	0.813	0.869	3.22e-19	1:DN1p_CNMa	CG7708
4.04e-23	-0.511024	0.574	0.679	6.42e-19	1:DN1p_CNMa	NK7.1
4.24e-23	-0.42047	0.821	0.883	6.73e-19	1:DN1p_CNMa	Spred
5.11e-23	-0.666422	0.768	0.753	8.12e-19	1:DN1p_CNMa	CG8861
5.2e-23	-0.469811	0.661	0.727	8.27e-19	1:DN1p_CNMa	CG42541
5.75e-23	-0.385929	0.966	0.992	9.13e-19	1:DN1p_CNMa	pum
8.75e-23	-0.307643	0.908	0.949	1.39e-18	1:DN1p_CNMa	mub
9.35e-23	-0.526045	0.282	0.442	1.49e-18	1:DN1p_CNMa	Dscam3
9.64e-23	-0.580276	0.347	0.435	1.53e-18	1:DN1p_CNMa	DIP-beta
1.03e-22	0.544924	0.945	0.879	1.64e-18	1:DN1p_CNMa	CG34384
1.45e-22	-0.335937	0.874	0.888	2.3e-18	1:DN1p_CNMa	Lim1
2.38e-22	-0.329483	0.818	0.88	3.78e-18	1:DN1p_CNMa	CG18208
3.4e-22	0.428033	0.955	0.89	5.41e-18	1:DN1p_CNMa	CG6767
3.78e-22	0.504666	0.761	0.506	6.01e-18	1:DN1p_CNMa	CG42313
3.83e-22	-0.307173	0.484	0.611	6.08e-18	1:DN1p_CNMa	wake
4e-22	-0.45123	0.658	0.749	6.35e-18	1:DN1p_CNMa	GluRIB
7.85e-22	-0.517452	0.184	0.312	1.25e-17	1:DN1p_CNMa	lov
1.34e-21	-0.463597	0.411	0.603	2.13e-17	1:DN1p_CNMa	CG5758
1.47e-21	-0.591494	0.358	0.5	2.34e-17	1:DN1p_CNMa	CG11221
1.51e-21	-0.491941	0.732	0.846	2.39e-17	1:DN1p_CNMa	2mit
2.75e-21	-0.48481	0.5	0.686	4.36e-17	1:DN1p_CNMa	CG32206
5.86e-21	0.554929	0.624	0.36	9.32e-17	1:DN1p_CNMa	CG4297
6.41e-21	0.524228	0.447	0.211	1.02e-16	1:DN1p_CNMa	Dat
1.44e-20	-0.480145	0.324	0.464	2.28e-16	1:DN1p_CNMa	dpr17
1.58e-20	-0.50772	0.945	0.951	2.51e-16	1:DN1p_CNMa	scrt
1.6e-20	-0.491871	0.837	0.895	2.54e-16	1:DN1p_CNMa	Ca-alpha1T
3.16e-20	-0.429096	0.213	0.387	5.01e-16	1:DN1p_CNMa	btsz
3.2e-20	-0.493864	0.211	0.342	5.08e-16	1:DN1p_CNMa	Fkbp14
3.42e-20	-0.313889	0.513	0.6	5.43e-16	1:DN1p_CNMa	zfh2
3.56e-20	-0.554869	0.079	0.196	5.66e-16	1:DN1p_CNMa	slp1
3.84e-20	-0.398033	0.324	0.494	6.11e-16	1:DN1p_CNMa	Nmdar1
4.5e-20	0.59968	0.921	0.789	7.15e-16	1:DN1p_CNMa	CG34356
4.82e-20	0.437854	0.876	0.61	7.65e-16	1:DN1p_CNMa	Mp
5.57e-20	-0.443214	0.158	0.375	8.85e-16	1:DN1p_CNMa	Or45a
6.23e-20	-0.511357	0.213	0.36	9.9e-16	1:DN1p_CNMa	CG1504
6.74e-20	0.379408	0.337	0.131	1.07e-15	1:DN1p_CNMa	Gyc-89Db
7.56e-20	-0.437532	0.95	0.967	1.2e-15	1:DN1p_CNMa	fru
8.05e-20	0.463146	0.879	0.749	1.28e-15	1:DN1p_CNMa	Trpm
8.5e-20	-0.434966	0.768	0.83	1.35e-15	1:DN1p_CNMa	TMS1
8.56e-20	-0.348272	0.934	0.968	1.36e-15	1:DN1p_CNMa	Alk
1.45e-19	-0.446518	0.413	0.543	2.31e-15	1:DN1p_CNMa	LpR2
1.5e-19	-0.454993	0.771	0.796	2.39e-15	1:DN1p_CNMa	hig
1.72e-19	-0.270047	0.647	0.748	2.74e-15	1:DN1p_CNMa	bi
1.99e-19	-0.548656	0.458	0.57	3.16e-15	1:DN1p_CNMa	pgant2
2.35e-19	-0.464969	0.576	0.701	3.73e-15	1:DN1p_CNMa	CG14762
2.35e-19	0.512097	0.592	0.244	3.74e-15	1:DN1p_CNMa	beat-Vc
2.67e-19	0.694138	0.65	0.573	4.25e-15	1:DN1p_CNMa	CG30089
2.98e-19	0.356558	0.968	0.879	4.73e-15	1:DN1p_CNMa	RpL11
3.34e-19	-0.429846	0.782	0.845	5.31e-15	1:DN1p_CNMa	Ktl
3.37e-19	-0.43423	0.184	0.347	5.36e-15	1:DN1p_CNMa	CG34371
3.45e-19	-0.400129	0.092	0.275	5.49e-15	1:DN1p_CNMa	CG5916
3.56e-19	-0.500582	0.576	0.681	5.65e-15	1:DN1p_CNMa	LpR1
3.87e-19	0.306723	0.179	0.045	6.15e-15	1:DN1p_CNMa	CG31676
4.68e-19	-0.522182	0.245	0.334	7.43e-15	1:DN1p_CNMa	CG1402
4.78e-19	-0.359656	0.763	0.875	7.6e-15	1:DN1p_CNMa	CG33111
5.15e-19	-0.463074	0.358	0.439	8.18e-15	1:DN1p_CNMa	CG33639
6.72e-19	-0.328917	0.2	0.344	1.07e-14	1:DN1p_CNMa	hec
6.72e-19	0.511426	0.868	0.58	1.07e-14	1:DN1p_CNMa	D
1.15e-18	-0.428936	0.692	0.814	1.82e-14	1:DN1p_CNMa	CG9813
1.85e-18	0.585212	0.568	0.318	2.94e-14	1:DN1p_CNMa	esn
2.1e-18	-0.549575	0.121	0.226	3.33e-14	1:DN1p_CNMa	TrpA1
2.1e-18	-0.479072	0.589	0.722	3.34e-14	1:DN1p_CNMa	Pde8
2.27e-18	0.301446	0.995	0.961	3.61e-14	1:DN1p_CNMa	RpS7
2.44e-18	0.445273	0.734	0.58	3.88e-14	1:DN1p_CNMa	Akap200
2.66e-18	0.469758	0.626	0.479	4.23e-14	1:DN1p_CNMa	Sik3
2.9e-18	-0.428399	0.842	0.919	4.61e-14	1:DN1p_CNMa	Rbp9
3.01e-18	0.536928	0.942	0.89	4.78e-14	1:DN1p_CNMa	CG13054
3.08e-18	-0.385394	0.095	0.244	4.9e-14	1:DN1p_CNMa	Drep3
3.19e-18	-0.410305	0.263	0.406	5.06e-14	1:DN1p_CNMa	dpr2
4.06e-18	-0.311521	0.997	0.999	6.45e-14	1:DN1p_CNMa	shep
4.19e-18	0.299862	0.997	0.995	6.66e-14	1:DN1p_CNMa	mt:ND1
4.56e-18	-0.354023	0.997	0.999	7.25e-14	1:DN1p_CNMa	Hrb27C
5.04e-18	-0.439907	0.739	0.817	8.02e-14	1:DN1p_CNMa	tyf
5.6e-18	0.378006	0.284	0.112	8.89e-14	1:DN1p_CNMa	CG43861
5.63e-18	-0.482815	0.847	0.864	8.95e-14	1:DN1p_CNMa	Pal2
6.72e-18	-0.402323	0.637	0.739	1.07e-13	1:DN1p_CNMa	CG6123
7.09e-18	-0.377183	0.803	0.899	1.13e-13	1:DN1p_CNMa	CG16779
7.13e-18	-0.436084	0.8	0.875	1.13e-13	1:DN1p_CNMa	NaCP60E
9.04e-18	-0.431792	0.829	0.871	1.44e-13	1:DN1p_CNMa	CG1275
1e-17	0.263018	1	1	1.59e-13	1:DN1p_CNMa	mt:ATPase8
1.01e-17	-0.528448	0.347	0.451	1.61e-13	1:DN1p_CNMa	ct
1.14e-17	-0.4332	0.187	0.329	1.82e-13	1:DN1p_CNMa	SIFaR
1.16e-17	0.272155	0.997	0.988	1.84e-13	1:DN1p_CNMa	mt:ND5
1.75e-17	0.422216	0.805	0.639	2.79e-13	1:DN1p_CNMa	CG42732
2.43e-17	-0.354782	0.121	0.258	3.86e-13	1:DN1p_CNMa	CG30158
2.46e-17	-0.46167	0.413	0.514	3.91e-13	1:DN1p_CNMa	drl
3.18e-17	-0.3985	0.192	0.366	5.05e-13	1:DN1p_CNMa	SPR
3.68e-17	-0.520536	0.476	0.619	5.85e-13	1:DN1p_CNMa	krz
6.18e-17	-0.446524	0.545	0.698	9.82e-13	1:DN1p_CNMa	CG3645
7.71e-17	-0.261369	0.784	0.864	1.22e-12	1:DN1p_CNMa	Pde9
8.09e-17	-0.27379	0.989	0.995	1.29e-12	1:DN1p_CNMa	spen
1.45e-16	-0.356312	0.695	0.791	2.3e-12	1:DN1p_CNMa	dpr14
1.96e-16	-0.354794	0.15	0.309	3.11e-12	1:DN1p_CNMa	CG13654
1.96e-16	-0.323188	0.134	0.276	3.12e-12	1:DN1p_CNMa	CG34106
2.24e-16	0.479836	0.792	0.668	3.57e-12	1:DN1p_CNMa	CG32683
2.28e-16	0.323222	0.995	0.959	3.63e-12	1:DN1p_CNMa	RpL4
4.13e-16	-0.342423	0.392	0.53	6.57e-12	1:DN1p_CNMa	beat-IIIb
4.5e-16	-0.32461	0.963	0.989	7.16e-12	1:DN1p_CNMa	kis
5.54e-16	-0.396057	0.074	0.195	8.81e-12	1:DN1p_CNMa	opa
5.7e-16	-0.468914	0.432	0.539	9.06e-12	1:DN1p_CNMa	noc
7.22e-16	0.404909	0.539	0.31	1.15e-11	1:DN1p_CNMa	CG13506
7.92e-16	0.27259	0.389	0.2	1.26e-11	1:DN1p_CNMa	AnxB10
9.4e-16	0.486096	0.997	0.987	1.49e-11	1:DN1p_CNMa	SK
1.02e-15	-0.337102	0.045	0.191	1.61e-11	1:DN1p_CNMa	LamC
1.02e-15	0.331289	0.532	0.363	1.62e-11	1:DN1p_CNMa	CG9795
1.1e-15	-0.376374	0.1	0.209	1.75e-11	1:DN1p_CNMa	ap
1.17e-15	-0.473466	0.426	0.574	1.86e-11	1:DN1p_CNMa	CG33143
1.37e-15	-0.40734	0.134	0.267	2.17e-11	1:DN1p_CNMa	CG17193
1.56e-15	-0.338167	0.058	0.203	2.48e-11	1:DN1p_CNMa	beat-IIb
1.66e-15	0.373206	0.908	0.772	2.64e-11	1:DN1p_CNMa	CG31808
1.79e-15	-0.605285	0.074	0.142	2.84e-11	1:DN1p_CNMa	CG13056
1.96e-15	-0.385162	0.524	0.659	3.11e-11	1:DN1p_CNMa	Snoo
2.15e-15	0.305406	0.613	0.424	3.42e-11	1:DN1p_CNMa	dmpd
2.53e-15	-0.502572	0.766	0.794	4.02e-11	1:DN1p_CNMa	Sytbeta
2.59e-15	0.440916	0.476	0.314	4.11e-11	1:DN1p_CNMa	Dif
2.64e-15	0.256952	0.216	0.092	4.2e-11	1:DN1p_CNMa	Vha100-2
2.73e-15	0.420666	0.916	0.831	4.34e-11	1:DN1p_CNMa	dpr8
3.96e-15	-0.304658	0.453	0.599	6.3e-11	1:DN1p_CNMa	Fas2
4.26e-15	-0.449374	0.434	0.486	6.77e-11	1:DN1p_CNMa	CG8216
4.34e-15	-0.411229	0.232	0.311	6.9e-11	1:DN1p_CNMa	Indy
5.69e-15	0.411107	0.879	0.645	9.04e-11	1:DN1p_CNMa	Rfx
5.98e-15	-0.407163	0.476	0.57	9.5e-11	1:DN1p_CNMa	Tsp66E
7.47e-15	0.404494	0.321	0.105	1.19e-10	1:DN1p_CNMa	CG34247
8.7e-15	0.460514	0.716	0.641	1.38e-10	1:DN1p_CNMa	Pdk1
9.44e-15	-0.354531	0.787	0.882	1.5e-10	1:DN1p_CNMa	CG6424
1.08e-14	-0.279345	0.103	0.25	1.72e-10	1:DN1p_CNMa	CG33993
1.27e-14	-0.388146	0.029	0.141	2.02e-10	1:DN1p_CNMa	CG43117
1.65e-14	-0.470777	0.305	0.373	2.63e-10	1:DN1p_CNMa	GstD1
2.12e-14	0.358386	0.568	0.414	3.37e-10	1:DN1p_CNMa	Pif1B
2.78e-14	-0.379689	0.813	0.84	4.42e-10	1:DN1p_CNMa	CG34362
2.78e-14	-0.408337	0.247	0.356	4.42e-10	1:DN1p_CNMa	Tdc2
2.93e-14	0.426774	0.547	0.369	4.66e-10	1:DN1p_CNMa	FBgn0285913
3.26e-14	-0.322866	0.097	0.228	5.17e-10	1:DN1p_CNMa	CG31323
3.3e-14	-0.258994	0.979	0.985	5.25e-10	1:DN1p_CNMa	CG42492
3.58e-14	-0.339714	0.271	0.443	5.68e-10	1:DN1p_CNMa	hppy
5.41e-14	0.565495	0.892	0.805	8.59e-10	1:DN1p_CNMa	unc-13-4A
1.14e-13	0.406922	0.984	0.929	1.81e-09	1:DN1p_CNMa	CG43729
1.17e-13	-0.35232	0.961	0.976	1.86e-09	1:DN1p_CNMa	bol
1.25e-13	-0.282411	0.937	0.929	1.99e-09	1:DN1p_CNMa	Hasp
1.28e-13	-0.352423	0.276	0.384	2.03e-09	1:DN1p_CNMa	Sema-2b
1.28e-13	-0.35795	0.695	0.777	2.04e-09	1:DN1p_CNMa	CG2918
1.28e-13	-0.384076	0.247	0.337	2.04e-09	1:DN1p_CNMa	twz
1.32e-13	-0.427987	0.734	0.748	2.1e-09	1:DN1p_CNMa	ed
1.34e-13	0.27744	0.989	0.959	2.12e-09	1:DN1p_CNMa	FBgn0285949
1.51e-13	-0.304129	0.037	0.157	2.4e-09	1:DN1p_CNMa	CG15534
1.6e-13	0.278032	0.979	0.933	2.54e-09	1:DN1p_CNMa	RpL23
1.68e-13	-0.352474	0.642	0.722	2.67e-09	1:DN1p_CNMa	AcCoAS
1.79e-13	-0.33095	0.068	0.167	2.85e-09	1:DN1p_CNMa	dimm
2.11e-13	0.295157	0.247	0.105	3.35e-09	1:DN1p_CNMa	CG8771
2.28e-13	-0.284032	0.966	0.96	3.63e-09	1:DN1p_CNMa	Cngl
2.6e-13	-0.324539	0.947	0.964	4.14e-09	1:DN1p_CNMa	mtd
2.61e-13	-0.328602	0.229	0.356	4.15e-09	1:DN1p_CNMa	CG46301
2.89e-13	-0.270802	0.276	0.395	4.6e-09	1:DN1p_CNMa	5-HT2B
3.69e-13	0.405179	0.603	0.446	5.86e-09	1:DN1p_CNMa	CG15803
3.71e-13	-0.354948	0.318	0.421	5.89e-09	1:DN1p_CNMa	dpr6
3.72e-13	-0.319348	0.884	0.927	5.92e-09	1:DN1p_CNMa	Frq1
4.6e-13	-0.265621	0.963	0.974	7.32e-09	1:DN1p_CNMa	chic
4.94e-13	-0.407619	0.832	0.832	7.84e-09	1:DN1p_CNMa	Corin
5.11e-13	-0.339728	0.129	0.201	8.12e-09	1:DN1p_CNMa	CG4766
5.49e-13	-0.299972	0.15	0.285	8.72e-09	1:DN1p_CNMa	CG32982
5.76e-13	-0.321247	0.961	0.98	9.16e-09	1:DN1p_CNMa	brat
6.29e-13	0.295513	0.987	0.945	9.99e-09	1:DN1p_CNMa	RpS5a
7.73e-13	-0.348047	0.068	0.154	1.23e-08	1:DN1p_CNMa	CG13950
7.79e-13	0.349027	0.403	0.275	1.24e-08	1:DN1p_CNMa	tkv
9.82e-13	-0.324339	0.168	0.294	1.56e-08	1:DN1p_CNMa	CG46121
9.91e-13	0.379114	0.837	0.731	1.58e-08	1:DN1p_CNMa	Pkc53E
1.06e-12	0.292683	0.203	0.069	1.69e-08	1:DN1p_CNMa	mthl14
1.21e-12	0.291526	0.908	0.811	1.92e-08	1:DN1p_CNMa	Cow
1.25e-12	-0.259888	0.774	0.81	1.99e-08	1:DN1p_CNMa	NetB
1.25e-12	0.427905	0.558	0.496	1.99e-08	1:DN1p_CNMa	CR45316
1.28e-12	-0.37855	0.016	0.123	2.04e-08	1:DN1p_CNMa	CG15394
1.32e-12	-0.319124	0.108	0.211	2.11e-08	1:DN1p_CNMa	rdo
1.62e-12	-0.342833	0.216	0.37	2.58e-08	1:DN1p_CNMa	comm
1.66e-12	-0.295846	0.121	0.219	2.64e-08	1:DN1p_CNMa	dpr20
1.73e-12	-0.373611	0.666	0.778	2.74e-08	1:DN1p_CNMa	CG5065
1.79e-12	0.323912	0.824	0.67	2.85e-08	1:DN1p_CNMa	Gdh
2.09e-12	-0.31005	0.339	0.503	3.33e-08	1:DN1p_CNMa	CG17124
2.29e-12	0.368629	0.903	0.837	3.64e-08	1:DN1p_CNMa	CG42750
2.82e-12	-0.383068	0.595	0.63	4.48e-08	1:DN1p_CNMa	side
2.87e-12	-0.31759	0.079	0.2	4.56e-08	1:DN1p_CNMa	CG10738
2.97e-12	-0.266214	0.071	0.179	4.72e-08	1:DN1p_CNMa	MFS3
3.08e-12	-0.639237	0.534	0.426	4.9e-08	1:DN1p_CNMa	CG31705
3.44e-12	0.30782	1	0.997	5.46e-08	1:DN1p_CNMa	cpx
4.08e-12	0.320626	0.866	0.738	6.49e-08	1:DN1p_CNMa	CG16817
4.33e-12	0.347998	0.945	0.843	6.88e-08	1:DN1p_CNMa	CG14509
4.96e-12	0.324511	0.655	0.567	7.88e-08	1:DN1p_CNMa	klar
7.18e-12	-0.296638	0.687	0.744	1.14e-07	1:DN1p_CNMa	Liprin-gamma
1.07e-11	0.310019	0.568	0.406	1.71e-07	1:DN1p_CNMa	CG42637
1.09e-11	0.308219	0.476	0.294	1.73e-07	1:DN1p_CNMa	CG6685
1.09e-11	-0.363816	0.974	0.95	1.74e-07	1:DN1p_CNMa	CG4577
1.21e-11	-0.322288	0.795	0.789	1.92e-07	1:DN1p_CNMa	CG42402
1.24e-11	0.250607	0.987	0.906	1.97e-07	1:DN1p_CNMa	RpL26
1.28e-11	0.303527	0.903	0.805	2.03e-07	1:DN1p_CNMa	CG12071
1.28e-11	0.293252	0.908	0.796	2.04e-07	1:DN1p_CNMa	crc
1.67e-11	-0.257401	1	0.996	2.66e-07	1:DN1p_CNMa	mamo
2.26e-11	0.320562	0.363	0.175	3.59e-07	1:DN1p_CNMa	Lasp
2.28e-11	-0.569234	0.126	0.183	3.63e-07	1:DN1p_CNMa	Arc1
2.32e-11	0.474761	0.932	0.789	3.68e-07	1:DN1p_CNMa	CG43902
2.39e-11	0.279402	0.908	0.849	3.81e-07	1:DN1p_CNMa	Lpin
2.64e-11	0.340422	0.65	0.485	4.19e-07	1:DN1p_CNMa	Act42A
2.68e-11	-0.269448	0.189	0.297	4.26e-07	1:DN1p_CNMa	Nep1
2.99e-11	0.337021	0.839	0.715	4.76e-07	1:DN1p_CNMa	KCNQ
3.03e-11	0.280916	0.334	0.186	4.82e-07	1:DN1p_CNMa	jumu
3.11e-11	0.312564	0.789	0.693	4.94e-07	1:DN1p_CNMa	Sln
3.72e-11	-0.313847	0.179	0.277	5.9e-07	1:DN1p_CNMa	CG12730
4.67e-11	0.330339	0.813	0.647	7.42e-07	1:DN1p_CNMa	plum
4.73e-11	0.250224	0.971	0.915	7.51e-07	1:DN1p_CNMa	FBgn0285948
5.28e-11	0.295039	0.429	0.245	8.39e-07	1:DN1p_CNMa	Nop56
5.29e-11	-0.348286	0.55	0.603	8.41e-07	1:DN1p_CNMa	CG2082
5.46e-11	-0.290473	0.768	0.821	8.68e-07	1:DN1p_CNMa	CG11873
5.96e-11	-0.322251	0.313	0.373	9.47e-07	1:DN1p_CNMa	beat-IIa
6.2e-11	-0.251825	0.016	0.128	9.85e-07	1:DN1p_CNMa	Fer2
6.24e-11	0.305764	0.958	0.93	9.92e-07	1:DN1p_CNMa	Syp
7.12e-11	0.391029	0.782	0.73	1.13e-06	1:DN1p_CNMa	Nlg2
8.46e-11	-0.280366	0.603	0.704	1.34e-06	1:DN1p_CNMa	kek6
1.02e-10	0.268253	0.974	0.956	1.62e-06	1:DN1p_CNMa	RpL14
1.09e-10	0.290253	0.963	0.894	1.73e-06	1:DN1p_CNMa	slgA
1.35e-10	-0.276401	0.179	0.279	2.14e-06	1:DN1p_CNMa	CG43795
1.43e-10	0.400001	0.961	0.929	2.28e-06	1:DN1p_CNMa	Argk
1.48e-10	-0.286041	0.871	0.897	2.36e-06	1:DN1p_CNMa	CG31688
1.8e-10	-0.277059	0.603	0.718	2.86e-06	1:DN1p_CNMa	Rab26
2.54e-10	0.290419	0.287	0.173	4.03e-06	1:DN1p_CNMa	alpha-Man-IIb
2.76e-10	0.273824	0.987	0.927	4.38e-06	1:DN1p_CNMa	RpLP1
2.97e-10	-0.335805	0.663	0.736	4.72e-06	1:DN1p_CNMa	sff
3.01e-10	-0.292523	0.208	0.291	4.79e-06	1:DN1p_CNMa	Best1
3.19e-10	-0.314411	0.487	0.581	5.07e-06	1:DN1p_CNMa	drpr
3.21e-10	-0.279137	0.145	0.248	5.1e-06	1:DN1p_CNMa	CG7991
3.28e-10	0.256736	0.966	0.942	5.22e-06	1:DN1p_CNMa	RpS4
3.42e-10	-0.33574	0.784	0.83	5.43e-06	1:DN1p_CNMa	unk
3.62e-10	-0.325994	0.526	0.613	5.75e-06	1:DN1p_CNMa	dpr4
3.86e-10	-0.273298	0.389	0.487	6.13e-06	1:DN1p_CNMa	CG13907
4.73e-10	0.358177	0.963	0.967	7.52e-06	1:DN1p_CNMa	A2bp1
4.85e-10	-0.357873	0.824	0.814	7.71e-06	1:DN1p_CNMa	CG42389
6.15e-10	0.372403	0.829	0.609	9.78e-06	1:DN1p_CNMa	fred
6.29e-10	-0.273396	0.718	0.789	9.99e-06	1:DN1p_CNMa	l(1)G0320
6.56e-10	0.33171	0.918	0.884	1.04e-05	1:DN1p_CNMa	Tet
8.56e-10	0.318097	0.408	0.174	1.36e-05	1:DN1p_CNMa	danr
9.5e-10	-0.299937	0.742	0.776	1.51e-05	1:DN1p_CNMa	SRPK
1e-09	-0.283661	0.745	0.832	1.6e-05	1:DN1p_CNMa	Ptp99A
1.24e-09	0.316923	0.629	0.477	1.97e-05	1:DN1p_CNMa	puc
1.42e-09	-0.497776	0.439	0.443	2.25e-05	1:DN1p_CNMa	Thor
1.49e-09	-0.305336	0.618	0.677	2.37e-05	1:DN1p_CNMa	CG9003
2.2e-09	-0.30138	0.534	0.583	3.5e-05	1:DN1p_CNMa	CG34354
2.66e-09	0.261265	0.461	0.368	4.23e-05	1:DN1p_CNMa	gukh
2.93e-09	0.310597	0.871	0.677	4.66e-05	1:DN1p_CNMa	beat-Ia
2.97e-09	-0.294248	0.542	0.595	4.71e-05	1:DN1p_CNMa	Octbeta2R
3.37e-09	0.272406	0.784	0.667	5.35e-05	1:DN1p_CNMa	FBgn0285952
3.43e-09	0.336463	0.761	0.621	5.45e-05	1:DN1p_CNMa	Sytalpha
4.05e-09	0.31659	0.882	0.783	6.43e-05	1:DN1p_CNMa	sick
4.52e-09	-0.404644	0.379	0.42	7.19e-05	1:DN1p_CNMa	CG17839
6.04e-09	-0.305349	0.618	0.714	9.59e-05	1:DN1p_CNMa	EcR
6.56e-09	-0.325276	0.103	0.142	0.000104255	1:DN1p_CNMa	Nplp3
7.25e-09	0.340706	0.663	0.529	0.000115156	1:DN1p_CNMa	rgn
7.8e-09	-0.364816	0.405	0.441	0.000124	1:DN1p_CNMa	CG15098
8.03e-09	-0.274205	0.474	0.572	0.000127689	1:DN1p_CNMa	CG32815
9.04e-09	-0.525536	0.161	0.186	0.00014363	1:DN1p_CNMa	CG15784
9.35e-09	0.387024	0.829	0.792	0.000148674	1:DN1p_CNMa	Ppcs
1.01e-08	-0.460368	0.726	0.721	0.000160314	1:DN1p_CNMa	CG15630
1.26e-08	0.329833	0.684	0.562	0.000200415	1:DN1p_CNMa	Dys
1.43e-08	0.319122	0.682	0.578	0.000227397	1:DN1p_CNMa	CG11030
1.68e-08	0.377881	0.563	0.405	0.000267053	1:DN1p_CNMa	cno
1.9e-08	-0.264145	0.666	0.705	0.000302022	1:DN1p_CNMa	CG30116
1.91e-08	0.257105	0.958	0.901	0.000303053	1:DN1p_CNMa	RpL10Ab
2.54e-08	-0.278607	0.403	0.438	0.000403125	1:DN1p_CNMa	CG13229
2.8e-08	0.291465	0.95	0.943	0.000445704	1:DN1p_CNMa	CG42784
3.3e-08	-0.267578	0.545	0.604	0.000524594	1:DN1p_CNMa	Hs3st-A
3.34e-08	-0.263626	0.234	0.309	0.000531177	1:DN1p_CNMa	CG13248
3.44e-08	0.274351	0.997	0.978	0.0005474	1:DN1p_CNMa	RpLP2
3.56e-08	-0.271789	0.813	0.851	0.00056503	1:DN1p_CNMa	CG31687
3.7e-08	-0.389168	0.789	0.7	0.000588127	1:DN1p_CNMa	SoxN
4.08e-08	0.263905	0.484	0.239	0.000648403	1:DN1p_CNMa	FMRFaR
4.45e-08	-0.287341	0.911	0.919	0.000707996	1:DN1p_CNMa	jeb
4.64e-08	-0.251988	0.476	0.596	0.000737527	1:DN1p_CNMa	Atf6
5.66e-08	0.301948	0.808	0.684	0.000899683	1:DN1p_CNMa	CG12484
5.72e-08	-0.330319	0.992	0.97	0.000908941	1:DN1p_CNMa	rad
6.02e-08	-0.259302	0.224	0.294	0.000956476	1:DN1p_CNMa	sdk
7.45e-08	0.318817	0.866	0.607	0.00118464	1:DN1p_CNMa	Sox21b
8.62e-08	0.252661	0.716	0.609	0.00137071	1:DN1p_CNMa	CG32549
9.2e-08	0.276863	0.332	0.239	0.00146237	1:DN1p_CNMa	Teh4
1.32e-07	0.311859	0.437	0.219	0.00210093	1:DN1p_CNMa	twit
1.45e-07	-0.272193	0.476	0.557	0.002298	1:DN1p_CNMa	pgant5
1.45e-07	0.268914	0.771	0.665	0.00230137	1:DN1p_CNMa	CG9005
1.52e-07	0.310721	0.629	0.563	0.00240974	1:DN1p_CNMa	CG1513
2.15e-07	-0.330263	0.776	0.812	0.00341524	1:DN1p_CNMa	PRL-1
2.16e-07	0.383821	0.832	0.724	0.00342906	1:DN1p_CNMa	CG32052
2.49e-07	0.281828	0.789	0.687	0.00395049	1:DN1p_CNMa	Frq2
2.63e-07	-0.253911	0.718	0.781	0.00417683	1:DN1p_CNMa	CG10960
2.79e-07	-0.293443	0.561	0.583	0.00444165	1:DN1p_CNMa	CG15270
2.89e-07	0.285648	0.308	0.169	0.00459733	1:DN1p_CNMa	CCHa2-R
4.43e-07	0.373885	0.345	0.152	0.00703629	1:DN1p_CNMa	Rab32
4.46e-07	0.382214	0.497	0.389	0.00708698	1:DN1p_CNMa	CG10947
4.72e-07	0.272234	0.463	0.323	0.00750854	1:DN1p_CNMa	ATP8B
5.13e-07	-0.263613	0.326	0.41	0.0081541	1:DN1p_CNMa	CG5885
1.21e-06	0.250058	0.713	0.681	0.0193002	1:DN1p_CNMa	cact
2e-06	-0.25708	0.442	0.555	0.031836	1:DN1p_CNMa	ergic53
2.07e-06	-0.274289	0.813	0.842	0.0329341	1:DN1p_CNMa	CG5830
2.52e-06	-0.277062	0.542	0.573	0.0399814	1:DN1p_CNMa	mspo
3.42e-06	-0.265003	0.439	0.479	0.0543907	1:DN1p_CNMa	Oamb
3.86e-06	0.266468	0.655	0.536	0.0612902	1:DN1p_CNMa	Src64B
4.52e-06	0.275711	0.684	0.563	0.071828	1:DN1p_CNMa	Idh
5e-06	0.273613	0.532	0.435	0.0795004	1:DN1p_CNMa	CG13784
5.09e-06	0.276056	0.661	0.554	0.0808951	1:DN1p_CNMa	CG9705
5.32e-06	0.261986	0.271	0.181	0.0846128	1:DN1p_CNMa	ST6Gal
5.96e-06	-0.292458	0.471	0.489	0.0947282	1:DN1p_CNMa	app
9.11e-06	0.37854	0.492	0.335	0.144712	1:DN1p_CNMa	Dop1R2
2.06e-05	-0.32603	0.584	0.571	0.327504	1:DN1p_CNMa	Dh44
2.19e-05	0.254875	0.432	0.281	0.348489	1:DN1p_CNMa	bark
4.09e-05	0.624387	0.132	0.115	0.65001	1:DN1p_CNMa	CG1678
4.24e-05	-0.251138	0.532	0.497	0.673539	1:DN1p_CNMa	CG4168
5.38e-05	0.261587	0.458	0.382	0.854662	1:DN1p_CNMa	pyd
5.73e-05	0.257662	0.126	0.108	0.911243	1:DN1p_CNMa	CG45080
5.86e-05	0.418215	0.597	0.408	0.931495	1:DN1p_CNMa	nrv1
7.81e-05	0.274571	0.882	0.765	1	1:DN1p_CNMa	dpr13
0.0001011	-0.296764	0.218	0.246	1	1:DN1p_CNMa	Nmdmc
0.000208744	0.256147	0.355	0.271	1	1:DN1p_CNMa	Hsl
0.000222511	0.271595	0.674	0.601	1	1:DN1p_CNMa	CG32369
0.000329633	0.326286	0.866	0.877	1	1:DN1p_CNMa	Dop1R1
0.00695778	-0.251284	0.345	0.344	1	1:DN1p_CNMa	CG5157
1.01e-78	2.16534	1	0.932	1.61e-74	12:LNd	pros
1.02e-53	-1.78059	0.457	0.789	1.62e-49	12:LNd	Mmp2
4.54e-48	0.525219	0.37	0.018	7.21e-44	12:LNd	CR44663
1.22e-47	-1.60398	0.787	0.908	1.93e-43	12:LNd	VGlut
6.22e-39	-1.26725	0.283	0.727	9.89e-35	12:LNd	beat-Ia
1.29e-37	-1.79819	0.937	0.92	2.05e-33	12:LNd	AstC
5.23e-37	-1.20316	0.772	0.912	8.31e-33	12:LNd	CG45263
7.79e-37	1.01859	0.992	0.963	1.24e-32	12:LNd	fru
1.06e-35	-1.15834	0.929	0.976	1.68e-31	12:LNd	rad
3.99e-30	1.02943	0.906	0.539	6.34e-26	12:LNd	Tsp66E
8.03e-30	1.13612	0.961	0.651	1.28e-25	12:LNd	LpR1
4.38e-28	-1.13815	0.496	0.732	6.97e-24	12:LNd	emc
2.51e-27	1.27805	0.937	0.41	3.99e-23	12:LNd	ct
4.54e-27	-1.08899	0.575	0.807	7.21e-23	12:LNd	dpr9
1.86e-26	-0.87083	1	0.999	2.95e-22	12:LNd	CG2269
8.82e-26	-0.964922	0.37	0.695	1.4e-21	12:LNd	Rfx
7.15e-25	-1.65244	0.906	0.942	1.14e-20	12:LNd	Pdf
1.03e-23	-0.93848	0.646	0.817	1.64e-19	12:LNd	CG34356
2.85e-23	-1.47511	0.638	0.787	4.53e-19	12:LNd	Dh31
2.94e-23	-2.05498	0.52	0.556	4.67e-19	12:LNd	Trissin
2.36e-22	1.00052	0.898	0.457	3.76e-18	12:LNd	dpr10
2.88e-22	0.970493	0.984	0.881	4.58e-18	12:LNd	Ca-alpha1T
3.25e-22	1.08207	0.89	0.524	5.17e-18	12:LNd	CG42674
6.13e-22	-0.826797	0.591	0.803	9.74e-18	12:LNd	hig
1.52e-21	0.917407	0.937	0.654	2.41e-17	12:LNd	CG32700
1.56e-21	-1.19354	0.772	0.832	2.48e-17	12:LNd	CNMa
1.67e-21	0.727353	0.913	0.671	2.65e-17	12:LNd	kek1
7.05e-21	-0.849424	0.504	0.758	1.12e-16	12:LNd	ed
1.22e-20	-0.907409	0.929	0.965	1.95e-16	12:LNd	roX1
1.29e-20	0.619223	0.22	0.086	2.05e-16	12:LNd	CG3777
1.97e-20	-1.02557	0.622	0.762	3.13e-16	12:LNd	CG8861
2.22e-20	-0.918526	0.929	0.937	3.53e-16	12:LNd	CG43729
3.34e-20	-0.887406	0.378	0.654	5.31e-16	12:LNd	fred
4.91e-20	-0.91524	0.748	0.865	7.81e-16	12:LNd	CG15765
6.79e-20	-1.15017	0.528	0.651	1.08e-15	12:LNd	sNPF
1.69e-18	-0.815984	0.85	0.921	2.69e-14	12:LNd	jeb
2.2e-18	1.0254	0.913	0.595	3.49e-14	12:LNd	CG33543
2.92e-18	-1.53846	0.819	0.777	4.64e-14	12:LNd	ITP
3.7e-18	-0.92181	0.638	0.825	5.88e-14	12:LNd	CG4341
1.01e-17	-0.764096	0.669	0.844	1.6e-13	12:LNd	Ktl
2.06e-17	-0.669272	0.535	0.793	3.27e-13	12:LNd	CG34353
2.42e-17	-1.1298	0.732	0.814	3.85e-13	12:LNd	CG43902
3.11e-17	-0.774504	0.496	0.678	4.95e-13	12:LNd	CG34355
1.55e-16	-0.868287	0.236	0.479	2.46e-12	12:LNd	gl
1.87e-16	-0.687979	0.811	0.918	2.98e-12	12:LNd	Dscam4
1.98e-16	0.772721	0.772	0.459	3.14e-12	12:LNd	CadN2
3.77e-16	-1.12804	0.362	0.527	5.99e-12	12:LNd	pdm3
4.83e-16	-0.761556	0.291	0.574	7.67e-12	12:LNd	dpr11
1.32e-15	0.727892	0.583	0.241	2.09e-11	12:LNd	5-HT2A
1.86e-15	-0.799409	0.543	0.633	2.96e-11	12:LNd	CG9650
5.24e-15	-0.68344	0.921	0.965	8.33e-11	12:LNd	mbl
5.67e-15	-1.46159	0.299	0.345	9.01e-11	12:LNd	CCHa1
5.92e-15	0.691846	0.929	0.809	9.41e-11	12:LNd	Cbp53E
8.43e-15	-0.639455	0.504	0.712	1.34e-10	12:LNd	CG12484
1.74e-14	-0.720168	0.244	0.476	2.77e-10	12:LNd	CG6154
2.34e-14	0.59538	0.992	0.933	3.71e-10	12:LNd	CG43737
2.67e-14	0.65251	0.764	0.592	4.25e-10	12:LNd	dpr4
3.77e-14	-1.50434	0.205	0.294	5.99e-10	12:LNd	CG15082
5.75e-14	-0.699141	0.118	0.373	9.14e-10	12:LNd	ham
8.79e-14	-1.05622	0.362	0.445	1.4e-09	12:LNd	Npc2b
9.58e-14	0.496696	1	0.971	1.52e-09	12:LNd	RpL22
1.15e-13	-0.572846	0.835	0.909	1.83e-09	12:LNd	Pdfr
1.52e-13	-0.88983	0.244	0.459	2.41e-09	12:LNd	Rh7
1.57e-13	-0.713393	0.22	0.424	2.49e-09	12:LNd	CG17839
1.66e-13	-0.797409	0.252	0.445	2.63e-09	12:LNd	nrv1
1.96e-13	-0.662391	0.268	0.482	3.11e-09	12:LNd	CG34113
2.82e-13	-0.767077	0.583	0.723	4.49e-09	12:LNd	jdp
3.25e-13	-0.799467	0.315	0.52	5.16e-09	12:LNd	beat-Ic
3.95e-13	-0.683247	0.457	0.627	6.27e-09	12:LNd	beat-IIIc
5.4e-13	0.672706	0.567	0.264	8.58e-09	12:LNd	Best1
6.75e-13	0.686149	0.795	0.52	1.07e-08	12:LNd	uzip
7.07e-13	0.920899	0.976	0.65	1.12e-08	12:LNd	toy
7.81e-13	-0.661094	0.425	0.608	1.24e-08	12:LNd	nord
8.01e-13	-0.835872	0.323	0.511	1.27e-08	12:LNd	CG15537
8.93e-13	0.722555	0.913	0.734	1.42e-08	12:LNd	CG34370
1.01e-12	0.518182	1	0.94	1.6e-08	12:LNd	mub
1.16e-12	-0.600742	0.488	0.705	1.85e-08	12:LNd	Pde1c
1.31e-12	0.333612	1	0.999	2.09e-08	12:LNd	Rdl
1.84e-12	0.604526	1	0.941	2.93e-08	12:LNd	klg
1.89e-12	0.552913	0.969	0.885	3.01e-08	12:LNd	Glut1
2.04e-12	-0.663469	0.661	0.819	3.25e-08	12:LNd	CG42540
3.26e-12	-0.665398	0.291	0.504	5.18e-08	12:LNd	CG31191
3.55e-12	-0.716196	0.866	0.89	5.65e-08	12:LNd	CG34384
4.27e-12	0.472943	0.417	0.116	6.79e-08	12:LNd	MsR1
5.6e-12	-0.680533	0.339	0.613	8.89e-08	12:LNd	CG18265
6e-12	0.799311	0.835	0.461	9.53e-08	12:LNd	nvy
7.03e-12	-0.348078	0.598	0.742	1.12e-07	12:LNd	CG43658
1.13e-11	-0.613036	0.236	0.465	1.8e-07	12:LNd	beat-Ib
1.7e-11	-0.567466	0.244	0.447	2.71e-07	12:LNd	CG13408
1.71e-11	0.681313	0.843	0.539	2.72e-07	12:LNd	pgant2
2.81e-11	0.252109	0.339	0.162	4.46e-07	12:LNd	KP78b
3.08e-11	0.373179	0.866	0.585	4.89e-07	12:LNd	CG13300
5.36e-11	-0.575639	0.417	0.623	8.51e-07	12:LNd	Calx
6.35e-11	-0.645342	0.346	0.525	1.01e-06	12:LNd	CG32204
7.59e-11	-0.648692	0.488	0.596	1.21e-06	12:LNd	eys
1.16e-10	-0.497966	0.937	0.928	1.85e-06	12:LNd	svr
1.28e-10	-0.669182	0.52	0.577	2.03e-06	12:LNd	CG43689
1.62e-10	0.704841	0.843	0.715	2.57e-06	12:LNd	CG15630
2.35e-10	-0.678036	0.882	0.916	3.73e-06	12:LNd	Ggamma30A
3.1e-10	-0.531188	0.181	0.362	4.92e-06	12:LNd	DIP-theta
3.43e-10	-0.571571	0.465	0.653	5.46e-06	12:LNd	CG11317
3.49e-10	-0.512818	0.528	0.644	5.54e-06	12:LNd	CG43373
3.55e-10	-0.547285	0.717	0.84	5.65e-06	12:LNd	CG45002
3.75e-10	0.677641	0.898	0.747	5.97e-06	12:LNd	CG8405
4.65e-10	0.753544	0.748	0.373	7.4e-06	12:LNd	Proc
6.29e-10	-0.491105	0.134	0.313	9.99e-06	12:LNd	CG31183
6.65e-10	0.528493	0.913	0.814	1.06e-05	12:LNd	Ptp99A
6.84e-10	-0.414953	0.661	0.821	1.09e-05	12:LNd	kuz
8.83e-10	-0.489225	0.181	0.423	1.4e-05	12:LNd	CG14669
1.52e-09	0.855175	0.488	0.124	2.41e-05	12:LNd	CG13950
1.52e-09	0.730356	0.709	0.288	2.42e-05	12:LNd	CG8745
1.62e-09	0.561592	0.598	0.344	2.58e-05	12:LNd	Amph
2.07e-09	0.424459	0.709	0.456	3.29e-05	12:LNd	CG11191
2.17e-09	0.436623	0.976	0.941	3.45e-05	12:LNd	Fife
2.23e-09	0.636382	0.913	0.555	3.54e-05	12:LNd	Dh44
2.37e-09	-0.510152	0.181	0.331	3.76e-05	12:LNd	CG31814
2.64e-09	0.689294	0.732	0.467	4.2e-05	12:LNd	CG11221
2.85e-09	-0.42374	0.866	0.906	4.53e-05	12:LNd	slgA
3.87e-09	-0.53177	0.748	0.842	6.15e-05	12:LNd	CG1695
5.32e-09	-1.11938	0.63	0.56	8.45e-05	12:LNd	AstA
5.5e-09	0.392999	0.449	0.275	8.74e-05	12:LNd	CG12096
6.28e-09	-0.514197	0.685	0.811	9.99e-05	12:LNd	CG42260
6.47e-09	-0.45946	0.543	0.693	0.000102848	12:LNd	CG32683
6.72e-09	0.541756	0.756	0.447	0.000106802	12:LNd	CG42673
6.95e-09	0.495953	0.937	0.828	0.000110491	12:LNd	REPTOR
6.97e-09	0.329404	0.89	0.683	0.000110738	12:LNd	kug
7.08e-09	0.502438	0.63	0.365	0.000112484	12:LNd	5-HT2B
7.56e-09	0.463978	0.717	0.498	0.000120118	12:LNd	MYPT-75D
8.17e-09	0.426838	0.961	0.869	0.000129802	12:LNd	Spred
8.77e-09	-0.711613	0.315	0.446	0.000139392	12:LNd	robo3
1.21e-08	-0.541173	0.22	0.372	0.000191902	12:LNd	sNPF-R
1.47e-08	-0.515833	0.394	0.59	0.000233182	12:LNd	CG13594
2.26e-08	-0.529267	0.693	0.803	0.000359897	12:LNd	Ppcs
2.33e-08	-0.62209	0.417	0.538	0.000370753	12:LNd	Pu
2.63e-08	-0.37177	0.11	0.331	0.000418007	12:LNd	CG6685
2.92e-08	-0.437212	0.866	0.899	0.000464176	12:LNd	CG13054
3.36e-08	-0.514559	0.717	0.794	0.000534177	12:LNd	CG42402
3.5e-08	0.511404	0.827	0.658	0.000556443	12:LNd	luna
3.61e-08	-0.476657	0.811	0.833	0.000573813	12:LNd	Dop2R
3.74e-08	-0.35302	0.976	0.974	0.000594442	12:LNd	Syt4
4.17e-08	-0.510312	0.22	0.361	0.000662142	12:LNd	esn
4.56e-08	-0.50916	0.268	0.362	0.000724028	12:LNd	Dop1R2
4.78e-08	0.333806	0.26	0.059	0.000759845	12:LNd	bdl
5.2e-08	-0.42247	0.465	0.574	0.000826476	12:LNd	mspo
5.24e-08	0.532502	0.969	0.904	0.000832434	12:LNd	Pka-R2
5.37e-08	-0.42476	0.126	0.282	0.000853613	12:LNd	FMRFaR
5.89e-08	-0.54921	0.063	0.218	0.000935885	12:LNd	TrpA1
7.54e-08	-0.930287	0.346	0.424	0.00119832	12:LNd	Scp2
8.01e-08	0.477587	0.567	0.344	0.00127249	12:LNd	Pvr
8.63e-08	-0.47459	0.661	0.72	0.00137137	12:LNd	CG42541
8.64e-08	0.46807	0.748	0.523	0.0013738	12:LNd	sns
8.72e-08	-0.439865	0.087	0.256	0.00138547	12:LNd	CG17193
1.12e-07	-0.525567	0.441	0.525	0.00178657	12:LNd	mtt
1.3e-07	-0.462017	0.661	0.788	0.00205869	12:LNd	dpr13
1.37e-07	0.4514	0.622	0.248	0.00217351	12:LNd	Hr51
1.37e-07	0.329688	0.961	0.902	0.00218139	12:LNd	RpLP0
1.62e-07	-0.362551	0.717	0.817	0.00256954	12:LNd	Vha55
1.84e-07	-0.559848	0.795	0.806	0.00291669	12:LNd	Gfrl
1.85e-07	0.448267	0.866	0.674	0.00293921	12:LNd	CG14762
2.05e-07	0.474185	0.835	0.642	0.00326084	12:LNd	sty
2.11e-07	0.314428	1	1	0.00334812	12:LNd	bru-3
2.77e-07	-0.405385	0.039	0.204	0.00440412	12:LNd	CG34136
2.94e-07	0.518639	0.685	0.305	0.00466664	12:LNd	Fkbp14
3.14e-07	-0.41493	0.409	0.577	0.00499007	12:LNd	CG6330
3.42e-07	-0.548271	0.252	0.378	0.00544069	12:LNd	Dh31-R
3.44e-07	-0.435466	0.732	0.756	0.00547465	12:LNd	CG12541
3.69e-07	-0.463097	0.457	0.594	0.00586977	12:LNd	Octbeta2R
4.08e-07	-0.454269	0.26	0.408	0.00648239	12:LNd	CG6959
4.12e-07	-0.438458	0.827	0.863	0.00654055	12:LNd	Pal2
4.15e-07	0.39395	0.685	0.456	0.00659064	12:LNd	CG15894
4.35e-07	0.369574	0.992	0.999	0.00691947	12:LNd	futsch
4.46e-07	0.328211	0.953	0.934	0.00708494	12:LNd	CG9821
4.58e-07	-0.373403	0.165	0.352	0.00727369	12:LNd	ATP8B
5.33e-07	-0.340566	1	0.998	0.00846941	12:LNd	cpx
5.41e-07	0.407996	0.976	0.935	0.00860297	12:LNd	fas
6.22e-07	-0.387956	0.142	0.354	0.0098855	12:LNd	CG13506
6.52e-07	-0.431288	0.394	0.514	0.0103665	12:LNd	Act42A
6.6e-07	-0.388947	0.055	0.2	0.0104857	12:LNd	ap
7.01e-07	-0.398383	0.559	0.693	0.0111464	12:LNd	B4
7.09e-07	-0.409386	0.843	0.896	0.0112753	12:LNd	CG6024
7.46e-07	0.468756	0.827	0.681	0.0118626	12:LNd	CG34357
8e-07	0.368821	0.283	0.127	0.0127129	12:LNd	CR43464
8.81e-07	0.351434	0.394	0.2	0.0140021	12:LNd	CG31323
9.41e-07	0.473563	0.945	0.831	0.0149583	12:LNd	CG34362
9.96e-07	-0.435108	0.189	0.299	0.0158229	12:LNd	lov
1.01e-06	-0.452101	0.685	0.74	0.0160063	12:LNd	Dyrk2
1.01e-06	0.399037	0.898	0.697	0.0161137	12:LNd	CG9328
1.06e-06	-0.51737	0.339	0.426	0.01678	12:LNd	DIP-beta
1.06e-06	-0.491772	0.724	0.748	0.0168931	12:LNd	CG10384
1.11e-06	0.479096	0.913	0.741	0.0177029	12:LNd	Dscam2
1.17e-06	0.46618	0.583	0.395	0.0186682	12:LNd	mib2
1.25e-06	-0.512429	0.268	0.324	0.0198381	12:LNd	CG1402
1.36e-06	0.470429	0.921	0.723	0.0216753	12:LNd	bi
1.45e-06	0.345934	0.339	0.155	0.0230894	12:LNd	ome
1.49e-06	-0.404979	0.26	0.436	0.02363	12:LNd	Gadd45
1.5e-06	-0.459493	0.268	0.373	0.0238053	12:LNd	CG34347
1.57e-06	0.445363	0.638	0.471	0.0249476	12:LNd	CG17124
1.6e-06	0.530698	0.669	0.463	0.0254307	12:LNd	Oamb
1.67e-06	-0.492316	0.827	0.81	0.0265547	12:LNd	Pdi
1.99e-06	0.622571	0.646	0.465	0.0316336	12:LNd	AstC-R2
2.26e-06	0.345385	0.457	0.254	0.0359799	12:LNd	CG7985
2.43e-06	-0.402052	0.551	0.633	0.0386057	12:LNd	CG3530
2.45e-06	0.536534	0.89	0.661	0.0389002	12:LNd	beat-IV
2.56e-06	0.492288	0.78	0.579	0.0407556	12:LNd	beat-VI
2.8e-06	0.448271	0.748	0.512	0.0444323	12:LNd	LpR2
2.99e-06	0.510258	0.724	0.474	0.0474685	12:LNd	app
3.35e-06	-0.297999	0.638	0.742	0.0533053	12:LNd	Nlg2
3.63e-06	0.35941	0.472	0.322	0.0577227	12:LNd	CR44018
3.63e-06	-0.30415	0.976	0.982	0.0577636	12:LNd	Sdc
3.94e-06	-0.285154	0.094	0.282	0.062693	12:LNd	Gycbeta100B
4.13e-06	-0.321238	0.205	0.38	0.0656745	12:LNd	Hs6st
4.34e-06	-0.305732	0.142	0.311	0.068962	12:LNd	bark
4.48e-06	-0.32258	0.307	0.425	0.0712319	12:LNd	tinc
4.65e-06	-0.479635	0.283	0.434	0.0739544	12:LNd	CG33639
4.94e-06	0.251713	0.976	0.955	0.0784325	12:LNd	RpS29
5.16e-06	-0.316583	0.134	0.293	0.0819668	12:LNd	CG31690
5.5e-06	0.253077	0.252	0.112	0.0874591	12:LNd	RhoGEF2
5.74e-06	-0.42636	0.205	0.291	0.0911948	12:LNd	Nos
5.74e-06	-0.323185	0.087	0.211	0.0912356	12:LNd	dpr20
6.01e-06	-0.327546	0.787	0.887	0.0954648	12:LNd	Tango13
6.04e-06	-0.399756	0.142	0.256	0.0960272	12:LNd	twit
6.09e-06	0.343312	0.362	0.181	0.0967365	12:LNd	CCKLR-17D1
6.11e-06	0.658336	0.244	0.212	0.0970844	12:LNd	Gs2
6.13e-06	0.394352	0.984	0.855	0.0974597	12:LNd	CG7708
6.21e-06	-0.432405	0.22	0.303	0.0987391	12:LNd	Indy
6.31e-06	-0.304031	0.181	0.286	0.1003	12:LNd	Nep1
6.51e-06	-0.410472	0.142	0.241	0.103401	12:LNd	Lac
6.83e-06	-0.312023	0.724	0.747	0.108497	12:LNd	Pkc53E
7.53e-06	0.483303	0.898	0.671	0.119719	12:LNd	Ac13E
9.02e-06	0.320419	1	0.972	0.143344	12:LNd	CR44999
9.16e-06	0.405436	0.953	0.847	0.145654	12:LNd	Pde9
1e-05	-0.310955	0.764	0.851	0.159534	12:LNd	Syngr
1.14e-05	-0.367814	0.205	0.357	0.181593	12:LNd	roX2
1.15e-05	-0.416161	0.449	0.565	0.18299	12:LNd	Toll-6
1.2e-05	0.340666	0.394	0.21	0.190436	12:LNd	CG30463
1.2e-05	-0.286061	0.165	0.26	0.191137	12:LNd	CG34106
1.22e-05	0.265508	0.976	0.958	0.193686	12:LNd	Uhg7
1.23e-05	-0.430336	0.142	0.181	0.195466	12:LNd	slp1
1.27e-05	-0.286468	0.496	0.592	0.201262	12:LNd	zfh2
1.38e-05	-0.254193	1	0.998	0.219486	12:LNd	Sh
1.46e-05	-0.3708	0.024	0.13	0.232673	12:LNd	CG43117
1.53e-05	0.350872	0.559	0.422	0.242958	12:LNd	nuf
1.57e-05	-0.292742	0.134	0.319	0.249556	12:LNd	CG4678
1.73e-05	0.300639	0.85	0.689	0.274325	12:LNd	Lerp
1.8e-05	-0.315767	0.874	0.899	0.286102	12:LNd	Gapdh2
1.88e-05	-0.345181	0.094	0.182	0.298573	12:LNd	opa
1.95e-05	-0.273238	0.024	0.168	0.309163	12:LNd	Gyc-89Db
2.15e-05	0.361188	0.929	0.851	0.341087	12:LNd	norpA
2.23e-05	-0.544303	0.386	0.397	0.354826	12:LNd	Pka-C3
2.29e-05	0.38251	0.441	0.267	0.364282	12:LNd	CG46121
2.3e-05	-0.261417	0.047	0.143	0.364836	12:LNd	shg
2.35e-05	-0.327723	0.252	0.366	0.373093	12:LNd	CG42261
2.42e-05	0.342278	0.724	0.606	0.385023	12:LNd	fz2
2.49e-05	-0.434029	0.252	0.341	0.395306	12:LNd	CG5071
2.5e-05	-0.297276	0.15	0.287	0.397543	12:LNd	DIP-gamma
2.97e-05	0.344294	0.811	0.705	0.471687	12:LNd	AcCoAS
3.03e-05	-0.38718	0.591	0.658	0.480778	12:LNd	CG5549
3.1e-05	-0.319079	0.323	0.464	0.492725	12:LNd	VepD
3.26e-05	-0.42242	0.976	0.944	0.518584	12:LNd	heph
3.51e-05	-0.338019	0.024	0.112	0.557707	12:LNd	CG15394
3.57e-05	-0.336179	0.575	0.655	0.567145	12:LNd	CG43759
3.71e-05	-0.293341	0.102	0.214	0.589269	12:LNd	danr
3.72e-05	0.42385	0.78	0.699	0.590904	12:LNd	Pde8
3.72e-05	-0.28879	0.228	0.389	0.591724	12:LNd	gukh
3.91e-05	0.286977	0.669	0.475	0.62088	12:LNd	CG1648
3.91e-05	0.296235	0.827	0.704	0.622124	12:LNd	CG42346
4.19e-05	-0.324082	0.094	0.253	0.665192	12:LNd	Dat
4.28e-05	-0.302097	0.079	0.187	0.680883	12:LNd	CG10738
4.31e-05	-0.344534	0.929	0.901	0.684704	12:LNd	GluClalpha
4.76e-05	0.333355	0.606	0.436	0.757173	12:LNd	CG4238
4.8e-05	-0.32531	0.244	0.312	0.763147	12:LNd	SIFaR
4.91e-05	0.290955	0.362	0.225	0.781062	12:LNd	CR45332
5.32e-05	0.329248	0.953	0.839	0.845917	12:LNd	Mef2
5.55e-05	-0.531085	0.087	0.135	0.882729	12:LNd	CG13056
5.7e-05	-0.264032	0.85	0.918	0.906396	12:LNd	vig
5.89e-05	-0.295958	0.89	0.9	0.936719	12:LNd	nAChRalpha1
6.19e-05	-0.425555	0.244	0.287	0.984012	12:LNd	cv-2
6.21e-05	0.395046	0.709	0.531	0.986721	12:LNd	cmpy
6.48e-05	0.329761	0.787	0.719	1	12:LNd	CG44837
7.38e-05	0.305933	0.803	0.664	1	12:LNd	plum
7.45e-05	0.350837	0.969	0.9	1	12:LNd	CG43066
7.49e-05	0.369397	0.858	0.713	1	12:LNd	CG34383
7.53e-05	0.332783	0.913	0.908	1	12:LNd	CG4467
7.96e-05	-0.287118	0.921	0.939	1	12:LNd	stai
8.35e-05	-0.2969	0.74	0.797	1	12:LNd	CG43778
8.74e-05	-0.336264	0.142	0.264	1	12:LNd	CG34155
8.84e-05	0.378723	1	0.962	1	12:LNd	Tbh
8.99e-05	-0.269364	0.047	0.145	1	12:LNd	CG15534
9.65e-05	-0.289153	0.756	0.779	1	12:LNd	eIF-4B
0.000100211	-0.30092	0.693	0.774	1	12:LNd	CG12163
0.000105269	-0.274253	0.661	0.694	1	12:LNd	Gdh
0.000107497	-0.356674	0.11	0.223	1	12:LNd	Xport-B
0.000116434	0.355336	0.969	0.89	1	12:LNd	CG13954
0.000123821	-0.336387	0.693	0.714	1	12:LNd	CG13375
0.000125627	-0.366065	0.709	0.741	1	12:LNd	CG32052
0.000138114	0.352925	0.409	0.237	1	12:LNd	CG11566
0.000144064	-0.32394	0.37	0.515	1	12:LNd	CG13743
0.000150316	0.256616	1	0.977	1	12:LNd	Nckx30C
0.00015314	-0.368646	0.276	0.441	1	12:LNd	CG13229
0.000172636	-0.259567	0.764	0.828	1	12:LNd	Nmda1
0.000175216	-0.347862	0.78	0.817	1	12:LNd	CG42389
0.000184402	-0.271161	0.189	0.316	1	12:LNd	glob1
0.000191401	-0.34674	0.37	0.486	1	12:LNd	Oatp30B
0.000195702	-0.302001	0.346	0.439	1	12:LNd	CG17364
0.000208154	0.487814	0.843	0.52	1	12:LNd	DIP-delta
0.000216607	-0.340589	0.354	0.42	1	12:LNd	Pxn
0.000244454	-0.261165	0.299	0.393	1	12:LNd	nkd
0.000246231	0.270475	0.961	0.901	1	12:LNd	HDAC4
0.0002487	-0.271053	0.693	0.782	1	12:LNd	ssx
0.000256814	-0.288696	0.559	0.678	1	12:LNd	chif
0.000270621	-0.293534	0.315	0.45	1	12:LNd	Ptp10D
0.0002727	-0.275242	0.63	0.65	1	12:LNd	Mp
0.000272797	-0.369281	0.528	0.602	1	12:LNd	krz
0.000284178	-0.317848	0.85	0.859	1	12:LNd	CG14509
0.000284522	-0.262896	0.157	0.27	1	12:LNd	CG43795
0.000290326	-0.278474	0.669	0.711	1	12:LNd	CD98hc
0.000299066	0.306182	0.898	0.719	1	12:LNd	CG32647
0.000307673	0.27083	0.992	0.931	1	12:LNd	Syp
0.000320871	-0.27157	0.945	0.944	1	12:LNd	Rab3
0.000334526	-0.369683	0.307	0.367	1	12:LNd	beat-IIa
0.000342841	-0.404249	0.654	0.639	1	12:LNd	mGluR
0.000350589	-0.34079	0.449	0.576	1	12:LNd	CG9705
0.000368041	-0.256443	0.228	0.316	1	12:LNd	stan
0.000381313	0.282402	0.906	0.771	1	12:LNd	5-HT1A
0.000383799	0.329541	0.843	0.747	1	12:LNd	Teh1
0.000399096	-0.325253	0.268	0.405	1	12:LNd	CG4297
0.000418743	0.287956	0.472	0.298	1	12:LNd	unc-5
0.000419886	0.382327	0.961	0.768	1	12:LNd	Bx
0.000420764	0.263619	0.661	0.546	1	12:LNd	RhoGAP93B
0.000421977	0.357381	0.772	0.568	1	12:LNd	sca
0.000433452	0.259213	0.858	0.729	1	12:LNd	CG32486
0.00043354	0.539767	0.669	0.561	1	12:LNd	sr
0.000451295	-0.329034	0.244	0.328	1	12:LNd	CG34371
0.000467273	-0.266328	0.189	0.327	1	12:LNd	Dgk
0.0004699	-0.435378	0.142	0.177	1	12:LNd	Arc1
0.000481179	-0.277175	0.843	0.803	1	12:LNd	tyf
0.000493968	-0.374592	0.559	0.586	1	12:LNd	CG30089
0.00050041	-0.328274	0.346	0.391	1	12:LNd	CG42339
0.000500528	-0.288996	0.268	0.327	1	12:LNd	twz
0.0005067	-0.26945	0.252	0.288	1	12:LNd	Gp210
0.000506761	0.293213	0.606	0.477	1	12:LNd	mAChR-B
0.000514766	-0.269639	0.339	0.467	1	12:LNd	CG7339
0.000541699	-0.309041	0.394	0.514	1	12:LNd	CG31637
0.000543847	-0.250555	0.661	0.771	1	12:LNd	kdn
0.000546622	-0.280731	0.874	0.875	1	12:LNd	Dop1R1
0.0005658	-0.265156	0.244	0.334	1	12:LNd	D19A
0.000582882	0.353078	0.827	0.699	1	12:LNd	wry
0.00060496	0.261525	0.425	0.252	1	12:LNd	CG17691
0.000618126	-0.255202	0.969	0.972	1	12:LNd	Ald
0.000619289	0.352638	0.85	0.774	1	12:LNd	CG5890
0.000625391	-0.416414	0.717	0.701	1	12:LNd	CG42337
0.000648299	-0.281227	0.89	0.939	1	12:LNd	Vha44
0.000686562	-0.262991	0.827	0.85	1	12:LNd	SP2353
0.000700512	-0.29361	0.858	0.846	1	12:LNd	CG42750
0.000703826	-0.274103	0.622	0.7	1	12:LNd	ena
0.000719943	0.290492	0.764	0.534	1	12:LNd	Octbeta1R
0.000746679	0.600858	0.843	0.694	1	12:LNd	CG17777
0.00074773	-0.269758	0.291	0.414	1	12:LNd	Sec22
0.000754813	-0.292519	0.488	0.581	1	12:LNd	Ndae1
0.000843741	-0.263808	0.78	0.826	1	12:LNd	CG32017
0.000872133	-0.519388	0.189	0.182	1	12:LNd	CG15784
0.000880592	-0.310434	0.134	0.194	1	12:LNd	CG4766
0.000922129	-0.257607	0.378	0.503	1	12:LNd	Atg10
0.000923635	-0.282648	0.504	0.617	1	12:LNd	HmgD
0.000943035	0.275021	0.591	0.434	1	12:LNd	CG4393
0.000977549	-0.281641	0.37	0.468	1	12:LNd	dally
0.0011049	-0.293258	0.575	0.617	1	12:LNd	CR44320
0.00115563	0.264247	0.992	0.926	1	12:LNd	ChAT
0.00116382	-0.270627	0.173	0.256	1	12:LNd	Pura
0.0013303	0.262794	0.638	0.563	1	12:LNd	Pde6
0.0014099	-0.272973	0.811	0.845	1	12:LNd	NaPi-III
0.001446	-0.335006	0.236	0.344	1	12:LNd	Irk1
0.00150961	0.296187	0.929	0.907	1	12:LNd	Rbp9
0.00155981	-0.29086	0.598	0.664	1	12:LNd	olf413
0.00169237	-0.259538	0.102	0.186	1	12:LNd	beat-IIb
0.00188062	-0.257278	0.614	0.7	1	12:LNd	CG1943
0.00188976	0.36137	0.906	0.824	1	12:LNd	Hsp70Ba
0.00196029	0.288509	0.386	0.189	1	12:LNd	nerfin-1
0.00197155	0.303982	0.362	0.16	1	12:LNd	dpr16
0.00200282	-0.257248	0.087	0.139	1	12:LNd	Nplp3
0.00209531	-0.376895	0.386	0.438	1	12:LNd	CG15098
0.00214968	-0.255925	0.732	0.818	1	12:LNd	CG9674
0.00215215	-0.26501	0.819	0.853	1	12:LNd	Ten-m
0.00226219	0.256494	1	0.988	1	12:LNd	hth
0.00239757	-0.251025	0.087	0.185	1	12:LNd	Rab32
0.00256961	-0.352096	0.315	0.34	1	12:LNd	CG1504
0.00267641	-0.283704	0.598	0.675	1	12:LNd	nolo
0.0028614	-0.361312	0.543	0.576	1	12:LNd	CrebA
0.00287638	-0.251189	0.362	0.406	1	12:LNd	pdm2
0.00290971	0.253252	0.543	0.432	1	12:LNd	retm
0.00297078	0.395443	0.535	0.595	1	12:LNd	CG15890
0.00308585	0.293178	0.945	0.93	1	12:LNd	Spn
0.00315851	0.374333	0.858	0.804	1	12:LNd	PRL-1
0.00331446	0.307055	0.346	0.301	1	12:LNd	CG5886
0.0034738	-0.343485	0.85	0.787	1	12:LNd	Sytbeta
0.0035599	0.290842	0.504	0.389	1	12:LNd	LRP1
0.00373474	0.257291	0.724	0.705	1	12:LNd	Nhe2
0.00402269	0.27817	0.299	0.164	1	12:LNd	LamC
0.00420732	0.314698	0.52	0.565	1	12:LNd	Diedel3
0.00431413	0.32166	0.646	0.54	1	12:LNd	Pak3
0.00435253	0.328259	0.717	0.514	1	12:LNd	noc
0.0050741	0.350799	0.772	0.615	1	12:LNd	D
0.00517633	-0.37704	0.488	0.465	1	12:LNd	Mitf
0.00518173	-0.265884	0.37	0.465	1	12:LNd	CG3409
0.00528594	-0.251887	0.748	0.773	1	12:LNd	SRPK
0.00547122	-0.257525	0.772	0.768	1	12:LNd	Trpm
0.00580149	0.258723	0.543	0.43	1	12:LNd	put
0.0062231	0.330488	0.181	0.138	1	12:LNd	dpy
0.00666687	0.31028	0.961	0.882	1	12:LNd	Lim1
0.00675441	0.288737	0.244	0.211	1	12:LNd	sog
0.00784024	0.253734	0.898	0.727	1	12:LNd	GluRIB
0.00808353	0.276431	0.984	0.967	1	12:LNd	scyl
0.00815926	0.269308	0.244	0.196	1	12:LNd	disco
0.00900494	0.347951	0.693	0.541	1	12:LNd	Hsp70Bbb
0.00981938	0.308233	0.433	0.332	1	12:LNd	Hsp70Ab
3.9e-124	1.64266	0.658	0.032	6.19e-120	14:DN3	Dr
1.49e-98	1.33308	0.573	0.211	2.37e-94	14:DN3	Ets65A
1.33e-73	1.52484	0.47	0.083	2.11e-69	14:DN3	grn
2.11e-66	1.16835	1	0.982	3.36e-62	14:DN3	Ih
1.49e-56	0.773198	0.402	0.137	2.37e-52	14:DN3	ey
2.33e-52	0.781176	0.368	0.025	3.7e-48	14:DN3	CG18599
2.73e-40	0.635704	0.291	0.057	4.33e-36	14:DN3	svp
1.62e-38	0.580409	0.632	0.407	2.58e-34	14:DN3	oc
1.57e-36	1.52244	0.598	0.311	2.5e-32	14:DN3	CG31814
5.76e-35	-1.10654	0.701	0.907	9.15e-31	14:DN3	CG13054
1.13e-32	0.875853	0.974	0.892	1.8e-28	14:DN3	IscU
1.14e-32	2.36792	0.282	0.177	1.82e-28	14:DN3	CG15784
1.45e-29	0.770431	0.957	0.929	2.31e-25	14:DN3	Hasp
2.59e-29	-0.617693	0.991	0.999	4.11e-25	14:DN3	fax
9.93e-29	-1.1588	0.35	0.696	1.58e-24	14:DN3	cry
1.35e-25	0.498492	0.205	0.011	2.15e-21	14:DN3	CG10939
3.42e-25	-1.08773	0.556	0.764	5.44e-21	14:DN3	CG12541
3.68e-25	-1.54737	0.932	0.94	5.84e-21	14:DN3	Pdf
2.86e-24	-0.815949	0.282	0.661	4.55e-20	14:DN3	Sox21b
4.23e-24	-0.775855	0.974	0.99	6.72e-20	14:DN3	Hipk
4.9e-24	-1.00668	0.786	0.911	7.78e-20	14:DN3	Pdfr
5.38e-24	0.617542	1	1	8.56e-20	14:DN3	FBgn0283548
3.54e-23	-0.999471	0.325	0.636	5.63e-19	14:DN3	D
4.59e-23	-0.621744	0.897	0.978	7.29e-19	14:DN3	Df31
4.39e-22	1.33604	0.991	0.933	6.97e-18	14:DN3	pros
2.66e-21	0.378696	0.171	0.053	4.22e-17	14:DN3	CG18507
3.68e-21	-0.761897	0.923	0.966	5.85e-17	14:DN3	Tbh
4.39e-21	-0.968535	0.684	0.811	6.98e-17	14:DN3	Gfrl
4.56e-21	-0.620646	0.838	0.95	7.25e-17	14:DN3	smt3
5.78e-21	0.689237	0.41	0.195	9.19e-17	14:DN3	CG34351
5.88e-21	-0.84192	0.581	0.822	9.34e-17	14:DN3	Btk29A
9.6e-21	0.806129	0.991	0.945	1.52e-16	14:DN3	CG42613
3.41e-20	0.691234	1	0.982	5.41e-16	14:DN3	nAChRalpha6
3.59e-20	-0.793655	0.838	0.929	5.71e-16	14:DN3	tim
6.79e-20	-0.796394	0.658	0.815	1.08e-15	14:DN3	CG34356
2.38e-19	-2.16787	0.504	0.557	3.78e-15	14:DN3	Trissin
3.76e-19	-0.942257	0.658	0.837	5.98e-15	14:DN3	2mit
4.71e-19	-0.796372	0.419	0.675	7.49e-15	14:DN3	NK7.1
6.17e-19	1.97303	0.214	0.173	9.8e-15	14:DN3	Arc1
6.68e-19	-0.514701	1	1	1.06e-14	14:DN3	Pdp1
7.19e-19	-0.919249	0.59	0.805	1.14e-14	14:DN3	dpr9
1.09e-18	0.439076	0.128	0.032	1.73e-14	14:DN3	CG8620
1.51e-18	0.924574	0.59	0.358	2.41e-14	14:DN3	Sema-2b
2.72e-18	-0.837675	0.538	0.749	4.32e-14	14:DN3	CG32052
6.58e-18	0.450477	0.231	0.049	1.05e-13	14:DN3	crb
6.74e-18	-0.89699	0.658	0.796	1.07e-13	14:DN3	CG42402
6.78e-18	0.890411	0.419	0.135	1.08e-13	14:DN3	TrissinR
8.74e-18	-1.71323	0.761	0.78	1.39e-13	14:DN3	ITP
9.86e-18	-0.830513	0.65	0.847	1.57e-13	14:DN3	vri
1.18e-17	1.04863	0.795	0.508	1.87e-13	14:DN3	mtt
1.67e-17	-0.979032	0.231	0.478	2.66e-13	14:DN3	gl
2.68e-17	0.724864	0.983	0.846	4.26e-13	14:DN3	Pde9
3.39e-17	-0.867307	0.436	0.659	5.39e-13	14:DN3	Clk
3.7e-17	-0.820945	0.598	0.776	5.88e-13	14:DN3	Trpm
4.04e-17	-0.947231	0.171	0.448	6.42e-13	14:DN3	nrv1
5.22e-17	-0.632148	0.94	0.966	8.3e-13	14:DN3	fru
8.01e-17	-0.637357	0.88	0.94	1.27e-12	14:DN3	CG43729
1.08e-16	0.725197	0.863	0.632	1.72e-12	14:DN3	CG6044
1.14e-16	-0.617691	0.889	0.957	1.82e-12	14:DN3	corto
1.21e-16	-0.785827	0.615	0.798	1.92e-12	14:DN3	Sytbeta
1.39e-16	-1.22655	0.812	0.83	2.21e-12	14:DN3	CNMa
1.86e-16	-0.758229	0.248	0.514	2.95e-12	14:DN3	CG4168
2.45e-16	-0.41406	1	1	3.89e-12	14:DN3	pAbp
2.9e-16	0.667006	0.94	0.865	4.61e-12	14:DN3	CG6424
3.5e-16	-0.524685	1	0.999	5.56e-12	14:DN3	Hrb27C
4.85e-16	0.669537	0.923	0.819	7.71e-12	14:DN3	CG32017
5.25e-16	-0.611321	0.863	0.939	8.34e-12	14:DN3	CG43737
6.84e-16	-0.714063	0.795	0.88	1.09e-11	14:DN3	dpr12
9.17e-16	-0.712436	0.915	0.964	1.46e-11	14:DN3	Eip93F
9.2e-16	-0.628967	0.675	0.853	1.46e-11	14:DN3	Mef2
1.17e-15	-0.997467	0.897	0.944	1.85e-11	14:DN3	CG15628
1.23e-15	-0.71124	0.769	0.901	1.96e-11	14:DN3	Hsp23
1.4e-15	0.874023	0.957	0.826	2.22e-11	14:DN3	Dop2R
1.61e-15	-0.711803	0.88	0.964	2.56e-11	14:DN3	CG31221
1.74e-15	-0.498584	0.974	0.986	2.76e-11	14:DN3	cpo
1.98e-15	-0.706985	0.778	0.851	3.14e-11	14:DN3	cwo
2.37e-15	0.783237	0.812	0.677	3.77e-11	14:DN3	kek1
4.14e-15	0.744693	0.581	0.519	6.58e-11	14:DN3	MRP
4.58e-15	-1.2461	0.239	0.451	7.29e-11	14:DN3	CG31705
7.57e-15	-1.28211	0.393	0.444	1.2e-10	14:DN3	Npc2b
1.23e-14	0.931293	0.932	0.707	1.95e-10	14:DN3	jdp
1.44e-14	0.767866	1	0.961	2.29e-10	14:DN3	mbl
1.52e-14	-0.617914	0.974	0.98	2.41e-10	14:DN3	Pka-C1
1.6e-14	-0.632928	0.368	0.61	2.54e-10	14:DN3	nord
1.76e-14	-1.46443	0.308	0.345	2.8e-10	14:DN3	CCHa1
2.06e-14	-0.60404	0.889	0.922	3.28e-10	14:DN3	vib
2.13e-14	-0.653619	0.564	0.768	3.38e-10	14:DN3	Fur1
3.06e-14	0.394691	1	0.999	4.87e-10	14:DN3	Rdl
3.77e-14	0.469526	0.444	0.211	5.99e-10	14:DN3	CR45312
3.92e-14	-0.902589	0.299	0.456	6.24e-10	14:DN3	Rh7
4.46e-14	-0.957258	0.615	0.669	7.1e-10	14:DN3	toy
5.22e-14	0.495884	0.538	0.363	8.3e-10	14:DN3	CG18135
5.55e-14	-0.820134	0.752	0.813	8.81e-10	14:DN3	Pdi
7.17e-14	-0.690723	0.496	0.604	1.14e-09	14:DN3	Rgk2
9.81e-14	-0.773017	0.333	0.583	1.56e-09	14:DN3	CG44153
9.87e-14	0.607848	0.385	0.279	1.57e-09	14:DN3	La
1.27e-13	-0.725757	0.06	0.375	2.02e-09	14:DN3	ham
1.75e-13	0.567815	0.906	0.759	2.78e-09	14:DN3	kdn
1.77e-13	-0.818428	0.402	0.499	2.82e-09	14:DN3	CG42394
1.81e-13	-0.606275	0.966	0.974	2.88e-09	14:DN3	nmo
1.96e-13	0.570261	0.949	0.893	3.11e-09	14:DN3	Snap25
2.26e-13	-0.558723	0.513	0.707	3.59e-09	14:DN3	gem
3.97e-13	-0.474355	0.957	0.978	6.3e-09	14:DN3	brat
4.11e-13	0.638439	0.342	0.209	6.54e-09	14:DN3	NaPi-T
6.25e-13	-0.865167	0.744	0.774	9.94e-09	14:DN3	Mmp2
6.82e-13	-0.652322	0.966	0.985	1.08e-08	14:DN3	chrb
9.84e-13	-0.693278	0.504	0.715	1.56e-08	14:DN3	beat-Ia
1.15e-12	-0.648042	0.641	0.83	1.82e-08	14:DN3	TMS1
1.24e-12	-0.629679	0.65	0.805	1.96e-08	14:DN3	Ppcs
1.55e-12	-0.609938	0.701	0.89	2.46e-08	14:DN3	FBgn0284243
1.72e-12	-0.414652	0.94	0.97	2.73e-08	14:DN3	His4r
2.11e-12	-0.815842	0.436	0.623	3.35e-08	14:DN3	CR44320
2.24e-12	-0.341658	1	1	3.57e-08	14:DN3	Gbeta13F
2.27e-12	0.878433	0.744	0.374	3.61e-08	14:DN3	Proc
3.21e-12	-0.391565	0.889	0.954	5.1e-08	14:DN3	RpS5a
5.76e-12	-0.448782	0.863	0.909	9.16e-08	14:DN3	yps
6.05e-12	-1.02796	0.778	0.779	9.61e-08	14:DN3	Dh31
6.26e-12	-0.684754	0.821	0.861	9.95e-08	14:DN3	CG15765
7.09e-12	-0.390754	0.863	0.953	1.13e-07	14:DN3	RpS19a
7.48e-12	0.48192	0.359	0.155	1.19e-07	14:DN3	ome
7.73e-12	0.877358	0.761	0.42	1.23e-07	14:DN3	ct
8.82e-12	-0.764131	0.581	0.719	1.4e-07	14:DN3	SoxN
9.34e-12	0.499657	0.316	0.075	1.48e-07	14:DN3	CrzR
1.41e-11	0.332687	0.154	0.046	2.24e-07	14:DN3	Mocs1
1.55e-11	-0.530159	0.444	0.557	2.47e-07	14:DN3	CG33143
2.24e-11	-0.455399	1	0.999	3.56e-07	14:DN3	ps
2.66e-11	0.370189	0.162	0.075	4.23e-07	14:DN3	Zasp52
2.76e-11	-0.753338	0.291	0.401	4.38e-07	14:DN3	Pka-C3
3.62e-11	-0.4508	0.735	0.887	5.75e-07	14:DN3	RpS14b
3.7e-11	-0.441704	0.88	0.951	5.89e-07	14:DN3	RpS13
3.8e-11	0.525506	0.47	0.165	6.05e-07	14:DN3	FBgn0285955
4.07e-11	-0.498762	0.624	0.796	6.47e-07	14:DN3	Cnx99A
4.47e-11	-0.683413	0.496	0.631	7.11e-07	14:DN3	side
5.78e-11	-0.392716	0.923	0.939	9.19e-07	14:DN3	mt:ND3
5.94e-11	-0.45233	0.795	0.92	9.44e-07	14:DN3	RpL17
6.89e-11	-0.523486	0.299	0.581	1.09e-06	14:DN3	sn
7.13e-11	-0.384354	0.974	0.989	1.13e-06	14:DN3	hth
7.33e-11	-0.604997	0.162	0.412	1.16e-06	14:DN3	CG6959
7.81e-11	0.505468	0.222	0.073	1.24e-06	14:DN3	CG18213
8.02e-11	-0.916683	0.35	0.446	1.27e-06	14:DN3	Thor
8.06e-11	-0.404899	0.991	0.997	1.28e-06	14:DN3	Appl
1.01e-10	-0.691224	0.376	0.54	1.61e-06	14:DN3	Pu
1.06e-10	-0.413923	0.966	0.983	1.68e-06	14:DN3	CG6770
1.11e-10	-0.398774	0.803	0.899	1.77e-06	14:DN3	NFAT
1.36e-10	-0.522162	0.385	0.608	2.16e-06	14:DN3	CngB
1.52e-10	-0.631454	0.718	0.739	2.42e-06	14:DN3	Dyrk2
1.65e-10	-0.479938	0.983	0.982	2.63e-06	14:DN3	alphaTub84B
2.21e-10	-0.48431	0.769	0.815	3.52e-06	14:DN3	kuz
2.24e-10	-0.692372	0.479	0.625	3.56e-06	14:DN3	beat-IIIc
2.72e-10	0.95063	0.53	0.311	4.32e-06	14:DN3	CG1402
3.59e-10	-1.06537	0.513	0.566	5.7e-06	14:DN3	AstA
3.6e-10	-0.378185	0.932	0.96	5.73e-06	14:DN3	RpS15
3.63e-10	-0.541785	0.65	0.766	5.77e-06	14:DN3	Hsp27
3.69e-10	-0.582703	0.615	0.777	5.86e-06	14:DN3	CG32547
3.82e-10	0.410244	0.991	0.982	6.07e-06	14:DN3	shi
4.16e-10	-0.389406	0.752	0.847	6.6e-06	14:DN3	dpr8
4.25e-10	-0.494276	0.581	0.709	6.75e-06	14:DN3	InR
4.35e-10	-0.703137	0.59	0.63	6.92e-06	14:DN3	CG9650
5.41e-10	0.713936	0.872	0.811	8.59e-06	14:DN3	msi
5.42e-10	-0.432926	0.906	0.929	8.62e-06	14:DN3	Rbp2
5.83e-10	-0.528844	0.538	0.73	9.27e-06	14:DN3	CG34380
5.87e-10	-0.502854	0.359	0.588	9.33e-06	14:DN3	CG8036
6.05e-10	-0.368657	0.974	0.986	9.61e-06	14:DN3	CG32767
6.35e-10	-0.454687	0.504	0.714	1.01e-05	14:DN3	Flo1
6.43e-10	-0.362645	0.897	0.979	1.02e-05	14:DN3	RpS14a
7.3e-10	-0.37562	0.991	0.999	1.16e-05	14:DN3	mt:tRNA:H
8.71e-10	-0.579389	0.316	0.533	1.38e-05	14:DN3	noc
9.37e-10	-0.41406	0.966	0.979	1.49e-05	14:DN3	RpL15
9.44e-10	-0.51496	0.41	0.611	1.5e-05	14:DN3	Akap200
9.48e-10	0.391055	0.128	0.041	1.51e-05	14:DN3	Cyp4p1
1.12e-09	-0.45146	0.821	0.897	1.78e-05	14:DN3	CG6024
1.27e-09	0.280512	0.12	0.044	2.02e-05	14:DN3	Ir76a
1.29e-09	-0.35846	0.991	0.988	2.04e-05	14:DN3	pum
1.31e-09	-0.634836	0.564	0.652	2.08e-05	14:DN3	CG13298
1.38e-09	0.459317	0.932	0.885	2.19e-05	14:DN3	rdgA
1.4e-09	0.418368	1	0.998	2.22e-05	14:DN3	cpx
1.51e-09	-0.583072	0.35	0.58	2.4e-05	14:DN3	CG9705
1.7e-09	-0.403322	0.812	0.873	2.7e-05	14:DN3	mt:ND6
1.8e-09	-0.430513	0.718	0.886	2.86e-05	14:DN3	CG31760
1.9e-09	-0.5788	0.282	0.444	3.01e-05	14:DN3	CG13408
1.96e-09	0.463995	0.556	0.345	3.12e-05	14:DN3	CG18815
2.02e-09	-0.332265	0.974	0.988	3.21e-05	14:DN3	CG31140
2.11e-09	-0.427654	0.085	0.331	3.35e-05	14:DN3	CG6685
2.23e-09	0.428529	0.598	0.473	3.54e-05	14:DN3	CG16833
2.46e-09	-0.52802	0.222	0.428	3.91e-05	14:DN3	Dscam3
2.5e-09	-0.586418	0.205	0.382	3.97e-05	14:DN3	Fas3
2.59e-09	-0.582169	0.581	0.692	4.12e-05	14:DN3	sli
2.8e-09	-0.508263	0.393	0.622	4.44e-05	14:DN3	HmgD
3.16e-09	-0.442473	0.855	0.948	5.02e-05	14:DN3	Tctp
3.21e-09	-0.462565	0.53	0.703	5.1e-05	14:DN3	CG1943
3.32e-09	-0.404102	0.786	0.851	5.27e-05	14:DN3	CG43324
3.43e-09	-0.607647	0.701	0.781	5.46e-05	14:DN3	Bx
3.49e-09	-0.525371	0.658	0.716	5.55e-05	14:DN3	CG13375
3.62e-09	-0.33652	0.923	0.975	5.75e-05	14:DN3	RpL36
3.98e-09	-0.382487	0.991	0.994	6.33e-05	14:DN3	FBgn0285926
4.78e-09	-0.401369	0.829	0.903	7.6e-05	14:DN3	RpS18
4.88e-09	0.683475	0.692	0.349	7.76e-05	14:DN3	beat-IIa
4.95e-09	-0.402287	0.761	0.831	7.86e-05	14:DN3	RpL18
5.06e-09	0.424234	0.419	0.255	8.04e-05	14:DN3	rn
5.2e-09	-0.607044	0.35	0.484	8.26e-05	14:DN3	CG8216
5.64e-09	0.61147	1	0.996	8.97e-05	14:DN3	Hsromega
5.68e-09	-0.449452	0.915	0.927	9.03e-05	14:DN3	mura
5.76e-09	-0.369301	0.795	0.904	9.16e-05	14:DN3	nAChRalpha1
5.91e-09	-0.457657	0.726	0.823	9.39e-05	14:DN3	Rab2
5.95e-09	-0.47708	0.923	0.976	9.45e-05	14:DN3	rad
5.97e-09	-0.512397	0.06	0.245	9.48e-05	14:DN3	Lac
6.31e-09	0.619388	0.966	0.834	0.000100215	14:DN3	CR40469
6.57e-09	-0.454659	0.538	0.691	0.000104391	14:DN3	FBgn0285952
6.64e-09	-0.335141	0.957	0.984	0.000105522	14:DN3	RpS3
6.84e-09	-0.450838	0.034	0.289	0.00010865	14:DN3	CG13560
7.54e-09	-0.767975	0.726	0.873	0.000119818	14:DN3	CG15312
7.87e-09	-0.320613	0.966	0.972	0.000125085	14:DN3	chic
8.2e-09	-0.461188	0.444	0.675	0.000130286	14:DN3	tsr
8.27e-09	-0.435813	0.709	0.831	0.000131477	14:DN3	Ef1gamma
8.64e-09	-0.319191	0.983	0.997	0.000137305	14:DN3	Ef1alpha100E
8.99e-09	-0.400995	0.085	0.309	0.000142895	14:DN3	CG34105
9.41e-09	-0.608058	0.393	0.516	0.000149541	14:DN3	beat-Ic
9.6e-09	-0.327489	1	0.999	0.000152593	14:DN3	futsch
1.02e-08	-0.278328	1	0.995	0.000162172	14:DN3	28SrRNA-Psi:CR41609
1.06e-08	0.294181	0.154	0.038	0.000169151	14:DN3	CG14937
1.08e-08	-0.475906	0.889	0.924	0.000171095	14:DN3	Nrg
1.11e-08	-0.559001	0.154	0.331	0.000175653	14:DN3	Fkbp14
1.18e-08	-0.58374	0.726	0.717	0.000186783	14:DN3	CG42541
1.2e-08	-0.382893	0.675	0.835	0.000190552	14:DN3	Rho1
1.26e-08	-0.352608	0.949	0.98	0.000199907	14:DN3	Rtnl1
1.36e-08	-0.402938	0.957	0.971	0.000215622	14:DN3	Mid1
1.47e-08	-0.486282	0.308	0.451	0.000233502	14:DN3	CG32521
1.5e-08	-0.385577	0.949	0.965	0.000239144	14:DN3	CG11486
1.88e-08	-0.547079	0.846	0.861	0.000298882	14:DN3	CG7708
1.95e-08	0.447341	0.991	0.978	0.000310124	14:DN3	FBgn0285925
1.97e-08	0.261612	1	0.929	0.000312394	14:DN3	nAChRalpha7
2e-08	-0.528661	0.632	0.76	0.000318422	14:DN3	CG8405
2.06e-08	-0.256238	0.957	0.982	0.000326689	14:DN3	RpLP2
2.07e-08	0.797021	0.556	0.574	0.000329359	14:DN3	Dh44
2.14e-08	-0.34627	0.863	0.939	0.000339854	14:DN3	RpLP1
2.16e-08	-0.765429	0.496	0.52	0.000342905	14:DN3	pdm3
2.2e-08	-0.40075	0.556	0.703	0.000349132	14:DN3	ena
2.34e-08	0.963719	0.231	0.163	0.00037189	14:DN3	ImpL3
2.48e-08	-0.491237	0.444	0.651	0.000393847	14:DN3	Sytalpha
2.55e-08	-0.498439	0.111	0.313	0.000404565	14:DN3	CG31183
2.59e-08	-0.367408	0.769	0.883	0.000411842	14:DN3	CG8726
2.65e-08	0.477967	0.692	0.544	0.000421258	14:DN3	dati
2.8e-08	-0.441554	0.444	0.617	0.000444889	14:DN3	CG14853
2.92e-08	-0.473784	0.453	0.62	0.000464191	14:DN3	Calx
3.15e-08	-0.336297	0.88	0.964	0.000500199	14:DN3	RpL13A
3.16e-08	0.534594	0.308	0.155	0.00050201	14:DN3	Ssrp
3.21e-08	-0.401608	0.641	0.742	0.000509451	14:DN3	Nlg2
3.34e-08	-0.476173	0.068	0.285	0.000530663	14:DN3	hoe1
3.64e-08	-0.448139	0.085	0.274	0.000579264	14:DN3	Hr51
3.69e-08	-0.464234	0.684	0.829	0.000586517	14:DN3	unk
3.73e-08	-1.19969	0.376	0.285	0.000593572	14:DN3	CG15082
3.84e-08	-0.417561	0.111	0.27	0.000610095	14:DN3	CG12730
4.14e-08	0.771563	0.803	0.672	0.000657846	14:DN3	Nplp1
5.34e-08	-0.532572	0.342	0.501	0.00084933	14:DN3	CG31191
5.6e-08	-0.483145	0.342	0.546	0.000889353	14:DN3	gol
5.92e-08	-0.34536	0.821	0.916	0.000941464	14:DN3	RpL32
6.07e-08	-0.480772	0.419	0.575	0.000965339	14:DN3	mspo
6.2e-08	-0.429625	0.795	0.854	0.000984943	14:DN3	Ten-m
6.51e-08	0.532713	0.692	0.554	0.00103409	14:DN3	dpr11
7e-08	-0.326199	0.949	0.966	0.00111309	14:DN3	RpS7
7.05e-08	0.547067	0.735	0.577	0.0011202	14:DN3	CG30089
7.31e-08	-0.47622	0.35	0.491	0.00116217	14:DN3	CG1648
7.39e-08	-0.454502	0.479	0.629	0.00117479	14:DN3	stv
7.72e-08	-0.3806	0.709	0.782	0.0012272	14:DN3	l(1)G0320
8.09e-08	-0.372103	0.915	0.925	0.00128551	14:DN3	Pdcd4
8.63e-08	-0.342051	0.923	0.957	0.00137187	14:DN3	RpS28b
9.47e-08	0.432752	0.949	0.921	0.00150502	14:DN3	nwk
9.9e-08	-0.453976	0.573	0.681	0.00157288	14:DN3	CG3645
1.08e-07	-0.369971	0.607	0.796	0.00171669	14:DN3	Dscam1
1.12e-07	-0.342077	0.846	0.928	0.00177296	14:DN3	RpL40
1.18e-07	-0.405126	0.556	0.766	0.00187821	14:DN3	sea
1.21e-07	-0.533212	0.598	0.707	0.00191589	14:DN3	CG42337
1.24e-07	-0.261976	1	1	0.00197836	14:DN3	mt:ATPase6
1.25e-07	-0.346896	0.846	0.921	0.0019866	14:DN3	RpL26
1.25e-07	-0.333007	0.957	0.973	0.00198716	14:DN3	RpL22
1.27e-07	-0.429565	0.752	0.853	0.00202163	14:DN3	SP2353
1.32e-07	0.314445	0.487	0.295	0.00209571	14:DN3	EndoB
1.58e-07	-0.474236	0.299	0.442	0.0025081	14:DN3	CG15098
1.61e-07	-0.443578	0.53	0.703	0.0025551	14:DN3	CG5174
1.63e-07	-0.461932	0.214	0.345	0.00259386	14:DN3	CG1504
1.65e-07	-0.393458	0.726	0.856	0.0026209	14:DN3	Cp1
1.73e-07	-0.514452	0.171	0.346	0.00274408	14:DN3	Irk1
1.79e-07	-0.345626	0.949	0.965	0.00283803	14:DN3	CG3556
1.91e-07	-0.450635	0.718	0.795	0.00303186	14:DN3	HnRNP-K
2.12e-07	-0.871191	0.812	0.809	0.00337341	14:DN3	CG43902
2.13e-07	-0.439001	0.556	0.655	0.00338007	14:DN3	gprs
2.18e-07	0.841424	0.897	0.922	0.00345876	14:DN3	AstC
2.29e-07	-0.335212	0.932	0.967	0.00363172	14:DN3	RpS3A
2.43e-07	0.409252	0.872	0.793	0.00386578	14:DN3	CG9813
2.44e-07	0.405335	0.547	0.404	0.00387248	14:DN3	RyR
2.54e-07	-0.40618	0.991	0.999	0.00403704	14:DN3	CG2269
2.56e-07	-0.401753	0.581	0.752	0.00407243	14:DN3	Rac1
2.76e-07	0.556604	1	1	0.00439316	14:DN3	Ubx
2.78e-07	-0.306053	0.94	0.964	0.00441473	14:DN3	FBgn0285949
2.79e-07	-0.344652	0.915	0.959	0.00443688	14:DN3	Gdi
2.84e-07	-0.31026	1	0.999	0.00451644	14:DN3	7B2
2.84e-07	-0.380779	0.504	0.657	0.00452079	14:DN3	SkpA
2.95e-07	-0.40463	0.846	0.872	0.00469455	14:DN3	CG18208
3.05e-07	-0.317968	0.846	0.926	0.00485064	14:DN3	RpS11
3.08e-07	-0.382026	0.393	0.583	0.0048982	14:DN3	CG15760
3.13e-07	-0.417725	0.889	0.89	0.00498069	14:DN3	Glut1
3.27e-07	-0.342053	0.632	0.753	0.00519981	14:DN3	Cdc42
3.36e-07	-0.485378	0.496	0.557	0.0053376	14:DN3	pgant2
3.37e-07	-0.408499	0.034	0.204	0.0053515	14:DN3	CG34136
3.38e-07	0.397879	0.444	0.281	0.00537282	14:DN3	CG33203
4e-07	0.55792	0.641	0.464	0.00635218	14:DN3	CG34113
4.04e-07	-0.327407	0.872	0.94	0.00642731	14:DN3	fas
4.31e-07	-0.381252	0.521	0.683	0.00685417	14:DN3	fok
4.48e-07	-0.316369	0.821	0.895	0.00711404	14:DN3	RpL11
4.65e-07	-0.493431	0.274	0.424	0.00739788	14:DN3	Pxn
4.67e-07	-0.331591	0.915	0.954	0.00742554	14:DN3	Ric
4.82e-07	0.592972	0.111	0.071	0.00766239	14:DN3	Cyp4p2
4.84e-07	0.388759	0.974	0.94	0.00769134	14:DN3	nAChRbeta1
4.92e-07	-0.484384	0.564	0.694	0.00782454	14:DN3	CG34357
5.05e-07	-0.362534	0.872	0.912	0.00802964	14:DN3	CG43921
5.27e-07	-0.452231	0.496	0.605	0.00836819	14:DN3	CG18265
5.27e-07	-0.436676	0.256	0.405	0.00836962	14:DN3	CG4297
5.45e-07	-0.420649	0.085	0.223	0.00866678	14:DN3	Xport-B
5.58e-07	-0.280542	0.974	0.982	0.00886426	14:DN3	RhoGAPp190
6.02e-07	-0.580903	0.556	0.671	0.00956004	14:DN3	PVRAP
6.27e-07	-0.747786	0.47	0.539	0.00995845	14:DN3	DIP-delta
7.11e-07	-0.384843	0.675	0.815	0.0112979	14:DN3	Phm
7.18e-07	-0.34047	0.692	0.793	0.0114037	14:DN3	E2f1
7.34e-07	-0.356655	0.778	0.817	0.0116697	14:DN3	Hsp26
7.35e-07	-0.454673	0.735	0.871	0.0116773	14:DN3	CG1275
8.19e-07	-0.357438	0.846	0.87	0.013018	14:DN3	vsg
8.21e-07	-0.341559	0.59	0.726	0.0130528	14:DN3	CG13551
8.67e-07	-0.301588	0.812	0.902	0.0137871	14:DN3	RpS16
8.83e-07	-0.344455	0.256	0.395	0.0140308	14:DN3	nkd
9.34e-07	-0.362577	0.521	0.663	0.0148506	14:DN3	BicD
9.62e-07	-0.320252	0.829	0.863	0.0152834	14:DN3	l(1)G0289
9.99e-07	-0.358181	0.718	0.783	0.0158805	14:DN3	pod1
1e-06	0.409909	0.974	0.936	0.0159257	14:DN3	Syn
1.01e-06	0.384587	0.974	0.948	0.0160452	14:DN3	CG4587
1.02e-06	-0.315737	0.726	0.797	0.0161679	14:DN3	CG42265
1.02e-06	-0.503211	0.735	0.777	0.0162342	14:DN3	Ddc
1.09e-06	-0.290546	0.855	0.912	0.0172715	14:DN3	RpL10Ab
1.12e-06	-0.306416	0.974	0.974	0.0178579	14:DN3	CG43783
1.2e-06	-0.383742	0.462	0.552	0.0190563	14:DN3	rgn
1.22e-06	0.42089	0.821	0.739	0.0194581	14:DN3	CG34114
1.26e-06	-0.260932	0.957	0.986	0.0200363	14:DN3	FBgn0284245
1.35e-06	0.494164	0.906	0.862	0.021406	14:DN3	NaCP60E
1.36e-06	-0.351809	0.214	0.402	0.0215465	14:DN3	kuk
1.37e-06	-0.311451	0.735	0.904	0.0217017	14:DN3	RpS24
1.39e-06	-0.493015	0.103	0.216	0.0220448	14:DN3	TrpA1
1.39e-06	0.316927	0.735	0.621	0.0221446	14:DN3	comt
1.56e-06	-0.40364	0.829	0.877	0.024763	14:DN3	Dop1R1
1.63e-06	-0.304492	0.932	0.944	0.0258383	14:DN3	RpS20
1.63e-06	-0.441533	0.556	0.657	0.0259169	14:DN3	Pdk1
1.77e-06	-0.377903	0.342	0.487	0.0281382	14:DN3	Oatp30B
1.79e-06	0.40546	0.436	0.43	0.0285226	14:DN3	CG42637
1.82e-06	0.313493	0.966	0.941	0.0289329	14:DN3	Tomosyn
1.84e-06	-0.373046	0.855	0.889	0.0292588	14:DN3	arm
1.84e-06	0.472684	0.171	0.163	0.0292658	14:DN3	Trh
1.92e-06	-0.36775	0.538	0.684	0.0305675	14:DN3	Stat92E
1.94e-06	-0.316546	0.863	0.915	0.0308661	14:DN3	rdgB
1.98e-06	0.440974	0.641	0.476	0.0314085	14:DN3	mAChR-B
2e-06	-0.416557	0.761	0.841	0.0317526	14:DN3	Nep3
2.07e-06	-0.295642	0.376	0.516	0.0328835	14:DN3	maf-S
2.11e-06	-0.407472	0.402	0.551	0.0334594	14:DN3	Hsp68
2.18e-06	-0.368968	0.479	0.679	0.0346882	14:DN3	FK506-bp2
2.28e-06	-0.361009	0.786	0.871	0.0362284	14:DN3	VhaAC45
2.36e-06	-0.436026	0.205	0.346	0.0374944	14:DN3	Tdc2
2.36e-06	0.430176	0.427	0.292	0.0375058	14:DN3	CG9253
2.42e-06	0.419199	0.274	0.146	0.0385192	14:DN3	mus201
2.44e-06	-0.320115	0.94	0.963	0.0388089	14:DN3	RpL7A
2.46e-06	0.303844	0.419	0.281	0.03916	14:DN3	CG12994
2.52e-06	-0.253856	0.957	0.963	0.0400875	14:DN3	Alk
2.53e-06	-0.356414	0.12	0.292	0.0402313	14:DN3	GILT1
2.64e-06	-0.373438	0.462	0.608	0.0419438	14:DN3	TfIIA-S
2.65e-06	-0.398303	0.607	0.693	0.0421188	14:DN3	kek6
2.65e-06	-0.345666	0.342	0.571	0.0421348	14:DN3	mt:ND4
2.71e-06	-0.331333	0.872	0.926	0.0430068	14:DN3	CG3800
2.75e-06	0.598137	0.564	0.421	0.0437049	14:DN3	CG33639
2.95e-06	-0.389516	0.863	0.892	0.0468288	14:DN3	Pka-R1
2.97e-06	-0.360162	0.556	0.678	0.0471558	14:DN3	chif
2.99e-06	-0.382562	0.359	0.507	0.0474891	14:DN3	Sik3
3.03e-06	-0.474671	0.547	0.613	0.0481131	14:DN3	CG33543
3.09e-06	-0.367017	0.299	0.471	0.0490864	14:DN3	Gp93
3.09e-06	-0.314081	0.222	0.349	0.0491202	14:DN3	ATP8B
3.12e-06	0.252149	0.248	0.18	0.0495219	14:DN3	CG12177
3.29e-06	-0.314293	0.282	0.459	0.0522561	14:DN3	dmpd
3.33e-06	-0.415482	0.291	0.41	0.0528622	14:DN3	CG10947
3.33e-06	0.316123	0.991	0.898	0.0528851	14:DN3	CG10804
3.39e-06	-0.300784	0.872	0.908	0.0537999	14:DN3	tral
3.49e-06	-0.351175	0.667	0.728	0.0553908	14:DN3	qtc
3.57e-06	-0.386606	0.436	0.565	0.0568019	14:DN3	CG16721
3.59e-06	-0.303651	0.786	0.906	0.0571248	14:DN3	RpL39
3.62e-06	-0.363906	0.692	0.797	0.0574587	14:DN3	Pis
3.79e-06	-0.350455	0.026	0.13	0.0602743	14:DN3	CG43117
3.8e-06	-0.276846	0.581	0.707	0.0603904	14:DN3	CG12484
3.94e-06	-0.268421	0.906	0.958	0.0626611	14:DN3	Cyp1
4.18e-06	-0.34967	0.906	0.959	0.0663797	14:DN3	igl
4.28e-06	0.410139	0.897	0.809	0.0680247	14:DN3	CG9674
4.31e-06	0.346561	0.333	0.197	0.0684886	14:DN3	Pex14
4.51e-06	-0.389907	0.35	0.473	0.0717567	14:DN3	CG17646
4.62e-06	-0.413123	0.376	0.515	0.0734324	14:DN3	Act42A
4.88e-06	-0.418061	0.444	0.584	0.0776175	14:DN3	sca
4.91e-06	0.399251	0.333	0.283	0.0780352	14:DN3	CG31690
4.91e-06	-0.271835	0.974	0.975	0.0780468	14:DN3	CanA-14F
5.02e-06	-0.370807	0.496	0.63	0.0798474	14:DN3	Hrb87F
5.07e-06	-0.443661	0.803	0.805	0.0805825	14:DN3	tyf
5.72e-06	-0.325016	0.701	0.783	0.0909044	14:DN3	MEP-1
5.92e-06	-0.505554	0.598	0.598	0.0941489	14:DN3	krz
6.42e-06	0.289232	0.103	0.043	0.102112	14:DN3	CG18094
6.48e-06	-0.310947	1	0.996	0.103026	14:DN3	Oda
6.63e-06	-0.348144	0.462	0.549	0.105448	14:DN3	Pak3
6.69e-06	-0.343775	0.214	0.347	0.106365	14:DN3	SPR
6.8e-06	-0.297892	0.932	0.944	0.108052	14:DN3	RpL18A
6.96e-06	-0.319173	0.889	0.908	0.110678	14:DN3	eag
7.1e-06	-0.275479	0.316	0.394	0.112868	14:DN3	Ac78C
7.11e-06	-0.353186	0.137	0.281	0.112964	14:DN3	FMRFaR
7.18e-06	-0.331556	0.692	0.783	0.114119	14:DN3	CtsB1
7.21e-06	-0.31806	0.564	0.589	0.114611	14:DN3	zfh2
7.31e-06	-0.405973	0.282	0.381	0.116166	14:DN3	Drl-2
7.42e-06	-0.39332	0.282	0.358	0.117876	14:DN3	esn
7.64e-06	-0.372315	0.376	0.546	0.121473	14:DN3	ergic53
7.66e-06	-0.282328	0.949	0.968	0.121702	14:DN3	RpS23
7.82e-06	-0.269064	0.863	0.938	0.124249	14:DN3	RpS17
7.84e-06	0.481193	0.564	0.43	0.124594	14:DN3	CG43078
7.94e-06	-0.301848	0.487	0.602	0.126241	14:DN3	CG15771
7.95e-06	-0.339899	0.188	0.33	0.126337	14:DN3	CG8372
8.53e-06	-0.321581	0.889	0.894	0.135541	14:DN3	Calr
8.55e-06	-0.475191	0.12	0.182	0.135904	14:DN3	slp1
8.58e-06	-0.362784	0.205	0.253	0.136414	14:DN3	twit
8.63e-06	-0.367907	0.444	0.58	0.137132	14:DN3	Snap24
8.72e-06	0.408367	0.692	0.662	0.138533	14:DN3	Eip63E
8.79e-06	-0.268618	0.077	0.238	0.139639	14:DN3	CG7600
8.93e-06	-0.331666	0.496	0.663	0.141863	14:DN3	Map205
8.93e-06	-0.358549	0.162	0.289	0.141919	14:DN3	sdk
8.96e-06	-0.303182	0.342	0.543	0.142449	14:DN3	CG12384
9.02e-06	-0.348201	0.205	0.299	0.143416	14:DN3	beat-Vc
9.39e-06	-0.449084	0.607	0.705	0.149225	14:DN3	per
9.6e-06	-0.256008	0.897	0.943	0.152552	14:DN3	Galphaq
9.87e-06	-0.314473	0.803	0.868	0.156805	14:DN3	CG11360
1.01e-05	-0.328317	0.376	0.514	0.160845	14:DN3	CG14431
1.01e-05	-0.304578	0.872	0.946	0.160919	14:DN3	Fife
1.01e-05	-0.304546	0.667	0.761	0.160988	14:DN3	Aps
1.05e-05	-0.372652	0.53	0.59	0.166687	14:DN3	CG13995
1.07e-05	-0.367574	0.427	0.62	0.170676	14:DN3	Men
1.08e-05	-0.337575	0.803	0.846	0.171684	14:DN3	zip
1.09e-05	-0.334302	0.197	0.315	0.17286	14:DN3	glob1
1.15e-05	-0.251805	0.769	0.837	0.183009	14:DN3	CG45002
1.19e-05	-0.324068	0.692	0.756	0.188949	14:DN3	2020-09-04
1.2e-05	-0.308555	0.111	0.231	0.191472	14:DN3	CG32392
1.23e-05	-0.302044	0.051	0.176	0.195575	14:DN3	LamC
1.27e-05	0.390172	0.701	0.534	0.202514	14:DN3	Dak1
1.31e-05	-0.335279	0.103	0.181	0.207887	14:DN3	opa
1.36e-05	0.26445	0.265	0.141	0.216447	14:DN3	RpA-70
1.43e-05	-0.284736	0.906	0.937	0.226606	14:DN3	eff
1.44e-05	-0.304211	0.581	0.688	0.22926	14:DN3	CG14762
1.47e-05	-0.334555	0.222	0.343	0.233656	14:DN3	Dif
1.49e-05	-0.416304	0.658	0.684	0.236751	14:DN3	CG42342
1.5e-05	-0.342142	0.829	0.859	0.238015	14:DN3	CG14509
1.55e-05	-0.260083	0.974	0.976	0.24653	14:DN3	elav
1.69e-05	-0.363623	0.607	0.7	0.268996	14:DN3	Atf3
1.75e-05	-0.337419	0.402	0.503	0.277525	14:DN3	puc
1.87e-05	-0.324683	0.795	0.818	0.296591	14:DN3	Nf1
1.93e-05	-0.270934	0.197	0.329	0.307236	14:DN3	hec
1.94e-05	-0.390272	0.419	0.503	0.308991	14:DN3	drl
2e-05	-0.30059	0.974	0.972	0.317511	14:DN3	Hsc70-4
2.04e-05	-0.254676	0.932	0.96	0.32445	14:DN3	RpL41
2.1e-05	0.385149	0.641	0.601	0.334532	14:DN3	DOR
2.19e-05	-0.29284	0.265	0.379	0.348535	14:DN3	eca
2.32e-05	0.308686	0.487	0.32	0.368788	14:DN3	Cisd2
2.46e-05	0.323565	0.453	0.301	0.391378	14:DN3	NnaD
2.48e-05	0.279122	0.291	0.191	0.394528	14:DN3	Gale
2.55e-05	-0.349356	0.547	0.687	0.404527	14:DN3	Uba1
2.55e-05	-0.348054	0.12	0.194	0.405748	14:DN3	CG4766
2.65e-05	-0.344211	0.231	0.445	0.421459	14:DN3	Ost48
2.7e-05	-0.285206	0.368	0.53	0.428929	14:DN3	CG10132
2.72e-05	0.329956	0.188	0.068	0.432952	14:DN3	Ku80
2.73e-05	-0.35163	0.897	0.9	0.43363	14:DN3	chinmo
2.75e-05	-0.250346	0.923	0.978	0.437016	14:DN3	FBgn0285947
2.78e-05	-0.292319	0.949	0.954	0.441396	14:DN3	CG4577
2.98e-05	-0.298339	0.299	0.474	0.473037	14:DN3	CG43222
2.99e-05	-0.344222	0.35	0.458	0.475795	14:DN3	beat-Ib
3.03e-05	-0.266589	0.932	0.957	0.481213	14:DN3	CG42450
3.15e-05	-0.355703	0.718	0.781	0.501229	14:DN3	5-HT1A
3.19e-05	0.338599	0.786	0.77	0.507028	14:DN3	PsGEF
3.25e-05	-0.37842	0.47	0.436	0.515842	14:DN3	Sp1
3.32e-05	-0.26683	0.915	0.934	0.527593	14:DN3	enc
3.35e-05	-0.378401	0.521	0.617	0.532415	14:DN3	Hsp70Bc
3.35e-05	-0.36904	0.932	0.894	0.532628	14:DN3	CG42795
3.58e-05	-0.318733	0.59	0.706	0.568598	14:DN3	nrm
3.59e-05	0.365897	0.615	0.492	0.571222	14:DN3	Atg10
3.6e-05	-0.417968	0.265	0.367	0.571451	14:DN3	GstD1
3.71e-05	-0.260882	0.94	0.965	0.590371	14:DN3	RpL4
3.81e-05	-0.281285	0.308	0.438	0.605856	14:DN3	CG42238
3.87e-05	-0.254512	0.915	0.942	0.615066	14:DN3	mt:ND2
3.87e-05	-0.299706	0.632	0.714	0.615409	14:DN3	AcCoAS
4.03e-05	-0.273491	0.026	0.144	0.640019	14:DN3	shg
4.06e-05	0.333362	0.496	0.42	0.645458	14:DN3	Pih1D1
4.16e-05	-0.316424	0.393	0.537	0.660802	14:DN3	CG5059
4.33e-05	-0.293376	0.41	0.57	0.688166	14:DN3	Acsl
4.44e-05	-0.293137	0.333	0.486	0.706151	14:DN3	Sec61alpha
4.69e-05	-0.314539	0.872	0.906	0.744824	14:DN3	Smox
4.77e-05	-0.323387	0.769	0.858	0.757991	14:DN3	CG7781
4.78e-05	-0.253183	0.863	0.849	0.759733	14:DN3	Amun
4.79e-05	-0.300113	0.821	0.838	0.761667	14:DN3	CG1695
4.97e-05	0.359494	0.496	0.312	0.789323	14:DN3	Dgk
5.06e-05	-0.291259	0.496	0.606	0.803777	14:DN3	Cyt-b5
5.06e-05	-0.462247	0.265	0.377	0.804482	14:DN3	Dh31-R
5.1e-05	-0.313442	0.726	0.802	0.810079	14:DN3	S6k
5.45e-05	-0.479333	0.479	0.579	0.866159	14:DN3	CrebA
5.69e-05	-0.278064	0.795	0.816	0.904004	14:DN3	CG42389
5.88e-05	-0.253209	0.863	0.891	0.934008	14:DN3	Arf79F
5.94e-05	-0.261755	0.53	0.586	0.944103	14:DN3	CG7337
6.03e-05	-0.560726	0.06	0.136	0.958392	14:DN3	CG13056
6.11e-05	-0.307326	0.598	0.764	0.971186	14:DN3	CG16817
6.53e-05	0.26833	0.154	0.094	1	14:DN3	obe
6.69e-05	-0.379508	0.513	0.543	1	14:DN3	CG42674
7.04e-05	-0.256039	0.889	0.93	1	14:DN3	sdt
7.08e-05	-0.305333	0.504	0.551	1	14:DN3	RNaseX25
7.09e-05	-0.252056	0.906	0.942	1	14:DN3	Ubi-p5E
7.28e-05	-0.306224	0.299	0.447	1	14:DN3	CG32485
7.35e-05	-0.263324	0.846	0.885	1	14:DN3	RhoGAP100F
7.37e-05	-0.351582	0.256	0.327	1	14:DN3	twz
7.42e-05	-0.360012	0.188	0.291	1	14:DN3	Nos
7.57e-05	-0.260812	1	1	1	14:DN3	bun
7.59e-05	-0.299074	0.034	0.141	1	14:DN3	CG34247
7.73e-05	-0.354629	0.197	0.356	1	14:DN3	CG9850
7.85e-05	-0.332892	0.427	0.548	1	14:DN3	Sh3beta
7.88e-05	-0.348501	0.547	0.594	1	14:DN3	wake
8e-05	-0.312094	0.88	0.902	1	14:DN3	Fs(2)Ket
8.02e-05	-0.324599	0.675	0.705	1	14:DN3	CG31998
8.09e-05	0.32863	0.299	0.184	1	14:DN3	CG3008
8.28e-05	-0.300202	0.368	0.484	1	14:DN3	CG7115
8.54e-05	-0.366012	0.615	0.645	1	14:DN3	CG11317
8.8e-05	-0.514397	0.427	0.566	1	14:DN3	CG14082
8.81e-05	-0.268098	0.265	0.406	1	14:DN3	CG12213
8.99e-05	0.270969	0.966	0.93	1	14:DN3	flw
9.21e-05	-0.385184	0.282	0.422	1	14:DN3	CG9426
9.31e-05	0.570341	0.684	0.569	1	14:DN3	CG43689
9.4e-05	-0.270174	0.162	0.308	1	14:DN3	CG17271
9.46e-05	-0.286216	0.607	0.633	1	14:DN3	wap
9.86e-05	0.300976	0.991	0.96	1	14:DN3	stnB
0.000100951	-0.373692	0.419	0.595	1	14:DN3	CG8026
0.000107878	-0.299248	0.47	0.66	1	14:DN3	CRMP
0.000113115	0.256838	0.325	0.222	1	14:DN3	phr
0.000116281	-0.293097	0.214	0.327	1	14:DN3	CG11300
0.00012184	-0.323	0.709	0.755	1	14:DN3	Tm1
0.000121929	-0.311874	0.855	0.889	1	14:DN3	Cka
0.00012414	-0.252415	0.214	0.364	1	14:DN3	CG1354
0.00012749	-0.263785	0.632	0.783	1	14:DN3	lark
0.000127592	-0.270475	0.222	0.371	1	14:DN3	Rgl
0.000128232	-0.278606	0.991	0.967	1	14:DN3	scyl
0.000134095	0.28506	0.966	0.926	1	14:DN3	alphaSnap
0.000134341	-0.398507	0.274	0.31	1	14:DN3	CG8745
0.000134455	-0.344453	0.957	0.944	1	14:DN3	klg
0.000134709	-0.258196	0.718	0.834	1	14:DN3	D1
0.000135986	-0.290853	0.761	0.798	1	14:DN3	crp
0.000138862	-0.300444	0.59	0.714	1	14:DN3	CG40045
0.00014358	-0.260702	0.188	0.315	1	14:DN3	Ras64B
0.000148173	-0.278341	0.624	0.683	1	14:DN3	Nlg4
0.000148711	-0.268667	0.12	0.238	1	14:DN3	CG4839
0.000152617	0.41608	0.402	0.172	1	14:DN3	beat-IIb
0.000156475	-0.284971	0.598	0.686	1	14:DN3	CG5554
0.000159048	-0.335062	0.513	0.662	1	14:DN3	CG5549
0.000161018	-0.28834	0.761	0.825	1	14:DN3	hts
0.000161445	-0.30528	0.803	0.743	1	14:DN3	Rab3-GEF
0.00016246	-0.270013	0.615	0.689	1	14:DN3	cact
0.000164271	-0.334834	0.026	0.111	1	14:DN3	CG15394
0.000166121	-0.351379	0.718	0.819	1	14:DN3	Hsp67Ba
0.000172667	-0.310583	0.983	0.927	1	14:DN3	ChAT
0.000173052	-0.279552	0.41	0.56	1	14:DN3	Src64B
0.000173561	0.255693	0.12	0.058	1	14:DN3	fest
0.000176422	-0.315549	0.598	0.691	1	14:DN3	CanB2
0.000177988	-0.280056	0.812	0.835	1	14:DN3	eIF3-S9
0.000184516	-0.375462	0.504	0.485	1	14:DN3	app
0.000185623	-0.385994	0.376	0.536	1	14:DN3	CG12594
0.0001866	0.383922	0.675	0.647	1	14:DN3	Mp
0.000189733	-0.27474	0.162	0.248	1	14:DN3	CG4829
0.000197464	-0.332519	0.94	0.935	1	14:DN3	amon
0.000201494	-0.2853	0.726	0.824	1	14:DN3	CG12071
0.000207532	-0.345828	0.325	0.474	1	14:DN3	beat-Va
0.00020783	-0.251621	0.658	0.683	1	14:DN3	Ac13E
0.000209494	-0.389792	0.239	0.302	1	14:DN3	Indy
0.000211457	-0.72105	0.41	0.421	1	14:DN3	Scp2
0.000219686	0.365093	0.915	0.81	1	14:DN3	Cbp53E
0.000225569	-0.27613	0.436	0.524	1	14:DN3	Kul
0.000226307	-0.334844	0.658	0.75	1	14:DN3	Pkc53E
0.000227871	-0.292005	0.513	0.614	1	14:DN3	CG4768
0.00023061	0.286609	0.957	0.902	1	14:DN3	slgA
0.000233625	0.358537	0.453	0.324	1	14:DN3	Pvf3
0.000233872	-0.275461	0.88	0.897	1	14:DN3	Ubi-p63E
0.000234936	-0.287884	0.197	0.323	1	14:DN3	OstDelta
0.000243126	-0.253913	0.316	0.445	1	14:DN3	CG14764
0.000246769	-0.276713	0.436	0.562	1	14:DN3	Rpn6
0.00024744	-0.260573	0.274	0.441	1	14:DN3	alc
0.00025646	-0.352556	0.718	0.736	1	14:DN3	CG43658
0.000261196	-0.250942	0.855	0.883	1	14:DN3	RpL29
0.000269487	-0.258815	0.692	0.749	1	14:DN3	dco
0.000270557	-0.251598	0.496	0.55	1	14:DN3	CG2924
0.000273007	-0.282717	0.128	0.254	1	14:DN3	CG5916
0.000274878	-0.281397	0.077	0.215	1	14:DN3	danr
0.000277497	-0.256744	0.265	0.305	1	14:DN3	bark
0.000277657	-0.250654	0.145	0.323	1	14:DN3	casp
0.000280898	-0.282374	0.692	0.695	1	14:DN3	Pde1c
0.000281601	-0.263061	0.521	0.568	1	14:DN3	Ptpmeg
0.000303645	-0.268476	0.291	0.339	1	14:DN3	CR43334
0.000305214	0.251285	0.231	0.141	1	14:DN3	ERCC-00035
0.000306851	-0.270722	0.282	0.371	1	14:DN3	Invadolysin
0.000310129	-0.274804	0.641	0.696	1	14:DN3	MFS17
0.000314751	0.351793	0.632	0.622	1	14:DN3	CG31064
0.000314915	-0.255072	0.496	0.63	1	14:DN3	jp
0.000315053	0.285999	0.915	0.897	1	14:DN3	Gapdh2
0.000319516	-0.302269	0.282	0.405	1	14:DN3	CG11050
0.000322276	-0.26672	0.47	0.581	1	14:DN3	Uev1A
0.000341637	-0.269409	0.624	0.72	1	14:DN3	Diap1
0.000342393	-0.338808	0.889	0.931	1	14:DN3	svr
0.000342501	-0.259357	0.316	0.434	1	14:DN3	RhoGAP68F
0.000348677	-0.257507	0.598	0.612	1	14:DN3	fz2
0.000380666	0.253154	0.872	0.809	1	14:DN3	Vha55
0.000386943	0.286913	0.786	0.673	1	14:DN3	Pgi
0.000389195	0.32156	0.667	0.64	1	14:DN3	dpr21
0.000389469	-0.310655	0.094	0.139	1	14:DN3	Nplp3
0.000395985	0.284702	0.863	0.83	1	14:DN3	Teh2
0.000399242	-0.336319	0.291	0.368	1	14:DN3	sNPF-R
0.000409717	-0.271239	0.632	0.736	1	14:DN3	CG2852
0.000411321	-0.278772	0.214	0.308	1	14:DN3	CG5886
0.000448644	-0.26026	0.504	0.616	1	14:DN3	CG12950
0.0004505	-0.324182	0.462	0.503	1	14:DN3	cbt
0.000453171	-0.302671	0.239	0.235	1	14:DN3	Nha2
0.000459429	-0.265467	0.282	0.392	1	14:DN3	fra
0.000464004	-0.301159	0.462	0.629	1	14:DN3	CG14024
0.000467242	-0.286447	0.222	0.362	1	14:DN3	Pdk
0.000475392	-0.284175	0.667	0.799	1	14:DN3	hig
0.00047598	-0.275797	0.487	0.584	1	14:DN3	Dys
0.000481181	-0.282727	0.462	0.582	1	14:DN3	CG42817
0.000485984	-0.303513	0.41	0.543	1	14:DN3	vap
0.0004887	-0.285972	0.094	0.169	1	14:DN3	Nep2
0.000492353	-0.281367	0.598	0.62	1	14:DN3	bru-2
0.000520116	-0.253639	0.342	0.541	1	14:DN3	CG13532
0.000520808	0.3199	0.803	0.657	1	14:DN3	CG42732
0.000521507	-0.255316	0.103	0.184	1	14:DN3	Rab32
0.000533314	-0.266634	0.282	0.455	1	14:DN3	CG14868
0.000544412	-0.302021	0.368	0.468	1	14:DN3	dally
0.000556977	0.257923	1	0.996	1	14:DN3	Syt1
0.000557546	0.266372	0.957	0.923	1	14:DN3	Cadps
0.000580909	-0.270508	0.615	0.653	1	14:DN3	CG42404
0.000599797	-0.274618	0.12	0.193	1	14:DN3	CCHa2-R
0.000611865	-0.250045	0.231	0.444	1	14:DN3	lwr
0.000612323	-0.312317	0.487	0.551	1	14:DN3	Hsp70Bbb
0.000644489	-0.251416	0.205	0.352	1	14:DN3	CG12038
0.000654169	-0.272485	0.923	0.955	1	14:DN3	Hsc70-3
0.000658177	-0.269414	0.385	0.526	1	14:DN3	CG3618
0.000660139	-0.273191	0.47	0.638	1	14:DN3	TER94
0.000671942	-0.348262	0.35	0.426	1	14:DN3	CG30377
0.000704254	-0.290096	0.453	0.598	1	14:DN3	loqs
0.000721372	0.694007	0.786	0.7	1	14:DN3	CG14989
0.00072597	0.348208	0.615	0.578	1	14:DN3	CG15236
0.000747436	-0.282447	0.359	0.51	1	14:DN3	CG4080
0.000748533	-0.250262	0.222	0.345	1	14:DN3	CG33298
0.000763546	-0.251034	0.65	0.708	1	14:DN3	CG5937
0.000764533	-0.40646	0.538	0.5	1	14:DN3	CG15537
0.000823856	-0.253674	0.538	0.643	1	14:DN3	pix
0.000833313	-0.270802	0.581	0.704	1	14:DN3	CR45102
0.000862592	0.387427	0.897	0.812	1	14:DN3	CG4341
0.000877088	0.392965	0.444	0.357	1	14:DN3	btsz
0.00091789	0.446854	0.735	0.665	1	14:DN3	CG32700
0.000954901	-0.279087	0.692	0.73	1	14:DN3	CG11768
0.000959691	-0.289684	0.966	0.967	1	14:DN3	A2bp1
0.000961959	0.272427	0.359	0.266	1	14:DN3	CG17270
0.000973431	0.369407	0.632	0.498	1	14:DN3	CR44029
0.000992613	-0.284092	0.94	0.953	1	14:DN3	HmgZ
0.000994548	-0.253957	0.197	0.273	1	14:DN3	loj
0.000998433	-0.412926	0.564	0.611	1	14:DN3	CG1387
0.000998479	-0.331329	0.479	0.647	1	14:DN3	mGluR
0.00103566	-0.27606	0.521	0.583	1	14:DN3	CG13594
0.00103995	0.293995	0.846	0.789	1	14:DN3	Rop
0.00104032	-0.256808	0.453	0.562	1	14:DN3	GlyP
0.00105808	0.305622	0.282	0.164	1	14:DN3	CG14274
0.00106692	0.257213	0.991	0.917	1	14:DN3	Ggamma1
0.00109461	-0.375467	0.744	0.785	1	14:DN3	Mkp3
0.0011046	-0.259987	0.641	0.74	1	14:DN3	GluRIB
0.00111196	-0.262668	0.581	0.701	1	14:DN3	CG2519
0.00112748	-0.25151	0.795	0.777	1	14:DN3	tws
0.00116498	0.254759	0.419	0.237	1	14:DN3	CG7639
0.0011701	0.305805	0.453	0.36	1	14:DN3	CG1358
0.00122786	-0.279969	0.265	0.359	1	14:DN3	Cdc7
0.001234	-0.302103	0.325	0.45	1	14:DN3	dpr17
0.00124002	0.3219	0.632	0.57	1	14:DN3	CG34394
0.00127849	-0.273466	0.35	0.405	1	14:DN3	CG32243
0.00131978	0.26325	0.991	0.971	1	14:DN3	Ald
0.00132116	-0.278653	0.915	0.952	1	14:DN3	scrt
0.00132178	-0.263964	0.479	0.596	1	14:DN3	NUCB1
0.00132674	-0.291536	0.863	0.788	1	14:DN3	beat-VII
0.00134507	-0.258152	0.598	0.577	1	14:DN3	Fas2
0.00137428	-0.276877	0.231	0.281	1	14:DN3	Best1
0.00137919	0.270497	0.94	0.899	1	14:DN3	Hex-A
0.00141083	-0.283627	0.342	0.428	1	14:DN3	CG6282
0.00146996	-0.266643	0.462	0.606	1	14:DN3	CG31475
0.00153475	-0.322357	0.906	0.913	1	14:DN3	Dscam4
0.00154299	0.288792	0.744	0.647	1	14:DN3	CG43759
0.0015495	-0.26876	0.436	0.462	1	14:DN3	Sec61beta
0.00166916	-0.360686	0.684	0.743	1	14:DN3	CG14207
0.00174698	-0.269544	0.538	0.566	1	14:DN3	Eaf
0.00176506	-0.2826	0.761	0.77	1	14:DN3	CG4502
0.00176671	-0.299024	0.188	0.244	1	14:DN3	Nmdmc
0.00178187	-0.309767	0.564	0.592	1	14:DN3	eys
0.00179099	-0.260062	0.111	0.143	1	14:DN3	CG13950
0.00180425	0.250357	0.564	0.424	1	14:DN3	Eip78C
0.0018099	-0.298814	0.598	0.71	1	14:DN3	wry
0.00182074	0.323655	0.598	0.545	1	14:DN3	Hsp70Bb
0.00182219	-0.358814	0.735	0.756	1	14:DN3	CG8861
0.00182812	-0.317574	0.154	0.252	1	14:DN3	CG17193
0.00184037	-0.279986	0.735	0.75	1	14:DN3	Dscam2
0.00185187	-0.388567	0.265	0.362	1	14:DN3	Dop1R2
0.00185639	-0.279674	0.479	0.521	1	14:DN3	Roc2
0.00186134	-0.257475	0.906	0.911	1	14:DN3	Rab5
0.00188298	-0.292708	0.65	0.673	1	14:DN3	nolo
0.0019415	-0.2636	0.538	0.608	1	14:DN3	CG32506
0.00197491	-0.26277	0.453	0.55	1	14:DN3	Ykt6
0.0019827	-0.256661	0.205	0.289	1	14:DN3	bnb
0.00200022	-0.301165	0.205	0.364	1	14:DN3	CG9135
0.00210265	-0.29078	0.325	0.354	1	14:DN3	DIP-theta
0.00212133	0.279066	0.316	0.214	1	14:DN3	Uhg1
0.00228709	-0.252573	0.41	0.519	1	14:DN3	CG4596
0.00236174	-0.409949	0.385	0.483	1	14:DN3	dpr10
0.00247119	-0.253286	0.402	0.503	1	14:DN3	CR45497
0.00250753	-0.257512	0.342	0.456	1	14:DN3	CG4050
0.00263471	0.841513	0.265	0.321	1	14:DN3	FBgn0013687
0.00297211	-0.334823	0.504	0.547	1	14:DN3	Octbeta1R
0.00307605	0.266766	0.538	0.51	1	14:DN3	mAChR-A
0.00319001	-0.347479	0.47	0.474	1	14:DN3	AstC-R2
0.00338917	-0.271535	0.701	0.781	1	14:DN3	CG5890
0.00343296	-0.269747	0.803	0.882	1	14:DN3	Drat
0.0035206	-0.273681	0.171	0.291	1	14:DN3	Gp210
0.00353805	-0.252816	0.692	0.748	1	14:DN3	Hsp70Aa
0.00354817	0.304651	0.538	0.472	1	14:DN3	CadN2
0.00390163	0.274727	0.983	0.882	1	14:DN3	Ca-alpha1T
0.003964	0.273844	0.812	0.718	1	14:DN3	UbcE2H
0.00417843	-0.25694	0.299	0.379	1	14:DN3	CG31908
0.00418392	0.252278	0.701	0.531	1	14:DN3	CG1317
0.00437626	-0.268256	0.581	0.673	1	14:DN3	ZAP3
0.00524748	-0.35434	0.197	0.251	1	14:DN3	zye
0.00585787	-0.368204	0.906	0.905	1	14:DN3	CG45263
0.00588669	-0.267046	0.573	0.565	1	14:DN3	SC35
0.00590884	-0.480863	0.308	0.345	1	14:DN3	CG5157
0.00623964	-0.363865	0.573	0.594	1	14:DN3	CG11030
0.00631078	0.304514	0.957	0.867	1	14:DN3	tna
0.00636425	-0.303737	0.444	0.475	1	14:DN3	Oamb
0.00676093	0.258967	0.145	0.078	1	14:DN3	CG31897
0.00713132	0.322395	0.821	0.665	1	14:DN3	beat-IV
0.0072607	-0.261933	0.624	0.706	1	14:DN3	Pde8
0.00763599	0.27063	0.872	0.834	1	14:DN3	Ktl
0.00772856	0.255467	0.795	0.707	1	14:DN3	su(w[a])
0.00779779	-0.404798	0.333	0.486	1	14:DN3	nvy
0.00816393	-0.271133	0.701	0.723	1	14:DN3	CG15630
0.00828943	0.250958	0.829	0.788	1	14:DN3	stj
0.00921701	-0.299269	0.265	0.333	1	14:DN3	Vps15
0.00976396	-0.307645	0.291	0.298	1	14:DN3	CG12637
1.66e-269	2.49545	0.895	0.058	2.64e-265	15:DN1p_CNMa	TwdlW
7.3e-112	2.43797	1	0.821	1.16e-107	15:DN1p_CNMa	CNMa
3.6e-102	1.55193	0.816	0.128	5.72e-98	15:DN1p_CNMa	Apoltp
1.03e-81	2.30321	1	0.769	1.64e-77	15:DN1p_CNMa	Dh31
1.77e-57	0.852087	0.491	0.174	2.82e-53	15:DN1p_CNMa	Ekar
7.64e-56	1.43176	0.368	0.026	1.21e-51	15:DN1p_CNMa	CG13071
4.33e-51	-1.32458	0.982	1	6.89e-47	15:DN1p_CNMa	CG2269
2.03e-48	2.55516	0.86	0.369	3.23e-44	15:DN1p_CNMa	Proc
2.3e-46	0.83667	1	0.937	3.66e-42	15:DN1p_CNMa	RpL23
1.79e-44	0.764951	1	0.964	2.84e-40	15:DN1p_CNMa	RpS7
1.23e-43	1.16719	0.982	0.804	1.95e-39	15:DN1p_CNMa	CG42540
1.74e-43	1.16304	0.719	0.203	2.76e-39	15:DN1p_CNMa	CG32392
3.6e-43	1.03835	0.982	0.866	5.72e-39	15:DN1p_CNMa	tna
2.61e-42	1.00743	1	0.848	4.15e-38	15:DN1p_CNMa	norpA
2.32e-39	1.04281	0.991	0.931	3.68e-35	15:DN1p_CNMa	Argk
1.28e-37	0.714335	0.991	0.909	2.04e-33	15:DN1p_CNMa	RpL36A
2.74e-37	0.533658	0.57	0.301	4.36e-33	15:DN1p_CNMa	SP1173
9.59e-37	0.665633	0.991	0.983	1.52e-32	15:DN1p_CNMa	Rim
3.74e-36	0.88875	0.228	0.036	5.95e-32	15:DN1p_CNMa	CG13051
8.14e-36	0.770964	0.982	0.934	1.29e-31	15:DN1p_CNMa	RpLP1
6.45e-35	1.14835	0.649	0.113	1.03e-30	15:DN1p_CNMa	CG34247
8.8e-35	0.733115	1	0.956	1.4e-30	15:DN1p_CNMa	RpL41
9.05e-35	0.751246	0.991	0.961	1.44e-30	15:DN1p_CNMa	RpL7A
5.72e-34	0.685222	0.991	0.928	9.1e-30	15:DN1p_CNMa	RpL12
8.21e-34	0.514173	0.272	0.009	1.3e-29	15:DN1p_CNMa	CG15545
1.53e-33	0.701651	1	0.999	2.43e-29	15:DN1p_CNMa	futsch
3.81e-33	1.31224	0.886	0.578	6.05e-29	15:DN1p_CNMa	eys
5.71e-33	0.991395	0.904	0.64	9.07e-29	15:DN1p_CNMa	sty
7.29e-33	0.680543	1	0.978	1.16e-28	15:DN1p_CNMa	RpS25
1.6e-32	0.668982	1	0.969	2.55e-28	15:DN1p_CNMa	FBgn0285950
7.95e-32	0.71573	1	0.914	1.26e-27	15:DN1p_CNMa	RpL35
9.49e-32	0.682936	1	0.932	1.51e-27	15:DN1p_CNMa	RpS17
3.36e-31	0.688366	0.982	0.962	5.34e-27	15:DN1p_CNMa	FBgn0285949
6.51e-31	0.617527	1	1	1.03e-26	15:DN1p_CNMa	mt:ATPase8
8.98e-31	0.63116	1	0.999	1.43e-26	15:DN1p_CNMa	sgg
1.41e-30	0.68988	1	0.957	2.24e-26	15:DN1p_CNMa	Uhg7
6.27e-30	0.645764	0.991	0.921	9.96e-26	15:DN1p_CNMa	RpL40
1.04e-29	0.641814	1	0.982	1.66e-25	15:DN1p_CNMa	RpS3
1.06e-29	0.695931	0.991	0.973	1.68e-25	15:DN1p_CNMa	RpS27A
1.72e-29	0.675143	0.991	0.966	2.74e-25	15:DN1p_CNMa	RpS23
2.02e-29	1.11256	0.974	0.729	3.22e-25	15:DN1p_CNMa	CG32052
4.97e-29	0.72009	0.991	0.985	7.9e-25	15:DN1p_CNMa	RpL5
5.17e-29	0.619345	0.982	0.908	8.22e-25	15:DN1p_CNMa	RpL32
5.56e-29	0.625408	0.746	0.398	8.84e-25	15:DN1p_CNMa	CR46006
6.4e-29	0.621524	1	0.976	1.02e-24	15:DN1p_CNMa	RpS8
7.3e-29	0.724116	0.947	0.822	1.16e-24	15:DN1p_CNMa	RpL18
2.22e-28	0.345233	0.237	0.009	3.53e-24	15:DN1p_CNMa	CG6362
4.58e-28	1.44715	0.956	0.445	7.27e-24	15:DN1p_CNMa	gl
4.85e-28	0.595346	1	0.972	7.71e-24	15:DN1p_CNMa	RpL36
5.7e-28	0.690545	0.974	0.966	9.05e-24	15:DN1p_CNMa	A2bp1
6.43e-28	0.65994	0.991	0.941	1.02e-23	15:DN1p_CNMa	RpL18A
8.84e-28	0.648878	0.412	0.043	1.41e-23	15:DN1p_CNMa	trp
1.08e-27	0.634642	0.956	0.74	1.72e-23	15:DN1p_CNMa	RpL34b
1.11e-27	0.607109	0.991	0.95	1.76e-23	15:DN1p_CNMa	RpS9
1.17e-27	0.648615	0.982	0.896	1.85e-23	15:DN1p_CNMa	RpS18
1.57e-27	0.874961	0.421	0.164	2.5e-23	15:DN1p_CNMa	CG7191
1.62e-27	0.704558	1	0.942	2.58e-23	15:DN1p_CNMa	RpL7
1.9e-27	0.692846	0.535	0.158	3.03e-23	15:DN1p_CNMa	haf
2.13e-27	0.66694	1	0.966	3.38e-23	15:DN1p_CNMa	RpL10
5.53e-27	1.03348	0.781	0.32	8.79e-23	15:DN1p_CNMa	Tdc2
7.53e-27	0.679831	0.991	0.978	1.2e-22	15:DN1p_CNMa	FBgn0285925
9.3e-27	0.656022	0.965	0.902	1.48e-22	15:DN1p_CNMa	RpS21
1.05e-26	0.723979	1	0.978	1.66e-22	15:DN1p_CNMa	RpL15
1.14e-26	1.22201	1	0.898	1.81e-22	15:DN1p_CNMa	VGlut
1.83e-26	0.571101	0.991	0.964	2.91e-22	15:DN1p_CNMa	RpL24
2.04e-26	0.624871	1	0.981	3.24e-22	15:DN1p_CNMa	CR33222
2.4e-26	0.600864	0.974	0.92	3.82e-22	15:DN1p_CNMa	RpS11
3e-26	0.673731	0.982	0.944	4.77e-22	15:DN1p_CNMa	RpS4
4.06e-26	0.631932	1	0.957	6.46e-22	15:DN1p_CNMa	RpS15
5.42e-26	0.607506	0.982	0.92	8.61e-22	15:DN1p_CNMa	RpL6
6.04e-26	0.598639	1	0.98	9.59e-22	15:DN1p_CNMa	RpLP2
6.97e-26	0.685856	0.789	0.495	1.11e-21	15:DN1p_CNMa	CG14431
7.87e-26	0.621841	0.991	0.954	1.25e-21	15:DN1p_CNMa	RpS28b
1.05e-25	0.638654	0.965	0.907	1.68e-21	15:DN1p_CNMa	RpL10Ab
1.23e-25	0.629307	0.974	0.937	1.95e-21	15:DN1p_CNMa	RpL9
1.32e-25	1.11648	0.588	0.178	2.09e-21	15:DN1p_CNMa	rdo
1.68e-25	1.28926	0.895	0.415	2.67e-21	15:DN1p_CNMa	ct
2e-25	0.613706	1	0.982	3.17e-21	15:DN1p_CNMa	RpL3
2.63e-25	0.643256	0.991	0.915	4.18e-21	15:DN1p_CNMa	RpL35A
2.89e-25	0.653431	1	0.962	4.59e-21	15:DN1p_CNMa	RpL4
4.52e-25	0.547683	0.991	0.957	7.19e-21	15:DN1p_CNMa	RpL14
5.12e-25	0.506172	1	1	8.14e-21	15:DN1p_CNMa	mt:CoII
5.41e-25	0.645495	1	0.91	8.6e-21	15:DN1p_CNMa	RpL17
5.57e-25	0.565858	0.298	0.056	8.86e-21	15:DN1p_CNMa	CG17739
9.41e-25	0.658793	0.991	0.923	1.5e-20	15:DN1p_CNMa	Dhit
1.07e-24	0.699322	1	0.98	1.7e-20	15:DN1p_CNMa	EF2
1.43e-24	1.15545	0.789	0.323	2.28e-20	15:DN1p_CNMa	Ccn
1.51e-24	0.616823	1	0.961	2.4e-20	15:DN1p_CNMa	RpS26
2.65e-24	0.519925	1	1	4.22e-20	15:DN1p_CNMa	mt:CoI
2.97e-24	0.599063	1	0.956	4.72e-20	15:DN1p_CNMa	RpL28
2.97e-24	0.634967	0.991	0.963	4.72e-20	15:DN1p_CNMa	RpS15Aa
3.34e-24	0.594534	1	0.96	5.31e-20	15:DN1p_CNMa	RpS27
3.54e-24	1.06612	0.851	0.518	5.63e-20	15:DN1p_CNMa	Pu
3.78e-24	0.63711	0.956	0.916	6.01e-20	15:DN1p_CNMa	RpL26
4.88e-24	0.606995	0.991	0.974	7.76e-20	15:DN1p_CNMa	RpS14a
9.36e-24	0.620289	1	0.968	1.49e-19	15:DN1p_CNMa	RpL8
1.08e-23	0.637815	0.956	0.795	1.72e-19	15:DN1p_CNMa	RpL30
1.23e-23	0.833807	0.921	0.685	1.96e-19	15:DN1p_CNMa	CG1943
1.31e-23	0.789878	0.746	0.438	2.09e-19	15:DN1p_CNMa	CG30015
1.67e-23	0.724602	0.526	0.163	2.66e-19	15:DN1p_CNMa	Rep
2.65e-23	0.623023	1	0.958	4.21e-19	15:DN1p_CNMa	RpL13A
2.76e-23	0.594925	0.956	0.878	4.38e-19	15:DN1p_CNMa	RpL29
3.28e-23	0.585994	1	1	5.22e-19	15:DN1p_CNMa	mt:ATPase6
3.46e-23	0.385768	0.316	0.106	5.5e-19	15:DN1p_CNMa	CG43155
4.07e-23	0.607496	1	1	6.47e-19	15:DN1p_CNMa	IA-2
4.89e-23	0.614494	0.991	0.894	7.78e-19	15:DN1p_CNMa	RpS16
4.91e-23	0.533366	1	0.974	7.81e-19	15:DN1p_CNMa	FBgn0285947
5.89e-23	0.787067	0.526	0.072	9.37e-19	15:DN1p_CNMa	Gsc
6.48e-23	-1.5932	0.965	0.939	1.03e-18	15:DN1p_CNMa	Pdf
7.01e-23	0.746089	0.912	0.822	1.11e-18	15:DN1p_CNMa	Ef1gamma
9.66e-23	0.700861	0.991	0.984	1.54e-18	15:DN1p_CNMa	FBgn0284245
1.5e-22	0.622014	0.974	0.92	2.38e-18	15:DN1p_CNMa	FBgn0285948
1.82e-22	1.03347	0.965	0.709	2.9e-18	15:DN1p_CNMa	emc
1.89e-22	0.558862	0.991	0.901	3e-18	15:DN1p_CNMa	RpL13
2.02e-22	0.566018	1	0.916	3.21e-18	15:DN1p_CNMa	RpL27
2.26e-22	0.836943	0.991	0.955	3.59e-18	15:DN1p_CNMa	igl
4.07e-22	1.25696	0.64	0.176	6.47e-18	15:DN1p_CNMa	CG34136
4.62e-22	1.00495	0.623	0.361	7.35e-18	15:DN1p_CNMa	Dh31-R
4.69e-22	0.562856	0.991	0.952	7.46e-18	15:DN1p_CNMa	RpS2
7.9e-22	0.492512	1	1	1.26e-17	15:DN1p_CNMa	mt:tRNA:L:CUN
8.34e-22	0.681199	1	0.941	1.33e-17	15:DN1p_CNMa	Tctp
9.02e-22	0.61675	0.965	0.937	1.43e-17	15:DN1p_CNMa	mt:ND3
1.15e-21	-0.864493	0.895	0.963	1.82e-17	15:DN1p_CNMa	CG31221
1.81e-21	1.05232	0.737	0.337	2.87e-17	15:DN1p_CNMa	esn
1.88e-21	0.586243	1	0.946	2.99e-17	15:DN1p_CNMa	RpS19a
2.03e-21	0.580462	1	0.998	3.23e-17	15:DN1p_CNMa	mt:tRNA:H
2.41e-21	0.574894	0.974	0.898	3.83e-17	15:DN1p_CNMa	RpL39
2.74e-21	0.591219	0.658	0.398	4.35e-17	15:DN1p_CNMa	CG5953
3.22e-21	0.629836	1	0.941	5.12e-17	15:DN1p_CNMa	RpS20
3.86e-21	0.519669	1	0.954	6.14e-17	15:DN1p_CNMa	RpS30
5.06e-21	0.565746	0.93	0.857	8.05e-17	15:DN1p_CNMa	RpS12
7.4e-21	0.886906	0.842	0.647	1.18e-16	15:DN1p_CNMa	sra
7.98e-21	0.61569	0.982	0.99	1.27e-16	15:DN1p_CNMa	mt:ND5
8.76e-21	0.785834	0.982	0.926	1.39e-16	15:DN1p_CNMa	svr
9.59e-21	0.597728	0.991	0.949	1.52e-16	15:DN1p_CNMa	RpS5a
1.4e-20	-0.9993	0.684	0.801	2.22e-16	15:DN1p_CNMa	dpr9
1.46e-20	-1.4224	0.939	0.92	2.31e-16	15:DN1p_CNMa	AstC
1.89e-20	0.505481	0.991	0.959	3e-16	15:DN1p_CNMa	RpL37a
2.26e-20	0.463953	1	0.999	3.58e-16	15:DN1p_CNMa	eIF-4a
2.37e-20	0.612168	0.991	0.875	3.76e-16	15:DN1p_CNMa	RpS14b
2.74e-20	0.608153	1	0.979	4.35e-16	15:DN1p_CNMa	Pka-C1
2.81e-20	0.603157	0.86	0.545	4.47e-16	15:DN1p_CNMa	Ef1beta
3.6e-20	0.578333	0.982	0.888	5.72e-16	15:DN1p_CNMa	RpL11
4.11e-20	0.587231	1	0.999	6.53e-16	15:DN1p_CNMa	Ant2
5.04e-20	0.500755	1	0.987	8.01e-16	15:DN1p_CNMa	porin
5.25e-20	0.691648	0.965	0.806	8.34e-16	15:DN1p_CNMa	crc
8.68e-20	0.595754	0.991	0.964	1.38e-15	15:DN1p_CNMa	RpS3A
1.23e-19	0.847595	0.921	0.668	1.96e-15	15:DN1p_CNMa	Rfx
1.33e-19	0.544984	1	0.999	2.12e-15	15:DN1p_CNMa	7B2
1.41e-19	0.588332	0.421	0.168	2.23e-15	15:DN1p_CNMa	CG42700
1.6e-19	0.275876	0.202	0.021	2.54e-15	15:DN1p_CNMa	boss
2.15e-19	0.881236	0.904	0.629	3.42e-15	15:DN1p_CNMa	fred
2.65e-19	0.932869	0.921	0.559	4.21e-15	15:DN1p_CNMa	CG43689
2.69e-19	0.576896	0.518	0.167	4.27e-15	15:DN1p_CNMa	mino
2.79e-19	0.622154	0.947	0.807	4.43e-15	15:DN1p_CNMa	CG9674
3.77e-19	0.629737	0.798	0.603	5.99e-15	15:DN1p_CNMa	Men
4.34e-19	0.501115	0.991	0.954	6.89e-15	15:DN1p_CNMa	RpS29
4.38e-19	0.649384	0.982	0.882	6.96e-15	15:DN1p_CNMa	Lim1
5.14e-19	0.557321	0.895	0.685	8.18e-15	15:DN1p_CNMa	awd
8.01e-19	0.560977	0.904	0.726	1.27e-14	15:DN1p_CNMa	RpS15Ab
9.65e-19	0.826026	0.921	0.792	1.53e-14	15:DN1p_CNMa	Ppcs
1.11e-18	0.592009	0.974	0.939	1.77e-14	15:DN1p_CNMa	mt:ND2
2.02e-18	0.689752	0.798	0.441	3.21e-14	15:DN1p_CNMa	VepD
3.09e-18	0.856269	0.684	0.307	4.9e-14	15:DN1p_CNMa	CG34371
3.23e-18	0.492096	1	1	5.14e-14	15:DN1p_CNMa	bun
4.23e-18	-0.916889	0.974	0.974	6.72e-14	15:DN1p_CNMa	rad
5.11e-18	0.705379	0.377	0.064	8.12e-14	15:DN1p_CNMa	rgr
6.57e-18	0.554916	0.544	0.273	1.04e-13	15:DN1p_CNMa	otk
7.5e-18	0.575144	0.939	0.868	1.19e-13	15:DN1p_CNMa	mt:ND6
8.45e-18	0.534854	0.991	0.946	1.34e-13	15:DN1p_CNMa	RpS13
8.63e-18	0.533748	0.982	0.972	1.37e-13	15:DN1p_CNMa	Ald
8.88e-18	0.95432	0.851	0.577	1.41e-13	15:DN1p_CNMa	beat-VI
9.07e-18	0.676758	0.693	0.425	1.44e-13	15:DN1p_CNMa	CG32066
9.53e-18	0.886998	0.93	0.695	1.51e-13	15:DN1p_CNMa	beat-Ia
1.02e-17	0.535149	0.991	0.954	1.62e-13	15:DN1p_CNMa	Cyp1
1.22e-17	0.478103	0.237	0.055	1.93e-13	15:DN1p_CNMa	CG42534
1.25e-17	0.727931	0.43	0.121	1.99e-13	15:DN1p_CNMa	CG6231
1.34e-17	0.535943	0.991	0.944	2.13e-13	15:DN1p_CNMa	sta
1.42e-17	0.611295	0.465	0.19	2.26e-13	15:DN1p_CNMa	kibra
1.45e-17	0.866957	0.377	0.12	2.3e-13	15:DN1p_CNMa	CG1688
1.66e-17	0.602577	0.956	0.902	2.63e-13	15:DN1p_CNMa	slgA
2.02e-17	0.742556	0.895	0.612	3.22e-13	15:DN1p_CNMa	side
2.28e-17	0.608236	0.991	0.946	3.62e-13	15:DN1p_CNMa	FBgn0284248
2.43e-17	0.522625	1	0.983	3.87e-13	15:DN1p_CNMa	RpL21
2.48e-17	0.500177	0.947	0.894	3.95e-13	15:DN1p_CNMa	RpS24
3.15e-17	0.374289	0.386	0.185	5.01e-13	15:DN1p_CNMa	vn
3.3e-17	0.353817	0.456	0.162	5.25e-13	15:DN1p_CNMa	CG3009
3.5e-17	0.388088	1	0.994	5.56e-13	15:DN1p_CNMa	4EHP
3.99e-17	0.730516	0.842	0.52	6.34e-13	15:DN1p_CNMa	CG5522
4.67e-17	0.286763	0.272	0.18	7.42e-13	15:DN1p_CNMa	Dhc98D
5.75e-17	0.679917	0.851	0.695	9.14e-13	15:DN1p_CNMa	Frq2
5.91e-17	0.648577	0.991	0.914	9.39e-13	15:DN1p_CNMa	jeb
6.06e-17	0.52092	1	0.995	9.63e-13	15:DN1p_CNMa	mt:ND1
8.32e-17	0.422784	1	0.972	1.32e-12	15:DN1p_CNMa	CR44999
9.41e-17	0.814113	0.877	0.805	1.5e-12	15:DN1p_CNMa	CG34356
1.16e-16	0.831306	0.833	0.398	1.85e-12	15:DN1p_CNMa	Pxn
1.34e-16	0.6378	0.895	0.693	2.14e-12	15:DN1p_CNMa	CG12484
1.52e-16	0.998325	0.798	0.489	2.41e-12	15:DN1p_CNMa	CG15537
1.9e-16	0.696083	0.939	0.79	3.02e-12	15:DN1p_CNMa	sick
2.14e-16	0.545579	0.719	0.488	3.41e-12	15:DN1p_CNMa	CG14042
2.15e-16	0.489137	0.965	0.924	3.42e-12	15:DN1p_CNMa	X11Lbeta
2.81e-16	-0.793769	0.711	0.835	4.46e-12	15:DN1p_CNMa	2mit
2.84e-16	-0.878506	0.325	0.653	4.51e-12	15:DN1p_CNMa	CG43373
2.9e-16	0.476436	1	1	4.61e-12	15:DN1p_CNMa	mt:Cyt-b
3.28e-16	-0.651467	0.956	0.982	5.22e-12	15:DN1p_CNMa	Sdc
4.04e-16	1.11698	0.93	0.667	6.42e-12	15:DN1p_CNMa	Nplp1
4.67e-16	0.557612	0.939	0.913	7.43e-12	15:DN1p_CNMa	Rack1
4.95e-16	0.395826	1	1	7.87e-12	15:DN1p_CNMa	28SrRNA-Psi:CR45859
5.78e-16	0.501442	0.965	0.915	9.19e-12	15:DN1p_CNMa	RpL37A
5.86e-16	0.872047	0.991	0.797	9.31e-12	15:DN1p_CNMa	Gfrl
5.98e-16	0.690072	0.991	0.902	9.5e-12	15:DN1p_CNMa	Pdfr
6.54e-16	0.640093	0.553	0.257	1.04e-11	15:DN1p_CNMa	CG42672
7.35e-16	-0.959711	0.289	0.586	1.17e-11	15:DN1p_CNMa	Dh44
9.55e-16	0.384191	0.307	0.075	1.52e-11	15:DN1p_CNMa	otk2
1.12e-15	0.392146	0.158	0.027	1.78e-11	15:DN1p_CNMa	Cpr49Ae
1.15e-15	0.438933	1	0.999	1.82e-11	15:DN1p_CNMa	28SrRNA-Psi:CR45855
1.2e-15	0.957466	0.684	0.275	1.91e-11	15:DN1p_CNMa	lov
1.27e-15	0.764672	0.632	0.33	2.01e-11	15:DN1p_CNMa	CG13506
1.46e-15	0.83069	0.851	0.675	2.32e-11	15:DN1p_CNMa	CG42342
2.35e-15	-0.814289	0.5	0.673	3.74e-11	15:DN1p_CNMa	LpR1
2.54e-15	-1.61284	0.781	0.779	4.03e-11	15:DN1p_CNMa	ITP
2.58e-15	-0.836387	0.798	0.898	4.1e-11	15:DN1p_CNMa	CG13954
2.82e-15	0.693164	0.482	0.058	4.49e-11	15:DN1p_CNMa	DCX-EMAP
4.86e-15	-0.845012	0.912	0.947	7.72e-11	15:DN1p_CNMa	heph
5.27e-15	0.50761	0.965	0.937	8.38e-11	15:DN1p_CNMa	stai
5.78e-15	0.694449	0.833	0.576	9.18e-11	15:DN1p_CNMa	CG8026
5.84e-15	0.529043	0.939	0.846	9.28e-11	15:DN1p_CNMa	Cp1
6.52e-15	0.630996	0.632	0.398	1.04e-10	15:DN1p_CNMa	mrj
8.04e-15	0.394976	1	1	1.28e-10	15:DN1p_CNMa	Gbeta13F
9.87e-15	0.593309	0.842	0.742	1.57e-10	15:DN1p_CNMa	CG32373
1.03e-14	0.480281	0.281	0.084	1.63e-10	15:DN1p_CNMa	CG13875
1.09e-14	0.265401	0.219	0.03	1.73e-10	15:DN1p_CNMa	CG9150
1.16e-14	0.484979	0.93	0.887	1.84e-10	15:DN1p_CNMa	Tet
1.18e-14	0.385255	0.333	0.071	1.88e-10	15:DN1p_CNMa	CG9008
1.18e-14	0.681722	0.667	0.385	1.88e-10	15:DN1p_CNMa	CG14535
1.68e-14	0.292927	0.272	0.125	2.67e-10	15:DN1p_CNMa	Lgr4
2.98e-14	0.776331	0.368	0.238	4.74e-10	15:DN1p_CNMa	Trim9
3e-14	0.6338	0.395	0.14	4.77e-10	15:DN1p_CNMa	bab1
3.03e-14	0.480286	0.956	0.938	4.82e-10	15:DN1p_CNMa	28SrRNA-Psi:CR45853
3.17e-14	0.430763	1	0.996	5.04e-10	15:DN1p_CNMa	Ef1alpha100E
3.2e-14	0.534014	0.605	0.453	5.08e-10	15:DN1p_CNMa	CG3409
3.38e-14	-0.716749	0.544	0.788	5.38e-10	15:DN1p_CNMa	5-HT1A
3.68e-14	0.400081	0.982	0.996	5.84e-10	15:DN1p_CNMa	28SrRNA-Psi:CR41609
3.97e-14	0.363034	1	1	6.31e-10	15:DN1p_CNMa	Atpalpha
4.23e-14	0.498577	0.947	0.869	6.72e-10	15:DN1p_CNMa	sky
5.53e-14	0.516329	0.939	0.885	8.78e-10	15:DN1p_CNMa	arm
6.63e-14	0.915671	0.561	0.284	1.05e-09	15:DN1p_CNMa	Ppa
6.73e-14	0.623611	0.939	0.874	1.07e-09	15:DN1p_CNMa	dpr12
6.74e-14	-0.949408	0.518	0.673	1.07e-09	15:DN1p_CNMa	toy
8.1e-14	0.425364	0.991	0.998	1.29e-09	15:DN1p_CNMa	28SrRNA-Psi:CR40741
8.27e-14	0.429503	0.237	0.064	1.32e-09	15:DN1p_CNMa	CG30460
1.13e-13	-1.25537	0.746	0.812	1.8e-09	15:DN1p_CNMa	CG43902
1.37e-13	0.423453	0.93	0.843	2.17e-09	15:DN1p_CNMa	CG42750
1.57e-13	0.740523	1	0.925	2.49e-09	15:DN1p_CNMa	CG44247
1.6e-13	0.60529	0.912	0.84	2.54e-09	15:DN1p_CNMa	dpr8
1.82e-13	0.454315	0.982	0.996	2.89e-09	15:DN1p_CNMa	28SrRNA-Psi:CR45860
1.84e-13	0.450285	1	0.97	2.92e-09	15:DN1p_CNMa	Hsc70-4
2.36e-13	0.378506	1	1	3.75e-09	15:DN1p_CNMa	Cam
2.44e-13	-0.983247	0.386	0.543	3.88e-09	15:DN1p_CNMa	DIP-delta
2.46e-13	0.693481	0.825	0.497	3.91e-09	15:DN1p_CNMa	CG31345
2.61e-13	0.506199	0.57	0.27	4.15e-09	15:DN1p_CNMa	CG12096
2.84e-13	0.267922	0.947	0.828	4.52e-09	15:DN1p_CNMa	br
3.02e-13	0.529801	0.816	0.555	4.81e-09	15:DN1p_CNMa	HIP
3.12e-13	0.270251	1	1	4.96e-09	15:DN1p_CNMa	pre-rRNA-Psi:CR45856
4.06e-13	0.600083	0.912	0.813	6.46e-09	15:DN1p_CNMa	msn
4.35e-13	-0.767176	0.965	0.985	6.91e-09	15:DN1p_CNMa	chrb
4.86e-13	0.53455	0.833	0.587	7.72e-09	15:DN1p_CNMa	HIP-R
6.14e-13	0.598451	0.237	0.237	9.76e-09	15:DN1p_CNMa	Hug
6.68e-13	-0.606522	0.535	0.745	1.06e-08	15:DN1p_CNMa	Liprin-gamma
6.82e-13	0.606321	0.491	0.295	1.08e-08	15:DN1p_CNMa	bark
6.82e-13	0.903095	0.447	0.227	1.08e-08	15:DN1p_CNMa	Lac
6.99e-13	0.58948	0.737	0.597	1.11e-08	15:DN1p_CNMa	spir
7.53e-13	-0.755764	0.64	0.821	1.2e-08	15:DN1p_CNMa	msi
7.86e-13	0.47441	0.965	0.921	1.25e-08	15:DN1p_CNMa	CG3800
8.39e-13	0.524253	0.974	0.931	1.33e-08	15:DN1p_CNMa	Vha26
9.7e-13	0.449309	0.947	0.758	1.54e-08	15:DN1p_CNMa	Nacalpha
9.89e-13	0.766024	0.895	0.735	1.57e-08	15:DN1p_CNMa	CG34370
1.03e-12	0.567173	0.991	0.982	1.63e-08	15:DN1p_CNMa	alphaTub84B
1.15e-12	0.544322	0.842	0.695	1.83e-08	15:DN1p_CNMa	nrm
1.15e-12	0.304098	0.228	0.064	1.83e-08	15:DN1p_CNMa	ZnT35C
1.19e-12	-0.729867	0.281	0.487	1.88e-08	15:DN1p_CNMa	dpr10
1.3e-12	0.538473	0.702	0.491	2.06e-08	15:DN1p_CNMa	Sik3
1.34e-12	0.649708	0.877	0.415	2.13e-08	15:DN1p_CNMa	nrv1
1.36e-12	0.519447	1	0.903	2.16e-08	15:DN1p_CNMa	yps
2.05e-12	0.739328	0.711	0.306	3.26e-08	15:DN1p_CNMa	CG31814
2.15e-12	0.38511	1	0.999	3.42e-08	15:DN1p_CNMa	FBgn0285944
2.17e-12	0.531936	0.877	0.765	3.45e-08	15:DN1p_CNMa	CG4502
2.58e-12	0.647694	0.667	0.413	4.1e-08	15:DN1p_CNMa	CG6282
2.68e-12	0.429971	0.982	0.944	4.26e-08	15:DN1p_CNMa	smt3
3.09e-12	-0.997544	0.939	0.936	4.91e-08	15:DN1p_CNMa	pros
3.29e-12	0.501518	0.93	0.844	5.23e-08	15:DN1p_CNMa	VhaM8.9
3.31e-12	-1.44242	0.289	0.345	5.26e-08	15:DN1p_CNMa	CCHa1
3.37e-12	0.710614	0.781	0.559	5.36e-08	15:DN1p_CNMa	CG6330
4.05e-12	-0.644877	0.202	0.447	6.43e-08	15:DN1p_CNMa	CG13408
4.22e-12	0.567948	0.991	0.952	6.7e-08	15:DN1p_CNMa	CG4577
4.34e-12	0.693395	0.886	0.743	6.89e-08	15:DN1p_CNMa	Dscam2
4.34e-12	0.628213	0.833	0.424	6.89e-08	15:DN1p_CNMa	CG31705
5.4e-12	0.308494	1	1	8.59e-08	15:DN1p_CNMa	blot
5.64e-12	0.498663	0.588	0.297	8.97e-08	15:DN1p_CNMa	CG4678
6.73e-12	-0.706246	0.272	0.492	1.07e-07	15:DN1p_CNMa	CG9932
7.47e-12	0.322108	0.219	0.078	1.19e-07	15:DN1p_CNMa	CG1572
8.04e-12	0.45751	0.965	0.915	1.28e-07	15:DN1p_CNMa	RpL38
8.82e-12	0.508654	0.991	0.97	1.4e-07	15:DN1p_CNMa	Mid1
8.86e-12	0.633474	0.965	0.856	1.41e-07	15:DN1p_CNMa	Pal2
8.95e-12	0.363578	0.667	0.471	1.42e-07	15:DN1p_CNMa	shn
8.96e-12	0.556685	0.649	0.418	1.42e-07	15:DN1p_CNMa	qm
9.92e-12	0.678535	0.877	0.778	1.58e-07	15:DN1p_CNMa	dpr13
1.09e-11	0.533425	0.579	0.248	1.73e-07	15:DN1p_CNMa	rn
1.13e-11	0.421777	0.535	0.324	1.79e-07	15:DN1p_CNMa	MCTS1
1.14e-11	0.696668	0.754	0.461	1.81e-07	15:DN1p_CNMa	Oamb
1.44e-11	0.50683	0.395	0.114	2.29e-07	15:DN1p_CNMa	CG8771
1.61e-11	0.396905	0.965	0.913	2.56e-07	15:DN1p_CNMa	Vha13
1.74e-11	0.310346	0.307	0.101	2.76e-07	15:DN1p_CNMa	CG11880
1.78e-11	0.488595	0.605	0.343	2.84e-07	15:DN1p_CNMa	Pvr
1.95e-11	0.477738	0.816	0.542	3.09e-07	15:DN1p_CNMa	eIF-3p40
2.21e-11	-0.59972	0.798	0.894	3.51e-07	15:DN1p_CNMa	Glut1
2.25e-11	0.517551	0.86	0.752	3.58e-07	15:DN1p_CNMa	CG16817
2.46e-11	0.600224	1	0.932	3.9e-07	15:DN1p_CNMa	amon
2.46e-11	0.386777	1	0.983	3.91e-07	15:DN1p_CNMa	Act5C
2.54e-11	0.609498	0.535	0.238	4.04e-07	15:DN1p_CNMa	twit
2.55e-11	0.516689	0.86	0.842	4.05e-07	15:DN1p_CNMa	CG9413
2.66e-11	0.461944	0.982	0.89	4.22e-07	15:DN1p_CNMa	Calr
2.96e-11	-0.673286	0.465	0.599	4.71e-07	15:DN1p_CNMa	CG11030
3.03e-11	0.458165	0.93	0.878	4.81e-07	15:DN1p_CNMa	shakB
3.1e-11	0.43669	0.886	0.761	4.92e-07	15:DN1p_CNMa	Sar1
3.34e-11	0.601488	0.842	0.717	5.31e-07	15:DN1p_CNMa	CG14883
3.35e-11	-0.966398	0.64	0.645	5.32e-07	15:DN1p_CNMa	sNPF
3.41e-11	0.406468	1	0.99	5.42e-07	15:DN1p_CNMa	blw
3.62e-11	0.546661	0.921	0.889	5.75e-07	15:DN1p_CNMa	Pka-R1
3.97e-11	0.424971	0.965	0.884	6.31e-07	15:DN1p_CNMa	bic
3.98e-11	0.566011	0.64	0.474	6.32e-07	15:DN1p_CNMa	Rab8
[truncated: 13,043 more rows]
