# Supplementary material for: A transcriptomic taxonomy of Drosophila circadian neurons around the clock
Source: eLife. 2021 Jan 13;10:e63056. doi: 10.7554/eLife.63056 (PMC7837698; doi:10.7554/eLife.63056)
Supplement: Supplementary file 1. — Table displaying the minimum and maximum gene expression level, phase, and p-value for the list of rhythmically expressed genes among clusters in light:dark (LD) and constant darkness (DD) conditions. [file elife-63056-supp1.xlsx]

## Sheet: LD condition
Gene	cluster	F24	phase.F24	F24.p.value	JTK_pvalue	JTK_BH.Q	MAX	MIN	Max.Min	cycling.	Condition
Dh31	1:DN1p_CNMa	0.964604	4.74792	0.0001	4.17942e-59	1.68138e-55	57.2608	4.55871	12.5608	HC_cycler	LD
CG43902	1:DN1p_CNMa	0.953374	2.79692	0.0001	3.5686e-51	7.17823e-48	28.2826	1.73485	16.3026	HC_cycler	LD
Argk	1:DN1p_CNMa	0.979085	2.37175	0.0001	1.02282e-48	1.3716e-45	20.2186	1.25085	16.1639	HC_cycler	LD
tim	1:DN1p_CNMa	0.908424	15.3985	0.0001	5.71484e-44	5.7477e-41	30.2971	1.03033	29.4051	HC_cycler	LD
Pdp1	1:DN1p_CNMa	0.938489	15.4589	0.0001	2.82856e-41	2.27586e-38	112.151	28.2559	3.96914	HC_cycler	LD
pdm3	1:DN1p_CNMa	0.775769	10.611	0.0001	1.23298e-38	8.26716e-36	32.8384	3.33955	9.83316	HC_cycler	LD
CNMa	1:DN1p_CNMa	0.898245	14.7568	0.0005	1.04825e-37	6.02444e-35	72.4119	5.16685	14.0147	HC_cycler	LD
A2bp1	1:DN1p_CNMa	0.877286	13.024	0.0001	6.78859e-36	3.41381e-33	18.8866	3.62594	5.20875	HC_cycler	LD
CG15628	1:DN1p_CNMa	0.900196	11.8596	0.0001	9.88166e-34	4.4171e-31	16.1346	2.11421	7.63153	HC_cycler	LD
CG13054	1:DN1p_CNMa	0.868504	10.3293	0.0001	1.62856e-33	6.55169e-31	16.5969	1.55209	10.6933	HC_cycler	LD
vri	1:DN1p_CNMa	0.931238	11.9937	0.0001	1.0626e-32	3.88624e-30	11.6923	0.510096	22.9217	HC_cycler	LD
SK	1:DN1p_CNMa	0.914674	11.2542	0.0001	3.14648e-32	1.05486e-29	38.5402	6.63313	5.81026	HC_cycler	LD
unc-13-4A	1:DN1p_CNMa	0.839597	11.6033	0.0001	6.27648e-32	1.94233e-29	13.4827	1.69763	7.94209	HC_cycler	LD
Dop1R1	1:DN1p_CNMa	0.871796	12.6341	0.0001	1.23846e-28	3.55879e-26	10.6402	1.2416	8.56975	HC_cycler	LD
sky	1:DN1p_CNMa	0.79323	2.33151	0.0013	7.93828e-27	2.12905e-24	16.4352	1.79566	9.15275	HC_cycler	LD
Lac	1:DN1p_CNMa	0.8306	4.37673	0.0002	3.02871e-26	7.61532e-24	3.59729	0.206345	17.4334	HC_cycler	LD
CG31324	1:DN1p_CNMa	0.955525	13.1031	0.0001	2.96098e-25	7.00706e-23	6.75804	0.261194	25.8736	HC_cycler	LD
Pka-C1	1:DN1p_CNMa	0.793973	4.04889	0.0015	5.36552e-24	1.19919e-21	29.0981	6.3864	4.55627	HC_cycler	LD
CG6329	1:DN1p_CNMa	0.814422	21.5859	0.0014	7.23103e-24	1.53108e-21	16.0257	4.06374	3.94358	HC_cycler	LD
svr	1:DN1p_CNMa	0.830776	4.30409	0.0011	1.37775e-22	2.77135e-20	13.7795	2.87065	4.80012	HC_cycler	LD
CG34356	1:DN1p_CNMa	0.678086	23.7509	0.002	1.6605e-22	3.18105e-20	13.1913	1.35753	9.71711	HC_cycler	LD
emc	1:DN1p_CNMa	0.851768	9.22434	0.0001	6.05974e-22	1.10811e-19	9.65517	2.27497	4.24409	HC_cycler	LD
CG14082	1:DN1p_CNMa	0.842785	10.0139	0.0001	1.19775e-21	2.09501e-19	4.93639	0.140267	35.1929	HC_cycler	LD
CG34347	1:DN1p_CNMa	0.654675	8.78872	0.0012	3.53422e-21	5.92424e-19	5.17259	0.651397	7.94076	HC_cycler	LD
CG30089	1:DN1p_CNMa	0.846021	6.31158	0.0047	5.23413e-21	8.42277e-19	4.47894	0.300252	14.9173	HC_cycler	LD
CG45263	1:DN1p_CNMa	0.873795	17.399	0.0009	1.47654e-20	2.28466e-18	9.15713	2.06174	4.44145	HC_cycler	LD
CG3530	1:DN1p_CNMa	0.88623	2.84083	0.0001	2.22132e-20	3.30977e-18	5.46656	0.955136	5.72333	HC_cycler	LD
nrv1	1:DN1p_CNMa	0.632301	21.2605	0.0014	4.3977e-20	6.31856e-18	4.32874	0.273356	15.8356	HC_cycler	LD
CG43729	1:DN1p_CNMa	0.772945	12.6448	0.0035	8.26433e-20	1.10825e-17	23.1727	6.42072	3.60905	HC_cycler	LD
Clk	1:DN1p_CNMa	0.96802	1.73853	0.0001	8.07773e-20	1.10825e-17	4.62398	0.355509	13.0067	HC_cycler	LD
Nhe2	1:DN1p_CNMa	0.881749	0.593469	0.0001	1.06193e-19	1.37811e-17	3.74641	0.580352	6.45541	HC_cycler	LD
CG32369	1:DN1p_CNMa	0.661445	21.7506	0.0008	1.67136e-19	2.10121e-17	6.05072	0.597733	10.1228	HC_cycler	LD
Dyrk2	1:DN1p_CNMa	0.598443	23.3259	0.0006	6.76515e-19	8.24733e-17	9.12843	0.905002	10.0866	HC_cycler	LD
CG6959	1:DN1p_CNMa	0.79227	16.5686	0.0002	7.89787e-19	9.34504e-17	3.49042	0.100739	34.6482	HC_cycler	LD
CG32333	1:DN1p_CNMa	0.790409	9.91226	0.0001	2.28617e-18	2.62779e-16	2.74378	0.112372	24.417	HC_cycler	LD
Eip93F	1:DN1p_CNMa	0.854004	23.1958	0.0001	4.92336e-18	5.50186e-16	16.2038	3.95842	4.0935	HC_cycler	LD
CG31183	1:DN1p_CNMa	0.826493	12.8807	0.0001	7.63663e-18	8.30328e-16	1.89472	0.0437219	43.3358	HC_cycler	LD
CG9932	1:DN1p_CNMa	0.727654	9.53631	0.0004	1.70928e-17	1.80959e-15	5.39532	0.811836	6.64583	HC_cycler	LD
rdx	1:DN1p_CNMa	0.923859	10.1575	0.0001	1.899e-17	1.95889e-15	9.41108	1.96208	4.79648	HC_cycler	LD
Xport-B	1:DN1p_CNMa	0.803795	12.1359	0.0005	3.41274e-17	3.43236e-15	2.34213	0.189615	12.3521	HC_cycler	LD
Pka-R1	1:DN1p_CNMa	0.887211	5.30543	0.0001	4.33461e-17	4.2532e-15	8.12567	1.78251	4.55856	HC_cycler	LD
CG1648	1:DN1p_CNMa	0.924629	6.6173	0.0001	8.8347e-17	8.46238e-15	2.16484	0.273093	7.92711	HC_cycler	LD
Glut1	1:DN1p_CNMa	0.682631	9.47028	0.002	1.23821e-16	1.15845e-14	9.08194	1.50731	6.02526	HC_cycler	LD
nmo	1:DN1p_CNMa	0.565171	23.7152	0.0063	1.37109e-16	1.25362e-14	29.4847	9.00089	3.27576	HC_cycler	LD
Pkc53E	1:DN1p_CNMa	0.817879	14.9936	0.0006	3.11139e-16	2.78159e-14	4.46834	0.678516	6.58546	HC_cycler	LD
4EHP	1:DN1p_CNMa	0.735033	19.9173	0.0037	4.97971e-16	4.35508e-14	19.7986	5.47225	3.618	HC_cycler	LD
AstC	1:DN1p_CNMa	0.816271	7.01227	0.0013	5.28646e-16	4.52498e-14	189.826	85.7769	2.21302	HC_cycler	LD
cpx	1:DN1p_CNMa	0.741811	21.1439	0.0044	6.98177e-16	5.85159e-14	35.5886	11.497	3.09546	HC_cycler	LD
Ppcs	1:DN1p_CNMa	0.716047	10.8129	0.0003	8.94047e-16	7.34031e-14	6.73679	0.950198	7.08988	HC_cycler	LD
Mmp2	1:DN1p_CNMa	0.870501	1.68991	0.0004	1.31201e-15	1.05564e-13	18.5555	6.07888	3.05245	HC_cycler	LD
CG13298	1:DN1p_CNMa	0.616305	9.1276	0.0144	1.37796e-15	1.08697e-13	15.2907	1.35422	11.2911	HC_cycler	LD
Ant2	1:DN1p_CNMa	0.66682	22.4804	0.0107	1.47562e-15	1.14162e-13	21.9662	6.18556	3.5512	HC_cycler	LD
jeb	1:DN1p_CNMa	0.71021	22.9413	0.0001	1.62715e-15	1.2351e-13	12.1506	2.52623	4.80977	HC_cycler	LD
CG32052	1:DN1p_CNMa	0.644398	21.4929	0.0042	1.93937e-15	1.44483e-13	6.71771	0.567055	11.8467	HC_cycler	LD
Rgk3	1:DN1p_CNMa	0.575061	21.709	0.0034	2.44874e-15	1.79114e-13	4.39651	0.322925	13.6147	HC_cycler	LD
dpr13	1:DN1p_CNMa	0.660937	9.53314	0.0089	3.11906e-15	2.24071e-13	7.17021	1.27042	5.64396	HC_cycler	LD
CG10947	1:DN1p_CNMa	0.664082	10.436	0.0086	6.28386e-15	4.43508e-13	2.44924	0.160881	15.2239	HC_cycler	LD
CG11030	1:DN1p_CNMa	0.779841	14.739	0.0001	1.34053e-14	9.29818e-13	3.71945	0.573288	6.48793	HC_cycler	LD
nord	1:DN1p_CNMa	0.837032	11.6127	0.0005	1.41832e-14	9.67099e-13	2.72788	0.379981	7.179	HC_cycler	LD
Rab32	1:DN1p_CNMa	0.747182	10.6457	0.0001	1.77626e-14	1.19098e-12	1.27215	0.0404864	31.4216	HC_cycler	LD
Pu	1:DN1p_CNMa	0.681338	11.9942	0.0035	1.89651e-14	1.25076e-12	5.50218	1.01983	5.3952	HC_cycler	LD
Mid1	1:DN1p_CNMa	0.732616	11.398	0.0035	2.14113e-14	1.38932e-12	12.8502	4.43949	2.89453	HC_cycler	LD
Sik3	1:DN1p_CNMa	0.732785	11.9939	0.0058	2.60348e-14	1.63653e-12	2.45495	0.247386	9.92357	HC_cycler	LD
CG5549	1:DN1p_CNMa	0.933686	5.03926	0.0001	5.34786e-14	3.30991e-12	3.68415	0.698835	5.27185	HC_cycler	LD
Ald	1:DN1p_CNMa	0.752018	3.3833	0.0028	8.44045e-14	5.14484e-12	7.6946	2.58452	2.97719	HC_cycler	LD
CG5071	1:DN1p_CNMa	0.675141	6.76903	0.0131	1.02111e-13	6.13123e-12	2.84458	0.287543	9.89271	HC_cycler	LD
bun	1:DN1p_CNMa	0.571788	19.7815	0.0153	1.20154e-13	7.10853e-12	35.2784	13.9808	2.52334	HC_cycler	LD
CG31705	1:DN1p_CNMa	0.803776	5.27764	0.0018	1.42596e-13	8.31397e-12	2.00768	0.0888116	22.606	HC_cycler	LD
Pxn	1:DN1p_CNMa	0.714342	12.6165	0.0008	1.53229e-13	8.80626e-12	2.01972	0.186198	10.8472	HC_cycler	LD
msi	1:DN1p_CNMa	0.862125	3.65246	0.0005	1.93438e-13	1.09606e-11	6.41229	2.01339	3.18483	HC_cycler	LD
CG44422	1:DN1p_CNMa	0.801956	11.7796	0.0019	2.07773e-13	1.16093e-11	9.13411	2.92085	3.12721	HC_cycler	LD
beat-Va	1:DN1p_CNMa	0.959703	9.3365	0.0001	2.37502e-13	1.30886e-11	4.04792	1.07678	3.7593	HC_cycler	LD
kug	1:DN1p_CNMa	0.624904	23.5124	0.009	2.57316e-13	1.3989e-11	5.28435	0.318739	16.5789	HC_cycler	LD
CG9705	1:DN1p_CNMa	0.914434	14.2272	0.0004	2.8626e-13	1.5355e-11	2.31729	0.403594	5.74164	HC_cycler	LD
Spn	1:DN1p_CNMa	0.809594	20.845	0.0008	3.01905e-13	1.59811e-11	8.36291	2.30182	3.63317	HC_cycler	LD
pHCl	1:DN1p_CNMa	0.703326	4.08726	0.0044	3.57169e-13	1.86609e-11	8.34584	2.00359	4.16543	HC_cycler	LD
sgg	1:DN1p_CNMa	0.855908	4.14585	0.0006	4.3363e-13	2.23653e-11	28.6968	15.4305	1.85975	HC_cycler	LD
TrissinR	1:DN1p_CNMa	0.712875	20.0578	0.0017	5.44831e-13	2.7745e-11	1.97555	0.0438847	45.0168	HC_cycler	LD
Dat	1:DN1p_CNMa	0.572991	8.99015	0.015	6.05154e-13	3.04317e-11	1.32163	0.079574	16.6089	HC_cycler	LD
DAT	1:DN1p_CNMa	0.572991	8.99015	0.015	6.05154e-13	3.04317e-11	0.810148	0.124178	6.52411	HC_cycler	LD
CG42750	1:DN1p_CNMa	0.667261	7.4547	0.013	6.7792e-13	3.367e-11	7.36697	2.16611	3.40101	HC_cycler	LD
Tet	1:DN1p_CNMa	0.712425	11.0135	0.0085	7.5918e-13	3.67974e-11	7.8603	2.70819	2.90242	HC_cycler	LD
CG43373	1:DN1p_CNMa	0.856347	14.5455	0.0005	7.72505e-13	3.69975e-11	3.24055	0.603636	5.36838	HC_cycler	LD
CG4577	1:DN1p_CNMa	0.73588	22.8634	0.0073	8.64907e-13	4.09355e-11	11.9465	2.04967	5.82851	HC_cycler	LD
hoe1	1:DN1p_CNMa	0.733667	10.4118	0.0034	1.58183e-12	7.31459e-11	2.19226	0.244551	8.96445	HC_cycler	LD
Appl	1:DN1p_CNMa	0.794167	10.9859	0.0001	2.20703e-12	9.97629e-11	27.7602	13.3403	2.08093	HC_cycler	LD
CG32264	1:DN1p_CNMa	0.675427	11.6913	0.0059	2.57181e-12	1.1496e-10	17.6532	7.26494	2.42992	HC_cycler	LD
CG13868	1:DN1p_CNMa	0.850782	12.3768	0.0009	3.15123e-12	1.39312e-10	3.64805	0.848327	4.30029	HC_cycler	LD
CG44837	1:DN1p_CNMa	0.688098	18.3254	0.0011	4.71873e-12	2.04123e-10	3.86793	0.511844	7.55685	HC_cycler	LD
HmgZ	1:DN1p_CNMa	0.690205	13.9073	0.0084	4.67954e-12	2.04123e-10	7.82832	2.4527	3.19172	HC_cycler	LD
tna	1:DN1p_CNMa	0.664435	23.1009	0.0018	5.43976e-12	2.3281e-10	6.82616	1.5894	4.29481	HC_cycler	LD
CG9850	1:DN1p_CNMa	0.840259	4.39828	0.0016	7.04147e-12	2.98188e-10	1.40017	0.0736556	19.0097	HC_cycler	LD
esn	1:DN1p_CNMa	0.879208	8.43076	0.0003	1.47765e-11	6.12845e-10	2.2633	0.300051	7.54306	HC_cycler	LD
CG18549	1:DN1p_CNMa	0.863964	1.08171	0.0002	1.59034e-11	6.52849e-10	2.01212	0.167361	12.0226	HC_cycler	LD
gogo	1:DN1p_CNMa	0.508169	2.96132	0.0327	1.65644e-11	6.73117e-10	2.71938	0.360293	7.54768	HC_cycler	LD
CG4341	1:DN1p_CNMa	0.601363	10.0548	0.0004	3.13859e-11	1.25015e-09	6.30206	1.19541	5.27189	HC_cycler	LD
Proc	1:DN1p_CNMa	0.738755	6.26954	0.0001	3.59685e-11	1.41864e-09	4.78151	0.0544477	87.8184	HC_cycler	LD
CG5890	1:DN1p_CNMa	0.634065	19.9028	0.0138	5.79962e-11	2.24345e-09	4.75704	0.918888	5.17695	HC_cycler	LD
CG6767	1:DN1p_CNMa	0.795507	7.51257	0.0005	6.90083e-11	2.644e-09	9.8487	3.89668	2.52746	HC_cycler	LD
amon	1:DN1p_CNMa	0.767682	3.34137	0.0007	7.1219e-11	2.70296e-09	5.44995	1.89813	2.87122	HC_cycler	LD
14-3-3epsilon	1:DN1p_CNMa	0.624313	12.1613	0.015	9.44915e-11	3.5527e-09	27.7558	14.5004	1.91414	HC_cycler	LD
CG43066	1:DN1p_CNMa	0.573809	23.3682	0.0263	9.82644e-11	3.66035e-09	6.48787	2.08133	3.11718	HC_cycler	LD
cwo	1:DN1p_CNMa	0.777143	10.734	0.0009	1.01386e-10	3.74197e-09	7.08073	1.53624	4.60913	HC_cycler	LD
cic	1:DN1p_CNMa	0.782898	3.65652	0.0003	1.1221e-10	4.10384e-09	6.24119	1.96655	3.17367	HC_cycler	LD
NK7.1	1:DN1p_CNMa	0.835354	22.9247	0.0012	1.20363e-10	4.36234e-09	1.50281	0.200849	7.48228	HC_cycler	LD
CG31808	1:DN1p_CNMa	0.744119	1.10866	0.0034	1.42792e-10	5.12903e-09	3.91548	1.16932	3.34851	HC_cycler	LD
rdgC	1:DN1p_CNMa	0.947478	6.61615	0.0001	1.69282e-10	6.02674e-09	1.81336	0.234654	7.7278	HC_cycler	LD
CG32082	1:DN1p_CNMa	0.616034	5.65974	0.0235	2.16557e-10	7.64217e-09	1.39972	0.208037	6.72824	HC_cycler	LD
CG15803	1:DN1p_CNMa	0.534561	9.05497	0.0155	2.68311e-10	9.38621e-09	2.21027	0.264501	8.35639	HC_cycler	LD
beat-VI	1:DN1p_CNMa	0.885443	14.8354	0.0007	3.39699e-10	1.17811e-08	4.98992	1.56441	3.18966	HC_cycler	LD
inaC	1:DN1p_CNMa	0.669594	0.60235	0.0073	3.89331e-10	1.3387e-08	1.55994	0.0197107	79.1414	HC_cycler	LD
2mit	1:DN1p_CNMa	0.76497	14.9596	0.0006	4.39333e-10	1.49783e-08	3.50853	1.03915	3.37634	HC_cycler	LD
CG42402	1:DN1p_CNMa	0.650137	15.867	0.0115	4.77299e-10	1.61359e-08	3.51168	0.820888	4.2779	HC_cycler	LD
gol	1:DN1p_CNMa	0.68772	9.15729	0.0039	5.26271e-10	1.76432e-08	1.84619	0.342255	5.39418	HC_cycler	LD
CG31760	1:DN1p_CNMa	0.79747	10.0073	0.0011	5.54659e-10	1.84413e-08	5.67626	2.04797	2.77166	HC_cycler	LD
rad	1:DN1p_CNMa	0.585053	12.8605	0.0134	6.53883e-10	2.1562e-08	15.9368	7.50404	2.12376	HC_cycler	LD
per	1:DN1p_CNMa	0.506338	13.9372	0.0052	7.31222e-10	2.39163e-08	6.57168	0.469831	13.9873	HC_cycler	LD
HDAC4	1:DN1p_CNMa	0.786076	19.5954	0.0015	7.42188e-10	2.40656e-08	4.81642	1.63915	2.93837	HC_cycler	LD
Octbeta1R	1:DN1p_CNMa	0.814044	12.9302	0.0021	7.47751e-10	2.40656e-08	1.27546	0.145108	8.78978	HC_cycler	LD
FASN1	1:DN1p_CNMa	0.542163	9.86016	0.0285	1.23607e-09	3.94661e-08	5.20735	1.17483	4.43241	HC_cycler	LD
Sytbeta	1:DN1p_CNMa	0.695574	5.19827	0.0061	1.33992e-09	4.24449e-08	3.44053	0.629253	5.46764	HC_cycler	LD
chn	1:DN1p_CNMa	0.633812	0.256982	0.004	1.38994e-09	4.3664e-08	6.10343	2.01864	3.02353	HC_cycler	LD
cno	1:DN1p_CNMa	0.747637	9.02622	0.0018	1.40011e-09	4.3664e-08	2.12685	0.387008	5.49563	HC_cycler	LD
nAChRalpha6	1:DN1p_CNMa	0.541178	12.4114	0.036	1.50634e-09	4.66153e-08	10.8695	3.36949	3.22587	HC_cycler	LD
5-HT1A	1:DN1p_CNMa	0.533451	17.1332	0.0087	1.5738e-09	4.83311e-08	3.00471	0.587568	5.11381	HC_cycler	LD
Mnt	1:DN1p_CNMa	0.777852	11.4691	0.0007	1.73025e-09	5.27332e-08	8.14305	3.5752	2.27765	HC_cycler	LD
fax	1:DN1p_CNMa	0.599525	12.1692	0.0187	1.82058e-09	5.50692e-08	23.848	13.7819	1.73039	HC_cycler	LD
nkd	1:DN1p_CNMa	0.716368	7.61983	0.0058	1.87428e-09	5.62703e-08	1.39165	0.194911	7.13993	HC_cycler	LD
Akap200	1:DN1p_CNMa	0.792521	7.59764	0.0016	2.5953e-09	7.67712e-08	2.54708	0.540902	4.70895	HC_cycler	LD
Pdfr	1:DN1p_CNMa	0.57165	18.7309	0.0293	2.63294e-09	7.73161e-08	15.771	4.10425	3.84259	HC_cycler	LD
stai	1:DN1p_CNMa	0.71896	4.35735	0.004	3.01798e-09	8.79807e-08	8.35682	3.77528	2.21356	HC_cycler	LD
CG17777	1:DN1p_CNMa	0.692268	20.3243	0.0076	3.1506e-09	9.11861e-08	2.7591	0.184221	14.9771	HC_cycler	LD
msn	1:DN1p_CNMa	0.627794	19.5156	0.02	3.58338e-09	1.02241e-07	4.63238	1.79339	2.58303	HC_cycler	LD
CG10384	1:DN1p_CNMa	0.722985	11.256	0.0018	3.68714e-09	1.0446e-07	11.8481	2.33453	5.07517	HC_cycler	LD
LpR1	1:DN1p_CNMa	0.795109	12.5004	0.0016	4.10297e-09	1.15428e-07	1.34912	0.362698	3.71968	HC_cycler	LD
CG44838	1:DN1p_CNMa	0.736009	3.35253	0.0028	4.28173e-09	1.19621e-07	2.48296	0.627878	3.95453	HC_cycler	LD
sm	1:DN1p_CNMa	0.570933	1.69402	0.0187	4.37382e-09	1.21351e-07	27.7485	11.4223	2.42933	HC_cycler	LD
VGlut	1:DN1p_CNMa	0.77445	2.9156	0.0028	5.1115e-09	1.40846e-07	38.3354	20.4418	1.87535	HC_cycler	LD
beat-Vb	1:DN1p_CNMa	0.581965	10.239	0.0208	5.84497e-09	1.59961e-07	1.46486	0.18165	8.06416	HC_cycler	LD
wake	1:DN1p_CNMa	0.678554	18.3292	0.0091	7.21561e-09	1.96138e-07	1.23308	0.158833	7.76333	HC_cycler	LD
shep	1:DN1p_CNMa	0.545536	1.41876	0.0055	7.68432e-09	2.07477e-07	29.5621	13.6787	2.16118	HC_cycler	LD
Cad87A	1:DN1p_CNMa	0.653955	1.47144	0.0003	8.65228e-09	2.32054e-07	1.44271	0.154352	9.34687	HC_cycler	LD
CG32683	1:DN1p_CNMa	0.788648	9.88391	0.0004	8.83474e-09	2.35378e-07	3.96273	1.29525	3.05943	HC_cycler	LD
osp	1:DN1p_CNMa	0.640492	21.9201	0.0204	8.95858e-09	2.37108e-07	1.99254	0.382116	5.21449	HC_cycler	LD
dpr8	1:DN1p_CNMa	0.745902	15.7138	0.0008	1.30189e-08	3.37903e-07	6.66076	2.12364	3.13649	HC_cycler	LD
mspo	1:DN1p_CNMa	0.683784	22.0701	0.0029	1.77232e-08	4.57053e-07	1.59589	0.196227	8.13287	HC_cycler	LD
kek2	1:DN1p_CNMa	0.663876	7.9258	0.0093	1.80892e-08	4.63522e-07	2.80872	0.716248	3.92143	HC_cycler	LD
CG32373	1:DN1p_CNMa	0.844155	13.4827	0.0009	2.7537e-08	6.96738e-07	2.23212	0.853611	2.61491	HC_cycler	LD
CG9674	1:DN1p_CNMa	0.733765	2.24885	0.0053	2.79104e-08	7.01771e-07	4.48968	1.60148	2.80345	HC_cycler	LD
Nlg2	1:DN1p_CNMa	0.782041	13.0174	0.0024	3.10796e-08	7.76605e-07	3.38125	1.52312	2.21995	HC_cycler	LD
VepD	1:DN1p_CNMa	0.683277	9.60722	0.006	3.25742e-08	8.08926e-07	2.14514	0.59024	3.63435	HC_cycler	LD
CR45316	1:DN1p_CNMa	0.619766	23.5366	0.0027	3.60128e-08	8.88832e-07	5.74262	0.22054	26.0389	HC_cycler	LD
vvl	1:DN1p_CNMa	0.65114	18.3232	0.0153	4.25431e-08	1.03728e-06	3.02129	0.370882	8.14623	HC_cycler	LD
ITP	1:DN1p_CNMa	0.709738	15.1837	0.0077	4.31124e-08	1.04483e-06	8.53721	2.16209	3.9486	HC_cycler	LD
cv-2	1:DN1p_CNMa	0.564151	2.86152	0.0026	4.39793e-08	1.05945e-06	2.4853	0.0196656	126.378	HC_cycler	LD
Trissin	1:DN1p_CNMa	0.832426	18.1167	0.0001	5.05474e-08	1.20327e-06	2.08048	0.181939	11.435	HC_cycler	LD
CG42540	1:DN1p_CNMa	0.571944	5.87	0.0351	5.36431e-08	1.26945e-06	11.3886	4.74157	2.40186	HC_cycler	LD
CG18812	1:DN1p_CNMa	0.568838	4.01745	0.0179	6.79737e-08	1.59917e-06	3.90338	1.25767	3.10365	HC_cycler	LD
Tob	1:DN1p_CNMa	0.769602	19.2534	0.0035	6.93242e-08	1.62146e-06	8.23457	4.09918	2.00883	HC_cycler	LD
CG17778	1:DN1p_CNMa	0.634323	1.17725	0.0001	7.95197e-08	1.82804e-06	1.79273	0.115766	15.4859	HC_cycler	LD
CG4467	1:DN1p_CNMa	0.654207	16.6855	0.0099	8.37744e-08	1.91491e-06	5.97585	2.20029	2.71594	HC_cycler	LD
CG43689	1:DN1p_CNMa	0.724714	7.08449	0.0102	8.99882e-08	2.04532e-06	9.10698	4.91004	1.85477	HC_cycler	LD
CG1090	1:DN1p_CNMa	0.725092	22.8223	0.0051	1.01127e-07	2.28559e-06	3.68365	0.693278	5.31338	HC_cycler	LD
CG17816	1:DN1p_CNMa	0.779409	3.45661	0.0016	1.09283e-07	2.45612e-06	7.24726	3.23642	2.23929	HC_cycler	LD
FBgn0284408	1:DN1p_CNMa	0.557616	22.6599	0.0021	1.18074e-07	2.5957e-06	22.2805	4.77392	4.66713	HC_cycler	LD
slgA	1:DN1p_CNMa	0.532613	5.37652	0.0379	1.27548e-07	2.77365e-06	6.14516	1.88052	3.26779	HC_cycler	LD
Moe	1:DN1p_CNMa	0.514444	15.6258	0.0138	1.36001e-07	2.92584e-06	7.93985	2.06683	3.84156	HC_cycler	LD
CG43778	1:DN1p_CNMa	0.663767	6.74026	0.0113	1.40426e-07	3.00496e-06	4.51877	0.940573	4.80427	HC_cycler	LD
tinc	1:DN1p_CNMa	0.537226	12.3718	0.0161	1.44068e-07	3.06658e-06	1.34486	0.229099	5.87018	HC_cycler	LD
vib	1:DN1p_CNMa	0.799505	5.80993	0.0022	1.44995e-07	3.07008e-06	5.8568	2.98871	1.95964	HC_cycler	LD
CG13506	1:DN1p_CNMa	0.71765	3.68379	0.0015	1.63692e-07	3.42986e-06	1.77662	0.325065	5.46542	HC_cycler	LD
CG42337	1:DN1p_CNMa	0.678562	11.104	0.0048	1.74451e-07	3.59905e-06	2.74985	0.649972	4.23073	HC_cycler	LD
Sytalpha	1:DN1p_CNMa	0.833528	7.61739	0.0004	1.74451e-07	3.59905e-06	2.72133	0.800045	3.40148	HC_cycler	LD
CG33298	1:DN1p_CNMa	0.533426	10.4732	0.0031	1.80087e-07	3.69638e-06	0.9637	0.152741	6.30939	HC_cycler	LD
CG1688	1:DN1p_CNMa	0.646158	14.6792	0.0119	1.93101e-07	3.94338e-06	1.17237	0.0893214	13.1253	HC_cycler	LD
Syt4	1:DN1p_CNMa	0.587239	8.81697	0.0209	2.2053e-07	4.45826e-06	8.512	3.78819	2.24698	HC_cycler	LD
CG14509	1:DN1p_CNMa	0.720038	8.88666	0.0042	2.30478e-07	4.63606e-06	5.60346	2.6856	2.08648	HC_cycler	LD
CG34113	1:DN1p_CNMa	0.675538	12.0243	0.0072	2.43917e-07	4.85781e-06	1.97193	0.397258	4.96384	HC_cycler	LD
Trpm	1:DN1p_CNMa	0.614218	14.1466	0.0106	2.56492e-07	5.08309e-06	7.21787	2.01706	3.57841	HC_cycler	LD
CG2269	1:DN1p_CNMa	0.806816	8.60856	0.0009	2.64662e-07	5.16862e-06	91.7505	57.0185	1.60914	HC_cycler	LD
ham	1:DN1p_CNMa	0.645174	6.50739	0.0144	2.63012e-07	5.16862e-06	2.32439	0.872846	2.663	HC_cycler	LD
ST6Gal	1:DN1p_CNMa	0.68133	11.9828	0.0021	2.64662e-07	5.16862e-06	1.21875	0.030745	39.6405	HC_cycler	LD
CG15236	1:DN1p_CNMa	0.933844	22.3953	0.0001	2.80022e-07	5.44216e-06	1.72086	0.299723	5.74152	HC_cycler	LD
Pka-R2	1:DN1p_CNMa	0.573096	5.07747	0.0234	2.9255e-07	5.65832e-06	9.91588	3.78034	2.62301	HC_cycler	LD
klar	1:DN1p_CNMa	0.660697	7.64489	0.008	3.0947e-07	5.95693e-06	2.30056	0.561415	4.09779	HC_cycler	LD
Xrp1	1:DN1p_CNMa	0.732656	7.75112	0.0071	3.29371e-07	6.27991e-06	5.26563	1.97365	2.66796	HC_cycler	LD
fru	1:DN1p_CNMa	0.627598	17.5717	0.0194	3.59323e-07	6.81866e-06	6.73574	2.79334	2.41136	HC_cycler	LD
ctrip	1:DN1p_CNMa	0.564931	12.7537	0.0193	3.68353e-07	6.9572e-06	3.06325	1.3023	2.35219	HC_cycler	LD
Eip75B	1:DN1p_CNMa	0.710937	9.34157	0.0023	3.87075e-07	7.27666e-06	12.0697	4.73626	2.54836	HC_cycler	LD
Tbh	1:DN1p_CNMa	0.548662	19.1801	0.0201	3.91898e-07	7.33305e-06	9.63928	3.02258	3.18909	HC_cycler	LD
14-3-3zeta	1:DN1p_CNMa	0.524115	11.6764	0.0363	3.99233e-07	7.40144e-06	41.282	24.2803	1.70023	HC_cycler	LD
COX6B	1:DN1p_CNMa	0.840308	21.1183	0.0001	3.99233e-07	7.40144e-06	4.18412	1.88065	2.22482	HC_cycler	LD
Dmtn	1:DN1p_CNMa	0.665636	2.84708	0.0034	4.06715e-07	7.50558e-06	1.92794	0.325832	5.91697	HC_cycler	LD
Frq2	1:DN1p_CNMa	0.822732	3.96332	0.0013	4.11774e-07	7.56423e-06	3.52386	0.960753	3.66781	HC_cycler	LD
CG45057	1:DN1p_CNMa	0.73224	4.79591	0.0058	4.24679e-07	7.76584e-06	1.12458	0.151803	7.40813	HC_cycler	LD
CG8958	1:DN1p_CNMa	0.694202	17.9388	0.0011	4.48923e-07	8.13521e-06	1.93643	0.0602211	32.1553	HC_cycler	LD
CR45102	1:DN1p_CNMa	0.594433	11.6834	0.0155	4.48923e-07	8.13521e-06	3.01106	0.746059	4.03595	HC_cycler	LD
CG6024	1:DN1p_CNMa	0.520164	11.5439	0.032	4.71583e-07	8.46954e-06	5.92678	2.4575	2.41171	HC_cycler	LD
tkv	1:DN1p_CNMa	0.522369	9.50078	0.0432	4.98386e-07	8.91114e-06	1.03615	0.0713594	14.5202	HC_cycler	LD
Lasp	1:DN1p_CNMa	0.728935	6.55643	0.0017	5.17072e-07	9.20434e-06	1.17169	0.140915	8.31489	HC_cycler	LD
Irk1	1:DN1p_CNMa	0.733339	7.74905	0.007	5.87959e-07	1.04201e-05	1.29429	0.222491	5.81727	HC_cycler	LD
porin	1:DN1p_CNMa	0.556761	3.72549	0.019	6.02484e-07	1.05842e-05	8.06008	3.52265	2.28807	HC_cycler	LD
Ten-a	1:DN1p_CNMa	0.667327	9.10541	0.0018	6.52107e-07	1.14062e-05	13.6752	6.82625	2.00332	HC_cycler	LD
app	1:DN1p_CNMa	0.505983	9.88196	0.0371	6.60085e-07	1.14958e-05	1.72551	0.286825	6.01591	HC_cycler	LD
CG14431	1:DN1p_CNMa	0.524376	13.9835	0.009	7.05688e-07	1.2237e-05	2.46378	0.499674	4.93078	HC_cycler	LD
Mef2	1:DN1p_CNMa	0.803568	9.52111	0.0004	7.23008e-07	1.24835e-05	4.81961	1.65557	2.91114	HC_cycler	LD
pog	1:DN1p_CNMa	0.74321	2.68795	0.0008	8.25847e-07	1.41982e-05	3.65529	1.2887	2.83641	HC_cycler	LD
MYPT-75D	1:DN1p_CNMa	0.770937	18.1153	0.003	8.51099e-07	1.45084e-05	0.872184	0.135549	6.43445	HC_cycler	LD
CG9328	1:DN1p_CNMa	0.548817	22.1273	0.0306	8.56257e-07	1.45347e-05	2.72293	0.659955	4.12593	HC_cycler	LD
CG18265	1:DN1p_CNMa	0.893066	7.556	0.0003	9.20348e-07	1.5557e-05	2.60037	0.79851	3.25652	HC_cycler	LD
InR	1:DN1p_CNMa	0.762167	15.3637	0.0035	9.89053e-07	1.6579e-05	1.67366	0.598263	2.79753	HC_cycler	LD
HmgD	1:DN1p_CNMa	0.519139	14.1044	0.0392	1.13479e-06	1.88647e-05	1.34244	0.449498	2.98653	HC_cycler	LD
CG8026	1:DN1p_CNMa	0.698572	8.91535	0.0059	1.20443e-06	1.98583e-05	2.26126	0.746407	3.02952	HC_cycler	LD
Msp300	1:DN1p_CNMa	0.657445	3.5355	0.0168	1.20443e-06	1.98583e-05	33.0149	20.1732	1.63657	HC_cycler	LD
stan	1:DN1p_CNMa	0.674503	7.98349	0.0065	1.30888e-06	2.14924e-05	0.831671	0.0594306	13.994	HC_cycler	LD
CG7702	1:DN1p_CNMa	0.750732	22.8781	0.0029	1.60962e-06	2.63232e-05	1.95139	0.264608	7.37465	HC_cycler	LD
Srpk79D	1:DN1p_CNMa	0.932178	13.7552	0.0001	1.64796e-06	2.6841e-05	1.45174	0.453199	3.20331	HC_cycler	LD
Hsp83	1:DN1p_CNMa	0.70462	10.8763	0.0001	1.66745e-06	2.7049e-05	7.30713	2.86001	2.55493	HC_cycler	LD
FBgn0285944	1:DN1p_CNMa	0.760776	0.915428	0.002	1.67725e-06	2.70987e-05	22.6511	12.7101	1.78213	HC_cycler	LD
Rph	1:DN1p_CNMa	0.655974	7.74323	0.0086	1.68717e-06	2.71499e-05	1.1418	0.163671	6.97616	HC_cycler	LD
pyd	1:DN1p_CNMa	0.597598	13.7066	0.0214	2.13202e-06	3.41718e-05	1.3803	0.14447	9.55423	HC_cycler	LD
Glut4EF	1:DN1p_CNMa	0.598885	22.6695	0.0203	2.53767e-06	4.00354e-05	9.39126	4.67588	2.00845	HC_cycler	LD
CG1943	1:DN1p_CNMa	0.693712	7.6986	0.0093	2.55235e-06	4.01098e-05	2.62188	0.757172	3.46273	HC_cycler	LD
CCHa1	1:DN1p_CNMa	0.61685	17.16	0.0156	2.78339e-06	4.35703e-05	0.933452	0.0119737	77.9585	HC_cycler	LD
Scsalpha	1:DN1p_CNMa	0.562934	16.3939	0.0249	3.23219e-06	5.02051e-05	1.91054	0.468159	4.08096	HC_cycler	LD
CG12484	1:DN1p_CNMa	0.518251	3.50028	0.0388	4.1545e-06	6.40366e-05	3.10537	1.21226	2.56164	HC_cycler	LD
Act5C	1:DN1p_CNMa	0.523464	22.8427	0.0383	4.39691e-06	6.75144e-05	16.5673	5.81588	2.84863	HC_cycler	LD
pod1	1:DN1p_CNMa	0.596877	13.2197	0.0023	5.76238e-06	8.61787e-05	3.85862	1.01165	3.8142	HC_cycler	LD
CG6044	1:DN1p_CNMa	0.693267	8.213	0.0102	5.99265e-06	8.92905e-05	1.4271	0.495063	2.88267	HC_cycler	LD
Ppa	1:DN1p_CNMa	0.54329	3.08428	0.0067	6.09415e-06	9.04677e-05	1.79789	0.116109	15.4846	HC_cycler	LD
CG34353	1:DN1p_CNMa	0.622646	16.0948	0.0087	6.19711e-06	9.16579e-05	3.9762	1.5388	2.58397	HC_cycler	LD
Thor	1:DN1p_CNMa	0.674715	8.6064	0.0007	7.0839e-06	0.000104009	2.56731	0.367472	6.98643	HC_cycler	LD
sick	1:DN1p_CNMa	0.628682	14.9135	0.0115	7.40565e-06	0.000108338	5.45935	1.8124	3.01222	HC_cycler	LD
Hsc70-4	1:DN1p_CNMa	0.534933	7.3896	0.0194	7.44695e-06	0.000108547	10.4314	5.19653	2.00738	HC_cycler	LD
Gpdh	1:DN1p_CNMa	0.597731	22.049	0.0056	8.22709e-06	0.000119486	1.38407	0.148765	9.30377	HC_cycler	LD
Ac78C	1:DN1p_CNMa	0.823412	22.4843	0.0003	8.93637e-06	0.000128397	0.805966	0.0540764	14.9042	HC_cycler	LD
Dscam3	1:DN1p_CNMa	0.646193	18.8222	0.0008	1.03071e-05	0.000146521	0.811256	0.0781923	10.3751	HC_cycler	LD
CG8216	1:DN1p_CNMa	0.683173	12.5991	0.0095	1.03638e-05	0.000146808	0.82529	0.152257	5.42037	HC_cycler	LD
sea	1:DN1p_CNMa	0.710098	16.2399	0.007	1.06509e-05	0.000150345	1.91949	0.73359	2.61657	HC_cycler	LD
S6KL	1:DN1p_CNMa	0.730445	15.5058	0.0035	1.1434e-05	0.000160835	1.18096	0.460711	2.56333	HC_cycler	LD
Df31	1:DN1p_CNMa	0.618141	12.157	0.0123	1.17494e-05	0.000164451	9.19604	5.03449	1.82661	HC_cycler	LD
Dif	1:DN1p_CNMa	0.557933	6.48086	0.0356	1.18137e-05	0.000164451	1.74478	0.24762	7.0462	HC_cycler	LD
Npc2b	1:DN1p_CNMa	0.529975	17.8393	0.0059	1.18137e-05	0.000164451	2.36708	0.0431609	54.8433	HC_cycler	LD
gl	1:DN1p_CNMa	0.611414	7.0109	0.0254	1.2956e-05	0.000177891	3.541	1.23428	2.86888	HC_cycler	LD
CG43737	1:DN1p_CNMa	0.685415	18.5615	0.0011	1.34567e-05	0.000184138	5.58566	2.43799	2.29109	HC_cycler	LD
ND-MLRQ	1:DN1p_CNMa	0.701384	18.3684	0.0043	1.56505e-05	0.000210574	2.24877	0.792686	2.8369	HC_cycler	LD
cry	1:DN1p_CNMa	0.553457	4.28765	0.0325	1.63376e-05	0.000218359	3.52145	1.20654	2.91864	HC_cycler	LD
plx	1:DN1p_CNMa	0.733256	5.70257	0.0055	1.63376e-05	0.000218359	2.64544	1.36647	1.93597	HC_cycler	LD
CG5334	1:DN1p_CNMa	0.522499	22.307	0.0338	1.70536e-05	0.000226424	3.85945	0.4147	9.30661	HC_cycler	LD
CG9426	1:DN1p_CNMa	0.579422	15.3282	0.0144	1.70536e-05	0.000226424	1.04769	0.151711	6.90583	HC_cycler	LD
sty	1:DN1p_CNMa	0.725019	19.3308	0.0016	1.73295e-05	0.000228578	1.06296	0.250737	4.23933	HC_cycler	LD
CG13995	1:DN1p_CNMa	0.642683	2.05615	0.0048	1.74227e-05	0.000229057	1.54982	0.416574	3.72039	HC_cycler	LD
CG42784	1:DN1p_CNMa	0.603435	7.55608	0.0188	1.78946e-05	0.000234229	10.3485	5.13329	2.01596	HC_cycler	LD
cype	1:DN1p_CNMa	0.613418	20.2054	0.0082	1.79908e-05	0.000234229	2.77256	1.1498	2.41133	HC_cycler	LD
Fife	1:DN1p_CNMa	0.600142	3.43402	0.0131	2.09952e-05	0.000271588	5.64743	2.58004	2.18889	HC_cycler	LD
CG7708	1:DN1p_CNMa	0.700706	18.6024	0.0068	2.52626e-05	0.000322639	5.39104	0.783804	6.87804	HC_cycler	LD
spen	1:DN1p_CNMa	0.567382	19.5309	0.0198	2.79136e-05	0.000353134	16.2706	9.19968	1.76861	HC_cycler	LD
fne	1:DN1p_CNMa	0.647913	3.70502	0.0087	2.85047e-05	0.000359481	29.9041	17.3911	1.7195	HC_cycler	LD
CG9813	1:DN1p_CNMa	0.707447	20.7943	0.0032	3.09908e-05	0.000387192	1.63469	0.428928	3.81111	HC_cycler	LD
Vap-33A	1:DN1p_CNMa	0.549598	13.6944	0.028	3.29898e-05	0.000410891	12.0771	5.24527	2.30248	HC_cycler	LD
bol	1:DN1p_CNMa	0.515675	19.9356	0.0411	3.3859e-05	0.000419122	11.9753	2.97421	4.02637	HC_cycler	LD
CG43921	1:DN1p_CNMa	0.65879	14.0147	0.0016	3.40349e-05	0.000420007	4.44337	2.23509	1.98801	HC_cycler	LD
mAChR-B	1:DN1p_CNMa	0.683196	22.535	0.0038	3.45696e-05	0.000424005	2.08276	0.619919	3.35974	HC_cycler	LD
twit	1:DN1p_CNMa	0.710806	5.67698	0.006	3.73631e-05	0.000454114	0.867757	0.179735	4.82797	HC_cycler	LD
CG8818	1:DN1p_CNMa	0.765416	18.9213	0.0009	3.75573e-05	0.000455099	1.55543	0.145754	10.6716	HC_cycler	LD
RYa-R	1:DN1p_CNMa	0.517785	20.8944	0.0102	4.01641e-05	0.000485225	0.91624	0.0616348	14.8656	HC_cycler	LD
ArfGAP1	1:DN1p_CNMa	0.740007	15.8085	0.004	4.03721e-05	0.000486279	1.11287	0.271093	4.10513	HC_cycler	LD
ND-B17.2	1:DN1p_CNMa	0.761552	21.0178	0.0023	4.52058e-05	0.000541258	0.922736	0.232736	3.96473	HC_cycler	LD
mub	1:DN1p_CNMa	0.591911	19.2665	0.0167	5.03301e-05	0.000600825	6.36612	2.558	2.48871	HC_cycler	LD
nAChRalpha1	1:DN1p_CNMa	0.561391	22.3081	0.03	5.05881e-05	0.000602118	2.67941	0.953238	2.81086	HC_cycler	LD
eIF5	1:DN1p_CNMa	0.570383	12.9337	0.0252	5.24244e-05	0.000620304	6.28301	2.99495	2.09786	HC_cycler	LD
sn	1:DN1p_CNMa	0.687225	10.6347	0.0036	5.92171e-05	0.000694549	1.37849	0.459544	2.99969	HC_cycler	LD
scrt	1:DN1p_CNMa	0.681042	22.9671	0.0022	5.95183e-05	0.000696052	5.37079	2.92649	1.83523	HC_cycler	LD
Sln	1:DN1p_CNMa	0.816452	2.66907	0.0015	6.10418e-05	0.000707698	3.15264	1.12117	2.81192	HC_cycler	LD
Rab5	1:DN1p_CNMa	0.579723	13.6851	0.0191	6.42026e-05	0.000742204	6.5006	2.7571	2.35777	HC_cycler	LD
CG6330	1:DN1p_CNMa	0.602244	21.0222	0.0131	6.55101e-05	0.000755149	1.25002	0.0831396	15.0351	HC_cycler	LD
CG33144	1:DN1p_CNMa	0.532825	1.90132	0.0004	6.61732e-05	0.000758447	1.69364	0.278172	6.08846	HC_cycler	LD
DIP-beta	1:DN1p_CNMa	0.60181	15.7929	0.0156	6.61732e-05	0.000758447	0.866614	0.131998	6.56536	HC_cycler	LD
ND-23	1:DN1p_CNMa	0.667727	18.8243	0.0088	6.85459e-05	0.00078341	4.36383	1.5042	2.90109	HC_cycler	LD
Abl	1:DN1p_CNMa	0.607986	0.517943	0.0218	7.06432e-05	0.000805092	3.21092	1.57834	2.03437	HC_cycler	LD
Rac1	1:DN1p_CNMa	0.656647	13.2854	0.0048	7.09977e-05	0.000806847	1.79105	0.803552	2.22891	HC_cycler	LD
nSyb	1:DN1p_CNMa	0.593732	21.8072	0.017	7.46468e-05	0.000841187	19.2288	12.6964	1.51451	HC_cycler	LD
kdn	1:DN1p_CNMa	0.838227	3.61465	0.0004	7.57767e-05	0.000851536	2.19099	0.710561	3.08346	HC_cycler	LD
Ank2	1:DN1p_CNMa	0.649398	10.5742	0.0092	7.84738e-05	0.000879387	40.4444	24.8815	1.62548	HC_cycler	LD
CG2082	1:DN1p_CNMa	0.650129	20.3534	0.0054	8.16691e-05	0.000912652	1.73878	0.353005	4.92567	HC_cycler	LD
CG8036	1:DN1p_CNMa	0.959804	13.8005	0.0001	8.49878e-05	0.00094189	1.90386	0.79439	2.39664	HC_cycler	LD
Cyp1	1:DN1p_CNMa	0.694193	9.79831	0.0014	8.49878e-05	0.00094189	6.34531	3.11693	2.03576	HC_cycler	LD
CG13203	1:DN1p_CNMa	0.526633	19.7508	0.0392	8.93168e-05	0.000979078	2.86159	0.40352	7.09156	HC_cycler	LD
bin3	1:DN1p_CNMa	0.579801	12.3756	0.0099	9.06569e-05	0.000988382	1.68766	0.408236	4.13402	HC_cycler	LD
LRP1	1:DN1p_CNMa	0.792676	23.8752	0.0004	9.06569e-05	0.000988382	0.925521	0.0318633	29.0466	HC_cycler	LD
Cow	1:DN1p_CNMa	0.668882	1.84052	0.0071	9.38549e-05	0.00102048	4.12982	2.00514	2.05962	HC_cycler	LD
CG12054	1:DN1p_CNMa	0.592629	22.7183	0.0096	0.000100578	0.0010877	4.64513	2.08843	2.22422	HC_cycler	LD
kek1	1:DN1p_CNMa	0.72472	18.4046	0.0088	0.000102078	0.00110096	1.34985	0.443092	3.04642	HC_cycler	LD
CG34247	1:DN1p_CNMa	0.524724	15.8467	0.0199	0.000104622	0.00112539	1.07741	0.0560712	19.215	HC_cycler	LD
EndoA	1:DN1p_CNMa	0.666674	12.1827	0.0106	0.00011542	0.0012284	4.06825	2.36146	1.72277	HC_cycler	LD
hook	1:DN1p_CNMa	0.813434	11.5047	0.0003	0.000122399	0.00129241	0.95918	0.213794	4.48648	HC_cycler	LD
mam	1:DN1p_CNMa	0.520052	3.86166	0.0425	0.000126654	0.00133384	2.21219	0.665605	3.32358	HC_cycler	LD
lost	1:DN1p_CNMa	0.792408	7.62092	0.0016	0.000129147	0.00135302	1.617	0.76681	2.10874	HC_cycler	LD
phol	1:DN1p_CNMa	0.854957	19.5868	0.0005	0.000129776	0.00135608	1.35945	0.241838	5.62133	HC_cycler	LD
nrm	1:DN1p_CNMa	0.794071	16.3228	0.001	0.000139594	0.00144739	2.58317	1.16128	2.22442	HC_cycler	LD
dpr1	1:DN1p_CNMa	0.609189	18.6009	0.0226	0.000140271	0.00145028	1.11287	0.087853	12.6674	HC_cycler	LD
SC35	1:DN1p_CNMa	0.659743	18.5071	0.0093	0.000140955	0.00145028	2.86638	0.218735	13.1043	HC_cycler	LD
vig	1:DN1p_CNMa	0.866082	9.39495	0.0005	0.000140955	0.00145028	4.16466	2.43187	1.71254	HC_cycler	LD
ovo	1:DN1p_CNMa	0.739497	17.1979	0.0003	0.000145113	0.00148926	1.36864	0.128372	10.6615	HC_cycler	LD
toy	1:DN1p_CNMa	0.750008	18.8176	0.0049	0.000145816	0.00149267	1.01977	0.166359	6.12996	HC_cycler	LD
CG6685	1:DN1p_CNMa	0.536878	1.19036	0.0315	0.000149388	0.00152535	0.951187	0.170507	5.57858	HC_cycler	LD
ATPsynCF6	1:DN1p_CNMa	0.610252	20.0219	0.0027	0.000151568	0.0015437	6.32454	2.76374	2.2884	HC_cycler	LD
CG5174	1:DN1p_CNMa	0.60638	8.72668	0.0099	0.000153782	0.00156229	2.12087	0.665481	3.18697	HC_cycler	LD
CG3638	1:DN1p_CNMa	0.636707	9.7855	0.0167	0.000160602	0.0016193	2.46071	0.747349	3.29259	HC_cycler	LD
ATPsynD	1:DN1p_CNMa	0.505108	20.343	0.0438	0.000164516	0.00164639	2.12041	0.580121	3.65511	HC_cycler	LD
CG4612	1:DN1p_CNMa	0.625181	10.2345	0.0144	0.000164516	0.00164639	4.42545	2.2632	1.9554	HC_cycler	LD
dia	1:DN1p_CNMa	0.614519	19.618	0.0058	0.000177653	0.00175171	1.13471	0.0138579	81.8816	HC_cycler	LD
ND-B18	1:DN1p_CNMa	0.847967	18.903	0.0001	0.000177653	0.00175171	1.00116	0.319559	3.13294	HC_cycler	LD
be	1:DN1p_CNMa	0.579422	22.5724	0.0156	0.000182831	0.00179836	1.59575	0.121725	13.1094	HC_cycler	LD
Csk	1:DN1p_CNMa	0.556917	21.7388	0.0278	0.000197347	0.00192701	2.74171	0.522444	5.24785	HC_cycler	LD
rgn	1:DN1p_CNMa	0.618975	12.2786	0.0201	0.000205008	0.00199697	2.44831	0.776176	3.15433	HC_cycler	LD
CG42637	1:DN1p_CNMa	0.507522	0.272433	0.0464	0.000220135	0.00213399	1.13923	0.29112	3.91326	HC_cycler	LD
dpr11	1:DN1p_CNMa	0.655249	2.7969	0.0014	0.000227554	0.00219533	2.21488	0.745817	2.96974	HC_cycler	LD
Mpcp	1:DN1p_CNMa	0.769922	20.0035	0.0018	0.000231898	0.00223188	11.3657	6.12802	1.85471	HC_cycler	LD
Rfx	1:DN1p_CNMa	0.699802	7.80884	0.0083	0.00023632	0.00226361	3.5174	1.65564	2.1245	HC_cycler	LD
CG6983	1:DN1p_CNMa	0.63213	20.2156	0.0099	0.000259653	0.00246364	1.32842	0.102484	12.9622	HC_cycler	LD
NAT1	1:DN1p_CNMa	0.723963	8.36666	0.0038	0.000264574	0.00249269	3.5665	1.84381	1.93431	HC_cycler	LD
CG14215	1:DN1p_CNMa	0.56571	20.5221	0.0281	0.000270846	0.00254583	1.47207	0.201676	7.29919	HC_cycler	LD
CaMKII	1:DN1p_CNMa	0.522876	7.98697	0.0311	0.000279871	0.00262452	9.04252	4.70756	1.92085	HC_cycler	LD
UbcE2H	1:DN1p_CNMa	0.71885	7.59049	0.0026	0.000296002	0.00276291	1.95848	0.864642	2.26508	HC_cycler	LD
CG13375	1:DN1p_CNMa	0.526925	0.461177	0.0426	0.000297382	0.00276937	2.16791	0.413622	5.24129	HC_cycler	LD
CG31637	1:DN1p_CNMa	0.682462	20.355	0.0074	0.000354707	0.00325796	2.16876	0.615958	3.52095	HC_cycler	LD
tsr	1:DN1p_CNMa	0.619866	12.5043	0.0162	0.000356352	0.00326561	1.36434	0.400486	3.4067	HC_cycler	LD
CG1607	1:DN1p_CNMa	0.598967	5.05112	0.0177	0.000368037	0.00336503	1.27052	0.333929	3.80475	HC_cycler	LD
CR44357	1:DN1p_CNMa	0.599726	17.5833	0.0126	0.000371443	0.00338847	5.20812	2.64185	1.97139	HC_cycler	LD
CG5946	1:DN1p_CNMa	0.740417	18.7691	0.0016	0.000380091	0.00345171	1.23309	0.428494	2.87773	HC_cycler	LD
CG4502	1:DN1p_CNMa	0.679921	20.1485	0.0099	0.00040162	0.00362268	4.62245	2.52217	1.83272	HC_cycler	LD
eIF2B-beta	1:DN1p_CNMa	0.719033	16.4192	0.0046	0.000409048	0.00367322	0.833832	0.134068	6.21945	HC_cycler	LD
Tomosyn	1:DN1p_CNMa	0.649883	13.9214	0.0098	0.000420434	0.00375868	4.85432	2.62512	1.84918	HC_cycler	LD
Pif1B	1:DN1p_CNMa	0.518203	2.46688	0.0285	0.000464793	0.00410057	1.66289	0.267703	6.2117	HC_cycler	LD
numb	1:DN1p_CNMa	0.565174	10.0044	0.0242	0.000490812	0.00430182	0.806097	0.256991	3.13668	HC_cycler	LD
Sox21b	1:DN1p_CNMa	0.5742	4.21862	0.0263	0.000515858	0.00450173	2.85551	1.35573	2.10626	HC_cycler	LD
MEP-1	1:DN1p_CNMa	0.766023	13.9794	0.0017	0.00052054	0.00453275	2.3753	1.08002	2.19931	HC_cycler	LD
alpha-Man-IIb	1:DN1p_CNMa	0.64476	3.47196	0.0063	0.000574757	0.00495128	1.30067	0.152293	8.54057	HC_cycler	LD
Plc21C	1:DN1p_CNMa	0.55706	17.0996	0.0334	0.000577349	0.00496298	3.34808	1.42466	2.35009	HC_cycler	LD
lola	1:DN1p_CNMa	0.512048	3.13969	0.0326	0.000595758	0.00508861	10.0698	5.26613	1.91218	HC_cycler	LD
ND-20	1:DN1p_CNMa	0.723448	17.5233	0.0042	0.00061198	0.00520507	1.13033	0.325196	3.47583	HC_cycler	LD
Rim	1:DN1p_CNMa	0.586801	4.68741	0.0204	0.000651465	0.0055292	9.26763	5.47484	1.69277	HC_cycler	LD
CG44153	1:DN1p_CNMa	0.740949	20.0879	0.0015	0.000654381	0.00554226	2.76532	1.13644	2.43332	HC_cycler	LD
step	1:DN1p_CNMa	0.77049	7.95956	0.0012	0.00067509	0.00570565	0.973037	0.218761	4.44794	HC_cycler	LD
Gfrl	1:DN1p_CNMa	0.549662	4.29195	0.0201	0.000684162	0.00573572	11.3649	6.0272	1.8856	HC_cycler	LD
plum	1:DN1p_CNMa	0.589513	2.53984	0.0223	0.000687203	0.00573572	3.14064	1.6452	1.90897	HC_cycler	LD
Cals	1:DN1p_CNMa	0.514163	9.22556	0.0053	0.000696428	0.00580068	6.83246	3.51747	1.94244	HC_cycler	LD
CG34354	1:DN1p_CNMa	0.556856	23.1758	0.0196	0.000728003	0.00601388	0.954917	0.172188	5.54578	HC_cycler	LD
dally	1:DN1p_CNMa	0.5217	15.6742	0.0404	0.000731227	0.00602813	0.969544	0.260815	3.71736	HC_cycler	LD
5-HT2B	1:DN1p_CNMa	0.566303	19.5132	0.0161	0.000734478	0.00603021	0.854361	0.0257709	33.1522	HC_cycler	LD
Karybeta3	1:DN1p_CNMa	0.542311	12.5608	0.0401	0.000747589	0.00610051	1.18051	0.329784	3.57966	HC_cycler	LD
Atf3	1:DN1p_CNMa	0.625464	9.04341	0.0163	0.000760921	0.00619673	3.68638	1.44211	2.55623	HC_cycler	LD
Rab3-GEF	1:DN1p_CNMa	0.719775	9.19593	0.0002	0.00076767	0.00623906	2.90377	1.29096	2.24932	HC_cycler	LD
Vha16-1	1:DN1p_CNMa	0.510143	6.66712	0.0358	0.000774475	0.00626904	17.2514	10.7363	1.60682	HC_cycler	LD
GC	1:DN1p_CNMa	0.582275	9.04558	0.014	0.00084943	0.00684821	4.74274	2.5281	1.87601	HC_cycler	LD
Syngr	1:DN1p_CNMa	0.680115	6.27454	0.0057	0.000868264	0.00694438	2.69024	1.55207	1.73332	HC_cycler	LD
CR44779	1:DN1p_CNMa	0.536127	0.234533	0.0366	0.000887473	0.00706991	1.04382	0.157426	6.63056	HC_cycler	LD
Sdc	1:DN1p_CNMa	0.549941	18.6563	0.0308	0.000907097	0.00718357	11.0526	6.93251	1.59431	HC_cycler	LD
mtt	1:DN1p_CNMa	0.767098	18.4808	0.0009	0.000947557	0.00748924	1.00338	0.411833	2.43636	HC_cycler	LD
AstA-R1	1:DN1p_CNMa	0.748872	21.165	0.001	0.000960013	0.00755798	0.911221	0.202645	4.49664	HC_cycler	LD
Btk29A	1:DN1p_CNMa	0.798286	13.7699	0.0007	0.00101583	0.00788936	3.43449	1.55495	2.20874	HC_cycler	LD
CG7630	1:DN1p_CNMa	0.631664	21.1188	0.0057	0.00101583	0.00788936	1.3675	0.46466	2.94301	HC_cycler	LD
gukh	1:DN1p_CNMa	0.917994	7.09861	0.0001	0.00106541	0.00824258	0.894363	0.19153	4.66956	HC_cycler	LD
CG5028	1:DN1p_CNMa	0.677571	18.3372	0.0099	0.00128735	0.00971672	0.933138	0.392573	2.37698	HC_cycler	LD
Rsf1	1:DN1p_CNMa	0.860583	9.61888	0.0006	0.00134925	0.0101459	1.7807	0.99291	1.79341	HC_cycler	LD
CG34355	1:DN1p_CNMa	0.621848	10.3814	0.0106	0.00136659	0.010238	4.49003	2.13221	2.10581	HC_cycler	LD
tral	1:DN1p_CNMa	0.688507	6.98873	0.0054	0.00137828	0.0103064	3.80949	1.81715	2.09641	HC_cycler	LD
Thd1	1:DN1p_CNMa	0.508121	14.6113	0.0336	0.00138417	0.0103312	5.91307	3.01486	1.96131	HC_cycler	LD
ndl	1:DN1p_CNMa	0.650836	18.802	0.0094	0.0014139	0.0104947	1.38782	0.248408	5.58687	HC_cycler	LD
CG4829	1:DN1p_CNMa	0.570636	7.27102	0.0076	0.00143205	0.0106098	0.87911	0.0783645	11.2182	HC_cycler	LD
CycG	1:DN1p_CNMa	0.601629	23.0763	0.0154	0.00145656	0.0107321	6.76667	4.37363	1.54715	HC_cycler	LD
CG32506	1:DN1p_CNMa	0.556447	9.59646	0.0264	0.00159856	0.0116083	1.58805	0.590556	2.68908	HC_cycler	LD
Rcd-1	1:DN1p_CNMa	0.671042	14.1253	0.0068	0.00159856	0.0116083	1.79952	0.598338	3.00753	HC_cycler	LD
ATP8B	1:DN1p_CNMa	0.579206	3.40703	0.0098	0.00181313	0.0129101	1.25981	0.259087	4.86249	HC_cycler	LD
CG3822	1:DN1p_CNMa	0.536959	9.83905	0.0161	0.00198725	0.0140013	1.2054	0.376509	3.20153	HC_cycler	LD
Pect	1:DN1p_CNMa	0.626605	11.0972	0.0216	0.00202054	0.0141861	1.01032	0.402737	2.50864	HC_cycler	LD
CD98hc	1:DN1p_CNMa	0.534631	4.42986	0.0443	0.00204583	0.0143137	1.43246	0.712935	2.00925	HC_cycler	LD
Gyc88E	1:DN1p_CNMa	0.574584	9.42968	0.0275	0.00205435	0.0143484	0.925562	0.137563	6.72829	HC_cycler	LD
pk	1:DN1p_CNMa	0.542093	18.4472	0.0327	0.00208869	0.0145629	0.993616	0.0130622	76.0681	HC_cycler	LD
Synj	1:DN1p_CNMa	0.627446	11.1604	0.0149	0.00211477	0.0147192	1.08289	0.228354	4.74217	HC_cycler	LD
CG42817	1:DN1p_CNMa	0.528859	7.8773	0.0244	0.00215005	0.0149389	0.939572	0.263281	3.56871	HC_cycler	LD
CG3800	1:DN1p_CNMa	0.512491	10.1021	0.0253	0.00215897	0.0149493	5.33071	3.27343	1.62848	HC_cycler	LD
Tektin-C	1:DN1p_CNMa	0.706852	19.2776	0.005	0.00216789	0.0149853	0.854143	0.282589	3.02256	HC_cycler	LD
Rm62	1:DN1p_CNMa	0.507384	5.73112	0.0435	0.00231569	0.0158166	3.61004	1.65973	2.17507	HC_cycler	LD
CG12071	1:DN1p_CNMa	0.537328	14.4621	0.0371	0.0024227	0.0163532	2.72097	1.61961	1.68002	HC_cycler	LD
Gclc	1:DN1p_CNMa	0.569567	17.4887	0.0328	0.0024227	0.0163532	0.979623	0.366426	2.67346	HC_cycler	LD
ND-13A	1:DN1p_CNMa	0.520865	19.8692	0.0046	0.00246274	0.0165679	2.25718	0.720069	3.13467	HC_cycler	LD
CG34383	1:DN1p_CNMa	0.544973	19.7969	0.032	0.00252396	0.0168669	2.27456	0.87258	2.6067	HC_cycler	LD
Pde1c	1:DN1p_CNMa	0.703742	20.818	0.0074	0.00260778	0.0172551	2.14448	1.1585	1.85108	HC_cycler	LD
Su(var)205	1:DN1p_CNMa	0.553819	11.8608	0.0305	0.00268322	0.0176671	1.14541	0.409595	2.79644	HC_cycler	LD
CG14186	1:DN1p_CNMa	0.55297	1.92182	0.0331	0.0028634	0.0186701	1.23646	0.194326	6.36285	HC_cycler	LD
Fer1HCH	1:DN1p_CNMa	0.551106	18.3409	0.0211	0.00287505	0.0186855	6.41204	2.84865	2.2509	HC_cycler	LD
CG10077	1:DN1p_CNMa	0.500316	17.0175	0.0444	0.00293383	0.0190061	12.4846	7.79902	1.60079	HC_cycler	LD
Nedd4	1:DN1p_CNMa	0.664052	9.18058	0.0056	0.00299376	0.0193321	1.23567	0.436429	2.83132	HC_cycler	LD
kek6	1:DN1p_CNMa	0.69549	13.3552	0.0088	0.00303023	0.019505	1.47779	0.506009	2.92048	HC_cycler	LD
CG42346	1:DN1p_CNMa	0.549072	20.724	0.0377	0.00306716	0.0196484	0.99174	0.320207	3.09718	HC_cycler	LD
Stat92E	1:DN1p_CNMa	0.617545	8.33213	0.0125	0.00309199	0.019776	1.88831	0.747391	2.52653	HC_cycler	LD
Ca-alpha1T	1:DN1p_CNMa	0.561633	15.2864	0.0346	0.00319321	0.0203586	4.71803	2.07668	2.27192	HC_cycler	LD
mim	1:DN1p_CNMa	0.587182	20.8013	0.0113	0.00327114	0.0207568	1.40907	0.328761	4.28601	HC_cycler	LD
COX5B	1:DN1p_CNMa	0.528137	18.7573	0.0083	0.0033374	0.0211439	2.21759	0.951056	2.33172	HC_cycler	LD
Hipk	1:DN1p_CNMa	0.633899	18.3718	0.0137	0.00364413	0.022659	14.5909	8.82097	1.65411	HC_cycler	LD
Droj2	1:DN1p_CNMa	0.527175	8.09308	0.0214	0.00386808	0.0239773	4.58826	2.26422	2.02641	HC_cycler	LD
Cctgamma	1:DN1p_CNMa	0.862554	6.0576	0.0006	0.00407237	0.0250124	1.05976	0.29654	3.57375	HC_cycler	LD
Ank	1:DN1p_CNMa	0.628284	9.2736	0.019	0.00410468	0.0250578	1.38425	0.480205	2.88261	HC_cycler	LD
Cct1	1:DN1p_CNMa	0.506478	17.1121	0.0348	0.00440632	0.0266566	2.90075	1.43784	2.01743	HC_cycler	LD
shakB	1:DN1p_CNMa	0.588999	4.36758	0.024	0.00456475	0.0273681	5.53213	2.48368	2.22739	HC_cycler	LD
RpL27	1:DN1p_CNMa	0.6476	3.73176	0.013	0.00470996	0.0280298	4.89147	2.64433	1.84979	HC_cycler	LD
CG13594	1:DN1p_CNMa	0.547159	12.8541	0.0191	0.00489748	0.0289318	1.41972	0.678032	2.09388	HC_cycler	LD
ssx	1:DN1p_CNMa	0.530274	19.3043	0.0304	0.00495504	0.0291861	3.18343	1.61036	1.97684	HC_cycler	LD
CG30116	1:DN1p_CNMa	0.562869	3.81721	0.0253	0.00505245	0.0297164	1.834	0.72926	2.51488	HC_cycler	LD
CG32085	1:DN1p_CNMa	0.618243	2.77418	0.0062	0.00539688	0.0312398	0.929603	0.219377	4.23746	HC_cycler	LD
CG6123	1:DN1p_CNMa	0.584481	1.27006	0.0231	0.00548103	0.0314553	2.19424	0.698635	3.14075	HC_cycler	LD
RpS24	1:DN1p_CNMa	0.52813	5.80473	0.0164	0.00563125	0.0321797	3.8172	1.92042	1.98769	HC_cycler	LD
Hsp70Aa	1:DN1p_CNMa	0.505225	11.2918	0.0397	0.00569673	0.0324617	6.60454	2.60751	2.53289	HC_cycler	LD
CG15547	1:DN1p_CNMa	0.509824	9.86903	0.0161	0.00603505	0.0337677	1.31472	0.638237	2.05993	HC_cycler	LD
ens	1:DN1p_CNMa	0.558818	5.97852	0.0315	0.00608153	0.0339806	2.79857	1.43	1.95704	HC_cycler	LD
CR43334	1:DN1p_CNMa	0.51452	18.6428	0.0496	0.00658987	0.0359228	0.856067	0.168535	5.07945	HC_cycler	LD
CG13408	1:DN1p_CNMa	0.534019	2.14187	0.0343	0.0074403	0.0399631	1.50053	0.639205	2.34749	HC_cycler	LD
CG1275	1:DN1p_CNMa	0.591287	5.03573	0.028	0.00758201	0.0405618	2.07433	1.00134	2.07156	HC_cycler	LD
CG34155	1:DN1p_CNMa	0.601934	9.25726	0.0016	0.00817385	0.0430975	0.922075	0.100174	9.20475	HC_cycler	LD
CG17734	1:DN1p_CNMa	0.590059	2.19201	0.023	0.00835951	0.0437895	0.956784	0.235495	4.06286	HC_cycler	LD
Pglym78	1:DN1p_CNMa	0.624114	21.3423	0.0156	0.00835951	0.0437895	3.44084	1.0581	3.25191	HC_cycler	LD
FMRFaR	1:DN1p_CNMa	0.717573	19.932	0.0054	0.00839078	0.0438961	1.09205	0.336138	3.24882	HC_cycler	LD
Frq1	1:DN1p_CNMa	0.527903	22.3364	0.0325	0.0086131	0.0446527	4.48216	2.30536	1.94424	HC_cycler	LD
CG11665	1:DN1p_CNMa	0.694593	14.1753	0.006	0.00887374	0.0458857	1.64888	0.631025	2.61301	HC_cycler	LD
Nf1	1:DN1p_CNMa	0.739442	16.2174	0.0009	0.00890677	0.0459384	2.57251	1.25857	2.04399	HC_cycler	LD
ND-PDSW	1:DN1p_CNMa	0.550214	18.5657	0.0391	0.00914161	0.0468493	0.887295	0.245216	3.61843	HC_cycler	LD
CG12239	1:DN1p_CNMa	0.500211	18.7525	0.0055	0.00927831	0.0472489	57.0167	2.4421	23.3474	HC_cycler	LD
PlexA	1:DN1p_CNMa	0.525656	9.74998	0.0323	0.00966392	0.0489031	4.2768	2.42625	1.76272	HC_cycler	LD
Hsp23	1:DN1p_CNMa	0.521697	20.8008	0.0419	0.00988043	0.0497484	8.69494	5.02373	1.73077	HC_cycler	LD
CG15628	12:LNd	0.892942	13.4858	0.0001	1.19148e-18	4.79332e-15	29.4594	2.20181	13.3796	HC_cycler	LD
tim	12:LNd	0.874918	15.0509	0.0003	4.46306e-16	8.97745e-13	37.2108	2.07049	17.9719	HC_cycler	LD
FBgn0284248	12:LNd	0.809417	2.17349	0.0002	1.6519e-15	2.21519e-12	7.43948	0.939086	7.92205	HC_cycler	LD
Argk	12:LNd	0.953514	4.87183	0.0001	8.8269e-15	8.87765e-12	16.8815	1.3808	12.2259	HC_cycler	LD
CG17777	12:LNd	0.874915	23.0424	0.0003	1.87233e-14	1.50648e-11	18.6528	0.302249	61.7134	HC_cycler	LD
Pdp1	12:LNd	0.811687	16.7747	0.0004	1.3982e-13	9.37492e-11	140.881	31.6534	4.45075	HC_cycler	LD
vri	12:LNd	0.860529	13.3142	0.0014	2.757e-10	1.58448e-07	10.8225	0.773669	13.9885	HC_cycler	LD
nmo	12:LNd	0.841152	5.43256	0.0007	5.48406e-10	2.45138e-07	26.0487	7.80611	3.33697	HC_cycler	LD
Rbp6	12:LNd	0.67487	0.149938	0.0007	5.48406e-10	2.45138e-07	37.791	12.255	3.08373	HC_cycler	LD
Ac13E	12:LNd	0.620465	2.17095	0.0007	5.21573e-09	2.09829e-06	13.304	1.84841	7.19751	HC_cycler	LD
CG32547	12:LNd	0.751587	13.1814	0.0002	8.66082e-09	3.1675e-06	5.52095	0.90348	6.11076	HC_cycler	LD
CG33543	12:LNd	0.58613	3.85884	0.0207	1.27228e-08	4.26533e-06	7.85164	0.773205	10.1547	HC_cycler	LD
CG34357	12:LNd	0.778473	3.72985	0.0011	2.91155e-08	8.36656e-06	6.29024	0.567251	11.089	HC_cycler	LD
nvy	12:LNd	0.883013	9.66389	0.0003	2.80739e-08	8.36656e-06	4.31321	0.701895	6.1451	HC_cycler	LD
CG11030	12:LNd	0.874933	14.3667	0.0002	3.1353e-08	8.40888e-06	4.2868	0.254444	16.8477	HC_cycler	LD
CG31324	12:LNd	0.736257	14.1332	0.0052	4.20751e-08	9.76006e-06	5.06073	0.364056	13.9009	HC_cycler	LD
Dscam2	12:LNd	0.588664	2.80218	0.008	4.36692e-08	9.76006e-06	7.96781	1.5434	5.16249	HC_cycler	LD
tna	12:LNd	0.759781	3.15611	0.0003	4.05895e-08	9.76006e-06	10.9287	1.71491	6.37273	HC_cycler	LD
chrb	12:LNd	0.675198	9.78204	0.0003	6.98653e-08	1.47931e-05	52.4816	11.9699	4.38446	HC_cycler	LD
dpr3	12:LNd	0.637626	15.5852	0.0037	7.50556e-08	1.49111e-05	3.42683	0.0624126	54.906	HC_cycler	LD
PVRAP	12:LNd	0.725854	11.5568	0.0046	7.78356e-08	1.49111e-05	4.95504	0.467887	10.5903	HC_cycler	LD
SK	12:LNd	0.809647	13.9467	0.0015	1.32229e-07	2.21648e-05	21.5091	6.79122	3.1672	HC_cycler	LD
CG11566	12:LNd	0.695487	12.5306	0.004	1.57523e-07	2.43736e-05	1.49532	0.0711552	21.015	HC_cycler	LD
CG13954	12:LNd	0.645867	9.47052	0.0022	3.82904e-07	5.50151e-05	16.3991	3.59381	4.56315	HC_cycler	LD
sprt	12:LNd	0.641404	21.0783	0.0166	3.70058e-07	5.50151e-05	3.82457	0.391216	9.77611	HC_cycler	LD
CG43066	12:LNd	0.635058	5.62111	0.0168	4.23149e-07	5.87009e-05	10.2522	2.49985	4.10112	HC_cycler	LD
CG42732	12:LNd	0.753689	14.2525	0.0007	5.52064e-07	7.16436e-05	3.01932	0.23587	12.8008	HC_cycler	LD
Fife	12:LNd	0.759168	5.1201	0.0034	6.29892e-07	7.91892e-05	14.9372	4.57713	3.26344	HC_cycler	LD
rdx	12:LNd	0.569973	11.2139	0.0119	7.42411e-07	9.05066e-05	5.54528	1.58757	3.49294	HC_cycler	LD
CG31705	12:LNd	0.765222	11.0492	0.0008	1.16762e-06	0.000138157	3.02843	0.301674	10.0388	HC_cycler	LD
scyl	12:LNd	0.691599	8.7739	0.0033	1.70958e-06	0.000196504	27.7489	7.77841	3.56743	HC_cycler	LD
chn	12:LNd	0.813533	3.39719	0.0001	2.48752e-06	0.000277981	5.47363	1.58873	3.44529	HC_cycler	LD
CNMa	12:LNd	0.724177	16.6535	0.0001	2.72816e-06	0.000288826	13.5796	0.124825	108.789	HC_cycler	LD
Eip75B	12:LNd	0.740848	8.09907	0.001	2.90166e-06	0.000299317	17.6455	3.55756	4.95998	HC_cycler	LD
CG45186	12:LNd	0.709364	13.6023	0.0018	2.99366e-06	0.000301087	2.30786	0.370384	6.231	HC_cycler	LD
CG11221	12:LNd	0.639935	3.64386	0.0128	3.18322e-06	0.000312344	4.67826	0.631364	7.40977	HC_cycler	LD
Cbp53E	12:LNd	0.522761	9.3567	0.0418	3.82313e-06	0.000366201	7.92091	1.08948	7.27033	HC_cycler	LD
Proc	12:LNd	0.633656	3.13987	0.0114	5.48981e-06	0.000513616	7.52602	0.848213	8.87279	HC_cycler	LD
CG42784	12:LNd	0.670528	23.7204	0.0098	6.75835e-06	0.000604196	9.45884	2.72853	3.46665	HC_cycler	LD
Pde8	12:LNd	0.715503	11.3898	0.0066	7.17014e-06	0.000627075	5.23487	1.02599	5.10226	HC_cycler	LD
Eip93F	12:LNd	0.685672	1.3566	0.0085	8.55384e-06	0.000732172	14.4473	6.19249	2.33304	HC_cycler	LD
futsch	12:LNd	0.834123	9.88964	0.0005	1.07981e-05	0.000905019	52.4921	17.5014	2.9993	HC_cycler	LD
Pde11	12:LNd	0.886161	5.23307	0.0005	1.17808e-05	0.00096723	3.58557	0.750327	4.77867	HC_cycler	LD
bru-3	12:LNd	0.750178	2.40311	0.0025	2.02232e-05	0.00159526	90.6434	49.4922	1.83147	HC_cycler	LD
Usp7	12:LNd	0.757877	9.72948	0.0021	2.13899e-05	0.00162362	2.60816	0.842901	3.09426	HC_cycler	LD
wry	12:LNd	0.632826	1.10807	0.0153	2.39178e-05	0.00178188	3.50654	0.704208	4.97941	HC_cycler	LD
ITP	12:LNd	0.580549	14.692	0.0315	2.46017e-05	0.0017995	9.9981	1.81356	5.51297	HC_cycler	LD
dpr17	12:LNd	0.678822	10.8487	0.0029	2.67276e-05	0.00192009	2.41515	0.45815	5.27153	HC_cycler	LD
14-3-3zeta	12:LNd	0.514654	8.83761	0.0474	3.33139e-05	0.00227155	49.5477	19.5907	2.52915	HC_cycler	LD
CR44320	12:LNd	0.591235	13.738	0.0075	3.33139e-05	0.00227155	4.59772	0.529815	8.67798	HC_cycler	LD
CR45316	12:LNd	0.661254	23.2221	0.0066	3.24251e-05	0.00227155	4.44042	0.0500085	88.7933	HC_cycler	LD
Ant2	12:LNd	0.535338	3.38232	0.0302	4.37213e-05	0.00288345	19.0676	7.58956	2.51234	HC_cycler	LD
Gyc88E	12:LNd	0.780951	12.2641	0.0014	4.74172e-05	0.00298062	1.06637	0.0304133	35.0625	HC_cycler	LD
mib2	12:LNd	0.713437	11.3779	0.0041	5.27831e-05	0.00321737	1.92397	0.23995	8.01819	HC_cycler	LD
Nhe2	12:LNd	0.649662	3.0776	0.0092	6.35613e-05	0.00381653	4.82968	0.566487	8.52566	HC_cycler	LD
CG8745	12:LNd	0.885571	4.52111	0.0001	6.5286e-05	0.00386243	3.15284	0.551473	5.71712	HC_cycler	LD
kug	12:LNd	0.704175	0.199341	0.0078	7.44471e-05	0.00427858	9.21378	2.42921	3.79292	HC_cycler	LD
fne	12:LNd	0.639689	4.99275	0.0147	9.17221e-05	0.00505477	37.6108	17.9462	2.09575	HC_cycler	LD
Npc2b	12:LNd	0.506549	17.7823	0.004	0.000107093	0.00582212	2.88313	0	2.1	HC_cycler	LD
pHCl	12:LNd	0.621073	16.7101	0.0099	0.000109915	0.00589583	3.74835	0.439051	8.53739	HC_cycler	LD
CR44999	12:LNd	0.59814	15.9354	0.0134	0.000118659	0.00628111	21.641	7.57777	2.85585	HC_cycler	LD
5-HT2A	12:LNd	0.64159	16.4612	0.0037	0.000134816	0.0070437	2.62105	0.533044	4.91714	HC_cycler	LD
AstC-R2	12:LNd	0.591874	3.85093	0.0116	0.000160833	0.00829525	8.70875	1.40521	6.19749	HC_cycler	LD
CG32432	12:LNd	0.548354	0.601274	0.0251	0.00018233	0.0091689	1.33352	0.0528688	25.2233	HC_cycler	LD
Thor	12:LNd	0.534828	8.84902	0.0076	0.000245301	0.011475	3.37868	0.297848	11.3436	HC_cycler	LD
CG34370	12:LNd	0.56863	6.01163	0.0354	0.000263898	0.0120644	6.85473	1.72855	3.9656	HC_cycler	LD
CG32700	12:LNd	0.742494	7.00781	0.0025	0.000270487	0.0122266	7.9017	2.39757	3.29571	HC_cycler	LD
cry	12:LNd	0.608565	4.78704	0.0204	0.00029087	0.0130019	3.8802	0.565964	6.85591	HC_cycler	LD
CG7985	12:LNd	0.735206	10.331	0.0007	0.000336222	0.0147024	1.08447	0.110536	9.81096	HC_cycler	LD
Dscam3	12:LNd	0.58447	21.5329	0.0097	0.000361409	0.0156338	2.86467	0.116643	24.5594	HC_cycler	LD
chinmo	12:LNd	0.520008	4.20183	0.0289	0.000388149	0.0164371	9.29826	2.63396	3.53014	HC_cycler	LD
CG10413	12:LNd	0.50674	10.609	0.0091	0.000416958	0.0169437	1.06917	0.109691	9.74714	HC_cycler	LD
CG4467	12:LNd	0.607258	11.837	0.0139	0.000426848	0.0171721	8.07039	3.33056	2.42313	HC_cycler	LD
dysc	12:LNd	0.831026	11.4212	0.0003	0.000447527	0.0178258	14.1131	7.53795	1.87228	HC_cycler	LD
app	12:LNd	0.554322	4.62166	0.0358	0.000458334	0.0179017	3.29934	0.381153	8.6562	HC_cycler	LD
Rab3-GEF	12:LNd	0.608343	6.23477	0.0138	0.000458334	0.0179017	3.1031	1.32159	2.34801	HC_cycler	LD
MYPT-75D	12:LNd	0.897544	14.0298	0.0001	0.000491731	0.0188403	2.50377	0.603902	4.14599	HC_cycler	LD
Glut1	12:LNd	0.539466	9.85497	0.0038	0.000515336	0.0190202	14.0314	4.06072	3.45539	HC_cycler	LD
RapGAP1	12:LNd	0.611877	22.2839	0.019	0.000515336	0.0190202	2.23284	0.412053	5.4188	HC_cycler	LD
crp	12:LNd	0.572913	12.2337	0.034	0.000552881	0.0202204	2.89551	0.819787	3.53202	HC_cycler	LD
Cka	12:LNd	0.504211	10.7158	0.0487	0.000620779	0.0222982	4.28935	1.73306	2.47502	HC_cycler	LD
fru	12:LNd	0.587326	5.01057	0.0279	0.00078098	0.0266261	30.4175	8.69504	3.49826	HC_cycler	LD
HmgZ	12:LNd	0.573682	15.5315	0.0274	0.000799158	0.0267918	6.58364	2.71704	2.42309	HC_cycler	LD
vib	12:LNd	0.562929	4.89152	0.0264	0.000915474	0.0301881	6.25559	1.3812	4.5291	HC_cycler	LD
CG32647	12:LNd	0.802566	20.3656	0.0001	0.000957631	0.0313215	5.0119	1.584	3.16409	HC_cycler	LD
Dyrk2	12:LNd	0.6312	3.14182	0.004	0.00100159	0.0322353	6.98704	1.12426	6.21479	HC_cycler	LD
porin	12:LNd	0.612035	5.571	0.0131	0.00104743	0.0334429	9.62986	4.5248	2.12824	HC_cycler	LD
Appl	12:LNd	0.508264	12.1452	0.0324	0.00111961	0.0351888	21.7752	11.1511	1.95273	HC_cycler	LD
Best1	12:LNd	0.672844	1.93517	0.0016	0.00111961	0.0351888	1.9182	0.287095	6.6814	HC_cycler	LD
CG7029	12:LNd	0.521029	13.3626	0.0391	0.00125104	0.0384193	5.15739	1.96901	2.61928	HC_cycler	LD
kek1	12:LNd	0.721348	2.45018	0.0013	0.00125104	0.0384193	7.65749	1.74899	4.37823	HC_cycler	LD
CG13868	12:LNd	0.585966	13.8718	0.022	0.00130741	0.0395466	6.10515	0.801455	7.61758	HC_cycler	LD
cmet	12:LNd	0.529031	22.4562	0.0254	0.00133617	0.0398178	3.43994	0.0706404	48.6965	HC_cycler	LD
CadN2	12:LNd	0.609035	0.932455	0.0116	0.0014585	0.0425185	3.48405	0.876335	3.97571	HC_cycler	LD
chinmo	14:DN3	0.649383	4.71846	0.0078	8.3968e-06	0.0159892	7.37395	1.98139	3.7216	HC_cycler	LD
fne	14:DN3	0.641002	5.09475	0.0184	1.19234e-05	0.0159892	35.8326	17.7425	2.01959	HC_cycler	LD
tim	14:DN3	0.62245	15.01	0.0076	1.15872e-05	0.0159892	13.2307	1.54187	8.58093	HC_cycler	LD
Proc	15:DN1p_CNMa	0.69395	6.19855	0.0002	2.84567e-15	1.14481e-11	63.5628	0.0918544	691.996	HC_cycler	LD
Argk	15:DN1p_CNMa	0.805611	1.77457	0.0006	1.10309e-10	1.47924e-07	29.7572	3.83885	7.7516	HC_cycler	LD
CG45263	15:DN1p_CNMa	0.936447	13.0254	0.0001	1.10309e-10	1.47924e-07	18.0896	2.06398	8.76442	HC_cycler	LD
Pka-C1	15:DN1p_CNMa	0.813089	1.74677	0.001	1.29341e-09	1.30084e-06	32.8243	6.75141	4.86184	HC_cycler	LD
tim	15:DN1p_CNMa	0.900535	13.3008	0.0011	1.66655e-09	1.34091e-06	33.1785	1.18824	27.9224	HC_cycler	LD
eys	15:DN1p_CNMa	0.728368	11.1415	0.0001	5.59498e-09	3.75144e-06	12.115	0.584249	20.736	HC_cycler	LD
FBgn0284248	15:DN1p_CNMa	0.782406	2.50968	0.0017	8.94645e-09	5.14165e-06	9.32318	1.46647	6.35754	HC_cycler	LD
A2bp1	15:DN1p_CNMa	0.775426	11.0737	0.0002	1.41777e-08	7.1296e-06	23.5913	5.45142	4.32755	HC_cycler	LD
PVRAP	15:DN1p_CNMa	0.703452	11.5007	0.0001	1.78374e-08	7.97331e-06	8.21862	0.352548	23.312	HC_cycler	LD
dpr13	15:DN1p_CNMa	0.77382	10.4463	0.0001	2.22724e-08	8.96017e-06	14.3141	1.14864	12.4618	HC_cycler	LD
vri	15:DN1p_CNMa	0.825138	10.3793	0.0006	3.46923e-08	1.26879e-05	10.4902	0.685936	15.2932	HC_cycler	LD
SK	15:DN1p_CNMa	0.598124	11.2626	0.0034	6.18404e-08	2.0732e-05	27.7295	4.33406	6.39806	HC_cycler	LD
CG1607	15:DN1p_CNMa	0.672643	2.02821	0.0064	9.45103e-08	2.71582e-05	2.22505	0.0885983	25.1139	HC_cycler	LD
CG31705	15:DN1p_CNMa	0.609047	2.90669	0.0013	8.8316e-08	2.71582e-05	6.09069	0.133775	45.5294	HC_cycler	LD
CG31324	15:DN1p_CNMa	0.689242	12.971	0.0035	2.46733e-07	6.61737e-05	5.30397	0	2.1	HC_cycler	LD
CG42673	15:DN1p_CNMa	0.80191	11.2551	0.0002	2.64387e-07	6.64767e-05	3.4628	0	2.1	HC_cycler	LD
CG13054	15:DN1p_CNMa	0.713463	8.97531	0.0054	3.22138e-07	7.6233e-05	13.6242	1.61915	8.41444	HC_cycler	LD
hoe1	15:DN1p_CNMa	0.804301	10.7795	0.0002	3.44888e-07	7.70825e-05	2.66159	0.0459272	57.9525	HC_cycler	LD
CG17777	15:DN1p_CNMa	0.644775	19.7224	0.0095	4.77677e-07	0.000101142	13.812	0.488424	28.2788	HC_cycler	LD
Dop1R1	15:DN1p_CNMa	0.877068	10.6976	0.0003	5.10761e-07	0.00010274	12.1959	0.915102	13.3274	HC_cycler	LD
CG32052	15:DN1p_CNMa	0.795534	22.1133	0.0001	5.43844e-07	0.000104185	10.4214	1.09333	9.5318	HC_cycler	LD
Frq1	15:DN1p_CNMa	0.751097	1.09372	0.0027	7.03288e-07	0.000123014	9.56653	1.28493	7.44517	HC_cycler	LD
jeb	15:DN1p_CNMa	0.733203	0.460526	0.0013	7.03288e-07	0.000123014	22.0283	2.88559	7.63392	HC_cycler	LD
CG15628	15:DN1p_CNMa	0.739456	10.1327	0.0008	7.98835e-07	0.000133905	24.6678	3.42807	7.19582	HC_cycler	LD
CG14082	15:DN1p_CNMa	0.801297	10.5807	0.0005	8.5275e-07	0.000137225	5.36331	0.83884	6.39373	HC_cycler	LD
CG9705	15:DN1p_CNMa	0.773289	11.7129	0.0005	1.40639e-06	0.000217612	3.12783	0.115468	27.0882	HC_cycler	LD
HmgZ	15:DN1p_CNMa	0.791529	11.6392	0.0011	1.9077e-06	0.000274096	8.82932	1.18882	7.42697	HC_cycler	LD
sca	15:DN1p_CNMa	0.800457	13.581	0.0002	1.9077e-06	0.000274096	3.68006	0.140824	26.1322	HC_cycler	LD
CG4577	15:DN1p_CNMa	0.825363	1.67736	0.0013	2.15392e-06	0.000288841	24.9209	5.18557	4.80583	HC_cycler	LD
svr	15:DN1p_CNMa	0.819632	5.05281	0.0022	2.15392e-06	0.000288841	16.8797	4.02651	4.19213	HC_cycler	LD
sky	15:DN1p_CNMa	0.578484	1.84592	0.0153	3.90963e-06	0.000507369	14.003	0.892167	15.6955	HC_cycler	LD
rdo	15:DN1p_CNMa	0.891158	10.2733	0.0004	4.39535e-06	0.000552578	2.53537	0	2.1	HC_cycler	LD
FBgn0285925	15:DN1p_CNMa	0.781083	23.1464	0.0003	4.93797e-06	0.000601983	21.5385	5.6598	3.80552	HC_cycler	LD
esn	15:DN1p_CNMa	0.785912	7.89816	0.0014	5.88163e-06	0.000695935	3.58915	0.409568	8.76326	HC_cycler	LD
shep	15:DN1p_CNMa	0.659464	0.57653	0.0006	6.21953e-06	0.00071489	45.1662	15.7378	2.86992	HC_cycler	LD
Clk	15:DN1p_CNMa	0.704069	2.10174	0.0024	7.3926e-06	0.000826124	5.71909	0.367726	15.5526	HC_cycler	LD
Mmp2	15:DN1p_CNMa	0.727349	1.9912	0.0033	8.27952e-06	0.00090023	16.0532	1.8666	8.60024	HC_cycler	LD
CG34136	15:DN1p_CNMa	0.648587	2.15995	0.0027	8.74676e-06	0.000926005	5.74839	0.0319051	180.172	HC_cycler	LD
CG13868	15:DN1p_CNMa	0.604661	9.82534	0.0219	1.22268e-05	0.00119972	4.94793	0.605244	8.1751	HC_cycler	LD
nAChRalpha6	15:DN1p_CNMa	0.74315	11.8129	0.0012	1.22268e-05	0.00119972	17.4865	3.91357	4.46818	HC_cycler	LD
Pde11	15:DN1p_CNMa	0.667291	2.90022	0.0007	1.22268e-05	0.00119972	5.13014	1.00807	5.08905	HC_cycler	LD
cwo	15:DN1p_CNMa	0.822959	9.35237	0.0008	1.29399e-05	0.00123946	5.9374	0.593612	10.0021	HC_cycler	LD
Nplp1	15:DN1p_CNMa	0.728552	6.64465	0.0053	1.52356e-05	0.00142541	17.4615	3.10159	5.62987	HC_cycler	LD
MYPT-75D	15:DN1p_CNMa	0.78325	10.6198	0.0027	1.69905e-05	0.00155347	1.34107	0	2.1	HC_cycler	LD
CG1688	15:DN1p_CNMa	0.61627	10.62	0.0013	1.79629e-05	0.00160589	3.85874	0.0459272	84.0186	HC_cycler	LD
CG6959	15:DN1p_CNMa	0.570946	16.2045	0.0081	1.89353e-05	0.00162078	3.11908	0.112031	27.8414	HC_cycler	LD
bru-3	15:DN1p_CNMa	0.779023	20.7496	0.0011	2.34731e-05	0.00196734	54.1629	23.8731	2.26878	HC_cycler	LD
Trpm	15:DN1p_CNMa	0.76319	11.6724	0.0014	2.47915e-05	0.00203544	5.15433	0.617373	8.34881	HC_cycler	LD
emc	15:DN1p_CNMa	0.793496	7.24972	0.0014	2.90246e-05	0.00228953	9.14005	1.72846	5.28796	HC_cycler	LD
Dh31	15:DN1p_CNMa	0.812578	4.92958	0.0017	3.22444e-05	0.00244754	72.3577	23.9967	3.01532	HC_cycler	LD
Trim9	15:DN1p_CNMa	0.60187	11.0864	0.0007	3.22444e-05	0.00244754	3.80064	0.0459272	82.7536	HC_cycler	LD
Bacc	15:DN1p_CNMa	0.722533	10.5379	0.0059	3.9721e-05	0.00285353	14.8507	6.03037	2.46265	HC_cycler	LD
Dh31-R	15:DN1p_CNMa	0.619116	20.707	0.001	3.9721e-05	0.00285353	4.90908	0.0279361	175.725	HC_cycler	LD
Sur-8	15:DN1p_CNMa	0.558076	2.1702	0.0019	3.9721e-05	0.00285353	8.97043	0.983091	9.12472	HC_cycler	LD
Pu	15:DN1p_CNMa	0.617757	9.45578	0.008	5.14346e-05	0.0036302	5.55515	0.814627	6.81926	HC_cycler	LD
CG15765	15:DN1p_CNMa	0.747071	12.6667	0.0035	5.40586e-05	0.00368606	13.9529	3.14094	4.44225	HC_cycler	LD
dpr8	15:DN1p_CNMa	0.615443	11.6329	0.0108	5.40586e-05	0.00368606	12.3248	2.28756	5.38777	HC_cycler	LD
Ggamma30A	15:DN1p_CNMa	0.534818	15.2253	0.036	5.98344e-05	0.00401189	5.93494	0.965213	6.14884	HC_cycler	LD
CG34356	15:DN1p_CNMa	0.539856	22.8764	0.0003	6.30109e-05	0.00415562	13.1042	0.638441	20.5253	HC_cycler	LD
Ant2	15:DN1p_CNMa	0.534273	22.3052	0.0416	6.61874e-05	0.00422654	27.7717	8.34596	3.32756	HC_cycler	LD
Usp8	15:DN1p_CNMa	0.660018	12.5854	0.0048	6.61874e-05	0.00422654	1.54408	0.0279361	55.2718	HC_cycler	LD
GstD1	15:DN1p_CNMa	0.638412	4.24464	0.0076	7.31712e-05	0.00452873	3.6157	0.237444	15.2276	HC_cycler	LD
Pdp1	15:DN1p_CNMa	0.656379	14.1073	0.0132	7.31712e-05	0.00452873	119.198	36.8119	3.23802	HC_cycler	LD
CG9674	15:DN1p_CNMa	0.686971	23.5922	0.0013	8.08437e-05	0.00492779	6.77126	1.40364	4.82408	HC_cycler	LD
CG34357	15:DN1p_CNMa	0.655541	10.912	0.0008	9.38897e-05	0.00563758	5.67063	0.557331	10.1746	HC_cycler	LD
CG8405	15:DN1p_CNMa	0.775657	20.3309	0.0004	9.85116e-05	0.00574365	5.55363	0.45212	12.2835	HC_cycler	LD
dlg1	15:DN1p_CNMa	0.626372	10.8276	0.0116	9.85116e-05	0.00574365	5.81382	2.42366	2.39878	HC_cycler	LD
chic	15:DN1p_CNMa	0.696774	7.51883	0.0031	0.000108649	0.00624421	7.09577	2.67677	2.65087	HC_cycler	LD
CG6024	15:DN1p_CNMa	0.753889	9.77148	0.0001	0.000114204	0.00638117	7.3873	1.19428	6.18556	HC_cycler	LD
Dscam4	15:DN1p_CNMa	0.519063	18.3735	0.0278	0.000114204	0.00638117	3.81508	0.352214	10.8317	HC_cycler	LD
CG3009	15:DN1p_CNMa	0.542176	11.1232	0.0172	0.00011976	0.00651072	0.929124	0	2.1	HC_cycler	LD
gol	15:DN1p_CNMa	0.535386	8.97202	0.0388	0.00011976	0.00651072	3.09697	0.39174	7.90567	HC_cycler	LD
dpr11	15:DN1p_CNMa	0.760794	17.9939	0.0013	0.000125845	0.0066615	1.95513	0.112155	17.4324	HC_cycler	LD
Dyrk2	15:DN1p_CNMa	0.502474	23.6611	0.0307	0.000125845	0.0066615	5.90244	0.334923	17.6233	HC_cycler	LD
CG6330	15:DN1p_CNMa	0.724245	21.0275	0.0005	0.000138592	0.00714815	2.6401	0.0754184	35.0061	HC_cycler	LD
Frq2	15:DN1p_CNMa	0.581098	5.39018	0.0179	0.000145254	0.00739691	6.08197	0.725402	8.38427	HC_cycler	LD
ed	15:DN1p_CNMa	0.581211	20.118	0.0067	0.000152543	0.00767098	4.88157	0.279933	17.4383	HC_cycler	LD
Df31	15:DN1p_CNMa	0.631384	11.0536	0.0084	0.000159831	0.00793829	10.9104	3.86039	2.82624	HC_cycler	LD
Mid1	15:DN1p_CNMa	0.590502	9.96005	0.0172	0.000193192	0.0092525	18.8414	4.23175	4.45239	HC_cycler	LD
nrv3	15:DN1p_CNMa	0.683977	22.3796	0.0093	0.000193192	0.0092525	46.4491	24.6969	1.88076	HC_cycler	LD
sm	15:DN1p_CNMa	0.663797	22.3162	0.0021	0.000193192	0.0092525	36.253	12.9508	2.79928	HC_cycler	LD
CG1275	15:DN1p_CNMa	0.574809	3.61851	0.0211	0.000212219	0.00992739	6.69876	1.92954	3.47169	HC_cycler	LD
kdn	15:DN1p_CNMa	0.63183	2.73886	0.0105	0.000212219	0.00992739	3.27138	0.817427	4.00204	HC_cycler	LD
Nckx30C	15:DN1p_CNMa	0.691999	19.1423	0.0051	0.000255649	0.0115559	11.4126	4.18792	2.72511	HC_cycler	LD
Pka-R1	15:DN1p_CNMa	0.525463	4.33018	0.0244	0.00029382	0.0129894	10.9864	1.55898	7.04717	HC_cycler	LD
CG30026	15:DN1p_CNMa	0.527504	3.88347	0.043	0.000307283	0.013437	1.51206	0.0664534	22.7537	HC_cycler	LD
Mnt	15:DN1p_CNMa	0.769595	13.444	0.0006	0.000403268	0.0174446	6.53482	3.01867	2.1648	HC_cycler	LD
Ccn	15:DN1p_CNMa	0.580353	20.8411	0.012	0.000422152	0.0180672	3.29799	0.471707	6.9916	HC_cycler	LD
HmgD	15:DN1p_CNMa	0.713133	12.9203	0.0049	0.000461558	0.0193422	1.0478	0.0850633	12.3179	HC_cycler	LD
fas	15:DN1p_CNMa	0.582703	9.34054	0.0152	0.000482081	0.0199939	10.2913	3.70913	2.77458	HC_cycler	LD
unc-13-4A	15:DN1p_CNMa	0.716384	10.5333	0.0011	0.000504372	0.0204958	6.26949	0.912229	6.87272	HC_cycler	LD
CG1943	15:DN1p_CNMa	0.588772	4.99522	0.0298	0.000601317	0.0239515	3.99331	0.86857	4.59757	HC_cycler	LD
GluRIB	15:DN1p_CNMa	0.813837	11.0472	0.0015	0.000601317	0.0239515	4.44941	0.695397	6.39838	HC_cycler	LD
FBgn0285944	15:DN1p_CNMa	0.623432	0.583334	0.0062	0.000627573	0.0242762	26.665	12.0004	2.22201	HC_cycler	LD
Fer1HCH	15:DN1p_CNMa	0.583549	17.8562	0.0069	0.000627573	0.0242762	8.52056	2.36253	3.60654	HC_cycler	LD
Lim1	15:DN1p_CNMa	0.760966	11.5415	0.0013	0.000627573	0.0242762	9.52858	4.74887	2.0065	HC_cycler	LD
sty	15:DN1p_CNMa	0.576694	1.82679	0.001	0.000684519	0.0259794	8.5702	1.60267	5.34744	HC_cycler	LD
pxb	15:DN1p_CNMa	0.621564	9.77735	0.0131	0.000779671	0.0290427	1.58862	0	2.1	HC_cycler	LD
igl	15:DN1p_CNMa	0.574876	10.6405	0.0182	0.000813101	0.0300101	25.1616	6.30686	3.98957	HC_cycler	LD
CG1695	15:DN1p_CNMa	0.531724	13.3418	0.0409	0.000849296	0.0307812	2.96838	0.7858	3.77753	HC_cycler	LD
Liprin-alpha	15:DN1p_CNMa	0.511987	7.51997	0.0254	0.000849296	0.0307812	2.33732	0.473437	4.93691	HC_cycler	LD
CG42342	15:DN1p_CNMa	0.591089	11.8783	0.0246	0.000885491	0.0312485	7.85099	0.925033	8.48726	HC_cycler	LD
Nlg2	15:DN1p_CNMa	0.522879	12.2991	0.0184	0.000885491	0.0312485	2.91527	0.329192	8.85584	HC_cycler	LD
CG9813	15:DN1p_CNMa	0.834114	21.6506	0.0023	0.000924658	0.032347	3.34617	0.492211	6.79825	HC_cycler	LD
cry	15:DN1p_CNMa	0.535613	4.1509	0.0383	0.000963826	0.0331408	5.69276	1.75249	3.24839	HC_cycler	LD
VGlut	15:DN1p_CNMa	0.69031	6.33175	0.0095	0.000963826	0.0331408	37.2847	17.5809	2.12076	HC_cycler	LD
CG8177	15:DN1p_CNMa	0.663244	12.1158	0.0067	0.00100619	0.0340159	3.61158	0.7121	5.07172	HC_cycler	LD
VepD	15:DN1p_CNMa	0.605929	10.4176	0.0035	0.00104855	0.0348621	2.14046	0.488029	4.38593	HC_cycler	LD
CanB2	15:DN1p_CNMa	0.690939	13.1458	0.001	0.00109434	0.035793	2.05123	0.357573	5.73654	HC_cycler	LD
CG31712	15:DN1p_CNMa	0.654143	9.94135	0.0031	0.00109434	0.035793	2.35829	0.682877	3.45346	HC_cycler	LD
CD98hc	15:DN1p_CNMa	0.595089	4.03428	0.0205	0.00114014	0.0366942	2.72139	0.547685	4.9689	HC_cycler	LD
CG31221	15:DN1p_CNMa	0.612668	17.2761	0.0016	0.00123909	0.0389442	11.0757	0.970894	11.4077	HC_cycler	LD
CG9795	15:DN1p_CNMa	0.901861	7.18382	0.0003	0.00123909	0.0389442	1.20599	0.0546961	22.0488	HC_cycler	LD
Cam	15:DN1p_CNMa	0.600316	20.3722	0.0214	0.00134595	0.0416519	112.264	37.2514	3.01369	HC_cycler	LD
SoxN	15:DN1p_CNMa	0.796731	8.48121	0.0019	0.00134595	0.0416519	5.28749	0.584249	9.05006	HC_cycler	LD
mAChR-B	15:DN1p_CNMa	0.56338	20.0993	0.0131	0.00146128	0.0445358	3.26299	0.214367	15.2215	HC_cycler	LD
tim	18:DN1p	0.883341	15.2222	0.0002	2.94213e-11	1.18362e-07	22.3536	0.656616	34.0437	HC_cycler	LD
Pka-R1	18:DN1p	0.728493	2.84014	0.0001	2.05655e-06	0.00206837	13.1719	1.57066	8.3862	HC_cycler	LD
Dop1R1	18:DN1p	0.761113	15.7707	0.0011	5.58566e-06	0.00449423	4.74153	0.446388	10.622	HC_cycler	LD
CG32052	18:DN1p	0.840386	0.570714	0.0007	9.02509e-06	0.00605132	5.72769	0.616482	9.29093	HC_cycler	LD
CG1402	18:DN1p	0.814976	0.490626	0.0015	2.521e-05	0.0124493	9.82439	1.85502	5.29612	HC_cycler	LD
CR45316	18:DN1p	0.820093	22.0207	0.0009	8.82496e-05	0.0322753	3.8057	0	2.1	HC_cycler	LD
tim	19:DN2	0.832889	15.0077	0.0005	1.87067e-11	7.5257e-08	26.8822	0.590392	45.5328	HC_cycler	LD
CG1402	19:DN2	0.818804	1.19209	0.0001	2.69651e-08	5.42402e-05	17.5692	1.75681	10.0006	HC_cycler	LD
CG9850	19:DN2	0.735167	3.24619	0.0007	6.02913e-07	0.000736468	5.13563	0.0541448	94.8499	HC_cycler	LD
Pka-R1	19:DN2	0.688677	3.15492	0.0002	2.6793e-06	0.00215215	18.5348	1.73698	10.6707	HC_cycler	LD
CG14082	19:DN2	0.785227	12.2424	0.0033	3.82629e-06	0.00219902	3.04805	0.0770321	39.5686	HC_cycler	LD
Argk	19:DN2	0.680153	2.18542	0.0101	5.13245e-06	0.00258098	10.0453	2.25611	4.45247	HC_cycler	LD
CG32683	19:DN2	0.592238	3.30871	0.0197	6.83289e-06	0.0030543	4.58068	0.853642	5.36604	HC_cycler	LD
CG11319	19:DN2	0.74315	2.673	0.0003	7.65725e-06	0.00308051	23.9615	2.00863	11.9293	HC_cycler	LD
vri	19:DN2	0.687499	14.9869	0.0099	1.76371e-05	0.00645036	11.385	0.61604	18.4809	HC_cycler	LD
CG7702	19:DN2	0.645167	21.7913	0.012	1.96536e-05	0.00658887	2.89145	0.0579979	49.8545	HC_cycler	LD
Dop1R2	19:DN2	0.554867	1.42961	0.0193	2.18866e-05	0.00677306	8.86293	0.715489	12.3872	HC_cycler	LD
nAChRalpha6	19:DN2	0.804715	13.689	0.0016	2.56556e-05	0.00737233	15.9401	5.71493	2.7892	HC_cycler	LD
bru-3	19:DN2	0.614914	0.590482	0.0065	3.16967e-05	0.00791524	103.059	41.1006	2.50747	HC_cycler	LD
CG4577	19:DN2	0.569208	3.85663	0.0282	3.16967e-05	0.00791524	13.3359	2.65406	5.0247	HC_cycler	LD
Clk	19:DN2	0.793896	2.19131	0.0013	3.34475e-05	0.00791524	8.38479	0.12945	64.7725	HC_cycler	LD
fne	19:DN2	0.773076	2.60878	0.0008	3.90623e-05	0.00827092	39.2591	15.1713	2.58773	HC_cycler	LD
mbl	19:DN2	0.661415	1.16262	0.0032	3.71302e-05	0.00827092	13.8814	2.21346	6.27134	HC_cycler	LD
kug	19:DN2	0.75372	22.8223	0.0007	4.33237e-05	0.00871456	11.3232	0.266873	42.4291	HC_cycler	LD
hts	19:DN2	0.805898	11.1485	0.0001	5.88887e-05	0.0107686	4.28763	0.527767	8.1241	HC_cycler	LD
Pdp1	19:DN2	0.558157	14.7516	0.032	7.96114e-05	0.0139251	164.877	72.7197	2.26729	HC_cycler	LD
Sox21b	19:DN2	0.816377	4.7461	0.0011	9.70459e-05	0.0162673	5.1605	1.47321	3.5029	HC_cycler	LD
chinmo	19:DN2	0.820484	3.79759	0.003	0.000143195	0.0205741	11.0418	2.97448	3.71216	HC_cycler	LD
slgA	19:DN2	0.757522	5.28371	0.0014	0.000143195	0.0205741	8.32057	3.45427	2.40878	HC_cycler	LD
CG32052	19:DN2	0.844903	1.70179	0.0012	0.000150394	0.0208633	4.27697	0.382469	11.1825	HC_cycler	LD
CG13203	19:DN2	0.679105	21.2813	0.0033	0.000219618	0.0252436	4.45493	0.334345	13.3244	HC_cycler	LD
CG9705	19:DN2	0.641821	13.9186	0.0087	0.000219618	0.0252436	3.63399	0.429573	8.45955	HC_cycler	LD
chn	19:DN2	0.70036	1.20223	0.0083	0.000209354	0.0252436	12.3579	2.31753	5.33234	HC_cycler	LD
sNPF	19:DN2	0.733845	20.7538	0.0044	0.000317837	0.0355182	5.68318	1.33005	4.27291	HC_cycler	LD
Rbp9	19:DN2	0.523221	4.06185	0.0483	0.000416958	0.0430109	7.2039	1.61095	4.47182	HC_cycler	LD
Syn	19:DN2	0.586049	2.50885	0.0089	0.000416958	0.0430109	11.7104	3.85912	3.03449	HC_cycler	LD
CG32369	19:DN2	0.723631	2.43764	0.0033	0.000476257	0.0467313	4.21658	0.409616	10.294	HC_cycler	LD
dpr13	19:DN2	0.590077	13.0199	0.0005	0.000476257	0.0467313	12.2612	2.48439	4.93531	HC_cycler	LD
tim	2:s_LNv	0.940139	15.2453	0.0001	2.96441e-49	1.19258e-45	35.781	1.49927	23.8655	HC_cycler	LD
Pdp1	2:s_LNv	0.97399	15.7604	0.0002	2.6024e-38	5.23473e-35	109.44	23.8712	4.58459	HC_cycler	LD
Dh31	2:s_LNv	0.943217	6.5096	0.0001	9.17957e-37	1.23098e-33	11.051	0.845242	13.0744	HC_cycler	LD
chrb	2:s_LNv	0.85682	8.12623	0.0003	8.39265e-36	8.44091e-33	106.041	17.6694	6.00136	HC_cycler	LD
CR44320	2:s_LNv	0.908501	12.9228	0.0001	2.46782e-34	1.98561e-31	13.6285	0.727636	18.7298	HC_cycler	LD
CG31705	2:s_LNv	0.852286	8.80299	0.0002	5.36194e-34	3.59518e-31	20.2394	1.17898	17.1669	HC_cycler	LD
sNPF	2:s_LNv	0.843581	20.1625	0.0002	2.29261e-33	1.31759e-30	13.7481	0.27557	49.8897	HC_cycler	LD
CG43729	2:s_LNv	0.920386	4.8126	0.0001	5.73308e-33	2.88302e-30	32.6035	6.76354	4.82048	HC_cycler	LD
mamo	2:s_LNv	0.933045	6.35937	0.0002	1.03726e-32	4.63654e-30	103.014	24.7598	4.16056	HC_cycler	LD
pog	2:s_LNv	0.935451	5.95493	0.0001	2.13148e-31	8.57494e-29	8.12097	1.23532	6.57401	HC_cycler	LD
CG15628	2:s_LNv	0.767409	12.8218	0.0001	8.96847e-31	3.28001e-28	27.0374	3.4809	7.76735	HC_cycler	LD
PVRAP	2:s_LNv	0.771197	8.06132	0.0015	1.30403e-30	4.37175e-28	17.3801	0.118694	146.428	HC_cycler	LD
Sdc	2:s_LNv	0.898317	19.4896	0.0001	8.74751e-30	2.70702e-27	25.3662	5.72515	4.43067	HC_cycler	LD
vri	2:s_LNv	0.923208	12.5663	0.0001	1.15001e-29	3.30465e-27	13.4212	0.395209	33.9597	HC_cycler	LD
CG43902	2:s_LNv	0.885876	4.83589	0.0003	1.33033e-29	3.56795e-27	62.0885	5.20186	11.9358	HC_cycler	LD
Sytbeta	2:s_LNv	0.91301	6.99566	0.0002	2.17143e-29	5.45978e-27	16.0708	1.53209	10.4895	HC_cycler	LD
Argk	2:s_LNv	0.885889	3.82859	0.0003	4.00788e-29	9.48452e-27	11.215	1.41562	7.92231	HC_cycler	LD
Dyrk2	2:s_LNv	0.801093	3.09939	0.0002	1.26269e-27	2.82212e-25	20.9334	1.26062	16.6056	HC_cycler	LD
sli	2:s_LNv	0.879623	7.34148	0.0003	2.18894e-27	4.63479e-25	7.30652	0.715081	10.2178	HC_cycler	LD
Appl	2:s_LNv	0.883091	10.2991	0.0004	3.64753e-26	7.337e-24	49.4492	15.1866	3.25612	HC_cycler	LD
robo3	2:s_LNv	0.795371	6.12007	0.0049	5.33443e-26	1.02192e-23	8.20827	0.450723	18.2113	HC_cycler	LD
Ald	2:s_LNv	0.740476	5.79306	0.0002	1.15311e-25	2.10862e-23	23.3827	4.79357	4.87794	HC_cycler	LD
Con	2:s_LNv	0.897123	6.32535	0.0011	1.21113e-25	2.11843e-23	8.80227	0.669358	13.1503	HC_cycler	LD
Nhe2	2:s_LNv	0.872635	1.14519	0.0001	6.38833e-25	1.07084e-22	6.91759	0.617646	11.1999	HC_cycler	LD
dpr1	2:s_LNv	0.710768	20.8298	0.0003	1.11544e-24	1.79497e-22	5.24692	0.507159	10.3457	HC_cycler	LD
Shab	2:s_LNv	0.958573	8.22765	0.0001	1.821e-24	2.81765e-22	8.56266	0.979943	8.73792	HC_cycler	LD
CG13054	2:s_LNv	0.92031	12.8383	0.0001	2.03356e-24	3.03e-22	10.2032	1.65176	6.17712	HC_cycler	LD
klg	2:s_LNv	0.62378	1.07462	0.0229	5.53349e-24	7.95044e-22	13.8539	1.76479	7.85014	HC_cycler	LD
amon	2:s_LNv	0.628565	3.83016	0.0053	3.2867e-23	4.55945e-21	18.6728	1.7485	10.6794	HC_cycler	LD
Nmdmc	2:s_LNv	0.765049	4.73899	0.0023	4.5864e-23	6.15036e-21	4.50775	0.10993	41.0055	HC_cycler	LD
rad	2:s_LNv	0.841786	3.45059	0.0004	4.94564e-23	6.41816e-21	17.526	5.27187	3.32444	HC_cycler	LD
CG42337	2:s_LNv	0.90516	11.812	0.0001	1.064e-22	1.33764e-20	10.8352	0.681449	15.9003	HC_cycler	LD
nmo	2:s_LNv	0.911251	5.55569	0.0005	1.25371e-22	1.52838e-20	36.5579	11.7765	3.1043	HC_cycler	LD
Dh31-R	2:s_LNv	0.721606	10.5626	0.0006	5.25062e-22	6.21271e-20	4.4339	0.135353	32.758	HC_cycler	LD
Pka-C1	2:s_LNv	0.810958	6.68366	0.0041	6.34746e-22	7.29595e-20	32.1197	6.8271	4.70473	HC_cycler	LD
rdx	2:s_LNv	0.817256	11.2665	0.0001	7.55966e-22	8.44792e-20	13.2257	2.64937	4.99201	HC_cycler	LD
Mkp3	2:s_LNv	0.790776	9.79844	0.0019	8.24868e-22	8.96877e-20	10.8797	1.52263	7.14533	HC_cycler	LD
tyf	2:s_LNv	0.856477	7.46982	0.0008	9.67747e-22	1.02454e-19	14.9147	3.54814	4.20353	HC_cycler	LD
HmgZ	2:s_LNv	0.848681	18.3097	0.0006	2.80672e-21	2.89524e-19	5.9943	0.957727	6.25888	HC_cycler	LD
CG1648	2:s_LNv	0.92965	5.65789	0.0001	6.30494e-21	6.3412e-19	2.69788	0.270741	9.96477	HC_cycler	LD
fas	2:s_LNv	0.930339	18.8384	0.0002	7.36373e-21	7.22544e-19	9.76239	2.12696	4.58984	HC_cycler	LD
Thor	2:s_LNv	0.877209	7.25836	0.0005	8.0128e-21	7.67512e-19	14.4099	0.599403	24.0405	HC_cycler	LD
Scp2	2:s_LNv	0.853989	14.9849	0.0001	1.18687e-20	1.11041e-18	7.98321	0.260588	30.6354	HC_cycler	LD
CG13594	2:s_LNv	0.714822	4.27649	0.0028	3.31672e-20	3.03254e-18	5.54608	0.411369	13.482	HC_cycler	LD
CG31324	2:s_LNv	0.636481	14.5263	0.0001	3.96632e-20	3.54589e-18	9.47843	0.3205	29.5739	HC_cycler	LD
Ac13E	2:s_LNv	0.909737	0.550648	0.0003	7.24317e-20	6.33462e-18	7.48732	1.50666	4.96948	HC_cycler	LD
CG42260	2:s_LNv	0.869837	4.79068	0.0013	8.07667e-20	6.91328e-18	8.68025	2.13302	4.06945	HC_cycler	LD
kuz	2:s_LNv	0.880226	2.68939	0.0001	1.10368e-19	9.25025e-18	8.39574	1.82598	4.59794	HC_cycler	LD
Clk	2:s_LNv	0.901821	3.07221	0.0001	1.16509e-19	9.5656e-18	4.90739	0.527912	9.29585	HC_cycler	LD
CG13868	2:s_LNv	0.774172	10.8465	0.0001	1.26355e-19	1.01665e-17	7.68307	0.900116	8.53565	HC_cycler	LD
cv-2	2:s_LNv	0.64477	5.22985	0.0123	4.27311e-19	3.37073e-17	4.63817	0.317491	14.6088	HC_cycler	LD
CG17777	2:s_LNv	0.9079	22.2867	0.0001	7.74265e-19	5.99013e-17	4.59254	0.201679	22.7715	HC_cycler	LD
CG11317	2:s_LNv	0.739324	19.0206	0.0003	8.26774e-19	6.27568e-17	7.27377	0.247321	29.4102	HC_cycler	LD
orb	2:s_LNv	0.865275	4.69274	0.0005	9.18292e-19	6.84128e-17	7.30386	0.835714	8.73966	HC_cycler	LD
SP2353	2:s_LNv	0.650336	10.9822	0.0121	1.48913e-18	1.06978e-16	8.64512	1.46865	5.88646	HC_cycler	LD
cry	2:s_LNv	0.901026	2.87111	0.0001	2.31442e-18	1.63349e-16	6.18938	0.887895	6.97084	HC_cycler	LD
CG14082	2:s_LNv	0.711805	13.5663	0.0001	2.59944e-18	1.77246e-16	4.15097	0.113597	36.5411	HC_cycler	LD
CG4577	2:s_LNv	0.698306	5.8079	0.0106	2.56632e-18	1.77246e-16	24.9681	5.88789	4.24058	HC_cycler	LD
CG42389	2:s_LNv	0.844372	6.50521	0.0029	2.70221e-18	1.81183e-16	10.6724	2.60605	4.09523	HC_cycler	LD
CG10960	2:s_LNv	0.690293	3.18747	0.0006	4.34604e-18	2.86625e-16	11.8068	0.696154	16.96	HC_cycler	LD
CG12541	2:s_LNv	0.844742	4.72287	0.0005	4.93872e-18	3.20459e-16	14.9601	4.25414	3.5166	HC_cycler	LD
CG6767	2:s_LNv	0.555976	10.7542	0.0023	6.53677e-18	4.1742e-16	13.12	1.88344	6.96598	HC_cycler	LD
CG13995	2:s_LNv	0.800737	5.64711	0.0056	8.75185e-18	5.50136e-16	3.55423	0.716941	4.95749	HC_cycler	LD
CG42346	2:s_LNv	0.706739	18.1763	0.007	9.93123e-18	6.14667e-16	3.28203	0.0811612	40.4384	HC_cycler	LD
CG1504	2:s_LNv	0.7582	6.16885	0.0032	1.27784e-17	7.78899e-16	3.76112	0.349266	10.7687	HC_cycler	LD
svr	2:s_LNv	0.678641	7.16775	0.0111	1.56218e-17	9.3801e-16	13.1716	2.41607	5.45164	HC_cycler	LD
CG2269	2:s_LNv	0.892154	19.8598	0.0002	2.60617e-17	1.54185e-15	105.571	41.0995	2.56867	HC_cycler	LD
A2bp1	2:s_LNv	0.730875	12.6136	0.0061	3.21859e-17	1.87658e-15	11.7948	4.00945	2.94176	HC_cycler	LD
CG43658	2:s_LNv	0.603258	13.5633	0.0035	3.77998e-17	2.17241e-15	6.0855	0.351924	17.2921	HC_cycler	LD
CG45263	2:s_LNv	0.825912	16.0633	0.0009	6.90505e-17	3.91254e-15	21.4373	7.07235	3.03114	HC_cycler	LD
Pura	2:s_LNv	0.632465	14.455	0.0001	4.90743e-16	2.74203e-14	2.10754	0.0324246	64.9983	HC_cycler	LD
Indy	2:s_LNv	0.808186	8.40749	0.0002	6.28863e-16	3.46564e-14	4.47063	0.962054	4.64697	HC_cycler	LD
mtt	2:s_LNv	0.790205	19.262	0.0006	1.05354e-15	5.72754e-14	3.00312	0.159444	18.835	HC_cycler	LD
Tbh	2:s_LNv	0.910359	21.7644	0.0006	1.07842e-15	5.78464e-14	14.0806	4.17164	3.37532	HC_cycler	LD
Cad87A	2:s_LNv	0.774979	5.7	0.0046	1.25474e-15	6.64186e-14	3.94361	0.497875	7.92087	HC_cycler	LD
scyl	2:s_LNv	0.802276	7.55557	0.0013	1.44255e-15	7.53684e-14	50.6144	16.3791	3.09017	HC_cycler	LD
bru-3	2:s_LNv	0.821009	20.7638	0.0002	1.73646e-15	8.95614e-14	55.8897	25.8027	2.16604	HC_cycler	LD
vib	2:s_LNv	0.817814	3.84715	0.001	1.92698e-15	9.81299e-14	9.84542	2.706	3.63837	HC_cycler	LD
fne	2:s_LNv	0.719098	0.430441	0.0021	4.65592e-15	2.34134e-13	27.2284	11.794	2.30866	HC_cycler	LD
Eip93F	2:s_LNv	0.686792	22.8096	0.0007	4.81767e-15	2.39278e-13	15.6161	3.1128	5.01674	HC_cycler	LD
app	2:s_LNv	0.773581	5.05942	0.0021	6.04365e-15	2.96508e-13	3.2592	0.175415	18.58	HC_cycler	LD
beat-Ia	2:s_LNv	0.942843	17.8752	0.0001	6.25182e-15	3.03025e-13	3.03434	0.297652	10.1943	HC_cycler	LD
CG31183	2:s_LNv	0.862394	15.9674	0.0007	7.32224e-15	3.50683e-13	2.15829	0.169609	12.7251	HC_cycler	LD
Eip75B	2:s_LNv	0.754822	9.67697	0.0003	8.47671e-15	4.01198e-13	12.1159	3.53395	3.42842	HC_cycler	LD
Calx	2:s_LNv	0.744452	16.012	0.0039	1.35641e-14	6.34516e-13	3.04622	0.400997	7.59663	HC_cycler	LD
Ant2	2:s_LNv	0.638227	0.0581637	0.014	2.16159e-14	9.99548e-13	18.9909	6.3495	2.99092	HC_cycler	LD
CG32700	2:s_LNv	0.754293	20.4108	0.0007	3.66354e-14	1.67482e-12	2.81157	0.536123	5.24427	HC_cycler	LD
Irk1	2:s_LNv	0.924694	11.6339	0.0001	3.95455e-14	1.78755e-12	3.31709	0.203629	16.2898	HC_cycler	LD
CG42394	2:s_LNv	0.621575	6.72722	0.015	8.35602e-14	3.73514e-12	9.04687	1.34741	6.71429	HC_cycler	LD
fru	2:s_LNv	0.864424	18.671	0.001	1.90102e-13	8.40417e-12	7.44658	2.67021	2.78876	HC_cycler	LD
CG13954	2:s_LNv	0.927884	11.6039	0.0001	2.37341e-13	1.02669e-11	12.4716	3.04151	4.10046	HC_cycler	LD
CadN	2:s_LNv	0.79955	14.0453	0.0029	2.44951e-13	1.04834e-11	10.1085	3.95666	2.55481	HC_cycler	LD
drl	2:s_LNv	0.722321	19.8818	0.0011	2.63699e-13	1.1167e-11	6.11375	0.64776	9.43829	HC_cycler	LD
14-3-3epsilon	2:s_LNv	0.782781	11.6682	0.0017	2.89844e-13	1.21463e-11	30.8297	17.0407	1.80918	HC_cycler	LD
pum	2:s_LNv	0.828792	4.33061	0.002	3.35668e-13	1.39216e-11	16.9748	7.62444	2.22636	HC_cycler	LD
chn	2:s_LNv	0.876897	1.91509	0.0001	3.92665e-13	1.61193e-11	4.60694	1.0185	4.52324	HC_cycler	LD
Mob2	2:s_LNv	0.753462	6.19684	0.0067	4.13664e-13	1.68098e-11	5.85726	1.58579	3.6936	HC_cycler	LD
CG42402	2:s_LNv	0.828504	14.8695	0.0004	4.3127e-13	1.735e-11	4.11442	0.962108	4.27646	HC_cycler	LD
CG42750	2:s_LNv	0.916188	3.8297	0.0004	4.73635e-13	1.86807e-11	5.09434	1.65413	3.07976	HC_cycler	LD
jeb	2:s_LNv	0.884147	5.43813	0.0005	4.73635e-13	1.86807e-11	13.5189	3.38737	3.99098	HC_cycler	LD
CNMa	2:s_LNv	0.875125	15.9016	0.0004	4.88608e-13	1.90842e-11	7.8299	0.410917	19.0547	HC_cycler	LD
ctrip	2:s_LNv	0.830716	12.1044	0.0009	4.93736e-13	1.9099e-11	8.4439	3.46361	2.43789	HC_cycler	LD
nrv1	2:s_LNv	0.617764	21.1116	0.0006	5.36476e-13	2.05547e-11	5.74498	0.203711	28.2016	HC_cycler	LD
sky	2:s_LNv	0.880568	6.33041	0.0003	6.33109e-13	2.40283e-11	5.71008	1.99587	2.86095	HC_cycler	LD
CG34353	2:s_LNv	0.76937	12.7591	0.0036	6.87624e-13	2.58534e-11	7.45405	2.10565	3.54003	HC_cycler	LD
igl	2:s_LNv	0.681747	7.14659	0.011	7.94291e-13	2.95874e-11	7.30309	1.81714	4.01901	HC_cycler	LD
CG1607	2:s_LNv	0.740869	4.5076	0.0031	1.19644e-12	4.41584e-11	1.64991	0.0682911	24.1599	HC_cycler	LD
Tob	2:s_LNv	0.929727	20.583	0.0001	1.20864e-12	4.42032e-11	6.01866	2.41868	2.48841	HC_cycler	LD
Eip63F-1	2:s_LNv	0.857257	11.9008	0.0002	1.37975e-12	5.00065e-11	4.07632	0.608465	6.69935	HC_cycler	LD
CG43373	2:s_LNv	0.747041	15.0469	0.0012	1.43699e-12	5.16162e-11	6.54256	0.843336	7.75795	HC_cycler	LD
2mit	2:s_LNv	0.761991	11.3907	0.0001	1.83257e-12	6.46705e-11	11.32	2.37896	4.75839	HC_cycler	LD
Pdfr	2:s_LNv	0.608892	12.7096	0.0173	1.9274e-12	6.74256e-11	18.8942	1.92769	9.80149	HC_cycler	LD
CG17816	2:s_LNv	0.735765	2.73022	0.0021	1.98675e-12	6.83136e-11	7.42744	2.24286	3.31159	HC_cycler	LD
CG30116	2:s_LNv	0.922664	7.28166	0.0001	2.00679e-12	6.8418e-11	4.04451	1.15899	3.48969	HC_cycler	LD
Eno	2:s_LNv	0.78799	7.64489	0.0009	2.04768e-12	6.92253e-11	10.8271	4.04997	2.67339	HC_cycler	LD
CG5065	2:s_LNv	0.737955	6.19503	0.0053	2.63302e-12	8.82721e-11	3.85811	0.870347	4.43284	HC_cycler	LD
CG32369	2:s_LNv	0.807982	21.6311	0.0013	3.02924e-12	1.00716e-10	3.40506	0.27718	12.2847	HC_cycler	LD
Hsromega	2:s_LNv	0.842065	5.20545	0.0005	3.18428e-12	1.05003e-10	60.1637	27.525	2.18579	HC_cycler	LD
AstC-R2	2:s_LNv	0.620229	20.8998	0.0067	3.21639e-12	1.052e-10	7.30068	0.685353	10.6524	HC_cycler	LD
CG44247	2:s_LNv	0.966126	3.69021	0.0002	3.51833e-12	1.14147e-10	7.15069	2.57296	2.77917	HC_cycler	LD
CRMP	2:s_LNv	0.800558	7.81545	0.0003	3.62525e-12	1.16675e-10	1.97466	0.301373	6.55221	HC_cycler	LD
CG42613	2:s_LNv	0.621301	15.724	0.0048	4.20812e-12	1.34359e-10	8.27353	1.90297	4.34769	HC_cycler	LD
PRL-1	2:s_LNv	0.8015	11.3988	0.0018	4.4662e-12	1.41477e-10	13.6393	3.88443	3.51127	HC_cycler	LD
5-HT1A	2:s_LNv	0.737539	16.3499	0.0029	4.55562e-12	1.43182e-10	4.42754	1.08927	4.06468	HC_cycler	LD
GABA-B-R3	2:s_LNv	0.66716	8.92686	0.0002	4.78713e-12	1.49292e-10	2.67683	0.0168648	158.723	HC_cycler	LD
Hsc70-3	2:s_LNv	0.878177	6.86214	0.0014	4.93114e-12	1.526e-10	11.4316	4.69568	2.4345	HC_cycler	LD
hig	2:s_LNv	0.761547	15.1827	0.0009	5.18128e-12	1.59117e-10	3.42851	0.609377	5.62626	HC_cycler	LD
Gclc	2:s_LNv	0.8011	20.7142	0.0004	5.28468e-12	1.59852e-10	2.83135	0.529478	5.34744	HC_cycler	LD
sprt	2:s_LNv	0.626886	22.3012	0.0118	5.89018e-12	1.76837e-10	3.89524	0.645883	6.03088	HC_cycler	LD
Atpalpha	2:s_LNv	0.568502	0.0927495	0.0255	7.75515e-12	2.29404e-10	66.0107	25.256	2.61367	HC_cycler	LD
l(1)G0196	2:s_LNv	0.861271	7.61649	0.0002	1.15672e-11	3.39671e-10	4.39614	1.16272	3.7809	HC_cycler	LD
Dscam4	2:s_LNv	0.58059	11.4209	0.0089	1.32483e-11	3.86216e-10	8.50001	1.86751	4.55152	HC_cycler	LD
CrebA	2:s_LNv	0.80618	5.57216	0.0026	2.64479e-11	7.65467e-10	7.69024	1.88746	4.07439	HC_cycler	LD
cpx	2:s_LNv	0.608576	22.6403	0.0187	3.82848e-11	1.10014e-09	20.6871	7.02633	2.94422	HC_cycler	LD
Trpm	2:s_LNv	0.62535	12.0254	0.0212	4.20725e-11	1.20041e-09	6.85079	1.81349	3.77768	HC_cycler	LD
Fife	2:s_LNv	0.700312	6.97492	0.0036	5.37157e-11	1.52182e-09	15.5746	5.35166	2.91023	HC_cycler	LD
FBgn0284248	2:s_LNv	0.805176	22.5132	0.0028	5.6293e-11	1.58368e-09	6.2979	2.41518	2.60764	HC_cycler	LD
sm	2:s_LNv	0.666539	20.2654	0.0093	6.35625e-11	1.77578e-09	30.4447	8.53008	3.5691	HC_cycler	LD
nrv3	2:s_LNv	0.593428	22.5283	0.0229	7.1084e-11	1.97221e-09	39.5414	18.8038	2.10284	HC_cycler	LD
CG42342	2:s_LNv	0.656552	15.0252	0.0018	7.51639e-11	2.07112e-09	4.70338	1.25947	3.73441	HC_cycler	LD
nAChRalpha3	2:s_LNv	0.736471	19.6235	0.0046	1.04895e-10	2.83217e-09	12.8309	2.6916	4.76701	HC_cycler	LD
br	2:s_LNv	0.504143	20.8318	0.0441	1.15016e-10	3.08472e-09	8.45337	0.301331	28.0535	HC_cycler	LD
Ran	2:s_LNv	0.77055	6.91389	0.0027	1.30801e-10	3.48484e-09	4.50517	1.81684	2.47967	HC_cycler	LD
Fur1	2:s_LNv	0.503409	16.6656	0.0381	1.9544e-10	5.13892e-09	2.37375	0.252181	9.41287	HC_cycler	LD
CG32137	2:s_LNv	0.888643	4.55084	0.0003	2.04522e-10	5.34282e-09	1.5328	0.0833352	18.3932	HC_cycler	LD
stai	2:s_LNv	0.735109	3.33918	0.0002	2.17912e-10	5.65586e-09	9.17457	3.63005	2.52739	HC_cycler	LD
CG15465	2:s_LNv	0.785226	23.7392	0.0002	2.25948e-10	5.78973e-09	22.1715	12.6217	1.75661	HC_cycler	LD
Mmp2	2:s_LNv	0.84733	7.62592	0.0005	2.25948e-10	5.78973e-09	18.6407	8.5671	2.17584	HC_cycler	LD
sff	2:s_LNv	0.716873	8.62843	0.0048	2.40721e-10	6.12925e-09	4.52027	1.1776	3.83854	HC_cycler	LD
Rab3-GEF	2:s_LNv	0.70291	5.21229	0.0031	2.68249e-10	6.7872e-09	8.99123	2.83784	3.16833	HC_cycler	LD
kdn	2:s_LNv	0.729652	3.237	0.0013	2.73126e-10	6.8674e-09	2.31909	0.561383	4.13104	HC_cycler	LD
Dap160	2:s_LNv	0.731235	2.38816	0.0001	3.01522e-10	7.53431e-09	4.36041	1.29232	3.3741	HC_cycler	LD
Hasp	2:s_LNv	0.74049	19.6759	0.0012	4.19861e-10	1.03626e-08	3.17844	0.662617	4.79681	HC_cycler	LD
CG32264	2:s_LNv	0.658066	20.6627	0.0129	4.46841e-10	1.09612e-08	25.9265	11.8874	2.18102	HC_cycler	LD
CG34155	2:s_LNv	0.831041	1.32672	0.0001	4.97107e-10	1.21204e-08	2.09092	0.103168	20.2671	HC_cycler	LD
CG9705	2:s_LNv	0.636332	13.3524	0.0013	5.06003e-10	1.21895e-08	1.80828	0.434035	4.1662	HC_cycler	LD
FBgn0284245	2:s_LNv	0.672232	11.6236	0.009	6.42438e-10	1.53841e-08	20.329	9.27332	2.19221	HC_cycler	LD
chinmo	2:s_LNv	0.568023	1.6463	0.0036	7.46032e-10	1.77591e-08	7.0412	1.04706	6.72474	HC_cycler	LD
nAChRalpha6	2:s_LNv	0.804063	18.5019	0.0001	9.44935e-10	2.22308e-08	8.78345	2.15959	4.06718	HC_cycler	LD
CG43066	2:s_LNv	0.734656	5.01903	0.0005	9.69951e-10	2.26867e-08	8.99524	3.65305	2.46239	HC_cycler	LD
HmgD	2:s_LNv	0.83155	17.1003	0.0002	1.03996e-09	2.41836e-08	2.62653	0.415883	6.31554	HC_cycler	LD
Rgk1	2:s_LNv	0.951036	5.90348	0.0001	1.04909e-09	2.42556e-08	1.60013	0.0744737	21.4858	HC_cycler	LD
Gapdh1	2:s_LNv	0.61928	6.59338	0.0035	1.20549e-09	2.77126e-08	4.4185	1.10397	4.00237	HC_cycler	LD
CG9850	2:s_LNv	0.552042	5.57088	0.0003	1.22657e-09	2.8037e-08	2.36298	0.0542124	43.5875	HC_cycler	LD
vig	2:s_LNv	0.822303	15.0222	0.0004	1.44553e-09	3.24881e-08	3.32834	1.03911	3.20308	HC_cycler	LD
sdk	2:s_LNv	0.509508	20.3633	0.0364	1.77709e-09	3.9718e-08	1.93921	0.0339565	57.1086	HC_cycler	LD
dlg1	2:s_LNv	0.824649	20.1361	0.0003	2.03809e-09	4.52997e-08	8.61223	3.29893	2.61061	HC_cycler	LD
CG33543	2:s_LNv	0.660343	5.8577	0.0092	2.07323e-09	4.58275e-08	2.4704	0.282343	8.74964	HC_cycler	LD
Pkc53E	2:s_LNv	0.891715	18.0942	0.0005	2.201e-09	4.83858e-08	1.98521	0.34758	5.71152	HC_cycler	LD
Pgi	2:s_LNv	0.644946	6.46208	0.0025	2.33624e-09	5.10799e-08	3.27671	0.721154	4.54371	HC_cycler	LD
l(1)G0320	2:s_LNv	0.843544	6.11453	0.0021	2.5655e-09	5.57891e-08	2.59645	0.962077	2.6988	HC_cycler	LD
CG9674	2:s_LNv	0.715179	2.72103	0.0025	2.67666e-09	5.78936e-08	3.65846	1.19971	3.04945	HC_cycler	LD
CG9065	2:s_LNv	0.760322	21.962	0.0005	4.58899e-09	9.76799e-08	1.36487	0.248086	5.50159	HC_cycler	LD
Dscam1	2:s_LNv	0.734783	19.0009	0.0032	4.94739e-09	1.04755e-07	3.26327	0.988312	3.30186	HC_cycler	LD
DIP-beta	2:s_LNv	0.79944	10.3659	0.0016	4.98867e-09	1.05076e-07	7.16667	0.839432	8.53753	HC_cycler	LD
beat-Ic	2:s_LNv	0.674014	7.49983	0.0048	5.15785e-09	1.08073e-07	7.18725	1.53681	4.67673	HC_cycler	LD
PyK	2:s_LNv	0.558525	4.34698	0.0262	9.04947e-09	1.8766e-07	3.12729	0.719852	4.34435	HC_cycler	LD
FBgn0284408	2:s_LNv	0.577636	21.8247	0.0037	9.66255e-09	1.99346e-07	16.5564	2.08235	7.95084	HC_cycler	LD
Hsp83	2:s_LNv	0.801897	11.5063	0.001	9.74229e-09	1.99965e-07	8.36792	2.83327	2.95345	HC_cycler	LD
CG8861	2:s_LNv	0.582096	6.05929	0.0239	1.08339e-08	2.21242e-07	10.5515	3.99251	2.64282	HC_cycler	LD
CG32521	2:s_LNv	0.888627	5.54215	0.0001	1.11026e-08	2.25584e-07	2.79051	0.383239	7.28139	HC_cycler	LD
cype	2:s_LNv	0.824343	20.5031	0.0008	1.24427e-08	2.51543e-07	2.046	0.751471	2.72266	HC_cycler	LD
pros	2:s_LNv	0.531493	21.392	0.0424	1.2958e-08	2.59353e-07	7.41322	2.53339	2.9262	HC_cycler	LD
7B2	2:s_LNv	0.703538	11.9908	0.0065	1.36042e-08	2.70939e-07	19.7523	10.2286	1.93108	HC_cycler	LD
Ac78C	2:s_LNv	0.929864	23.9304	0.0001	1.37154e-08	2.71807e-07	2.39372	0.625065	3.82955	HC_cycler	LD
CG8177	2:s_LNv	0.749326	14.2559	0.0033	1.40523e-08	2.7712e-07	3.6962	0.849987	4.34853	HC_cycler	LD
CG3645	2:s_LNv	0.739616	2.89493	0.0056	1.42817e-08	2.77561e-07	3.88118	1.38372	2.80489	HC_cycler	LD
DIP-delta	2:s_LNv	0.585611	20.4245	0.0021	1.42817e-08	2.77561e-07	1.5751	0.211389	7.4512	HC_cycler	LD
wry	2:s_LNv	0.65542	22.5677	0.0006	1.42817e-08	2.77561e-07	5.88298	1.26214	4.66111	HC_cycler	LD
Ag5r2	2:s_LNv	0.648317	19.1204	0.0078	1.57362e-08	3.0436e-07	5.93251	0.0199433	297.469	HC_cycler	LD
CG43921	2:s_LNv	0.90242	9.00393	0.0003	1.73341e-08	3.33662e-07	7.64212	3.20498	2.38445	HC_cycler	LD
rdgB	2:s_LNv	0.657471	9.17405	0.0028	1.87851e-08	3.59868e-07	8.13786	2.70621	3.00711	HC_cycler	LD
Gp93	2:s_LNv	0.919751	7.71083	0.0001	1.98707e-08	3.78862e-07	1.36928	0.234013	5.85129	HC_cycler	LD
CG13654	2:s_LNv	0.721044	6.62799	0.0076	2.15269e-08	4.08504e-07	0.944043	0.0975118	9.68132	HC_cycler	LD
Lmpt	2:s_LNv	0.720404	22.3133	0.0086	2.33168e-08	4.40392e-07	0.967421	0	2.1	HC_cycler	LD
porin	2:s_LNv	0.53071	3.37746	0.0367	2.46539e-08	4.61315e-07	9.65174	3.72944	2.58798	HC_cycler	LD
Sema-1a	2:s_LNv	0.769045	5.80858	0.0065	2.50497e-08	4.6655e-07	8.92865	4.27847	2.08688	HC_cycler	LD
CG11221	2:s_LNv	0.631927	4.00141	0.0057	2.71226e-08	5.00523e-07	3.64756	0.502863	7.25358	HC_cycler	LD
l(3)neo38	2:s_LNv	0.674624	14.5411	0.0074	2.95958e-08	5.43671e-07	5.90461	2.32554	2.53903	HC_cycler	LD
CG6123	2:s_LNv	0.744697	3.91144	0.0015	3.00683e-08	5.49839e-07	5.96463	1.42479	4.18632	HC_cycler	LD
CG32815	2:s_LNv	0.557993	6.91568	0.0366	3.20322e-08	5.80475e-07	1.93894	0.213355	9.08788	HC_cycler	LD
ftz-f1	2:s_LNv	0.713081	20.1256	0.0007	3.22852e-08	5.82437e-07	4.67545	1.77258	2.63765	HC_cycler	LD
Rim	2:s_LNv	0.681473	7.39302	0.0063	3.57722e-08	6.42462e-07	11.6057	5.04172	2.30193	HC_cycler	LD
Sidpn	2:s_LNv	0.515216	9.94688	0.0055	3.83954e-08	6.86509e-07	2.26202	0.239464	9.44615	HC_cycler	LD
FASN1	2:s_LNv	0.571098	4.02921	0.0179	3.9312e-08	6.96706e-07	7.89832	1.99268	3.96366	HC_cycler	LD
Drat	2:s_LNv	0.56818	12.8463	0.0317	4.35285e-08	7.68049e-07	4.88418	1.87691	2.60225	HC_cycler	LD
COX6B	2:s_LNv	0.729978	22.2043	0.0038	4.45637e-08	7.82881e-07	3.75236	1.506	2.4916	HC_cycler	LD
Pdk1	2:s_LNv	0.556329	10.6187	0.012	4.89424e-08	8.56067e-07	7.32347	2.62805	2.78665	HC_cycler	LD
CG34383	2:s_LNv	0.716069	20.866	0.0023	4.93241e-08	8.59008e-07	1.85459	0.523808	3.54059	HC_cycler	LD
dpr15	2:s_LNv	0.698842	20.1965	0.0014	5.16847e-08	8.92393e-07	1.38276	0.0688666	20.0789	HC_cycler	LD
shot	2:s_LNv	0.849932	6.39021	0.0002	5.16847e-08	8.92393e-07	6.60293	2.95484	2.23461	HC_cycler	LD
Rab3	2:s_LNv	0.658527	5.59686	0.0181	5.24957e-08	9.02521e-07	7.65954	3.72256	2.0576	HC_cycler	LD
ND-15	2:s_LNv	0.693388	20.0944	0.0035	6.17917e-08	1.05782e-06	4.68267	1.44501	3.24058	HC_cycler	LD
l(1)G0156	2:s_LNv	0.732692	20.4778	0.006	6.22701e-08	1.06149e-06	2.6959	0.923698	2.91859	HC_cycler	LD
CG42788	2:s_LNv	0.699332	9.64688	0.0049	7.15582e-08	1.20957e-06	1.35506	0.185838	7.29163	HC_cycler	LD
DIP-gamma	2:s_LNv	0.724925	7.35813	0.0036	7.90888e-08	1.32573e-06	1.4184	0.1749	8.10978	HC_cycler	LD
Bacc	2:s_LNv	0.840472	10.1813	0.0004	7.96964e-08	1.33037e-06	16.2222	8.60597	1.885	HC_cycler	LD
Gapdh2	2:s_LNv	0.527008	8.254	0.0266	8.60508e-08	1.42462e-06	7.04338	2.14028	3.29087	HC_cycler	LD
Tpi	2:s_LNv	0.659266	7.52957	0.0062	8.94118e-08	1.46818e-06	3.37215	0.803859	4.19495	HC_cycler	LD
SK	2:s_LNv	0.737167	14.3483	0.0059	9.43251e-08	1.54256e-06	20.7525	10.7661	1.92758	HC_cycler	LD
Pal2	2:s_LNv	0.746212	6.74693	0.0074	1.14112e-07	1.85859e-06	3.76831	1.27077	2.96536	HC_cycler	LD
ATPsynCF6	2:s_LNv	0.637182	20.7632	0.0075	1.15858e-07	1.87942e-06	5.84913	1.91832	3.04908	HC_cycler	LD
Lk6	2:s_LNv	0.671844	9.48671	0.0017	1.30785e-07	2.11304e-06	17.5083	8.24535	2.12342	HC_cycler	LD
ASPP	2:s_LNv	0.550741	6.12847	0.0332	1.32776e-07	2.11968e-06	1.09828	0.239152	4.5924	HC_cycler	LD
crc	2:s_LNv	0.666975	8.23201	0.0042	1.31773e-07	2.11968e-06	3.48191	0.954442	3.64811	HC_cycler	LD
mtd	2:s_LNv	0.755794	1.25987	0.0015	1.32776e-07	2.11968e-06	8.57946	3.88544	2.20811	HC_cycler	LD
Sec61alpha	2:s_LNv	0.725831	7.4822	0.006	1.83428e-07	2.90523e-06	1.20773	0.263001	4.59213	HC_cycler	LD
alphagamma-element:CR32865	2:s_LNv	0.652465	9.06442	0.0006	1.91836e-07	3.0265e-06	3.28996	0.452742	7.26675	HC_cycler	LD
unk	2:s_LNv	0.618687	7.81107	0.0088	2.03629e-07	3.2e-06	5.00011	1.7546	2.84972	HC_cycler	LD
CtsB1	2:s_LNv	0.829617	8.93572	0.0001	2.16122e-07	3.34407e-06	4.66849	1.52292	3.06548	HC_cycler	LD
VhaAC45	2:s_LNv	0.738096	10.9848	0.0042	2.14527e-07	3.34407e-06	5.66126	2.06684	2.73909	HC_cycler	LD
CG45057	2:s_LNv	0.600816	6.37785	0.0164	2.21001e-07	3.40647e-06	0.872044	0.107584	8.10573	HC_cycler	LD
Dp1	2:s_LNv	0.780139	7.60606	0.0007	2.22643e-07	3.41868e-06	2.34051	0.490315	4.77348	HC_cycler	LD
CG43117	2:s_LNv	0.655532	0.294079	0.0095	2.34521e-07	3.58737e-06	2.16055	0.452916	4.77031	HC_cycler	LD
mam	2:s_LNv	0.501676	5.73712	0.0485	2.46998e-07	3.76391e-06	4.70771	1.00842	4.66841	HC_cycler	LD
Act5C	2:s_LNv	0.701281	12.8205	0.0047	2.52549e-07	3.81956e-06	14.3721	7.21606	1.99168	HC_cycler	LD
CG44838	2:s_LNv	0.521115	2.50984	0.0394	2.62051e-07	3.93369e-06	1.44289	0.309661	4.65957	HC_cycler	LD
ND-75	2:s_LNv	0.712098	19.1861	0.007	2.86304e-07	4.28179e-06	1.7264	0.302813	5.70122	HC_cycler	LD
CG11050	2:s_LNv	0.650456	12.7532	0.013	3.05911e-07	4.55807e-06	1.56163	0.231255	6.75283	HC_cycler	LD
eIF-1A	2:s_LNv	0.720839	10.8058	0.0066	3.38999e-07	5.03244e-06	3.14638	1.20618	2.60855	HC_cycler	LD
FBgn0285937	2:s_LNv	0.700831	7.4025	0.0035	3.54214e-07	5.23898e-06	1.95855	0.433874	4.5141	HC_cycler	LD
Dop1R1	2:s_LNv	0.759435	16.0546	0.0021	3.7553e-07	5.51372e-06	3.25956	0.854951	3.81256	HC_cycler	LD
nolo	2:s_LNv	0.644718	15.5185	0.0104	3.86648e-07	5.65631e-06	4.46927	1.02341	4.36703	HC_cycler	LD
gol	2:s_LNv	0.781351	10.3943	0.0001	4.34381e-07	6.28602e-06	2.13755	0.456474	4.68275	HC_cycler	LD
noc	2:s_LNv	0.769565	14.0474	0.0003	4.34381e-07	6.28602e-06	3.17741	1.13877	2.79021	HC_cycler	LD
Sec61beta	2:s_LNv	0.783026	5.83285	0.0049	4.56997e-07	6.56607e-06	2.04096	0.439018	4.64893	HC_cycler	LD
spg	2:s_LNv	0.855337	10.4921	0.0008	4.60333e-07	6.59046e-06	1.07272	0.200125	5.36026	HC_cycler	LD
CG7337	2:s_LNv	0.67262	0.874751	0.0008	5.02087e-07	7.16275e-06	4.3676	0.935865	4.66692	HC_cycler	LD
CG3409	2:s_LNv	0.83136	6.58926	0.0004	5.47484e-07	7.75538e-06	2.45082	0.792035	3.09433	HC_cycler	LD
cwo	2:s_LNv	0.531105	13.9086	0.0292	5.47484e-07	7.75538e-06	9.24405	3.52792	2.62025	HC_cycler	LD
cathD	2:s_LNv	0.802106	10.837	0.0005	5.55425e-07	7.84027e-06	1.24125	0.318459	3.89768	HC_cycler	LD
ps	2:s_LNv	0.797285	14.2974	0.0004	5.84091e-07	8.21607e-06	26.7489	15.1408	1.76668	HC_cycler	LD
Rm62	2:s_LNv	0.55526	10.0235	0.0278	5.92544e-07	8.30593e-06	3.58463	1.42405	2.51721	HC_cycler	LD
flw	2:s_LNv	0.61799	20.6154	0.014	6.6455e-07	9.28294e-06	5.8199	1.41099	4.1247	HC_cycler	LD
Mpcp	2:s_LNv	0.711283	23.2145	0.0075	6.9866e-07	9.72563e-06	9.0295	4.29111	2.10423	HC_cycler	LD
CR45507	2:s_LNv	0.84596	1.91455	0.0001	7.55649e-07	1.04109e-05	1.89161	0.313327	6.03716	HC_cycler	LD
Pglym78	2:s_LNv	0.536066	4.40354	0.0274	7.71977e-07	1.05995e-05	5.37837	1.54892	3.47233	HC_cycler	LD
slgA	2:s_LNv	0.612367	0.639563	0.0091	8.17147e-07	1.11816e-05	3.55206	0.751904	4.72409	HC_cycler	LD
CG14431	2:s_LNv	0.570774	17.0325	0.0078	8.70987e-07	1.18779e-05	1.28135	0.213165	6.01108	HC_cycler	LD
Mondo	2:s_LNv	0.85293	10.4106	0.0001	8.89711e-07	1.20923e-05	1.54987	0.305093	5.07998	HC_cycler	LD
alt	2:s_LNv	0.679975	6.80323	0.0078	1.01032e-06	1.36394e-05	1.50903	0.490136	3.07879	HC_cycler	LD
sick	2:s_LNv	0.592748	9.64977	0.0195	1.05392e-06	1.41331e-05	4.61276	0.753467	6.12205	HC_cycler	LD
Pgk	2:s_LNv	0.753569	8.65708	0.0019	1.08399e-06	1.4488e-05	1.08365	0.241687	4.48368	HC_cycler	LD
CG14372	2:s_LNv	0.735882	6.352	0.0077	1.09161e-06	1.45415e-05	0.994197	0.261636	3.79993	HC_cycler	LD
CG15630	2:s_LNv	0.534282	9.16001	0.0189	1.12271e-06	1.49064e-05	9.69242	1.73601	5.58314	HC_cycler	LD
nvy	2:s_LNv	0.778966	8.2591	0.001	1.34667e-06	1.77048e-05	1.66473	0.108462	15.3485	HC_cycler	LD
nAChRbeta1	2:s_LNv	0.730715	21.3582	0.0003	1.35613e-06	1.7771e-05	3.65241	1.38324	2.64048	HC_cycler	LD
pHCl	2:s_LNv	0.600552	20.8771	0.0126	1.43382e-06	1.87281e-05	3.12674	0.888792	3.51797	HC_cycler	LD
CD98hc	2:s_LNv	0.831978	6.54505	0.0007	1.52631e-06	1.98076e-05	3.34908	1.40909	2.37676	HC_cycler	LD
CG32676	2:s_LNv	0.868171	1.39944	0.0007	1.63586e-06	2.10257e-05	1.21518	0.367884	3.30316	HC_cycler	LD
Ddc	2:s_LNv	0.627008	4.05904	0.0131	1.63586e-06	2.10257e-05	3.23983	0.822696	3.93807	HC_cycler	LD
CR44999	2:s_LNv	0.609267	18.7022	0.0147	1.65866e-06	2.12509e-05	13.5063	3.70965	3.64085	HC_cycler	LD
Ykt6	2:s_LNv	0.793385	6.89955	0.0023	1.74093e-06	2.22342e-05	1.30035	0.299132	4.34708	HC_cycler	LD
CG11883	2:s_LNv	0.755378	12.5016	0.0045	1.89111e-06	2.39998e-05	1.99043	0.353057	5.63772	HC_cycler	LD
Drep1	2:s_LNv	0.877588	9.90532	0.0001	1.91733e-06	2.4256e-05	1.18688	0.0818669	14.4977	HC_cycler	LD
CG5334	2:s_LNv	0.698309	20.0093	0.0034	2.26045e-06	2.82416e-05	4.44814	0.157236	28.2895	HC_cycler	LD
CG30497	2:s_LNv	0.887223	5.25569	0.0003	2.29157e-06	2.85418e-05	16.0349	7.93986	2.01954	HC_cycler	LD
twit	2:s_LNv	0.530415	4.73605	0.0229	2.38742e-06	2.96438e-05	1.83219	0.00820933	223.184	HC_cycler	LD
dally	2:s_LNv	0.707816	6.00664	0.0076	2.45345e-06	3.03699e-05	2.84914	0.774634	3.67805	HC_cycler	LD
tai	2:s_LNv	0.855379	3.39336	0.0001	2.68034e-06	3.27751e-05	5.70248	2.49296	2.28743	HC_cycler	LD
Crtc	2:s_LNv	0.688393	8.20558	0.0048	2.69867e-06	3.28992e-05	3.23367	1.14965	2.81275	HC_cycler	LD
RapGAP1	2:s_LNv	0.595308	21.3898	0.0132	2.81082e-06	3.40601e-05	1.40661	0.210703	6.67581	HC_cycler	LD
MYPT-75D	2:s_LNv	0.77054	16.6463	0.0011	2.94727e-06	3.54997e-05	0.865527	0.137904	6.27632	HC_cycler	LD
puc	2:s_LNv	0.879222	8.47365	0.0004	3.17483e-06	3.80129e-05	2.38758	0.700421	3.40878	HC_cycler	LD
unc-5	2:s_LNv	0.702745	6.85275	0.0091	3.19625e-06	3.81559e-05	1.06836	0.144849	7.37567	HC_cycler	LD
ND-39	2:s_LNv	0.618621	21.0139	0.0156	3.41906e-06	4.05749e-05	1.36283	0.282241	4.82862	HC_cycler	LD
fax	2:s_LNv	0.718317	19.1548	0.0046	3.5123e-06	4.14369e-05	19.6483	10.9911	1.78765	HC_cycler	LD
eys	2:s_LNv	0.748571	14.6204	0.0023	3.68146e-06	4.33056e-05	1.0151	0.195544	5.19113	HC_cycler	LD
ed	2:s_LNv	0.542985	6.46917	0.041	3.98965e-06	4.66581e-05	4.14856	1.15003	3.60734	HC_cycler	LD
jim	2:s_LNv	0.523715	17.3808	0.0415	4.43933e-06	5.16168e-05	12.9498	5.61453	2.30648	HC_cycler	LD
CG44153	2:s_LNv	0.708082	9.08012	0.0023	4.5288e-06	5.25053e-05	6.01448	1.68497	3.56948	HC_cycler	LD
gprs	2:s_LNv	0.552235	2.69137	0.0286	5.38115e-06	6.20297e-05	3.09602	0.738124	4.19445	HC_cycler	LD
GlyP	2:s_LNv	0.641419	9.14112	0.0096	5.45274e-06	6.26753e-05	2.04395	0.789614	2.58854	HC_cycler	LD
CG1090	2:s_LNv	0.541072	2.26021	0.0434	5.71068e-06	6.54532e-05	2.21103	0.581429	3.80276	HC_cycler	LD
Hsc70-4	2:s_LNv	0.663255	11.8985	0.0091	6.22073e-06	7.08952e-05	9.26352	4.31513	2.14675	HC_cycler	LD
Unc-76	2:s_LNv	0.59044	2.21673	0.019	6.68645e-06	7.59875e-05	2.86548	1.09158	2.62508	HC_cycler	LD
Neb-cGP	2:s_LNv	0.815072	19.8972	0.0005	6.73025e-06	7.62699e-05	1.36682	0.419889	3.2552	HC_cycler	LD
CG6154	2:s_LNv	0.638105	14.5712	0.0048	6.86389e-06	7.75658e-05	1.036	0.116339	8.905	HC_cycler	LD
Pli	2:s_LNv	0.692604	6.96202	0.0054	6.90881e-06	7.78548e-05	2.23717	0.58636	3.81535	HC_cycler	LD
Gbeta13F	2:s_LNv	0.718442	18.1078	0.007	7.27966e-06	8.15768e-05	23.701	15.7386	1.50591	HC_cycler	LD
smt3	2:s_LNv	0.71059	15.8916	0.0054	7.77011e-06	8.65905e-05	4.94703	2.39581	2.06487	HC_cycler	LD
cno	2:s_LNv	0.903289	9.86377	0.0001	7.87193e-06	8.72418e-05	1.55052	0.245261	6.32191	HC_cycler	LD
rgn	2:s_LNv	0.714313	19.8776	0.0035	7.87193e-06	8.72418e-05	0.982609	0.14567	6.74545	HC_cycler	LD
CG8405	2:s_LNv	0.800506	19.5709	0.0015	7.92348e-06	8.75719e-05	1.91806	0.666403	2.87823	HC_cycler	LD
CG44422	2:s_LNv	0.50162	9.64369	0.0229	8.29215e-06	9.13954e-05	8.72847	2.27167	3.84232	HC_cycler	LD
Gp210	2:s_LNv	0.58175	14.108	0.0249	8.34634e-06	9.17413e-05	1.38353	0.328668	4.20949	HC_cycler	LD
CG31814	2:s_LNv	0.678799	22.7535	0.0005	8.84772e-06	9.69874e-05	1.23404	0.130881	9.42872	HC_cycler	LD
Srpk79D	2:s_LNv	0.753399	11.8965	0.0025	9.43885e-06	0.000103186	3.28512	1.09692	2.99486	HC_cycler	LD
dysc	2:s_LNv	0.706008	7.66839	0.0058	9.68575e-06	0.000105313	12.2942	5.80432	2.11811	HC_cycler	LD
Bx	2:s_LNv	0.853871	21.4186	0.0005	9.93883e-06	0.000107773	7.79207	3.90133	1.99728	HC_cycler	LD
vvl	2:s_LNv	0.76959	18.1502	0.0033	1.01982e-05	0.000109699	2.77813	0.326847	8.49979	HC_cycler	LD
CG11267	2:s_LNv	0.79627	18.5546	0.0002	1.09457e-05	0.000116802	1.0094	0.151163	6.67756	HC_cycler	LD
Cp1	2:s_LNv	0.651777	8.74432	0.0114	1.09457e-05	0.000116802	4.53309	1.8995	2.38647	HC_cycler	LD
Cbp53E	2:s_LNv	0.539704	22.9975	0.0297	1.10159e-05	0.000116932	2.51663	0.591764	4.25276	HC_cycler	LD
CG12702	2:s_LNv	0.715365	19.5345	0.0028	1.15956e-05	0.00012276	1.43623	0.179509	8.00086	HC_cycler	LD
Xbp1	2:s_LNv	0.528725	5.98951	0.0259	1.20493e-05	0.000127229	1.9831	0.443639	4.47009	HC_cycler	LD
wdb	2:s_LNv	0.77732	8.16809	0.0011	1.27622e-05	0.000133357	13.0115	7.44756	1.74708	HC_cycler	LD
Gadd45	2:s_LNv	0.748075	17.4273	0.0046	1.35149e-05	0.000140492	2.95854	1.04542	2.83	HC_cycler	LD
CG32276	2:s_LNv	0.598304	6.40926	0.0282	1.45851e-05	0.000150451	1.27626	0.0707759	18.0324	HC_cycler	LD
CG34114	2:s_LNv	0.793791	20.5397	0.0007	1.46782e-05	0.000150638	1.84273	0.60563	3.04266	HC_cycler	LD
Npc2b	2:s_LNv	0.684169	18.3679	0.0072	1.53432e-05	0.000157062	1.31521	0.0529379	24.8443	HC_cycler	LD
Or45a	2:s_LNv	0.647506	8.8761	0.0176	1.55385e-05	0.000158256	1.46805	0.21981	6.67874	HC_cycler	LD
Jupiter	2:s_LNv	0.764097	15.8045	0.0042	1.60375e-05	0.000162927	2.68905	1.25533	2.14211	HC_cycler	LD
CG9328	2:s_LNv	0.655183	20.2951	0.0053	1.7627e-05	0.000177284	1.66332	0.16448	10.1126	HC_cycler	LD
NAA15-16	2:s_LNv	0.858557	19.4998	0.0006	1.79629e-05	0.000180212	1.14906	0.380124	3.02287	HC_cycler	LD
CG13560	2:s_LNv	0.595026	4.28652	0.0092	1.80758e-05	0.000180893	0.915788	0.0566417	16.1681	HC_cycler	LD
Glut4EF	2:s_LNv	0.530596	23.5361	0.0435	1.84199e-05	0.000183423	7.91629	4.65881	1.69921	HC_cycler	LD
SRPK	2:s_LNv	0.65709	9.08012	0.007	2.01082e-05	0.000199742	5.80315	2.27758	2.54795	HC_cycler	LD
CG42795	2:s_LNv	0.686446	5.07724	0.0054	2.26371e-05	0.000223208	24.8459	14.2089	1.74861	HC_cycler	LD
bel	2:s_LNv	0.728427	12.3692	0.0009	2.32069e-05	0.000227711	2.61127	1.10899	2.35463	HC_cycler	LD
CG31221	2:s_LNv	0.50191	19.3863	0.0453	2.36438e-05	0.000230871	11.5555	4.1792	2.765	HC_cycler	LD
osp	2:s_LNv	0.531573	20.4289	0.0356	2.48461e-05	0.000242024	1.55717	0.216432	7.19471	HC_cycler	LD
CG34417	2:s_LNv	0.503571	16.4167	0.0311	2.61068e-05	0.00025369	2.44378	0.157232	15.5425	HC_cycler	LD
CR45316	2:s_LNv	0.741693	22.1236	0.0001	2.6925e-05	0.00026101	4.26145	0.114925	37.0801	HC_cycler	LD
CG18265	2:s_LNv	0.654837	6.72105	0.0001	3.02657e-05	0.000290594	2.59269	0.788228	3.28927	HC_cycler	LD
sca	2:s_LNv	0.614939	17.9748	0.0215	3.25752e-05	0.000312024	1.66538	0.439721	3.78735	HC_cycler	LD
CG32506	2:s_LNv	0.694044	14.4346	0.0078	3.46274e-05	0.000328552	1.51044	0.645961	2.33829	HC_cycler	LD
syd	2:s_LNv	0.658267	8.781	0.0033	3.68026e-05	0.000348369	2.48759	0.651149	3.82031	HC_cycler	LD
RhoGAP100F	2:s_LNv	0.776445	5.42341	0.0002	3.70265e-05	0.000349666	7.30941	3.97377	1.83941	HC_cycler	LD
fwd	2:s_LNv	0.602571	9.64323	0.0034	3.74795e-05	0.00035229	2.49116	0.757216	3.28989	HC_cycler	LD
pk	2:s_LNv	0.77549	18.9213	0.0008	3.74795e-05	0.00035229	1.32329	0.0373533	35.4263	HC_cycler	LD
SERCA	2:s_LNv	0.750734	6.5823	0.0061	3.86359e-05	0.000362313	2.21699	0.849129	2.6109	HC_cycler	LD
b6	2:s_LNv	0.810728	18.766	0.0007	3.93449e-05	0.000368104	0.929722	0.0342641	27.134	HC_cycler	LD
CG10738	2:s_LNv	0.651167	19.9245	0.0141	3.9585e-05	0.00036949	1.17859	0.250021	4.71395	HC_cycler	LD
tna	2:s_LNv	0.566726	21.1977	0.0234	3.9825e-05	0.00037087	4.63208	1.8681	2.47957	HC_cycler	LD
CG32052	2:s_LNv	0.634769	4.44857	0.0105	4.12987e-05	0.000382822	2.58259	0.860949	2.9997	HC_cycler	LD
CG11300	2:s_LNv	0.730864	4.32945	0.0021	4.28244e-05	0.000395144	0.952637	0.180575	5.27559	HC_cycler	LD
CG32533	2:s_LNv	0.766702	20.8817	0.0001	4.3608e-05	0.000400537	2.08363	0.114623	18.1781	HC_cycler	LD
LpR1	2:s_LNv	0.599035	19.6161	0.0135	4.52148e-05	0.000414349	4.44145	1.57583	2.81848	HC_cycler	LD
unc-104	2:s_LNv	0.597674	5.17708	0.0265	4.83075e-05	0.000441684	21.4356	12.4867	1.71668	HC_cycler	LD
nAChRalpha1	2:s_LNv	0.831631	22.6571	0.001	4.91864e-05	0.000447685	3.25813	1.42371	2.28848	HC_cycler	LD
CG6024	2:s_LNv	0.619422	17.1374	0.0031	5.12938e-05	0.000464763	6.39331	1.72363	3.7092	HC_cycler	LD
Pde8	2:s_LNv	0.557812	14.0511	0.027	5.12938e-05	0.000464763	2.60902	0.804191	3.24428	HC_cycler	LD
CG33233	2:s_LNv	0.782824	7.56938	0.0004	5.16028e-05	0.000466512	1.43843	0.275667	5.218	HC_cycler	LD
Pkd2	2:s_LNv	0.653348	17.2458	0.0081	5.57714e-05	0.000499707	3.50449	0.107753	32.5234	HC_cycler	LD
Vha16-1	2:s_LNv	0.584172	5.98416	0.0175	5.57714e-05	0.000499707	14.7448	9.34175	1.57838	HC_cycler	LD
Edc3	2:s_LNv	0.746591	6.73749	0.0076	5.6106e-05	0.000501588	2.26229	0.885288	2.55542	HC_cycler	LD
skd	2:s_LNv	0.842644	4.11592	0.0011	6.02614e-05	0.000537543	7.15402	3.60611	1.98386	HC_cycler	LD
CG5549	2:s_LNv	0.591584	5.91388	0.0011	6.06196e-05	0.000539541	2.18874	0.61857	3.53838	HC_cycler	LD
Spase22-23	2:s_LNv	0.77746	7.06478	0.0016	6.50921e-05	0.000576796	1.25426	0.234361	5.35186	HC_cycler	LD
ATPsynF	2:s_LNv	0.609547	19.6743	0.0146	6.98775e-05	0.00061784	1.0995	0.340688	3.22728	HC_cycler	LD
casp	2:s_LNv	0.793374	11.648	0.001	7.32517e-05	0.000640634	0.812182	0.216871	3.745	HC_cycler	LD
CG32432	2:s_LNv	0.686012	0.663423	0.0024	7.58835e-05	0.000662211	0.941502	0.0879534	10.7046	HC_cycler	LD
Ktl	2:s_LNv	0.674173	4.86591	0.0074	7.72341e-05	0.000672539	2.97751	0.981914	3.03236	HC_cycler	LD
CG33129	2:s_LNv	0.547441	8.8788	0.0081	8.00017e-05	0.000693635	4.72921	1.06659	4.43396	HC_cycler	LD
ND-MLRQ	2:s_LNv	0.779989	19.5291	0.0021	8.38387e-05	0.000723783	1.78246	0.757409	2.35337	HC_cycler	LD
Act42A	2:s_LNv	0.75509	7.45134	0.0039	8.43291e-05	0.000726458	2.1115	0.679803	3.10604	HC_cycler	LD
sun	2:s_LNv	0.805347	23.0356	0.0008	8.58222e-05	0.000736168	0.974798	0.240408	4.05477	HC_cycler	LD
CG42674	2:s_LNv	0.55014	23.9132	0.0064	8.73376e-05	0.000745985	2.43719	0.567477	4.29478	HC_cycler	LD
RFeSP	2:s_LNv	0.563391	21.0201	0.0201	8.83629e-05	0.000751551	0.98995	0.252661	3.9181	HC_cycler	LD
Eaf	2:s_LNv	0.661353	5.03107	0.0007	8.99238e-05	0.000763214	2.6012	0.535598	4.85662	HC_cycler	LD
EF2	2:s_LNv	0.57932	12.3436	0.0059	9.64271e-05	0.000813262	7.43537	4.53281	1.64035	HC_cycler	LD
Nplp1	2:s_LNv	0.636227	22.6737	0.0027	9.9265e-05	0.000833702	4.42426	1.31867	3.35511	HC_cycler	LD
jv	2:s_LNv	0.646457	20.2863	0.0083	0.000108269	0.000899933	1.02807	0.125441	8.19569	HC_cycler	LD
Cam	2:s_LNv	0.544997	23.1306	0.0314	0.000114036	0.000942025	62.1382	29.9109	2.07744	HC_cycler	LD
AdSS	2:s_LNv	0.693348	7.0246	0.01	0.000114696	0.000943606	1.03926	0.151573	6.85649	HC_cycler	LD
CG13375	2:s_LNv	0.617441	0.366318	0.0171	0.000114696	0.000943606	1.77414	0.491053	3.61294	HC_cycler	LD
CG3662	2:s_LNv	0.695355	11.584	0.0066	0.000118042	0.000965211	8.44598	5.17605	1.63174	HC_cycler	LD
CG2258	2:s_LNv	0.682099	16.492	0.0119	0.000136998	0.00111342	1.96684	0.656327	2.99674	HC_cycler	LD
CG11739	2:s_LNv	0.534087	6.41669	0.0372	0.000139365	0.0011281	1.48624	0.17457	8.51368	HC_cycler	LD
brat	2:s_LNv	0.567851	7.47951	0.0323	0.000148367	0.00119376	12.0139	7.05172	1.70369	HC_cycler	LD
Gbs-76A	2:s_LNv	0.66907	7.49772	0.0062	0.000148367	0.00119376	0.964626	0.107569	8.96749	HC_cycler	LD
CR44043	2:s_LNv	0.573742	8.98342	0.0155	0.000149215	0.00119819	1.22012	0.120449	10.1298	HC_cycler	LD
hppy	2:s_LNv	0.740791	5.69665	0.0041	0.000152642	0.00122327	1.31932	0.273895	4.81687	HC_cycler	LD
SC35	2:s_LNv	0.899897	20.1329	0.0004	0.000167113	0.00133392	2.8792	0.358981	8.02046	HC_cycler	LD
CrebB	2:s_LNv	0.846021	4.40061	0.0004	0.000191279	0.00151778	1.57602	0.373148	4.22358	HC_cycler	LD
Ank2	2:s_LNv	0.737	21.2714	0.0033	0.00019452	0.00153141	32.2723	20.2073	1.59706	HC_cycler	LD
kek1	2:s_LNv	0.532739	18.9908	0.04	0.000193436	0.00153141	1.29072	0.389382	3.3148	HC_cycler	LD
mspo	2:s_LNv	0.685074	16.558	0.0038	0.00019452	0.00153141	1.02617	0.278077	3.69024	HC_cycler	LD
Mdh2	2:s_LNv	0.549722	19.3182	0.0365	0.000195615	0.00153703	1.99042	0.7837	2.53977	HC_cycler	LD
Tctp	2:s_LNv	0.736221	14.3227	0.0006	0.000196711	0.00154263	5.14504	2.9733	1.73041	HC_cycler	LD
sns	2:s_LNv	0.632428	0.169961	0.0054	0.000202295	0.00157719	1.00116	0.0907351	11.0339	HC_cycler	LD
Tsp42Ee	2:s_LNv	0.537194	7.39858	0.031	0.000213909	0.0016581	2.64753	1.00136	2.64392	HC_cycler	LD
side	2:s_LNv	0.613661	15.1743	0.0107	0.000233814	0.00180891	0.974841	0.186643	5.22303	HC_cycler	LD
Tudor-SN	2:s_LNv	0.601171	7.63849	0.0197	0.000237732	0.0018357	1.03032	0.124607	8.26852	HC_cycler	LD
ATPsynD	2:s_LNv	0.68885	21.4485	0.0004	0.000255462	0.0019613	1.74899	0.534514	3.27212	HC_cycler	LD
CG11191	2:s_LNv	0.645428	21.2523	0.0053	0.000259723	0.00198267	1.09715	0.180189	6.08886	HC_cycler	LD
gem	2:s_LNv	0.607353	6.70865	0.0241	0.000265514	0.00201921	3.20894	1.24366	2.58023	HC_cycler	LD
arm	2:s_LNv	0.762347	15.5524	0.0021	0.000266984	0.00202656	2.35004	1.15627	2.03243	HC_cycler	LD
uzip	2:s_LNv	0.524589	10.7983	0.0456	0.000282078	0.00213308	1.03096	0.198452	5.19501	HC_cycler	LD
Pi3K21B	2:s_LNv	0.714354	7.79667	0.0042	0.000288339	0.00217226	1.49543	0.45334	3.29869	HC_cycler	LD
Not1	2:s_LNv	0.639388	6.6684	0.0129	0.000293116	0.00220001	5.43192	2.67922	2.02742	HC_cycler	LD
UQCR-Q	2:s_LNv	0.630239	21.431	0.0145	0.000297976	0.00222818	1.42321	0.480099	2.96441	HC_cycler	LD
Trissin	2:s_LNv	0.827368	17.3439	0.0009	0.000299608	0.00223622	1.31409	0.36253	3.62477	HC_cycler	LD
Xrp1	2:s_LNv	0.706324	5.74693	0.0062	0.000301256	0.00224436	5.66755	2.1675	2.61479	HC_cycler	LD
CG45002	2:s_LNv	0.627774	20.0657	0.0034	0.000302904	0.00225246	4.20038	2.05426	2.04471	HC_cycler	LD
eag	2:s_LNv	0.622585	18.7987	0.0139	0.0003096	0.00229801	5.86225	1.60422	3.65426	HC_cycler	LD
arr	2:s_LNv	0.523624	6.34041	0.0336	0.000348999	0.00256209	0.926384	0.116568	7.94714	HC_cycler	LD
Pdi	2:s_LNv	0.508292	7.39832	0.0476	0.000364465	0.00267075	4.0957	1.8111	2.26145	HC_cycler	LD
CG14883	2:s_LNv	0.603505	12.4085	0.0109	0.000374463	0.00273903	3.72514	1.02632	3.62962	HC_cycler	LD
CG9821	2:s_LNv	0.594339	6.52806	0.0229	0.000376487	0.00274385	5.02896	3.10289	1.62073	HC_cycler	LD
crp	2:s_LNv	0.567804	11.2988	0.026	0.000393099	0.00285458	3.53955	1.70352	2.07779	HC_cycler	LD
ergic53	2:s_LNv	0.630973	6.68471	0.0169	0.000414836	0.00299083	2.26711	0.528346	4.29096	HC_cycler	LD
ovo	2:s_LNv	0.515301	18.5953	0.0114	0.000419317	0.00300697	1.58195	0.102101	15.4941	HC_cycler	LD
pcs	2:s_LNv	0.607752	2.4866	0.0074	0.000419317	0.00300697	2.21105	0.490362	4.50902	HC_cycler	LD
nkd	2:s_LNv	0.699974	9.16854	0.0076	0.000437703	0.00311109	1.20735	0.322097	3.74839	HC_cycler	LD
beat-Ib	2:s_LNv	0.619164	9.27526	0.0091	0.000451989	0.00319009	2.74504	0.776019	3.53734	HC_cycler	LD
Pur-alpha	2:s_LNv	0.568497	18.9463	0.0217	0.000459301	0.00323602	1.45137	0.424745	3.41704	HC_cycler	LD
CG6495	2:s_LNv	0.638852	12.4844	0.0068	0.000466713	0.00327676	0.911697	0.185863	4.90522	HC_cycler	LD
CR44922	2:s_LNv	0.715055	4.24717	0.0094	0.000466713	0.00327676	0.800748	0.11845	6.76019	HC_cycler	LD
PI4KIIIalpha	2:s_LNv	0.641566	20.8376	0.0114	0.00047172	0.00330615	2.11047	0.583597	3.61631	HC_cycler	LD
Pgm	2:s_LNv	0.599691	7.01291	0.0205	0.000481888	0.00336569	0.821614	0.0280994	29.2395	HC_cycler	LD
levy	2:s_LNv	0.545471	20.7674	0.0212	0.000492262	0.00343218	1.3189	0.356937	3.69505	HC_cycler	LD
Eaat2	2:s_LNv	0.59	12.0418	0.0245	0.000497527	0.00346289	1.17002	0.34358	3.40538	HC_cycler	LD
4EHP	2:s_LNv	0.529602	18.8635	0.0333	0.00052466	0.00363915	14.1591	6.68084	2.11936	HC_cycler	LD
CngB	2:s_LNv	0.510254	14.0702	0.0347	0.00053875	0.00371765	1.80379	0.680365	2.65122	HC_cycler	LD
Cerk	2:s_LNv	0.660311	7.93441	0.004	0.000595571	0.00405412	1.17894	0.218265	5.40143	HC_cycler	LD
CG17883	2:s_LNv	0.746679	18.2433	0.0008	0.000621148	0.00420686	1.02214	0.273605	3.73583	HC_cycler	LD
RpS25	2:s_LNv	0.657924	18.8314	0.0054	0.000641004	0.00432678	6.44443	3.5512	1.81472	HC_cycler	LD
CG45064	2:s_LNv	0.54935	18.7563	0.03	0.000644379	0.00434227	2.63677	0.055646	47.3847	HC_cycler	LD
CG11768	2:s_LNv	0.569541	8.62122	0.0327	0.000661456	0.00443507	3.19134	1.05339	3.02958	HC_cycler	LD
CG12484	2:s_LNv	0.507386	20.6997	0.0455	0.00067192	0.00449026	1.51892	0.368262	4.12457	HC_cycler	LD
Cka	2:s_LNv	0.582776	10.3752	0.014	0.000689682	0.00456347	3.2562	1.66651	1.9539	HC_cycler	LD
CG33229	2:s_LNv	0.670183	8.05106	0.0089	0.000745691	0.00487791	1.42315	0.387882	3.66903	HC_cycler	LD
aret	2:s_LNv	0.585355	18.6668	0.0145	0.000757382	0.00493034	16.5218	4.15427	3.97708	HC_cycler	LD
D1	2:s_LNv	0.644709	18.2778	0.0146	0.000757382	0.00493034	2.60687	1.16773	2.23243	HC_cycler	LD
CG15099	2:s_LNv	0.619587	1.68353	0.0014	0.00076133	0.00494005	0.944202	0.254447	3.7108	HC_cycler	LD
bnb	2:s_LNv	0.62679	9.03955	0.0089	0.000773252	0.00500933	2.32053	0.11782	19.6955	HC_cycler	LD
l(1)G0255	2:s_LNv	0.505226	22.7127	0.0263	0.00086183	0.00553856	0.890786	0.207781	4.28714	HC_cycler	LD
Sec23	2:s_LNv	0.507752	6.03351	0.0498	0.000884267	0.00565565	1.0849	0.351013	3.09076	HC_cycler	LD
CG33298	2:s_LNv	0.754559	10.3389	0.0043	0.000945237	0.00598849	0.947324	0.123787	7.65284	HC_cycler	LD
CG42748	2:s_LNv	0.587275	5.98896	0.0193	0.000954958	0.00603108	1.84469	0.891746	2.06863	HC_cycler	LD
TMS1	2:s_LNv	0.653347	8.60593	0.0046	0.000954958	0.00603108	2.25035	0.768632	2.92774	HC_cycler	LD
ttv	2:s_LNv	0.599074	20.5925	0.0167	0.000979661	0.0061389	1.84821	0.913984	2.02214	HC_cycler	LD
CG32206	2:s_LNv	0.848507	22.285	0.0004	0.00104677	0.0065188	1.21454	0.400343	3.03375	HC_cycler	LD
EndoA	2:s_LNv	0.583056	15.2683	0.0187	0.00104677	0.0065188	3.06147	1.68283	1.81924	HC_cycler	LD
CG15306	2:s_LNv	0.52481	21.5186	0.0433	0.00109017	0.00673696	1.9993	0.0529559	37.754	HC_cycler	LD
ATPsynO	2:s_LNv	0.673698	20.004	0.0044	0.00110687	0.00681918	1.10042	0.372137	2.95704	HC_cycler	LD
CG34347	2:s_LNv	0.790539	4.68463	0.0035	0.00110687	0.00681918	0.977189	0.112607	8.67783	HC_cycler	LD
mge	2:s_LNv	0.672847	19.1826	0.0016	0.00117022	0.00716556	2.30069	0.538485	4.27252	HC_cycler	LD
Df31	2:s_LNv	0.578718	14.2805	0.0177	0.00117612	0.0071908	9.13795	5.8976	1.54944	HC_cycler	LD
CG8910	2:s_LNv	0.518678	17.2747	0.0077	0.00118805	0.00725272	0.885445	0.0316236	27.9995	HC_cycler	LD
Pka-R2	2:s_LNv	0.798777	19.24	0.0021	0.00119408	0.00727843	3.21122	1.45339	2.20947	HC_cycler	LD
CG9281	2:s_LNv	0.807059	8.67345	0.0008	0.00124317	0.00749817	2.4988	1.04493	2.39135	HC_cycler	LD
His4r	2:s_LNv	0.60757	9.78565	0.0177	0.00125574	0.00756262	7.18559	3.73216	1.92532	HC_cycler	LD
DCP2	2:s_LNv	0.549988	6.36584	0.0421	0.00128766	0.00772019	2.94185	1.11241	2.64458	HC_cycler	LD
Galphas	2:s_LNv	0.55132	11.8956	0.0291	0.00130064	0.00777487	1.94913	0.975336	1.99842	HC_cycler	LD
ERp60	2:s_LNv	0.722498	8.4019	0.0058	0.00132698	0.00790883	0.925802	0.253962	3.64544	HC_cycler	LD
CG7630	2:s_LNv	0.587337	20.2305	0.0244	0.00134034	0.00795309	1.151	0.30821	3.73446	HC_cycler	LD
RpL7A	2:s_LNv	0.626736	16.8216	0.0111	0.00134708	0.00798131	4.13576	2.29991	1.79823	HC_cycler	LD
His3.3B	2:s_LNv	0.524879	23.4233	0.0409	0.00135382	0.00800946	44.001	29.1488	1.50953	HC_cycler	LD
Actn	2:s_LNv	0.622215	7.68325	0.0148	0.0013881	0.00814043	3.39148	1.37434	2.46771	HC_cycler	LD
UQCR-C2	2:s_LNv	0.60301	18.9446	0.0128	0.0013881	0.00814043	1.1841	0.515901	2.2952	HC_cycler	LD
COX4	2:s_LNv	0.663473	22.1716	0.0074	0.00151074	0.00874493	6.97434	2.2682	3.07484	HC_cycler	LD
CG8026	2:s_LNv	0.83579	13.8621	0.0013	0.00156416	0.00902811	1.53276	0.554217	2.76563	HC_cycler	LD
trio	2:s_LNv	0.870266	6.32987	0.002	0.00157973	0.00907894	1.63226	0.728305	2.24117	HC_cycler	LD
Karybeta3	2:s_LNv	0.570245	11.2077	0.0308	0.00158756	0.00909791	1.04388	0.310602	3.36081	HC_cycler	LD
CG3822	2:s_LNv	0.5251	12.5774	0.0238	0.00161132	0.00922096	1.78007	0.326092	5.45879	HC_cycler	LD
CG33143	2:s_LNv	0.562187	22.4416	0.0262	0.00165981	0.00944471	1.50095	0.545635	2.75083	HC_cycler	LD
Gtp-bp	2:s_LNv	0.607091	7.41628	0.004	0.00170966	0.00970092	1.17252	0.0440989	26.5884	HC_cycler	LD
CG12355	2:s_LNv	0.618236	14.4719	0.0075	0.00171808	0.00973499	0.93752	0.174398	5.37576	HC_cycler	LD
COX7C	2:s_LNv	0.855952	19.0299	0.0004	0.00174366	0.0098246	1.19805	0.548116	2.18577	HC_cycler	LD
Lar	2:s_LNv	0.648443	20.3469	0.011	0.00183146	0.0102905	3.81452	1.95219	1.95397	HC_cycler	LD
ATPsynG	2:s_LNv	0.867755	20.9863	0.001	0.00199023	0.0110743	1.25921	0.460632	2.73366	HC_cycler	LD
CG5953	2:s_LNv	0.567895	16.9691	0.0209	0.0021723	0.0119387	1.03302	0.0960069	10.7598	HC_cycler	LD
Plc21C	2:s_LNv	0.510182	4.49366	0.0494	0.00221481	0.0120898	2.23019	0.813879	2.74021	HC_cycler	LD
rin	2:s_LNv	0.654899	16.9723	0.0023	0.00224723	0.0122336	4.68766	2.86096	1.63849	HC_cycler	LD
Rac1	2:s_LNv	0.885858	17.3264	0.0003	0.00230218	0.0124151	2.45463	0.994365	2.46854	HC_cycler	LD
COX5A	2:s_LNv	0.718975	21.8639	0.0067	0.00241589	0.0129244	1.00877	0.391819	2.57459	HC_cycler	LD
unc80	2:s_LNv	0.517859	17.9196	0.049	0.00245104	0.0130776	2.07449	0.629547	3.29522	HC_cycler	LD
CR44029	2:s_LNv	0.612438	7.67673	0.0136	0.00246283	0.0131231	1.22131	0.328715	3.71541	HC_cycler	LD
CG34054	2:s_LNv	0.501086	18.912	0.0351	0.00251061	0.01336	0.922385	0.0476591	19.3538	HC_cycler	LD
CG17271	2:s_LNv	0.671029	5.84925	0.0131	0.00262132	0.0138575	0.909096	0.345549	2.63087	HC_cycler	LD
CG7781	2:s_LNv	0.593105	4.42469	0.0084	0.00268473	0.0141555	2.08971	0.964284	2.16711	HC_cycler	LD
CG1640	2:s_LNv	0.554042	23.4986	0.0239	0.00293907	0.0153557	1.20334	0.517077	2.32719	HC_cycler	LD
CG13887	2:s_LNv	0.688037	8.78486	0.0097	0.00309633	0.0161145	1.10745	0.335835	3.29762	HC_cycler	LD
jp	2:s_LNv	0.618897	23.4209	0.0124	0.00311104	0.0161702	1.70664	0.588586	2.89956	HC_cycler	LD
sfl	2:s_LNv	0.723097	18.8583	0.0035	0.0031406	0.0162817	3.84852	1.27902	3.00896	HC_cycler	LD
CG16791	2:s_LNv	0.743928	23.3652	0.0018	0.00318539	0.0164715	4.12443	2.38269	1.731	HC_cycler	LD
Gyc88E	2:s_LNv	0.592222	11.2133	0.0107	0.00323084	0.0166637	0.844254	0.135665	6.2231	HC_cycler	LD
ND-B18	2:s_LNv	0.544458	19.3951	0.0196	0.00324607	0.0167208	1.31069	0.345445	3.7942	HC_cycler	LD
Lamp1	2:s_LNv	0.523602	10.1532	0.021	0.00341858	0.0174751	3.73489	1.94109	1.92412	HC_cycler	LD
COX8	2:s_LNv	0.714934	20.0261	0.0064	0.00346703	0.0176779	1.07642	0.38131	2.82297	HC_cycler	LD
CaBP1	2:s_LNv	0.584496	8.95024	0.0123	0.00358271	0.0181756	1.16548	0.245558	4.74627	HC_cycler	LD
Shaw	2:s_LNv	0.529191	20.1801	0.0136	0.00358271	0.0181756	1.93253	0.735938	2.62595	HC_cycler	LD
ND-42	2:s_LNv	0.521515	18.1595	0.0295	0.00378931	0.0190793	0.979416	0.252916	3.8725	HC_cycler	LD
CG31323	2:s_LNv	0.625663	14.7639	0.0087	0.00393313	0.0197048	0.968841	0.172344	5.62157	HC_cycler	LD
dikar	2:s_LNv	0.564898	19.8223	0.0155	0.00433502	0.0214248	3.85166	1.83856	2.09493	HC_cycler	LD
GstD1	2:s_LNv	0.527939	7.49046	0.0228	0.00433502	0.0214248	1.1892	0.187381	6.34644	HC_cycler	LD
NAT1	2:s_LNv	0.667203	13.8226	0.0026	0.00451869	0.0221152	3.36848	1.65942	2.02991	HC_cycler	LD
Nlg3	2:s_LNv	0.563788	19.0435	0.0234	0.00473116	0.023015	1.84565	0.728951	2.53193	HC_cycler	LD
sea	2:s_LNv	0.64421	18.0109	0.0155	0.00479663	0.0232212	2.02718	0.90294	2.24509	HC_cycler	LD
onecut	2:s_LNv	0.597473	16.2303	0.0179	0.00486303	0.0234862	3.19565	1.71068	1.86806	HC_cycler	LD
Pif1B	2:s_LNv	0.574646	5.93535	0.0104	0.00509041	0.0244668	1.00753	0.220148	4.57661	HC_cycler	LD
CG17734	2:s_LNv	0.581511	5.12326	0.0218	0.00530335	0.0253089	1.98286	0.852562	2.32576	HC_cycler	LD
rl	2:s_LNv	0.513057	9.27978	0.0022	0.00540064	0.0257121	1.74535	0.578598	3.01652	HC_cycler	LD
CG15547	2:s_LNv	0.657714	10.4434	0.0086	0.00542527	0.0257989	2.09474	0.793142	2.64107	HC_cycler	LD
garz	2:s_LNv	0.686684	5.65695	0.0069	0.00615683	0.0288011	0.937484	0.332757	2.81732	HC_cycler	LD
CG6115	2:s_LNv	0.566883	18.0355	0.0291	0.00638198	0.0296133	1.29566	0.60894	2.12773	HC_cycler	LD
Syx7	2:s_LNv	0.525052	12.0421	0.0323	0.00643944	0.0298111	1.12177	0.375969	2.98367	HC_cycler	LD
CG8245	2:s_LNv	0.546379	16.9761	0.009	0.00649738	0.0300103	1.13788	0.440885	2.5809	HC_cycler	LD
COX7A	2:s_LNv	0.522341	19.4453	0.0439	0.0065558	0.0302107	2.03096	0.858618	2.36538	HC_cycler	LD
CG11138	2:s_LNv	0.646613	4.07455	0.0107	0.00685522	0.0314106	5.07619	3.06382	1.65681	HC_cycler	LD
Dscam2	2:s_LNv	0.521084	21.9944	0.0296	0.00691659	0.0316558	1.55935	0.553736	2.81605	HC_cycler	LD
CG9005	2:s_LNv	0.504471	13.0309	0.0497	0.00707219	0.0322213	2.33631	1.14361	2.04292	HC_cycler	LD
CG9391	2:s_LNv	0.539629	16.1167	0.0148	0.00759224	0.0342801	1.47384	0.483393	3.04895	HC_cycler	LD
norpA	2:s_LNv	0.516066	21.0718	0.0209	0.00829174	0.0371053	1.80116	0.825166	2.18279	HC_cycler	LD
E2f1	2:s_LNv	0.500201	6.91113	0.0494	0.0083283	0.0372275	4.01161	1.9561	2.05082	HC_cycler	LD
Hsp68	2:s_LNv	0.513773	8.16559	0.0404	0.00949386	0.0415602	2.92882	1.13876	2.57194	HC_cycler	LD
CG3556	2:s_LNv	0.55637	16.6122	0.0124	0.0100875	0.0436834	4.29227	2.52388	1.70067	HC_cycler	LD
Vap-33A	2:s_LNv	0.5629	15.0605	0.0321	0.0101311	0.0436841	9.11806	5.34348	1.70639	HC_cycler	LD
cyr	2:s_LNv	0.571373	17.4782	0.0122	0.0102189	0.0439687	0.954138	0.0426941	22.3483	HC_cycler	LD
GIIIspla2	2:s_LNv	0.525742	19.0923	0.0265	0.0110893	0.0472589	0.847906	0.0831616	10.1959	HC_cycler	LD
RpLP0	2:s_LNv	0.506041	20.1188	0.0355	0.0110893	0.0472589	3.28751	1.54032	2.13431	HC_cycler	LD
sr	2:s_LNv	0.568894	20.3869	0.0205	0.0111848	0.0475147	3.11496	0.585807	5.31738	HC_cycler	LD
Hsp67Bb	2:s_LNv	0.53007	9.48206	0.0354	0.0115248	0.0485488	3.64348	1.87637	1.94177	HC_cycler	LD
Mnn1	2:s_LNv	0.569888	7.31239	0.0247	0.0116236	0.0489141	1.91854	0.89271	2.14912	HC_cycler	LD
ATPsyngamma	2:s_LNv	0.736725	22.8522	0.0004	0.0117735	0.0493384	1.06446	0.375119	2.83766	HC_cycler	LD
tim	20:DN3	0.831962	16.3632	0.0004	2.75684e-13	1.10908e-09	29.3772	0.354721	82.8178	HC_cycler	LD
Pdp1	20:DN3	0.900561	17.9242	0.0006	1.43531e-11	2.88713e-08	152.875	45.0284	3.39508	HC_cycler	LD
CG15628	20:DN3	0.695449	13.9271	0.0003	1.42642e-10	1.91282e-07	19.8107	2.34443	8.45015	HC_cycler	LD
pgant2	20:DN3	0.924024	1.5581	0.0001	1.38053e-09	1.38847e-06	12.5765	1.42559	8.82199	HC_cycler	LD
vri	20:DN3	0.797856	13.2306	0.0016	8.63708e-07	0.000694939	8.58356	0.378662	22.6682	HC_cycler	LD
comm	20:DN3	0.859948	13.7173	0.0004	2.43389e-06	0.00163192	3.6182	0.0361196	100.173	HC_cycler	LD
rad	20:DN3	0.613583	6.54278	0.0105	3.21162e-06	0.00184577	39.4857	11.2267	3.51712	HC_cycler	LD
Clk	20:DN3	0.737699	3.79208	0.0031	3.79483e-06	0.00190833	4.36895	0.337562	12.9426	HC_cycler	LD
CG14082	20:DN3	0.595915	14.3971	0.0002	5.85971e-06	0.00261929	7.89133	0.117555	67.1286	HC_cycler	LD
CG4168	20:DN3	0.80027	15.2322	0.0005	6.87043e-06	0.00276397	4.63013	0.262794	17.6189	HC_cycler	LD
norpA	20:DN3	0.820968	3.21611	0.0008	1.58185e-05	0.00578526	13.7676	4.90058	2.80937	HC_cycler	LD
Hipk	20:DN3	0.741331	18.9509	0.0029	2.36794e-05	0.0079385	15.6679	5.68109	2.75791	HC_cycler	LD
CG42541	20:DN3	0.764476	6.69465	0.0029	2.8876e-05	0.00872669	21.901	9.21307	2.37717	HC_cycler	LD
FBgn0284248	20:DN3	0.602036	22.1005	0.0149	3.03688e-05	0.00872669	4.54533	0.732966	6.20128	HC_cycler	LD
CG42342	20:DN3	0.617147	9.65818	0.0205	4.06957e-05	0.0109146	2.63669	0.589723	4.47107	HC_cycler	LD
CG6024	20:DN3	0.907606	13.8403	0.0002	0.000119513	0.0300501	17.0802	5.67618	3.0091	HC_cycler	LD
Ac13E	20:DN3	0.593697	6.17372	0.0154	0.000130844	0.0309638	10.271	2.66092	3.85995	HC_cycler	LD
Ald	20:DN3	0.684311	6.40959	0.005	0.000143177	0.0320001	8.39197	2.77984	3.01887	HC_cycler	LD
Magi	20:DN3	0.652671	1.72205	0.0083	0.00016389	0.0347016	1.84929	0	2.1	HC_cycler	LD
CG4467	20:DN3	0.587964	7.00197	0.0001	0.000187043	0.0376237	9.92758	3.07304	3.23054	HC_cycler	LD
Pde8	20:DN3	0.639623	11.7867	0.0046	0.000222973	0.0407737	11.886	3.34664	3.55161	HC_cycler	LD
wake	20:DN3	0.592417	17.7481	0.0163	0.000213621	0.0407737	4.65013	0.557019	8.34825	HC_cycler	LD
Pka-R1	25:l_LNv	0.885602	6.6848	0.0009	8.82711e-08	0.000328536	13.6072	1.4473	9.40182	HC_cycler	LD
vib	25:l_LNv	0.651826	4.33007	0.0073	1.63329e-07	0.000328536	8.26123	1.36364	6.0582	HC_cycler	LD
CrebA	25:l_LNv	0.750439	6.18281	0.0007	3.39232e-06	0.00454911	10.639	0.876383	12.1397	HC_cycler	LD
Argk	25:l_LNv	0.867512	4.71676	0.0002	5.57007e-06	0.0056021	8.95637	1.52544	5.87132	HC_cycler	LD
tim	25:l_LNv	0.897033	15.7313	0.0004	7.09689e-06	0.00571016	25.0357	1.40998	17.756	HC_cycler	LD
Ac13E	25:l_LNv	0.702866	4.39576	0.0091	1.43628e-05	0.00963025	4.59255	0.706002	6.505	HC_cycler	LD
Nhe2	25:l_LNv	0.61452	3.5853	0.0032	2.25849e-05	0.0129798	4.33942	0.30044	14.4435	HC_cycler	LD
Dyrk2	25:l_LNv	0.758219	3.545	0.0006	6.61722e-05	0.0266211	8.94452	0.792134	11.2917	HC_cycler	LD
hts	25:l_LNv	0.616909	9.21542	0.0007	6.61722e-05	0.0266211	3.93869	0.427852	9.20574	HC_cycler	LD
Abl	25:l_LNv	0.608643	3.22746	0.0205	8.12928e-05	0.029731	3.75839	0.811769	4.62987	HC_cycler	LD
tim	29:LPN	0.792176	16.0372	0.0009	2.80291e-06	0.0112761	14.6147	0.861195	16.9702	HC_cycler	LD
amon	29:LPN	0.796237	2.94582	0.0025	2.07735e-05	0.0278573	13.1751	1.86923	7.04844	HC_cycler	LD
chinmo	29:LPN	0.687774	3.92331	0.0036	1.8315e-05	0.0278573	16.0573	0.655433	24.4988	HC_cycler	LD
CG15082	3:DN1a	0.884831	7.51149	0.0001	3.27473e-31	1.31742e-27	70.3017	3.12654	22.4855	HC_cycler	LD
tim	3:DN1a	0.735583	16.2008	0.0014	2.59756e-21	5.22499e-18	30.0313	2.51706	11.9311	HC_cycler	LD
CG15098	3:DN1a	0.935458	6.52362	0.0001	1.06396e-18	1.42676e-15	8.41938	0.492536	17.0939	HC_cycler	LD
CG17777	3:DN1a	0.95658	23.7504	0.0001	1.59181e-17	1.60097e-14	19.5807	2.62902	7.44789	HC_cycler	LD
bru-3	3:DN1a	0.883514	22.8758	0.0002	1.52422e-15	1.22639e-12	93.4316	37.7932	2.47218	HC_cycler	LD
Ten-m	3:DN1a	0.81323	0.982376	0.0002	3.29985e-15	2.21255e-12	13.8901	3.18463	4.36161	HC_cycler	LD
CNMa	3:DN1a	0.629452	16.2335	0.0087	4.00673e-13	2.30272e-10	17.0729	0.467492	36.5201	HC_cycler	LD
CG2082	3:DN1a	0.769145	23.3142	0.0027	5.04959e-11	2.53931e-08	7.49332	2.04402	3.66598	HC_cycler	LD
FBgn0284248	3:DN1a	0.707553	0.309385	0.004	7.73521e-11	3.38764e-08	5.01859	1.525	3.29088	HC_cycler	LD
jeb	3:DN1a	0.692705	4.95553	0.0057	8.42068e-11	3.38764e-08	23.174	2.4517	9.45222	HC_cycler	LD
Nplp1	3:DN1a	0.758026	7.1203	0.0026	9.32004e-11	3.40859e-08	18.4152	4.23996	4.34324	HC_cycler	LD
unc-13-4A	3:DN1a	0.776628	14.7355	0.0002	1.12165e-10	3.76032e-08	10.976	3.22561	3.40276	HC_cycler	LD
CG15628	3:DN1a	0.719338	12.5425	0.0021	2.61888e-10	7.52552e-08	7.55244	1.84936	4.0838	HC_cycler	LD
Corin	3:DN1a	0.885973	0.737079	0.0003	2.49245e-10	7.52552e-08	26.1665	11.2506	2.32579	HC_cycler	LD
Pdp1	3:DN1a	0.870519	17.2996	0.0003	6.82114e-10	1.82943e-07	143.037	66.5274	2.15005	HC_cycler	LD
cry	3:DN1a	0.810013	3.16927	0.0013	8.13286e-10	2.04491e-07	4.75699	1.35156	3.51963	HC_cycler	LD
Mmp2	3:DN1a	0.762572	5.6963	0.0067	1.0652e-09	2.52076e-07	9.94901	2.38934	4.16391	HC_cycler	LD
dpr9	3:DN1a	0.716576	23.5082	0.0026	2.32901e-09	5.20533e-07	10.2214	3.36741	3.03539	HC_cycler	LD
amon	3:DN1a	0.718549	6.21717	0.0078	2.59528e-09	5.49516e-07	6.91637	1.66036	4.16558	HC_cycler	LD
Ant2	3:DN1a	0.570713	1.55566	0.0335	4.04704e-09	8.14061e-07	17.8486	6.73658	2.64951	HC_cycler	LD
nAChRalpha5	3:DN1a	0.86204	1.72604	0.0002	5.15886e-09	9.88289e-07	23.718	10.2116	2.32265	HC_cycler	LD
NaCP60E	3:DN1a	0.833969	22.2473	0.0007	5.73434e-09	1.0486e-06	9.42907	3.50817	2.68775	HC_cycler	LD
CG15537	3:DN1a	0.806445	8.90075	0.0019	6.86756e-09	1.20123e-06	14.2348	4.9136	2.89703	HC_cycler	LD
Tbh	3:DN1a	0.623166	19.4646	0.0068	9.25543e-09	1.48938e-06	10.0941	0.777272	12.9866	HC_cycler	LD
Hipk	3:DN1a	0.651424	0.729844	0.0118	1.19012e-08	1.84147e-06	20.0574	7.39408	2.71263	HC_cycler	LD
mspo	3:DN1a	0.661772	13.3027	0.0117	1.69193e-08	2.52098e-06	4.21385	0.548819	7.67804	HC_cycler	LD
CG3625	3:DN1a	0.732257	10.1168	0.0049	3.84315e-08	5.52179e-06	2.41112	0.599188	4.02398	HC_cycler	LD
noc	3:DN1a	0.719252	21.4938	0.0041	4.00996e-08	5.56278e-06	5.29135	1.4056	3.76447	HC_cycler	LD
Hsp23	3:DN1a	0.626206	0.991095	0.0028	4.30476e-08	5.77269e-06	13.4833	4.06614	3.31599	HC_cycler	LD
CG43737	3:DN1a	0.56287	23.6436	0.0224	6.84238e-08	8.87964e-06	8.72702	3.24311	2.69094	HC_cycler	LD
CG32369	3:DN1a	0.512072	1.62519	0.0063	7.33637e-08	9.22319e-06	5.10865	0.816836	6.25419	HC_cycler	LD
CG11030	3:DN1a	0.668199	13.986	0.0107	7.64799e-08	9.32359e-06	4.9023	0.253533	19.3359	HC_cycler	LD
CG11319	3:DN1a	0.811757	14.9805	0.0002	8.31161e-08	9.83459e-06	3.94742	0.670714	5.8854	HC_cycler	LD
CG31808	3:DN1a	0.565704	0.483421	0.0102	1.17279e-07	1.34695e-05	3.49863	0.619385	5.64855	HC_cycler	LD
CR44320	3:DN1a	0.827566	3.74396	0.0008	1.20533e-07	1.34695e-05	9.49991	2.85441	3.32816	HC_cycler	LD
Dys	3:DN1a	0.71435	19.7859	0.0035	1.99043e-07	2.10723e-05	2.03707	0.0893709	22.7934	HC_cycler	LD
Pvf3	3:DN1a	0.685651	9.68873	0.0002	2.5327e-07	2.61258e-05	1.867	0.201604	9.26073	HC_cycler	LD
sprt	3:DN1a	0.530418	21.4761	0.0388	3.13224e-07	3.07342e-05	3.05415	0.204235	14.954	HC_cycler	LD
CG3662	3:DN1a	0.579231	17.6846	0.012	4.07585e-07	3.72662e-05	10.3182	3.83911	2.68765	HC_cycler	LD
Dscam4	3:DN1a	0.704152	20.6116	0.004	4.02311e-07	3.72662e-05	13.5147	3.6717	3.68077	HC_cycler	LD
vib	3:DN1a	0.653166	5.24201	0.0155	3.97037e-07	3.72662e-05	8.28296	3.00315	2.75809	HC_cycler	LD
Argk	3:DN1a	0.863791	2.90761	0.0004	4.40876e-07	3.94143e-05	3.59132	1.11973	3.20731	HC_cycler	LD
ITP	3:DN1a	0.91196	16.7007	0.0001	4.8307e-07	4.13488e-05	8.59718	1.64743	5.21855	HC_cycler	LD
nvy	3:DN1a	0.680861	11.0539	0.0096	4.76779e-07	4.13488e-05	1.76763	0.0914919	19.32	HC_cycler	LD
nrv3	3:DN1a	0.66802	0.21906	0.0129	5.15492e-07	4.32047e-05	34.9838	20.4274	1.7126	HC_cycler	LD
CG4168	3:DN1a	0.631088	2.59129	0.0191	5.71844e-07	4.69495e-05	5.40339	2.30897	2.34018	HC_cycler	LD
Cam	3:DN1a	0.613351	20.2924	0.0183	6.17955e-07	4.97206e-05	87.4015	47.0824	1.85635	HC_cycler	LD
CG33143	3:DN1a	0.523324	0.838606	0.0102	6.59149e-07	5.09953e-05	8.54317	0.621313	13.7502	HC_cycler	LD
Eip75B	3:DN1a	0.730584	6.69961	0.0014	7.68941e-07	5.83669e-05	13.6385	5.30196	2.57235	HC_cycler	LD
svr	3:DN1a	0.673499	8.91932	0.0005	8.40837e-07	6.26424e-05	11.3076	3.40162	3.32417	HC_cycler	LD
Rh7	3:DN1a	0.69259	15.8559	0.0059	8.7369e-07	6.39065e-05	5.25307	1.23756	4.24469	HC_cycler	LD
CG14082	3:DN1a	0.839713	13.4138	0.0009	1.07041e-06	7.68973e-05	1.65004	0.120915	13.6463	HC_cycler	LD
Vap-33A	3:DN1a	0.51953	13.9599	0.0016	1.16919e-06	8.25205e-05	14.1978	4.85663	2.92338	HC_cycler	LD
cv-2	3:DN1a	0.752401	6.76364	0.0009	1.65989e-06	0.000115134	1.39356	0.0238081	58.5328	HC_cycler	LD
Eip93F	3:DN1a	0.674817	3.91862	0.0027	1.70166e-06	0.00011603	23.8298	9.9654	2.39126	HC_cycler	LD
dpr11	3:DN1a	0.689385	15.6388	0.006	2.12584e-06	0.000142538	2.92075	0.347557	8.40368	HC_cycler	LD
CG32547	3:DN1a	0.69152	10.2731	0.0009	2.31698e-06	0.000152807	5.75107	1.27479	4.51139	HC_cycler	LD
CG43921	3:DN1a	0.856587	14.3423	0.0014	2.49371e-06	0.00015867	5.19721	2.15103	2.41615	HC_cycler	LD
rad	3:DN1a	0.723921	2.84663	0.0039	2.52421e-06	0.00015867	94.3288	55.6865	1.69393	HC_cycler	LD
Ald	3:DN1a	0.612924	3.57222	0.0109	2.61863e-06	0.000162073	7.80767	2.04217	3.82322	HC_cycler	LD
Rfx	3:DN1a	0.859871	9.82483	0.0002	2.71606e-06	0.000165556	4.86095	1.53363	3.16957	HC_cycler	LD
CG31324	3:DN1a	0.708417	13.1941	0.0058	2.85165e-06	0.000171226	10.1108	3.19979	3.15982	HC_cycler	LD
nmo	3:DN1a	0.538435	3.42048	0.0136	3.0305e-06	0.00017929	21.1153	7.96123	2.65227	HC_cycler	LD
Act5C	3:DN1a	0.60979	9.28759	0.0053	4.19626e-06	0.00024466	19.0322	5.69607	3.34128	HC_cycler	LD
FBgn0284245	3:DN1a	0.515813	16.4678	0.0314	4.90111e-06	0.000277707	12.9675	4.93374	2.62833	HC_cycler	LD
robo3	3:DN1a	0.805446	3.82567	0.0011	5.99451e-06	0.000330355	3.67216	1.05441	3.48266	HC_cycler	LD
Dap160	3:DN1a	0.757171	4.75378	0.0013	7.76033e-06	0.000421177	3.87736	0.992836	3.90534	HC_cycler	LD
CG13995	3:DN1a	0.727518	4.79052	0.0061	8.61834e-06	0.000449672	1.55234	0.360768	4.30287	HC_cycler	LD
CG34356	3:DN1a	0.672439	3.97346	0.0049	8.71847e-06	0.000449672	6.63497	2.22577	2.98097	HC_cycler	LD
Tob	3:DN1a	0.781688	21.7588	0.0001	8.51821e-06	0.000449672	14.5939	6.41116	2.27632	HC_cycler	LD
CG44247	3:DN1a	0.630084	5.67822	0.0211	9.67734e-06	0.000486649	11.5615	4.09812	2.82117	HC_cycler	LD
CG9674	3:DN1a	0.677897	4.51222	0.0052	1.00179e-05	0.000497558	4.59126	1.54386	2.97387	HC_cycler	LD
Clk	3:DN1a	0.692578	4.46075	0.0047	1.0613e-05	0.000520686	5.26367	1.10905	4.7461	HC_cycler	LD
CG43066	3:DN1a	0.648547	1.8243	0.0108	1.17683e-05	0.000570408	5.33317	2.16041	2.46859	HC_cycler	LD
rdx	3:DN1a	0.660299	12.1251	0.0051	1.24623e-05	0.000596855	10.6574	2.88198	3.69795	HC_cycler	LD
CG9850	3:DN1a	0.575217	4.4218	0.0041	1.27504e-05	0.000603469	2.28096	0.385057	5.9237	HC_cycler	LD
corto	3:DN1a	0.656113	5.0399	0.0101	1.69324e-05	0.000782977	23.9082	8.73969	2.73559	HC_cycler	LD
nrv1	3:DN1a	0.750604	1.08332	0.0001	1.73184e-05	0.000791727	2.15975	0.1501	14.3887	HC_cycler	LD
CG6123	3:DN1a	0.50485	23.6544	0.0223	1.81158e-05	0.000809778	6.99551	2.01095	3.47871	HC_cycler	LD
tutl	3:DN1a	0.804907	18.9356	0.0013	1.83217e-05	0.000809981	7.31546	2.65227	2.75818	HC_cycler	LD
slo	3:DN1a	0.688119	21.3582	0.0062	1.89483e-05	0.000828574	12.9823	6.42148	2.0217	HC_cycler	LD
olf413	3:DN1a	0.550894	23.8618	0.0184	1.91631e-05	0.00082896	8.00187	3.08013	2.5979	HC_cycler	LD
Hsc70-3	3:DN1a	0.798823	7.90619	0.0023	2.19144e-05	0.000937889	7.95398	3.48489	2.28242	HC_cycler	LD
kug	3:DN1a	0.6789	23.8258	0.0019	2.70535e-05	0.00114564	3.96594	0.333723	11.884	HC_cycler	LD
CG11221	3:DN1a	0.861476	5.15357	0.0005	2.7657e-05	0.001159	3.31605	0.936333	3.54153	HC_cycler	LD
CG5549	3:DN1a	0.880374	6.04572	0.0016	2.8588e-05	0.00118567	3.51541	1.04303	3.37038	HC_cycler	LD
fne	3:DN1a	0.564054	1.42979	0.0006	3.0872e-05	0.00124198	35.713	18.0523	1.97831	HC_cycler	LD
2mit	3:DN1a	0.740849	13.8869	0.0064	4.01038e-05	0.00155132	4.72159	1.67472	2.81932	HC_cycler	LD
ArfGAP1	3:DN1a	0.621197	16.7453	0.0056	4.23353e-05	0.00157699	1.77644	0.282717	6.28344	HC_cycler	LD
beat-VII	3:DN1a	0.746099	10.1547	0.0002	4.18778e-05	0.00157699	9.66062	3.64942	2.64717	HC_cycler	LD
Pka-R1	3:DN1a	0.698343	8.5868	0.0074	4.18778e-05	0.00157699	3.93964	1.58273	2.48914	HC_cycler	LD
Fife	3:DN1a	0.689047	2.77029	0.0074	4.66457e-05	0.00170596	6.90557	3.38587	2.03953	HC_cycler	LD
igl	3:DN1a	0.743721	7.82425	0.0036	4.86938e-05	0.00176482	7.25212	2.61934	2.76868	HC_cycler	LD
CG31637	3:DN1a	0.778492	1.24365	0.0022	5.08273e-05	0.0018257	1.06686	0.285133	3.74161	HC_cycler	LD
brat	3:DN1a	0.606498	5.34292	0.0208	5.30495e-05	0.00185581	22.0802	8.89338	2.48277	HC_cycler	LD
SIFaR	3:DN1a	0.60897	15.7714	0.003	5.30495e-05	0.00185581	0.887965	0.0232345	38.2176	HC_cycler	LD
Pdi	3:DN1a	0.729279	9.35629	0.0043	5.47794e-05	0.00188357	1.76403	0.420602	4.19405	HC_cycler	LD
Octbeta1R	3:DN1a	0.882629	10.9152	0.0001	5.71654e-05	0.00194895	1.7193	0.327877	5.24374	HC_cycler	LD
CR44779	3:DN1a	0.545344	0.234024	0.0111	5.965e-05	0.00201657	1.58536	0.0746732	21.2306	HC_cycler	LD
FASN1	3:DN1a	0.592497	13.3981	0.0126	7.68526e-05	0.00257648	4.10331	1.41338	2.90318	HC_cycler	LD
Npc2b	3:DN1a	0.58872	22.4619	0.0274	8.26934e-05	0.00274939	32.036	17.108	1.87258	HC_cycler	LD
RpS3A	3:DN1a	0.601759	19.0044	0.0118	8.62202e-05	0.00284315	7.34273	2.8217	2.60224	HC_cycler	LD
CG33144	3:DN1a	0.537293	4.20768	0.0251	9.27429e-05	0.00300891	2.09453	0.628475	3.33272	HC_cycler	LD
CG18812	3:DN1a	0.747184	3.40137	0.0017	9.46895e-05	0.00304749	4.25703	1.95155	2.18136	HC_cycler	LD
lilli	3:DN1a	0.687593	15.3939	0.0107	0.000100764	0.00319193	3.78987	1.2375	3.06251	HC_cycler	LD
CG2258	3:DN1a	0.567836	10.4901	0.0337	0.000105018	0.00327509	1.87577	0.608121	3.08454	HC_cycler	LD
CG13375	3:DN1a	0.544337	4.36316	0.0313	0.000109441	0.00338677	4.73252	1.18263	4.00168	HC_cycler	LD
CG13760	3:DN1a	0.500151	17.4794	0.0066	0.000123794	0.00377291	1.82662	0.163875	11.1464	HC_cycler	LD
CG12484	3:DN1a	0.640892	6.39257	0.004	0.000126353	0.00382196	3.47857	0.573752	6.06284	HC_cycler	LD
elav	3:DN1a	0.544836	6.36409	0.0313	0.00013028	0.0038538	14.5574	6.66486	2.1842	HC_cycler	LD
Nlp	3:DN1a	0.881586	12.619	0.0003	0.00013028	0.0038538	1.03279	0.156524	6.59827	HC_cycler	LD
CG8861	3:DN1a	0.562918	18.5469	0.0205	0.000142793	0.00416272	5.46613	0.949658	5.75589	HC_cycler	LD
Oamb	3:DN1a	0.518464	3.3871	0.0352	0.000166189	0.00477556	2.10616	0.261666	8.04904	HC_cycler	LD
Ca-alpha1T	3:DN1a	0.537266	18.0172	0.0332	0.000178321	0.00508783	5.1421	1.31195	3.91944	HC_cycler	LD
CG34362	3:DN1a	0.685657	9.06044	0.0037	0.000180111	0.00510272	7.00878	2.66866	2.62633	HC_cycler	LD
CCHa1	3:DN1a	0.601605	22.6695	0.0226	0.000195131	0.00545146	43.6495	21.4262	2.0372	HC_cycler	LD
CG34357	3:DN1a	0.534283	2.00298	0.0228	0.000195131	0.00545146	2.69392	0.797414	3.37832	HC_cycler	LD
CG44422	3:DN1a	0.771116	12.0097	0.0026	0.000199066	0.00552306	2.99908	1.28023	2.3426	HC_cycler	LD
CG42613	3:DN1a	0.76633	23.1535	0.0014	0.000207164	0.00559344	14.6911	8.58069	1.71212	HC_cycler	LD
CG30116	3:DN1a	0.612501	0.979488	0.0234	0.000224303	0.00588001	4.54241	2.12162	2.14101	HC_cycler	LD
chinmo	3:DN1a	0.593856	3.88079	0.0202	0.000226548	0.00588001	9.79917	4.62046	2.12082	HC_cycler	LD
Dh44	3:DN1a	0.830451	7.31506	0.0009	0.000235697	0.00603955	6.5575	2.97333	2.20544	HC_cycler	LD
wry	3:DN1a	0.573074	2.12444	0.0276	0.000238027	0.00606066	2.22847	0.740747	3.00842	HC_cycler	LD
chn	3:DN1a	0.593906	3.15774	0.0273	0.000252542	0.00638978	4.83136	2.29812	2.10231	HC_cycler	LD
wake	3:DN1a	0.792571	16.9201	0.0025	0.000292582	0.00717719	2.41638	0.636774	3.79473	HC_cycler	LD
Pka-C1	3:DN1a	0.524435	7.74217	0.0367	0.000298351	0.00723052	11.4938	4.53231	2.53597	HC_cycler	LD
CG4829	3:DN1a	0.616535	12.7593	0.001	0.000304227	0.00732878	1.21163	0.086492	14.0085	HC_cycler	LD
CG43324	3:DN1a	0.604844	21.0585	0.0239	0.000316308	0.00748533	3.34047	1.38186	2.41738	HC_cycler	LD
CG7702	3:DN1a	0.567776	0.765195	0.0295	0.00032884	0.00769141	2.13954	0.125277	17.0785	HC_cycler	LD
Ac13E	3:DN1a	0.774822	4.13661	0.0018	0.000345148	0.00793447	10.3585	4.66596	2.22001	HC_cycler	LD
CG6329	3:DN1a	0.641185	2.40608	0.0106	0.000345148	0.00793447	11.1881	5.70047	1.96266	HC_cycler	LD
Rbp6	3:DN1a	0.703523	10.1609	0.0072	0.000358754	0.00820037	39.1257	23.2179	1.68515	HC_cycler	LD
Nhe2	3:DN1a	0.502663	2.23383	0.0428	0.000365744	0.00831293	3.09923	0.490852	6.31399	HC_cycler	LD
S	3:DN1a	0.520914	8.97393	0.0205	0.000430586	0.00967737	2.5487	0.713829	3.57047	HC_cycler	LD
CG1607	3:DN1a	0.531415	3.80896	0.0324	0.000443075	0.00984801	1.07925	0.234099	4.61021	HC_cycler	LD
Karybeta3	3:DN1a	0.617476	15.3363	0.0096	0.000443075	0.00984801	1.3664	0.1048	13.0382	HC_cycler	LD
Octbeta3R	3:DN1a	0.639161	21.8337	0.0007	0.000447338	0.00988814	2.24287	0.330158	6.79333	HC_cycler	LD
pog	3:DN1a	0.556666	0.333788	0.0118	0.000577478	0.012292	3.42718	1.20985	2.83274	HC_cycler	LD
CG31475	3:DN1a	0.624959	1.91362	0.0195	0.000616644	0.0129206	2.63336	0.506715	5.19693	HC_cycler	LD
Gclc	3:DN1a	0.750776	20.5255	0.0037	0.000742655	0.0152434	1.88278	0.246842	7.62748	HC_cycler	LD
beat-IIIc	3:DN1a	0.532569	15.4442	0.0165	0.000770597	0.0157366	1.55983	0.081598	19.116	HC_cycler	LD
CG9837	3:DN1a	0.614072	23.6777	0.0035	0.000806879	0.0163119	4.92393	1.57976	3.11689	HC_cycler	LD
SK	3:DN1a	0.637814	16.0152	0.0155	0.000900682	0.0176753	16.4125	9.8275	1.67006	HC_cycler	LD
Mnt	3:DN1a	0.612306	13.8021	0.0157	0.000942742	0.0182339	7.43017	3.53711	2.10063	HC_cycler	LD
CG31140	3:DN1a	0.658929	5.33272	0.0085	0.000968793	0.0186481	10.9299	6.42919	1.70004	HC_cycler	LD
CG10384	3:DN1a	0.618908	18.9704	0.0129	0.00109972	0.0207708	5.93295	1.74756	3.39499	HC_cycler	LD
Xbp1	3:DN1a	0.609066	9.74305	0.0084	0.00111972	0.0209519	1.47888	0.382656	3.86477	HC_cycler	LD
Bacc	3:DN1a	0.549496	9.1822	0.0301	0.00114007	0.0212337	17.5562	10.5556	1.66321	HC_cycler	LD
CG6154	3:DN1a	0.579427	7.94475	0.012	0.00118179	0.0219094	3.76508	1.03368	3.64241	HC_cycler	LD
EcR	3:DN1a	0.544658	5.91813	0.0161	0.00132752	0.0241657	3.64585	1.08084	3.37317	HC_cycler	LD
CG7337	3:DN1a	0.617817	19.2805	0.0135	0.00164149	0.0292199	1.84612	0.536824	3.43897	HC_cycler	LD
Mid1	3:DN1a	0.616431	8.83343	0.0017	0.00167056	0.0296064	10.6137	5.49096	1.93293	HC_cycler	LD
Sdc	3:DN1a	0.520459	15.0986	0.0381	0.00168521	0.0297351	9.97532	4.31822	2.31005	HC_cycler	LD
CG45263	3:DN1a	0.534388	16.4144	0.0333	0.00177607	0.030798	20.7516	5.89304	3.52137	HC_cycler	LD
Drat	3:DN1a	0.633968	18.1286	0.0068	0.00177607	0.030798	3.31476	0.808094	4.10195	HC_cycler	LD
east	3:DN1a	0.668183	6.77785	0.0089	0.00200613	0.0343432	3.9852	1.11437	3.57618	HC_cycler	LD
mod(mdg4)	3:DN1a	0.724399	18.0337	0.0024	0.00209488	0.0355599	2.69187	0.737277	3.6511	HC_cycler	LD
RpL11	3:DN1a	0.683012	20.1428	0.0071	0.00216844	0.0365005	1.96694	0.842483	2.33469	HC_cycler	LD
Rbp1-like	3:DN1a	0.568127	21.5404	0.0321	0.00238322	0.0389744	9.08829	4.62114	1.96668	HC_cycler	LD
Tim10	3:DN1a	0.606705	19.368	0.0129	0.00253017	0.0405533	1.55533	0.165469	9.39951	HC_cycler	LD
jing	3:DN1a	0.821091	20.9845	0.001	0.00255174	0.0407367	0.947247	0.147038	6.44221	HC_cycler	LD
nAChRalpha1	3:DN1a	0.667317	5.39857	0.0047	0.00275462	0.0434582	11.8825	5.67199	2.09495	HC_cycler	LD
RpS23	3:DN1a	0.585669	17.0189	0.002	0.00292249	0.0452199	5.70469	2.3125	2.4669	HC_cycler	LD
CG2991	3:DN1a	0.752643	23.5708	0.0004	0.00294734	0.0454297	1.41879	0.406721	3.48836	HC_cycler	LD
CG16721	3:DN1a	0.651237	17.4111	0.0108	0.00299744	0.0458506	1.09657	0.158545	6.91646	HC_cycler	LD
CG3645	3:DN1a	0.740282	3.00895	0.0004	0.00299744	0.0458506	2.44793	0.798704	3.06488	HC_cycler	LD
Hsp68	3:DN1a	0.686813	7.39009	0.0039	0.00323271	0.0481673	2.56428	0.546385	4.69317	HC_cycler	LD
Oct-TyrR	3:DN1a	0.601216	0.372425	0.0149	0.00323271	0.0481673	1.38899	0.469468	2.95864	HC_cycler	LD
tim	4:DN1p	0.936496	13.784	0.0002	7.86142e-24	3.16265e-20	31.2555	2.83418	11.0281	HC_cycler	LD
amon	4:DN1p	0.840381	3.24254	0.0002	3.57522e-21	7.19156e-18	23.7696	2.059	11.5443	HC_cycler	LD
CG15628	4:DN1p	0.878349	12.5133	0.0001	1.4422e-17	1.934e-14	13.4465	1.48123	9.07794	HC_cycler	LD
vri	4:DN1p	0.911872	11.104	0.0001	1.08668e-16	1.09293e-13	12.8474	1.25842	10.2092	HC_cycler	LD
Argk	4:DN1p	0.891918	1.80873	0.0002	2.23656e-14	1.79954e-11	10.03	1.76153	5.6939	HC_cycler	LD
CG31324	4:DN1p	0.703328	12.7315	0.0015	4.00312e-14	2.68409e-11	8.36409	0.53819	15.5411	HC_cycler	LD
Pdp1	4:DN1p	0.916538	13.851	0.0002	7.76673e-14	4.46365e-11	169.142	66.7085	2.53554	HC_cycler	LD
Clk	4:DN1p	0.831865	2.68683	0.0008	2.10698e-13	1.05955e-10	8.80903	0.490719	17.9513	HC_cycler	LD
SIFaR	4:DN1p	0.747003	13.9764	0.0028	2.23297e-12	9.98138e-10	4.87644	0.240535	20.2733	HC_cycler	LD
cwo	4:DN1p	0.915556	12.1323	0.0001	1.28725e-11	5.17861e-09	7.5577	1.28298	5.89075	HC_cycler	LD
CNMa	4:DN1p	0.638832	15.6141	0.0103	5.72256e-11	2.0929e-08	14.7306	0.030641	480.747	HC_cycler	LD
CG32264	4:DN1p	0.816678	11.247	0.0012	1.01935e-10	3.41738e-08	27.2293	10.0192	2.71772	HC_cycler	LD
Calx	4:DN1p	0.875963	10.788	0.0001	1.58462e-10	4.90379e-08	6.03669	0.75702	7.97428	HC_cycler	LD
futsch	4:DN1p	0.781425	10.8283	0.0002	5.01252e-10	1.44038e-07	43.3529	15.0567	2.8793	HC_cycler	LD
Eip75B	4:DN1p	0.861494	7.9063	0.0005	7.64912e-10	2.05149e-07	11.9314	2.95988	4.03104	HC_cycler	LD
CG43658	4:DN1p	0.754865	12.4315	0.003	1.45363e-09	3.65497e-07	9.87488	2.32885	4.24024	HC_cycler	LD
scrt	4:DN1p	0.722184	2.93598	0.0043	1.69605e-09	4.01365e-07	30.4514	6.95279	4.37974	HC_cycler	LD
Mmp2	4:DN1p	0.808262	8.83374	0.0002	1.97811e-09	4.42107e-07	9.31174	0.707139	13.1682	HC_cycler	LD
CG5549	4:DN1p	0.796095	5.18399	0.001	3.28563e-09	6.95688e-07	5.03468	0.662157	7.60345	HC_cycler	LD
CG15236	4:DN1p	0.536942	14.6643	0.0115	3.51361e-09	7.06763e-07	4.55053	0.499866	9.1035	HC_cycler	LD
CG13054	4:DN1p	0.699388	8.49593	0.0022	4.98556e-09	9.42403e-07	13.3791	4.57747	2.92282	HC_cycler	LD
CG17777	4:DN1p	0.776639	17.8689	0.0003	5.15358e-09	9.42403e-07	6.21152	0.226862	27.3802	HC_cycler	LD
chrb	4:DN1p	0.714647	5.89613	0.0045	9.61423e-09	1.6382e-06	65.6575	24.2833	2.70381	HC_cycler	LD
emc	4:DN1p	0.925556	9.33431	0.0001	9.77299e-09	1.6382e-06	7.71851	2.08276	3.7059	HC_cycler	LD
CG45002	4:DN1p	0.869583	14.4308	0.0002	2.43467e-08	3.91787e-06	6.68265	1.95041	3.42628	HC_cycler	LD
CG14082	4:DN1p	0.754403	12.2152	0.0033	3.03452e-08	4.69533e-06	3.28766	0.539237	6.09688	HC_cycler	LD
Eip63F-1	4:DN1p	0.59508	0.50932	0.0034	3.38619e-08	5.04543e-06	5.42894	0.152846	35.5191	HC_cycler	LD
CG8216	4:DN1p	0.838904	12.8393	0.0001	7.54831e-08	1.08453e-05	2.97324	0.2896	10.2667	HC_cycler	LD
CG43902	4:DN1p	0.567196	0.923047	0.0302	7.89961e-08	1.09587e-05	6.93774	0.655376	10.5859	HC_cycler	LD
CG32369	4:DN1p	0.684364	23.4638	0.0018	1.00628e-07	1.34942e-05	6.33103	0.775382	8.16504	HC_cycler	LD
CG45263	4:DN1p	0.700704	17.272	0.0064	1.15217e-07	1.49521e-05	12.1136	2.67658	4.52578	HC_cycler	LD
fne	4:DN1p	0.733744	3.31054	0.0019	3.00441e-07	3.66265e-05	34.0767	16.5096	2.06406	HC_cycler	LD
IA-2	4:DN1p	0.557219	13.6301	0.0253	3.00441e-07	3.66265e-05	269.935	126.065	2.14124	HC_cycler	LD
CG42541	4:DN1p	0.713976	3.50713	0.0036	4.12578e-07	4.74229e-05	13.6773	3.50203	3.90554	HC_cycler	LD
jdp	4:DN1p	0.596793	14.9283	0.0101	4.75988e-07	5.31917e-05	8.6259	1.17759	7.32506	HC_cycler	LD
Sdc	4:DN1p	0.827649	11.9956	0.0006	5.41056e-07	5.88289e-05	14.3932	5.38897	2.67085	HC_cycler	LD
Fur1	4:DN1p	0.557489	13.9044	0.0008	5.97401e-07	6.32459e-05	3.79766	0.472245	8.04171	HC_cycler	LD
CG34380	4:DN1p	0.642359	13.8783	0.0133	6.32127e-07	6.52063e-05	5.69035	1.45484	3.91133	HC_cycler	LD
CG42540	4:DN1p	0.779631	14.2529	0.0043	8.25463e-07	8.30209e-05	6.92742	1.57045	4.4111	HC_cycler	LD
CG34384	4:DN1p	0.743982	5.4578	0.0026	8.48838e-07	8.32896e-05	9.8639	2.82091	3.49671	HC_cycler	LD
mamo	4:DN1p	0.636299	5.34898	0.0147	1.04552e-06	0.000100146	45.0132	24.2775	1.85411	HC_cycler	LD
Moe	4:DN1p	0.816599	13.4761	0.0009	1.10499e-06	0.00010338	8.93666	2.7501	3.24958	HC_cycler	LD
CG6154	4:DN1p	0.724429	4.82746	0.0136	1.18401e-06	0.000108256	4.44065	1.76976	2.50919	HC_cycler	LD
kek1	4:DN1p	0.878137	23.4504	0.0001	1.28588e-06	0.000114958	7.09577	1.72899	4.104	HC_cycler	LD
CG9850	4:DN1p	0.74942	4.65299	0.0005	1.47466e-06	0.000128968	2.72071	0.080762	33.688	HC_cycler	LD
Act5C	4:DN1p	0.591606	11.999	0.0041	2.21443e-06	0.000189545	18.8169	5.72398	3.28739	HC_cycler	LD
CG6024	4:DN1p	0.820369	10.9537	0.0003	2.40013e-06	0.000199696	5.55159	1.88532	2.94464	HC_cycler	LD
sm	4:DN1p	0.709514	1.88007	0.0017	2.43229e-06	0.000199696	48.0812	18.9415	2.5384	HC_cycler	LD
CG15537	4:DN1p	0.729402	9.48968	0.0032	2.53215e-06	0.000203737	2.91048	0.157885	18.4342	HC_cycler	LD
br	4:DN1p	0.619765	0.627053	0.0158	2.85489e-06	0.00022087	8.91454	1.38496	6.43667	HC_cycler	LD
CG34370	4:DN1p	0.586809	15.4107	0.0053	3.57618e-06	0.000271452	6.33859	1.16955	5.41966	HC_cycler	LD
comm	4:DN1p	0.560076	10.7304	0.0315	4.24189e-06	0.000316021	2.30594	0.596286	3.86717	HC_cycler	LD
AstC	4:DN1p	0.674811	9.92243	0.0001	4.4697e-06	0.0003211	45.3291	10.834	4.18397	HC_cycler	LD
CG43759	4:DN1p	0.787807	22.124	0.0004	4.4697e-06	0.0003211	7.41182	0.990979	7.47929	HC_cycler	LD
Pkc53E	4:DN1p	0.777908	17.846	0.0003	5.29427e-06	0.000373664	8.90868	3.16167	2.81772	HC_cycler	LD
Unc-76	4:DN1p	0.653257	1.81806	0.0117	5.72203e-06	0.000396892	3.02912	0.766582	3.95146	HC_cycler	LD
ATPsynCF6	4:DN1p	0.696211	18.4316	0.0076	7.03063e-06	0.000479394	4.73865	0.811872	5.8367	HC_cycler	LD
dpr11	4:DN1p	0.810648	17.0116	0.001	9.07189e-06	0.000605882	7.71945	1.68563	4.57957	HC_cycler	LD
sNPF-R	4:DN1p	0.828586	1.70196	0.0012	9.18687e-06	0.000605882	7.15822	2.19364	3.26317	HC_cycler	LD
Ptpmeg2	4:DN1p	0.636802	1.81826	0.0127	1.08259e-05	0.000691314	10.3154	3.24921	3.17476	HC_cycler	LD
KrT95D	4:DN1p	0.65032	21.6933	0.0016	1.30625e-05	0.000821099	3.38844	0.501432	6.75753	HC_cycler	LD
GlcAT-P	4:DN1p	0.684806	12.6913	0.0035	1.39029e-05	0.00086048	1.65225	0.242663	6.80883	HC_cycler	LD
bru-3	4:DN1p	0.73069	22.3274	0.0051	1.7158e-05	0.00100039	73.522	42.1947	1.74245	HC_cycler	LD
Eip93F	4:DN1p	0.724624	1.92678	0.0033	1.67402e-05	0.00100039	22.3041	8.74983	2.54909	HC_cycler	LD
kuz	4:DN1p	0.762662	0.762289	0.0043	1.7158e-05	0.00100039	5.0061	1.90416	2.62904	HC_cycler	LD
CG44247	4:DN1p	0.842959	7.67073	0.0005	1.89311e-05	0.001088	6.57938	2.31843	2.83786	HC_cycler	LD
scyl	4:DN1p	0.611059	6.31509	0.01	1.94009e-05	0.0010993	36.0768	13.1556	2.74231	HC_cycler	LD
Drep3	4:DN1p	0.550546	14.3906	0.0105	2.1394e-05	0.00117902	2.79897	0.625484	4.47489	HC_cycler	LD
FBgn0284248	4:DN1p	0.760119	23.9526	0.0039	2.35815e-05	0.001282	4.54301	1.60341	2.83334	HC_cycler	LD
Pka-R1	4:DN1p	0.625521	8.16698	0.0115	2.79319e-05	0.00145935	4.94938	1.77867	2.78263	HC_cycler	LD
EndoA	4:DN1p	0.827217	14.9552	0.0016	3.07507e-05	0.00156595	3.84098	1.63678	2.34666	HC_cycler	LD
CG14186	4:DN1p	0.658052	9.36138	0.0102	4.19038e-05	0.00210609	1.8079	0.0851562	21.2304	HC_cycler	LD
CG12991	4:DN1p	0.72045	4.71185	0.01	4.44528e-05	0.00215462	3.74823	0.614054	6.10408	HC_cycler	LD
jeb	4:DN1p	0.774769	8.36141	0.0024	4.39291e-05	0.00215462	12.3856	5.21391	2.3755	HC_cycler	LD
CG32547	4:DN1p	0.575276	10.0073	0.0278	4.65951e-05	0.00223157	6.44582	1.1387	5.66067	HC_cycler	LD
CG1090	4:DN1p	0.729459	0.33614	0.0051	5.23886e-05	0.00245069	3.6011	0.706453	5.09744	HC_cycler	LD
Mef2	4:DN1p	0.723497	10.6112	0.003	5.30008e-05	0.00245083	3.86078	1.22921	3.14087	HC_cycler	LD
Pde11	4:DN1p	0.700545	2.6194	0.0043	5.36267e-05	0.00245159	4.22768	1.33731	3.16134	HC_cycler	LD
CG42342	4:DN1p	0.506072	18.157	0.044	6.45825e-05	0.00291927	1.4817	0.192188	7.70965	HC_cycler	LD
CG11319	4:DN1p	0.658393	13.3028	0.0044	6.68562e-05	0.00298847	2.39494	0.456346	5.24809	HC_cycler	LD
CG43078	4:DN1p	0.651454	10.7448	0.021	6.84169e-05	0.00302463	1.12161	0.174878	6.41369	HC_cycler	LD
hig	4:DN1p	0.606709	16.9244	0.0213	7.00122e-05	0.00306151	3.13435	0.89008	3.52142	HC_cycler	LD
Hsc70-4	4:DN1p	0.555974	10.5418	0.0232	7.2476e-05	0.00313517	7.09467	1.97694	3.58871	HC_cycler	LD
Sh	4:DN1p	0.548023	4.56482	0.03	8.60484e-05	0.00368269	40.5752	21.0924	1.92369	HC_cycler	LD
Ald	4:DN1p	0.903284	4.07412	0.0005	0.000106733	0.00440985	6.23274	3.26204	1.91069	HC_cycler	LD
CG13203	4:DN1p	0.531343	20.9354	0.0377	0.000112904	0.00440985	2.71906	0.324956	8.36747	HC_cycler	LD
CG13560	4:DN1p	0.782003	4.85156	0.001	0.000112904	0.00440985	1.477	0.0656252	22.5065	HC_cycler	LD
CG2993	4:DN1p	0.625414	14.7171	0.008	0.000109165	0.00440985	2.18165	0.673032	3.24153	HC_cycler	LD
CG3822	4:DN1p	0.717999	12.3504	0.0068	0.000111649	0.00440985	1.06049	0.188932	5.61308	HC_cycler	LD
cno	4:DN1p	0.693301	9.69579	0.0088	0.000112904	0.00440985	1.3402	0.0968929	13.8317	HC_cycler	LD
Dscam4	4:DN1p	0.663598	13.8336	0.014	0.000104352	0.00440985	7.51802	2.82902	2.65747	HC_cycler	LD
Rim	4:DN1p	0.665329	10.1021	0.0008	0.000112904	0.00440985	12.6296	5.57085	2.26708	HC_cycler	LD
Pka-R2	4:DN1p	0.831714	11.2595	0.0005	0.000124896	0.0048313	3.77319	1.07139	3.52178	HC_cycler	LD
pros	4:DN1p	0.720689	18.3931	0.0023	0.000126292	0.00483878	9.02273	3.65933	2.46568	HC_cycler	LD
Tdc2	4:DN1p	0.554508	9.45967	0.0185	0.000133544	0.00502101	1.18302	0.129276	9.15113	HC_cycler	LD
14-3-3zeta	4:DN1p	0.623182	12.2539	0.0138	0.00014596	0.00543702	45.5366	26.8002	1.69911	HC_cycler	LD
CG3625	4:DN1p	0.682363	10.1815	0.0111	0.000174143	0.0061998	1.70798	0.362437	4.71249	HC_cycler	LD
sca	4:DN1p	0.692385	18.6031	0.008	0.000205163	0.00711527	2.33014	0.741145	3.14397	HC_cycler	LD
Bacc	4:DN1p	0.621999	9.37211	0.0048	0.000214281	0.00736796	15.3649	6.27592	2.44823	HC_cycler	LD
CG42747	4:DN1p	0.505028	21.6621	0.0267	0.000216631	0.00738566	3.97099	0.503355	7.88904	HC_cycler	LD
CG15465	4:DN1p	0.609717	21.9428	0.0266	0.00022378	0.00750223	18.0747	9.76241	1.85146	HC_cycler	LD
pgant2	4:DN1p	0.540181	23.4144	0.0122	0.000257488	0.00842175	3.60473	0.268085	13.4462	HC_cycler	LD
vvl	4:DN1p	0.501792	20.4223	0.0364	0.000257488	0.00842175	3.4	0.398285	8.5366	HC_cycler	LD
Cow	4:DN1p	0.598535	0.883669	0.0276	0.000268784	0.00872031	3.41863	1.03449	3.30465	HC_cycler	LD
gw	4:DN1p	0.76359	14.1058	0.0057	0.000318814	0.0100202	7.26304	4.1358	1.75614	HC_cycler	LD
HmgZ	4:DN1p	0.832268	13.0619	0.0007	0.000318814	0.0100202	5.20347	2.24546	2.31732	HC_cycler	LD
beat-IV	4:DN1p	0.685325	19.1247	0.005	0.000322199	0.0100481	1.28422	0.224661	5.71626	HC_cycler	LD
Hsc70-3	4:DN1p	0.576652	9.34555	0.0184	0.000332628	0.0102935	6.1065	2.09472	2.91519	HC_cycler	LD
Pu	4:DN1p	0.531211	10.9987	0.0075	0.000339744	0.0104335	1.4201	0.0822487	17.2659	HC_cycler	LD
CG34353	4:DN1p	0.738144	14.2325	0.0031	0.000389597	0.0117846	4.92279	1.48133	3.32323	HC_cycler	LD
CG33090	4:DN1p	0.526226	7.38504	0.0142	0.000393727	0.0118206	2.12374	0.304658	6.97091	HC_cycler	LD
if	4:DN1p	0.751737	3.35596	0.0042	0.000428099	0.01248	0.993933	0.0806527	12.3236	HC_cycler	LD
CG6959	4:DN1p	0.502695	15.0908	0.0339	0.000437124	0.0126514	1.70423	0.155935	10.9291	HC_cycler	LD
4EHP	4:DN1p	0.685468	0.448571	0.0084	0.000532223	0.0149215	19.1102	10.3627	1.84413	HC_cycler	LD
CG4768	4:DN1p	0.506459	9.79079	0.0463	0.000532223	0.0149215	1.40557	0.248747	5.65062	HC_cycler	LD
CR45316	4:DN1p	0.618779	23.2823	0.0061	0.000543296	0.0149215	3.30222	0.125906	26.2277	HC_cycler	LD
pigs	4:DN1p	0.569184	22.89	0.0297	0.000548941	0.0149215	5.33151	1.31743	4.0469	HC_cycler	LD
Pxn	4:DN1p	0.63638	13.6131	0.0071	0.000577828	0.0156014	1.15267	0.07234	15.934	HC_cycler	LD
ND-23	4:DN1p	0.771601	18.5797	0.0002	0.000608199	0.0163119	3.71895	0.888862	4.18394	HC_cycler	LD
FBgn0285926	4:DN1p	0.758365	5.84649	0.0038	0.000680265	0.0177708	24.9814	14.4937	1.7236	HC_cycler	LD
RpL10	4:DN1p	0.74868	18.7287	0.0023	0.000687236	0.0178371	5.44797	2.19788	2.47874	HC_cycler	LD
CG4168	4:DN1p	0.718219	12.8073	0.008	0.000701311	0.0180857	1.9295	0.523421	3.68632	HC_cycler	LD
Mtor	4:DN1p	0.722825	20.2754	0.0079	0.000730276	0.0187127	2.22039	0.457159	4.85694	HC_cycler	LD
chinmo	4:DN1p	0.680142	3.61188	0.0069	0.000745175	0.0188543	9.00396	2.72744	3.30125	HC_cycler	LD
puc	4:DN1p	0.618247	9.92203	0.0139	0.000799562	0.0199791	1.53448	0.117441	13.066	HC_cycler	LD
sfl	4:DN1p	0.725811	22.3512	0.0028	0.000815782	0.0202586	3.64588	0.316761	11.5099	HC_cycler	LD
CG9705	4:DN1p	0.671848	16.1744	0.0065	0.000849153	0.0209579	1.01496	0.254883	3.98207	HC_cycler	LD
mspo	4:DN1p	0.707605	21.2113	0.0042	0.000901615	0.0217197	2.00862	0.710313	2.8278	HC_cycler	LD
A2bp1	4:DN1p	0.720808	12.5377	0.0064	0.00094768	0.0225593	6.3606	2.81091	2.26283	HC_cycler	LD
mtt	4:DN1p	0.548391	20.5806	0.0012	0.00094768	0.0225593	2.01721	0.0932611	21.6297	HC_cycler	LD
Glut4EF	4:DN1p	0.532681	0.756958	0.0314	0.000976295	0.0229686	17.1437	6.85781	2.49988	HC_cycler	LD
Mkp3	4:DN1p	0.550933	6.83168	0.0254	0.00099585	0.0231578	3.66038	0.90618	4.03935	HC_cycler	LD
sli	4:DN1p	0.605486	10.8215	0.027	0.00105674	0.0244325	1.51824	0.418863	3.62467	HC_cycler	LD
CG11221	4:DN1p	0.538402	2.36345	0.0332	0.00108852	0.0250235	1.44466	0.314188	4.59808	HC_cycler	LD
twz	4:DN1p	0.609257	11.3724	0.0211	0.00113222	0.0258802	1.39966	0.024734	56.5886	HC_cycler	LD
Lim1	4:DN1p	0.709061	10.7874	0.0052	0.00121261	0.0275612	11.1467	6.52632	1.70796	HC_cycler	LD
w	4:DN1p	0.582666	3.03847	0.0215	0.00126095	0.0283396	2.78819	0.771139	3.61568	HC_cycler	LD
Trissin	4:DN1p	0.729822	17.8041	0.0019	0.00129843	0.0290199	1.86095	0.523267	3.5564	HC_cycler	LD
CG14883	4:DN1p	0.567164	13.4871	0.0203	0.00148722	0.0326943	4.22287	0.891598	4.73629	HC_cycler	LD
SK	4:DN1p	0.658634	14.3638	0.011	0.00165313	0.0357172	15.2798	8.99115	1.69942	HC_cycler	LD
Idh	4:DN1p	0.636175	19.1508	0.0127	0.0016851	0.0358685	1.68395	0.187798	8.96683	HC_cycler	LD
CG7324	4:DN1p	0.811152	11.0945	0.001	0.00175078	0.0368764	0.92215	0.179464	5.13834	HC_cycler	LD
CG18812	4:DN1p	0.591078	5.96671	0.0032	0.00176765	0.0370377	6.7666	2.24277	3.01707	HC_cycler	LD
CG42724	4:DN1p	0.544153	16.5044	0.0232	0.00181885	0.0377176	2.13125	0.767646	2.77634	HC_cycler	LD
5-HT2B	4:DN1p	0.624267	13.085	0.0055	0.00183632	0.0378847	3.7662	1.06498	3.53642	HC_cycler	LD
Df31	4:DN1p	0.581642	10.9473	0.0231	0.00192558	0.0391036	7.57049	4.42186	1.71206	HC_cycler	LD
beat-VI	4:DN1p	0.552162	18.6686	0.0308	0.00205754	0.040576	1.77377	0.254605	6.96677	HC_cycler	LD
X11Lbeta	4:DN1p	0.510191	22.0753	0.0412	0.00205754	0.040576	9.02183	2.16592	4.16536	HC_cycler	LD
bol	4:DN1p	0.533229	23.3019	0.037	0.00219771	0.0423032	17.5318	4.41574	3.9703	HC_cycler	LD
CG14219	4:DN1p	0.51934	0.273803	0.0304	0.00232495	0.0441192	1.5267	0.0812929	18.7802	HC_cycler	LD
RpL14	4:DN1p	0.558989	21.2436	0.0197	0.00236886	0.0447414	5.07341	2.2017	2.30431	HC_cycler	LD
CG13229	4:DN1p	0.555712	18.6109	0.0282	0.00248214	0.0462298	1.68169	0.213807	7.86545	HC_cycler	LD
grp	4:DN1p	0.593267	14.0009	0.02	0.00255234	0.0473182	0.965692	0.249199	3.87519	HC_cycler	LD
CG11300	4:DN1p	0.668684	3.6224	0.0111	0.00269851	0.0480359	1.2272	0.145722	8.42153	HC_cycler	LD
CG31345	4:DN1p	0.719417	10.7069	0.0004	0.00269851	0.0480359	1.69127	0.289467	5.84269	HC_cycler	LD
CG6767	4:DN1p	0.530785	10.5864	0.0403	0.00267373	0.0480359	4.3255	1.67211	2.58685	HC_cycler	LD
heph	4:DN1p	0.736045	4.31365	0.003	0.00264894	0.0480359	27.6331	11.5307	2.39648	HC_cycler	LD
tim	5:LNd_Trissin	0.856136	16.546	0.0001	1.70618e-24	6.86395e-21	28.8116	0.386332	74.5775	HC_cycler	LD
CG15628	5:LNd_Trissin	0.831256	15.2357	0.0001	1.7826e-22	3.5857e-19	40.6119	4.72931	8.58728	HC_cycler	LD
Argk	5:LNd_Trissin	0.973603	5.68234	0.0001	1.5607e-18	2.0929e-15	13.8214	1.02231	13.5198	HC_cycler	LD
Pdp1	5:LNd_Trissin	0.878228	17.9945	0.0001	5.53927e-16	5.57112e-13	162.394	24.7109	6.57175	HC_cycler	LD
Cbp53E	5:LNd_Trissin	0.683128	18.7816	0.0002	1.2172e-15	9.79358e-13	8.81576	0.247611	35.6032	HC_cycler	LD
CG31324	5:LNd_Trissin	0.747428	15.3261	0.0002	3.27836e-15	2.19814e-12	6.08597	0.0608828	99.962	HC_cycler	LD
A2bp1	5:LNd_Trissin	0.762715	14.6027	0.0001	1.22516e-13	7.04119e-11	11.2381	2.79094	4.02664	HC_cycler	LD
CG17777	5:LNd_Trissin	0.761615	1.98567	0.0001	2.53649e-13	1.27554e-10	23.1617	2.58516	8.95946	HC_cycler	LD
CG17839	5:LNd_Trissin	0.708333	1.06617	0.0053	6.70368e-13	2.99655e-10	9.81099	0.666112	14.7288	HC_cycler	LD
Pdi	5:LNd_Trissin	0.855965	7.2688	0.0003	8.11936e-13	3.26642e-10	13.3018	1.56118	8.52037	HC_cycler	LD
Pka-R2	5:LNd_Trissin	0.748604	17.3225	0.0004	1.57704e-12	5.76768e-10	19.1029	1.20126	15.9024	HC_cycler	LD
chn	5:LNd_Trissin	0.875163	4.26252	0.0005	1.73142e-12	5.8046e-10	9.6566	1.01916	9.47509	HC_cycler	LD
Dyrk2	5:LNd_Trissin	0.839168	5.83338	0.0009	2.67528e-12	8.27898e-10	15.5338	2.42463	6.40667	HC_cycler	LD
pum	5:LNd_Trissin	0.926218	6.72558	0.0002	1.54258e-11	4.43272e-09	22.0638	6.56378	3.36145	HC_cycler	LD
Bacc	5:LNd_Trissin	0.591169	11.9207	0.0128	1.73558e-11	4.65483e-09	20.9659	4.48731	4.67226	HC_cycler	LD
Sytbeta	5:LNd_Trissin	0.79449	8.42092	0.0002	6.37629e-11	1.60324e-08	8.93234	2.17754	4.10204	HC_cycler	LD
CG43658	5:LNd_Trissin	0.60575	16.6933	0.0169	8.4607e-11	2.0022e-08	6.9128	0.643564	10.7414	HC_cycler	LD
CG4341	5:LNd_Trissin	0.712137	7.58364	0.0059	1.08885e-10	2.30551e-08	25.695	2.11954	12.1229	HC_cycler	LD
wry	5:LNd_Trissin	0.729818	6.3323	0.011	1.08885e-10	2.30551e-08	7.19949	1.1845	6.07809	HC_cycler	LD
vri	5:LNd_Trissin	0.780743	15.0071	0.0016	1.21756e-10	2.44912e-08	9.12402	0.134664	67.7537	HC_cycler	LD
Mapmodulin	5:LNd_Trissin	0.882994	6.01066	0.0024	2.0608e-10	3.94791e-08	5.1516	1.09667	4.69751	HC_cycler	LD
CG14082	5:LNd_Trissin	0.583162	16.4061	0.0027	2.63555e-10	4.81946e-08	6.40944	0.0406504	157.672	HC_cycler	LD
HDAC4	5:LNd_Trissin	0.60945	20.1426	0.0043	4.29132e-10	7.50607e-08	10.0126	1.24589	8.03648	HC_cycler	LD
CG43737	5:LNd_Trissin	0.666775	5.17626	0.0109	9.2805e-10	1.49342e-07	13.1398	3.15116	4.16984	HC_cycler	LD
nmo	5:LNd_Trissin	0.819261	6.29549	0.0034	9.03664e-10	1.49342e-07	27.0532	6.94732	3.89405	HC_cycler	LD
Dscam2	5:LNd_Trissin	0.710942	4.92508	0.0061	9.78095e-10	1.51341e-07	8.9286	0.756816	11.7976	HC_cycler	LD
CG15765	5:LNd_Trissin	0.845406	10.3946	0.0008	2.41897e-09	3.60427e-07	4.52371	0.692896	6.52869	HC_cycler	LD
TkR86C	5:LNd_Trissin	0.803446	17.2293	0.001	3.62967e-09	5.21506e-07	1.73278	0	2.1	HC_cycler	LD
kdn	5:LNd_Trissin	0.746679	6.85207	0.0045	5.02982e-09	6.97758e-07	2.33473	0.551157	4.23604	HC_cycler	LD
CG42750	5:LNd_Trissin	0.666552	5.69696	0.0143	5.69479e-09	7.63672e-07	6.14187	1.42288	4.31651	HC_cycler	LD
alphaTub84B	5:LNd_Trissin	0.928513	8.30078	0.0001	9.32323e-09	1.20991e-06	14.8688	5.7398	2.59047	HC_cycler	LD
Hr46	5:LNd_Trissin	0.711442	8.10782	0.0052	1.00349e-08	1.26157e-06	10.2352	2.47941	4.12809	HC_cycler	LD
CG42817	5:LNd_Trissin	0.838202	8.77299	0.0002	1.37531e-08	1.67662e-06	2.93862	0.548473	5.35783	HC_cycler	LD
CG7702	5:LNd_Trissin	0.884783	23.3583	0.0002	1.97176e-08	2.33306e-06	2.46874	0.190013	12.9924	HC_cycler	LD
dpr10	5:LNd_Trissin	0.770476	15.9856	0.0014	2.74843e-08	3.15912e-06	2.57856	0.0406504	63.4325	HC_cycler	LD
glob1	5:LNd_Trissin	0.700076	20.3806	0.0082	3.39499e-08	3.79391e-06	5.11085	0.0733163	69.7095	HC_cycler	LD
Gfrl	5:LNd_Trissin	0.681983	7.74256	0.0091	5.04297e-08	5.4832e-06	11.8517	3.09619	3.82784	HC_cycler	LD
FBgn0284243	5:LNd_Trissin	0.822121	5.90736	0.0018	5.79082e-08	6.11076e-06	7.10823	1.96814	3.61165	HC_cycler	LD
Nhe2	5:LNd_Trissin	0.815633	3.66511	0.0006	5.92393e-08	6.11076e-06	3.85552	0.300664	12.8234	HC_cycler	LD
nvy	5:LNd_Trissin	0.700831	8.71641	0.0024	6.95603e-08	6.99603e-06	4.13043	0.887271	4.65521	HC_cycler	LD
CG14509	5:LNd_Trissin	0.598262	16.6964	0.0056	1.63541e-07	1.53006e-05	17.2763	1.97817	8.73351	HC_cycler	LD
CG12702	5:LNd_Trissin	0.776002	20.9644	0.0005	1.99433e-07	1.78293e-05	1.99599	0.0262193	76.1269	HC_cycler	LD
amon	5:LNd_Trissin	0.64598	17.7041	0.0002	2.82892e-07	2.42143e-05	18.8663	4.59419	4.10655	HC_cycler	LD
Ten-m	5:LNd_Trissin	0.510907	6.46433	0.0391	3.01972e-07	2.5309e-05	9.78551	3.72413	2.62759	HC_cycler	LD
vvl	5:LNd_Trissin	0.529042	20.2452	0.0378	3.22142e-07	2.64485e-05	4.71037	0.121515	38.7636	HC_cycler	LD
Thor	5:LNd_Trissin	0.687783	9.11978	0.0128	3.36352e-07	2.70629e-05	6.7427	0.890776	7.56946	HC_cycler	LD
Rtnl1	5:LNd_Trissin	0.734357	7.3443	0.0051	3.58884e-07	2.83096e-05	14.9128	5.05857	2.94802	HC_cycler	LD
Ag5r2	5:LNd_Trissin	0.793246	21.2188	0.0003	3.82695e-07	2.96074e-05	5.16427	0.0262161	196.988	HC_cycler	LD
vib	5:LNd_Trissin	0.790755	9.03186	0.0011	4.44635e-07	3.37503e-05	10.0663	3.22727	3.11914	HC_cycler	LD
kek5	5:LNd_Trissin	0.547501	21.6361	0.0347	4.94481e-07	3.6169e-05	3.9003	0.156061	24.9922	HC_cycler	LD
CG31690	5:LNd_Trissin	0.633247	8.84938	0.0021	5.15932e-07	3.70642e-05	1.67691	0.117949	14.2173	HC_cycler	LD
PK2-R1	5:LNd_Trissin	0.804986	2.34832	0.0015	7.69827e-07	5.43336e-05	1.95679	0.0278289	70.3148	HC_cycler	LD
CG44153	5:LNd_Trissin	0.668304	14.8143	0.0064	8.9047e-07	6.0718e-05	2.52172	0.477075	5.28579	HC_cycler	LD
Tbh	5:LNd_Trissin	0.650598	5.32414	0.0123	8.9047e-07	6.0718e-05	12.616	4.24185	2.97416	HC_cycler	LD
Fas3	5:LNd_Trissin	0.842383	6.64681	0.0013	9.47835e-07	6.35524e-05	5.01854	0.543762	9.22929	HC_cycler	LD
Hsp23	5:LNd_Trissin	0.805519	5.89203	0.004	1.05084e-06	6.93036e-05	22.8838	5.49108	4.16745	HC_cycler	LD
br	5:LNd_Trissin	0.554009	20.7873	0.0263	1.31745e-06	8.2814e-05	12.2031	0.565125	21.5936	HC_cycler	LD
CG32333	5:LNd_Trissin	0.735483	7.62131	0.0008	1.42952e-06	8.84761e-05	1.82204	0.172557	10.5591	HC_cycler	LD
CG34353	5:LNd_Trissin	0.860985	16.9049	0.0002	1.45864e-06	8.89108e-05	4.60051	0.331224	13.8894	HC_cycler	LD
CG13868	5:LNd_Trissin	0.777535	15.4708	0.0011	1.51921e-06	9.12206e-05	4.32036	0.354462	12.1885	HC_cycler	LD
dally	5:LNd_Trissin	0.663906	15.5765	0.0033	2.05726e-06	0.000119947	2.79165	0.346763	8.0506	HC_cycler	LD
FBgn0284248	5:LNd_Trissin	0.560674	3.64955	0.013	2.09855e-06	0.000120607	6.13519	2.21012	2.77595	HC_cycler	LD
CG5065	5:LNd_Trissin	0.684435	7.18658	0.0054	2.61445e-06	0.00014814	2.24043	0.801564	2.79507	HC_cycler	LD
RhoGAP93B	5:LNd_Trissin	0.614426	6.5721	0.0119	2.94466e-06	0.000164533	1.20055	0.309043	3.88475	HC_cycler	LD
mtd	5:LNd_Trissin	0.67828	5.64856	0.0115	3.00288e-06	0.000165487	12.2726	5.20894	2.35606	HC_cycler	LD
slgA	5:LNd_Trissin	0.811861	6.58485	0.0021	3.06335e-06	0.000166538	3.10659	0.550709	5.64108	HC_cycler	LD
lilli	5:LNd_Trissin	0.769782	14.1172	0.0001	3.12381e-06	0.000167561	4.33011	1.43468	3.01818	HC_cycler	LD
CG4612	5:LNd_Trissin	0.643451	9.94627	0.0085	3.37981e-06	0.000176584	5.00348	1.53805	3.25313	HC_cycler	LD
Ant2	5:LNd_Trissin	0.736507	5.13821	0.006	3.65582e-06	0.000188556	16.3107	7.34142	2.22174	HC_cycler	LD
DIP-delta	5:LNd_Trissin	0.637987	6.35307	0.0171	3.87756e-06	0.000194993	10.5267	2.53887	4.14621	HC_cycler	LD
CG14438	5:LNd_Trissin	0.577926	19.8826	0.0197	4.27394e-06	0.00020875	7.49217	1.20709	6.20679	HC_cycler	LD
CG32547	5:LNd_Trissin	0.581835	15.3798	0.0149	4.61933e-06	0.00021863	8.41975	1.17713	7.15276	HC_cycler	LD
Toll-6	5:LNd_Trissin	0.840883	10.7668	0.0007	4.7106e-06	0.000220358	2.00983	0.252049	7.97395	HC_cycler	LD
uzip	5:LNd_Trissin	0.724143	5.76322	0.007	4.80188e-06	0.000222046	2.45857	0.386685	6.35809	HC_cycler	LD
CG44838	5:LNd_Trissin	0.773108	6.5707	0.0028	6.0508e-06	0.00027351	2.67264	0.846795	3.15618	HC_cycler	LD
2mit	5:LNd_Trissin	0.629175	17.0572	0.0161	6.16892e-06	0.000275751	5.34531	1.34247	3.98171	HC_cycler	LD
CG33639	5:LNd_Trissin	0.895217	4.26608	0.0005	6.28705e-06	0.000277943	2.13136	0.0772606	27.5867	HC_cycler	LD
Hsromega	5:LNd_Trissin	0.58471	10.4697	0.0271	7.04989e-06	0.00030172	75.4309	24.7128	3.0523	HC_cycler	LD
Mnt	5:LNd_Trissin	0.693482	14.1909	0.0055	7.9007e-06	0.000327675	5.19023	1.41548	3.66677	HC_cycler	LD
EcR	5:LNd_Trissin	0.522343	13.7867	0.0264	8.20547e-06	0.000336843	3.40928	0.886687	3.84496	HC_cycler	LD
rdx	5:LNd_Trissin	0.595158	10.7451	0.019	9.01884e-06	0.000362828	6.60712	1.90536	3.46766	HC_cycler	LD
Trpm	5:LNd_Trissin	0.549519	16.1559	0.0136	9.01884e-06	0.000362828	8.18797	1.26239	6.48609	HC_cycler	LD
Hr4	5:LNd_Trissin	0.510163	20.9002	0.0207	9.72307e-06	0.000387286	27.1297	1.94406	13.9552	HC_cycler	LD
CG10947	5:LNd_Trissin	0.544239	15.0842	0.0062	1.15026e-05	0.000440712	0.977006	0.0211431	46.2092	HC_cycler	LD
Pdk1	5:LNd_Trissin	0.620409	14.1534	0.0111	1.19386e-05	0.000453105	1.97038	0.352478	5.59007	HC_cycler	LD
CG13506	5:LNd_Trissin	0.590044	10.796	0.0205	1.21645e-05	0.000457364	1.29327	0	2.1	HC_cycler	LD
dpr13	5:LNd_Trissin	0.704148	14.5408	0.0031	1.28586e-05	0.000474587	2.52459	0.320154	7.88555	HC_cycler	LD
CG15236	5:LNd_Trissin	0.518273	6.39698	0.0142	1.35947e-05	0.000492715	2.66826	0.287066	9.29493	HC_cycler	LD
Csk	5:LNd_Trissin	0.57544	23.0457	0.0205	1.35947e-05	0.000492715	3.41736	0.493126	6.93	HC_cycler	LD
CG32052	5:LNd_Trissin	0.586994	5.36555	0.0198	1.60414e-05	0.000571104	4.51189	1.15011	3.923	HC_cycler	LD
Df31	5:LNd_Trissin	0.760727	8.52831	0.0034	1.66401e-05	0.000582114	7.08386	3.50047	2.02369	HC_cycler	LD
Mid1	5:LNd_Trissin	0.552129	10.5862	0.0417	1.66401e-05	0.000582114	10.3769	4.29028	2.4187	HC_cycler	LD
cv-2	5:LNd_Trissin	0.596267	13.0489	0.0022	1.69501e-05	0.000582821	1.55087	0.0732616	21.169	HC_cycler	LD
stai	5:LNd_Trissin	0.66787	5.89272	0.0098	1.69501e-05	0.000582821	6.90993	2.39895	2.8804	HC_cycler	LD
fne	5:LNd_Trissin	0.672362	6.33442	0.015	1.726e-05	0.000588449	42.2635	20.629	2.04874	HC_cycler	LD
CG32137	5:LNd_Trissin	0.804755	4.11623	0.0015	2.14673e-05	0.000713744	0.840346	0	2.1	HC_cycler	LD
Eip74EF	5:LNd_Trissin	0.500563	8.07648	0.0487	2.26661e-05	0.000747423	2.37563	0	2.1	HC_cycler	LD
tau	5:LNd_Trissin	0.706943	7.22924	0.0064	2.57026e-05	0.000827213	4.75005	1.55977	3.04536	HC_cycler	LD
gish	5:LNd_Trissin	0.763958	6.57671	0.0004	3.01887e-05	0.000948821	4.47226	1.75184	2.5529	HC_cycler	LD
CG9521	5:LNd_Trissin	0.596653	20.9619	0.0068	3.24109e-05	0.00101077	1.65611	0.122602	13.508	HC_cycler	LD
Ace	5:LNd_Trissin	0.757387	10.1246	0.0037	3.54026e-05	0.00107897	10.509	4.57155	2.29878	HC_cycler	LD
Reph	5:LNd_Trissin	0.518245	17.4225	0.002	3.6038e-05	0.00109008	7.87826	1.64465	4.79024	HC_cycler	LD
Oda	5:LNd_Trissin	0.703772	9.23841	0.0002	3.79875e-05	0.0011155	27.1185	11.26	2.4084	HC_cycler	LD
CR45316	5:LNd_Trissin	0.735084	21.5659	0.0017	3.86669e-05	0.00112722	3.61922	0.202265	17.8935	HC_cycler	LD
beat-IIIc	5:LNd_Trissin	0.880744	7.16775	0.0002	4.00487e-05	0.00115911	2.09087	0.239717	8.72221	HC_cycler	LD
porin	5:LNd_Trissin	0.795417	5.32799	0.0037	4.22036e-05	0.00121275	9.98026	5.02788	1.98499	HC_cycler	LD
PVRAP	5:LNd_Trissin	0.805172	14.4764	0.0006	4.29544e-05	0.00122557	3.49537	0.428009	8.16657	HC_cycler	LD
Pis	5:LNd_Trissin	0.608385	10.2111	0.0163	4.44812e-05	0.00125139	3.91228	0.750782	5.21094	HC_cycler	LD
Hsp83	5:LNd_Trissin	0.682107	11.2749	0.0038	5.11197e-05	0.00139901	5.38545	1.68382	3.19835	HC_cycler	LD
unk	5:LNd_Trissin	0.655409	12.0387	0.0088	5.67046e-05	0.00154137	6.42815	1.87382	3.43051	HC_cycler	LD
Syt4	5:LNd_Trissin	0.53777	8.68859	0.0392	5.76818e-05	0.00155741	8.98099	3.68643	2.43623	HC_cycler	LD
Pep	5:LNd_Trissin	0.767901	4.78212	0.0007	5.86915e-05	0.00157411	5.28312	2.09543	2.52126	HC_cycler	LD
fax	5:LNd_Trissin	0.58417	6.98926	0.0281	5.97012e-05	0.00158012	33.8453	17.2425	1.9629	HC_cycler	LD
CG10144	5:LNd_Trissin	0.595254	20.8728	0.0169	6.07443e-05	0.00158685	2.91186	0.0583468	49.9061	HC_cycler	LD
CG5334	5:LNd_Trissin	0.61706	20.6826	0.0087	6.07443e-05	0.00158685	4.72571	0.236803	19.9563	HC_cycler	LD
Acsl	5:LNd_Trissin	0.636742	10.2754	0.0113	6.28652e-05	0.0016212	1.40649	0.257259	5.46719	HC_cycler	LD
CG32017	5:LNd_Trissin	0.531648	11.7888	0.0415	6.73193e-05	0.00169266	3.2487	1.15148	2.82134	HC_cycler	LD
Grip84	5:LNd_Trissin	0.539634	19.5186	0.0428	6.84692e-05	0.00171088	3.57339	0.834339	4.28291	HC_cycler	LD
Fili	5:LNd_Trissin	0.718389	3.20798	0.0002	7.71406e-05	0.0018923	1.40517	0.0679885	20.6677	HC_cycler	LD
Atpalpha	5:LNd_Trissin	0.610267	7.3829	0.0152	7.8449e-05	0.00190121	81.5474	39.0309	2.0893	HC_cycler	LD
CG33695	5:LNd_Trissin	0.509689	23.7459	0.0469	7.8449e-05	0.00190121	2.48916	0.15644	15.9112	HC_cycler	LD
Dop1R1	5:LNd_Trissin	0.582334	6.74692	0.0257	7.98001e-05	0.00192237	5.8112	1.37078	4.23934	HC_cycler	LD
Akap200	5:LNd_Trissin	0.534974	6.02356	0.0291	8.25462e-05	0.00197669	1.91901	0.527799	3.63587	HC_cycler	LD
wap	5:LNd_Trissin	0.589924	10.8756	0.0238	8.68222e-05	0.00205462	1.52736	0.34766	4.39327	HC_cycler	LD
Trissin	5:LNd_Trissin	0.530687	3.69021	0.0286	9.60372e-05	0.00223328	180.604	85.5225	2.11177	HC_cycler	LD
CG42402	5:LNd_Trissin	0.701899	15.5814	0.0073	9.76733e-05	0.00224537	2.86059	0.250306	11.4284	HC_cycler	LD
aret	5:LNd_Trissin	0.658499	19.8693	0.0107	0.000100998	0.00226992	12.9738	1.44681	8.96719	HC_cycler	LD
jp	5:LNd_Trissin	0.574456	5.41493	0.0244	0.000100998	0.00226992	2.1091	0.797191	2.64567	HC_cycler	LD
SPR	5:LNd_Trissin	0.634266	2.71459	0.0003	0.000100998	0.00226992	2.89857	0.21552	13.4492	HC_cycler	LD
Pvr	5:LNd_Trissin	0.550698	15.9853	0.0258	0.000113484	0.00249478	0.973373	0.0981774	9.91443	HC_cycler	LD
luna	5:LNd_Trissin	0.569532	17.3306	0.0021	0.0001154	0.00252311	4.58736	1.02526	4.47434	HC_cycler	LD
spir	5:LNd_Trissin	0.532147	12.2359	0.021	0.000129557	0.00274321	2.77682	0.436381	6.36331	HC_cycler	LD
CG13954	5:LNd_Trissin	0.786227	9.43436	0.0007	0.000131729	0.00277458	6.30743	2.56405	2.45994	HC_cycler	LD
kuz	5:LNd_Trissin	0.662884	2.9196	0.0017	0.0001339	0.00280562	6.45631	0.887774	7.27248	HC_cycler	LD
CG42260	5:LNd_Trissin	0.53763	7.46898	0.0126	0.000143001	0.00289091	4.44889	0.309814	14.3599	HC_cycler	LD
dpr12	5:LNd_Trissin	0.533625	11.4292	0.0364	0.000143001	0.00289091	6.86637	2.06444	3.32603	HC_cycler	LD
PRL-1	5:LNd_Trissin	0.510743	15.9517	0.0373	0.00014069	0.00289091	3.98569	1.37534	2.89798	HC_cycler	LD
TER94	5:LNd_Trissin	0.568595	10.8259	0.0156	0.000143001	0.00289091	1.54184	0.396275	3.89084	HC_cycler	LD
Hr51	5:LNd_Trissin	0.502084	6.63632	0.0498	0.000150225	0.00302178	1.61413	0.362959	4.44714	HC_cycler	LD
rut	5:LNd_Trissin	0.597818	20.3927	0.0075	0.000152684	0.00304082	17.317	3.22291	5.37309	HC_cycler	LD
sNPF	5:LNd_Trissin	0.548083	4.83726	0.0307	0.000168377	0.00330429	19.4392	8.90041	2.18408	HC_cycler	LD
LpR1	5:LNd_Trissin	0.672573	15.9461	0.0078	0.000188632	0.00363094	1.41816	0.251162	5.64642	HC_cycler	LD
CG13995	5:LNd_Trissin	0.604818	5.1195	0.0227	0.000197964	0.00379242	2.57519	0.327174	7.87103	HC_cycler	LD
Hsc70-3	5:LNd_Trissin	0.553119	9.33633	0.0339	0.000239944	0.00444836	12.7993	5.19486	2.46384	HC_cycler	LD
CG13375	5:LNd_Trissin	0.552968	7.51801	0.0199	0.000243826	0.00447905	2.66734	0.373345	7.14446	HC_cycler	LD
Nrt	5:LNd_Trissin	0.554162	8.61953	0.014	0.000243826	0.00447905	2.2641	0.247964	9.13074	HC_cycler	LD
CG1358	5:LNd_Trissin	0.683384	8.8663	0.0033	0.000263954	0.00478328	1.27416	0.154864	8.22759	HC_cycler	LD
be	5:LNd_Trissin	0.56421	0.0409409	0.0238	0.000268201	0.00481685	2.07844	0.153324	13.5559	HC_cycler	LD
Tsp3A	5:LNd_Trissin	0.552045	19.9677	0.0344	0.000272448	0.00487138	1.27146	0.0133313	95.3738	HC_cycler	LD
tou	5:LNd_Trissin	0.777353	5.24775	0.0019	0.000290215	0.00514333	4.4889	1.93908	2.31496	HC_cycler	LD
CG42747	5:LNd_Trissin	0.581625	21.0588	0.0105	0.000329071	0.00575588	3.7523	0.31198	12.0274	HC_cycler	LD
osp	5:LNd_Trissin	0.715545	21.861	0.0081	0.000329071	0.00575588	1.59088	0.117904	13.493	HC_cycler	LD
CG32103	5:LNd_Trissin	0.543977	9.18022	0.0399	0.000334297	0.00582198	0.980876	0.0635308	15.4394	HC_cycler	LD
CASK	5:LNd_Trissin	0.638374	7.17762	0.0159	0.000339523	0.00586223	17.6995	10.3622	1.70808	HC_cycler	LD
Spn	5:LNd_Trissin	0.760308	20.4764	0.0038	0.000344905	0.00590448	6.74945	3.13105	2.15565	HC_cycler	LD
pdm3	5:LNd_Trissin	0.675437	5.27418	0.0115	0.000361371	0.00608282	2.58196	0.81778	3.15728	HC_cycler	LD
Inos	5:LNd_Trissin	0.566364	10.002	0.0297	0.000367077	0.00615313	0.84822	0	2.1	HC_cycler	LD
FBgn0283741	5:LNd_Trissin	0.528012	20.1513	0.0303	0.00037866	0.00629482	6.75546	1.41516	4.77363	HC_cycler	LD
flw	5:LNd_Trissin	0.683591	20.6189	0.0055	0.00037866	0.00629482	7.39372	2.28222	3.2397	HC_cycler	LD
fwe	5:LNd_Trissin	0.538368	9.53777	0.0143	0.000396634	0.0065129	10.8301	2.4893	4.35066	HC_cycler	LD
CR40469	5:LNd_Trissin	0.545318	17.6356	0.0334	0.000402863	0.0065616	3.22599	1.1129	2.89873	HC_cycler	LD
CG3530	5:LNd_Trissin	0.569866	5.31736	0.0262	0.000409091	0.00663618	2.36045	0.71994	3.27868	HC_cycler	LD
dpr17	5:LNd_Trissin	0.550486	14.5077	0.0168	0.000415502	0.00671312	5.01152	1.86767	2.68331	HC_cycler	LD
CG42240	5:LNd_Trissin	0.696391	2.99895	0.0088	0.000428514	0.00689565	2.03624	0.518505	3.92713	HC_cycler	LD
dock	5:LNd_Trissin	0.722832	6.60974	0.0041	0.000435114	0.00694629	1.41788	0.305339	4.64363	HC_cycler	LD
RpL7A	5:LNd_Trissin	0.714769	21.565	0.0055	0.000462687	0.00721469	4.62449	2.30134	2.00948	HC_cycler	LD
Sytalpha	5:LNd_Trissin	0.649345	7.74238	0.0046	0.000469884	0.00727055	2.69786	0.763344	3.53426	HC_cycler	LD
CG45002	5:LNd_Trissin	0.537153	9.57786	0.0248	0.000491894	0.0074958	8.93152	3.08481	2.89532	HC_cycler	LD
Irk1	5:LNd_Trissin	0.549637	17.6286	0.0305	0.000507139	0.00767	1.06078	0.0542827	19.5417	HC_cycler	LD
CG33129	5:LNd_Trissin	0.566787	10.1326	0.0004	0.000538967	0.00800098	4.48935	0.624207	7.19208	HC_cycler	LD
CR44779	5:LNd_Trissin	0.596702	23.6117	0.0127	0.000538967	0.00800098	1.14169	0.141198	8.08573	HC_cycler	LD
CG9281	5:LNd_Trissin	0.510744	8.8256	0.0188	0.000581453	0.00850613	3.20767	0.430037	7.45905	HC_cycler	LD
Pabp2	5:LNd_Trissin	0.724043	14.7541	0.003	0.000617628	0.008874	1.96278	0.441799	4.44271	HC_cycler	LD
CG5885	5:LNd_Trissin	0.569697	10.8409	0.0352	0.00062693	0.00894375	1.67618	0.293942	5.70242	HC_cycler	LD
CG11221	5:LNd_Trissin	0.555281	1.51304	0.0202	0.000685989	0.00971737	1.55453	0.201577	7.71187	HC_cycler	LD
crp	5:LNd_Trissin	0.727826	9.00821	0.0017	0.000696397	0.00979583	3.42509	1.27789	2.68027	HC_cycler	LD
Baldspot	5:LNd_Trissin	0.600598	10.7368	0.0019	0.000706806	0.0099076	3.13092	0.756138	4.14067	HC_cycler	LD
CG11138	5:LNd_Trissin	0.84808	7.13792	0.0008	0.000728215	0.0100674	5.49886	1.95538	2.81217	HC_cycler	LD
SK	5:LNd_Trissin	0.704121	15.6145	0.0097	0.000728215	0.0100674	16.5908	7.60694	2.18102	HC_cycler	LD
VhaSFD	5:LNd_Trissin	0.597989	12.1239	0.0244	0.000739222	0.0101846	3.30298	1.30423	2.53252	HC_cycler	LD
bru-2	5:LNd_Trissin	0.604849	17.7732	0.0214	0.000922676	0.0125403	3.70859	0.213304	17.3865	HC_cycler	LD
CG5549	5:LNd_Trissin	0.584161	8.51533	0.0276	0.000936409	0.0125992	2.16775	0.69444	3.12158	HC_cycler	LD
igl	5:LNd_Trissin	0.615004	14.1796	0.0146	0.000936409	0.0125992	2.8712	0.675093	4.25305	HC_cycler	LD
NaCP60E	5:LNd_Trissin	0.620206	23.1949	0.0061	0.00097837	0.01299	3.45823	1.4373	2.40606	HC_cycler	LD
Ald	5:LNd_Trissin	0.569828	6.49354	0.0252	0.000992875	0.0131393	4.72612	2.37078	1.99349	HC_cycler	LD
b6	5:LNd_Trissin	0.595227	19.9134	0.0134	0.00100738	0.0132009	0.812223	0.0304414	26.6815	HC_cycler	LD
CG14186	5:LNd_Trissin	0.518943	14.9933	0.0354	0.00102229	0.0133528	2.2538	0.457648	4.92474	HC_cycler	LD
dpr11	5:LNd_Trissin	0.614362	10.2021	0.0177	0.00103719	0.0135036	2.2684	0.648646	3.49713	HC_cycler	LD
CG32772	5:LNd_Trissin	0.512082	15.2891	0.0271	0.00106783	0.0138576	1.58258	0.394371	4.01293	HC_cycler	LD
ckn	5:LNd_Trissin	0.584864	6.82163	0.028	0.00121655	0.0155866	1.25294	0.142064	8.81952	HC_cycler	LD
CG43427	5:LNd_Trissin	0.515809	3.2961	0.0116	0.00127011	0.0160681	3.51079	0.641524	5.47258	HC_cycler	LD
CG11319	5:LNd_Trissin	0.851277	17.721	0.001	0.00132612	0.0166199	2.89511	0.584839	4.95027	HC_cycler	LD
CG31705	5:LNd_Trissin	0.540386	17.958	0.0347	0.00134513	0.016702	0.976536	0.135803	7.19083	HC_cycler	LD
Drat	5:LNd_Trissin	0.568493	18.1293	0.0195	0.00134513	0.016702	4.23735	1.62916	2.60094	HC_cycler	LD
ndl	5:LNd_Trissin	0.548747	19.8552	0.0146	0.00134513	0.016702	2.38264	0.0460232	51.7705	HC_cycler	LD
Shab	5:LNd_Trissin	0.511469	7.01614	0.0388	0.00138416	0.0170813	4.46564	1.43596	3.10987	HC_cycler	LD
Nckx30C	5:LNd_Trissin	0.591245	15.6799	0.011	0.00140421	0.0172757	9.92317	5.6329	1.76164	HC_cycler	LD
Calr	5:LNd_Trissin	0.75974	7.1218	0.0017	0.00148657	0.017799	4.45762	1.81687	2.45346	HC_cycler	LD
Pdcd4	5:LNd_Trissin	0.687721	4.1122	0.0083	0.00148657	0.017799	5.22281	2.90269	1.7993	HC_cycler	LD
cry	5:LNd_Trissin	0.62674	7.64084	0.0153	0.00150771	0.0178923	3.5282	0.943846	3.73811	HC_cycler	LD
SREBP	5:LNd_Trissin	0.572801	9.12527	0.0055	0.00150771	0.0178923	2.28977	0.0317654	72.0837	HC_cycler	LD
Sap47	5:LNd_Trissin	0.509002	9.1381	0.0412	0.00164145	0.0191408	40.3067	23.9232	1.68484	HC_cycler	LD
SC35	5:LNd_Trissin	0.6674	20.6003	0.0129	0.00171255	0.0197977	2.75173	0.460662	5.97342	HC_cycler	LD
CG11768	5:LNd_Trissin	0.669046	16.4207	0.0096	0.00173667	0.0199618	2.09099	0.628014	3.32953	HC_cycler	LD
CG42795	5:LNd_Trissin	0.675901	8.90918	0.0136	0.00176143	0.0201887	4.89348	1.80344	2.71342	HC_cycler	LD
app	5:LNd_Trissin	0.512324	8.46842	0.0387	0.00186309	0.0212932	1.60235	0.392777	4.07953	HC_cycler	LD
Pax	5:LNd_Trissin	0.503388	1.91337	0.0467	0.00191594	0.0216512	0.953636	0.0571211	16.695	HC_cycler	LD
per	5:LNd_Trissin	0.515728	14.7676	0.02	0.00191594	0.0216512	5.2503	0.389455	13.4812	HC_cycler	LD
Calx	5:LNd_Trissin	0.67481	10.2986	0.0106	0.00197019	0.0220781	1.13023	0.226609	4.98759	HC_cycler	LD
Syp	5:LNd_Trissin	0.616092	10.6066	0.0066	0.00202585	0.0223288	5.39813	1.7502	3.08429	HC_cycler	LD
CG13594	5:LNd_Trissin	0.72299	3.61526	0.0058	0.00220175	0.0238109	1.15859	0	2.1	HC_cycler	LD
mmd	5:LNd_Trissin	0.641932	1.59514	0.0072	0.00242465	0.0259424	10.0596	5.87955	1.71095	HC_cycler	LD
nolo	5:LNd_Trissin	0.572422	17.3514	0.0149	0.00245839	0.0262337	1.45714	0.328092	4.44124	HC_cycler	LD
Drep2	5:LNd_Trissin	0.696578	8.83892	0.0048	0.00249214	0.0265234	2.27859	0.718077	3.17318	HC_cycler	LD
Fas2	5:LNd_Trissin	0.593786	17.5874	0.0272	0.00252675	0.0267503	1.10225	0.217633	5.0647	HC_cycler	LD
pk	5:LNd_Trissin	0.663138	21.5368	0.0097	0.00252675	0.0267503	1.21048	0.0128879	93.9235	HC_cycler	LD
blw	5:LNd_Trissin	0.60288	4.28434	0.0198	0.00256136	0.0269748	9.29592	5.25998	1.76729	HC_cycler	LD
Mmp2	5:LNd_Trissin	0.539132	16.1185	0.0302	0.00266879	0.0278871	5.4175	1.16071	4.66742	HC_cycler	LD
sima	5:LNd_Trissin	0.681809	18.1518	0.009	0.00266879	0.0278871	3.35405	0.69133	4.85159	HC_cycler	LD
CG1513	5:LNd_Trissin	0.615315	8.45592	0.0088	0.00270521	0.0281944	1.09518	0.285889	3.83078	HC_cycler	LD
Amun	5:LNd_Trissin	0.679646	6.27679	0.0023	0.00297533	0.0305351	2.06908	0.447034	4.62847	HC_cycler	LD
CG31475	5:LNd_Trissin	0.579198	2.2039	0.0158	0.00297533	0.0305351	2.70962	0.423229	6.40226	HC_cycler	LD
Prx5	5:LNd_Trissin	0.620179	1.8661	0.0131	0.00305691	0.0309772	1.51712	0.459626	3.30077	HC_cycler	LD
unc-104	5:LNd_Trissin	0.741552	11.5089	0.0028	0.0030982	0.0313168	17.0504	9.45675	1.80299	HC_cycler	LD
CG14853	5:LNd_Trissin	0.509446	4.64314	0.0468	0.00331422	0.0330846	1.49785	0.286249	5.23269	HC_cycler	LD
CG32432	5:LNd_Trissin	0.564641	23.0125	0.0231	0.00331422	0.0330846	1.09163	0.11646	9.37341	HC_cycler	LD
cac	5:LNd_Trissin	0.542416	12.3394	0.0375	0.00340435	0.0335679	6.20907	3.31957	1.87044	HC_cycler	LD
CG42673	5:LNd_Trissin	0.563244	7.89024	0.028	0.00340435	0.0335679	1.47043	0.38093	3.86009	HC_cycler	LD
pan	5:LNd_Trissin	0.543583	18.5904	0.0015	0.00340435	0.0335679	7.87585	2.39885	3.28318	HC_cycler	LD
sfl	5:LNd_Trissin	0.59584	21.4352	0.0067	0.00344997	0.0336059	3.51694	0.507923	6.92415	HC_cycler	LD
CG8108	5:LNd_Trissin	0.531688	13.847	0.0388	0.00359144	0.0345655	1.42767	0.666323	2.1426	HC_cycler	LD
CG34370	5:LNd_Trissin	0.540651	19.6827	0.0283	0.00399448	0.0374587	1.93521	0.408487	4.73751	HC_cycler	LD
Pmp70	5:LNd_Trissin	0.627363	20.5802	0.0167	0.00432373	0.039804	1.84385	0.186907	9.86506	HC_cycler	LD
CG8026	5:LNd_Trissin	0.599434	9.43277	0.024	0.00455695	0.0413829	1.29981	0.149583	8.68951	HC_cycler	LD
His4r	5:LNd_Trissin	0.531605	8.20984	0.0182	0.00499282	0.0441453	10.8182	4.9094	2.20356	HC_cycler	LD
Fkbp14	5:LNd_Trissin	0.796586	15.0234	0.0006	0.00505859	0.0446287	1.4209	0.161513	8.79742	HC_cycler	LD
RpS8	5:LNd_Trissin	0.578446	2.40949	0.0006	0.0051917	0.0450134	5.68712	2.76798	2.05461	HC_cycler	LD
CG42389	5:LNd_Trissin	0.68112	7.54684	0.0064	0.00553832	0.0476082	5.19316	2.44543	2.12362	HC_cycler	LD
CG5273	5:LNd_Trissin	0.502711	0.852449	0.0438	0.00561066	0.0480249	1.39419	0.128107	10.883	HC_cycler	LD
CG8861	5:LNd_Trissin	0.621992	2.04711	0.013	0.005683	0.048438	4.37383	1.20547	3.62834	HC_cycler	LD
Unc-115a	5:LNd_Trissin	0.583582	6.45231	0.025	0.00575708	0.0487595	1.41521	0.557257	2.5396	HC_cycler	LD
chrb	5:LNd_Trissin	0.552717	10.4416	0.0374	0.00583116	0.0489745	15.1257	8.55279	1.76851	HC_cycler	LD
Ranbp16	5:LNd_Trissin	0.512963	15.2635	0.0378	0.00583116	0.0489745	0.827556	0.188455	4.39127	HC_cycler	LD
Argk	6:DN1p	0.949728	2.96729	0.0001	1.4314e-19	5.75851e-16	19.5116	1.61593	12.0745	HC_cycler	LD
tim	6:DN1p	0.961103	14.1744	0.0001	1.62562e-17	3.26993e-14	29.7968	0.913695	32.6113	HC_cycler	LD
Pdp1	6:DN1p	0.872407	16.0245	0.0005	1.76793e-15	2.3708e-12	141.401	37.8979	3.73111	HC_cycler	LD
vri	6:DN1p	0.932165	13.9749	0.0001	5.7903e-14	5.82359e-11	10.5513	0.24493	43.079	HC_cycler	LD
bru-3	6:DN1p	0.831483	23.5901	0.0011	4.03648e-11	3.24775e-08	118.686	39.6199	2.99561	HC_cycler	LD
CG31324	6:DN1p	0.751268	14.7577	0.0004	2.54173e-10	1.70423e-07	7.24443	0	2.1	HC_cycler	LD
CG13054	6:DN1p	0.836251	13.8834	0.0016	7.02466e-10	4.03717e-07	11.444	1.77578	6.44447	HC_cycler	LD
CG42342	6:DN1p	0.911753	13.9475	0.0001	9.54186e-10	4.79837e-07	10.5895	2.02882	5.21955	HC_cycler	LD
Sdc	6:DN1p	0.871197	14.0374	0.0003	1.8099e-09	8.09027e-07	12.6728	3.30561	3.83371	HC_cycler	LD
CG44422	6:DN1p	0.728685	13.1462	0.0029	5.05302e-09	2.03283e-06	7.12455	1.07301	6.63976	HC_cycler	LD
CG15765	6:DN1p	0.64979	1.81812	0.0068	7.22959e-09	2.64406e-06	46.4805	11.1025	4.18651	HC_cycler	LD
Pxn	6:DN1p	0.792954	11.9768	0.0015	1.22789e-08	4.1165e-06	5.7974	0.711727	8.14554	HC_cycler	LD
A2bp1	6:DN1p	0.808536	12.133	0.001	1.46071e-08	4.19745e-06	17.1296	4.83121	3.54562	HC_cycler	LD
Octbeta1R	6:DN1p	0.803096	10.0829	0.0001	1.41163e-08	4.19745e-06	9.32423	1.54774	6.0244	HC_cycler	LD
CG45002	6:DN1p	0.592122	8.81201	0.0245	7.37498e-08	1.85435e-05	8.77447	3.02805	2.89773	HC_cycler	LD
beat-IIIc	6:DN1p	0.617545	10.3871	0.0133	9.57158e-08	2.26509e-05	20.574	5.39203	3.81563	HC_cycler	LD
Clk	6:DN1p	0.698394	2.91859	0.0063	1.28012e-07	2.86107e-05	5.9341	0.293981	20.1853	HC_cycler	LD
dpr9	6:DN1p	0.686484	23.9669	0.0052	3.29208e-07	6.97054e-05	7.76996	0.968249	8.02475	HC_cycler	LD
CG32052	6:DN1p	0.830252	23.42	0.0002	3.83867e-07	7.3538e-05	5.13427	0.781558	6.56927	HC_cycler	LD
CG15628	6:DN1p	0.593581	12.0139	0.0267	5.20917e-07	9.52568e-05	7.20979	1.17072	6.15843	HC_cycler	LD
VepD	6:DN1p	0.707023	10.2631	0.0035	7.25975e-07	0.000116824	1.62799	0	2.1	HC_cycler	LD
VGlut	6:DN1p	0.704738	7.69421	0.0056	1.20062e-06	0.000185773	40.4161	19.3131	2.09268	HC_cycler	LD
Ddc	6:DN1p	0.809037	8.10824	0.0008	1.39003e-06	0.000207114	5.55176	1.79582	3.0915	HC_cycler	LD
chn	6:DN1p	0.755839	0.728649	0.003	1.51609e-06	0.000217829	9.10501	2.65738	3.42631	HC_cycler	LD
fne	6:DN1p	0.56206	3.23349	0.0292	1.70218e-06	0.000236134	47.919	22.503	2.12945	HC_cycler	LD
CG13203	6:DN1p	0.579972	18.4569	0.0153	1.96643e-06	0.000263698	2.79592	0.114541	24.4098	HC_cycler	LD
CG13594	6:DN1p	0.704082	13.1708	0.001	2.20495e-06	0.000286146	3.29014	0.483421	6.80596	HC_cycler	LD
Toll-6	6:DN1p	0.579205	23.7315	0.0204	2.40081e-06	0.000301827	8.52113	0.989337	8.61296	HC_cycler	LD
Eip63F-1	6:DN1p	0.701649	0.172569	0.007	3.09797e-06	0.000366563	5.77296	0.93018	6.20629	HC_cycler	LD
CG9705	6:DN1p	0.605502	11.7416	0.0261	3.56285e-06	0.000409524	4.14553	0.701499	5.90953	HC_cycler	LD
Dscam4	6:DN1p	0.675595	18.8001	0.0086	4.45064e-06	0.000497359	24.9833	6.87972	3.63144	HC_cycler	LD
dpr13	6:DN1p	0.675786	14.3494	0.0116	4.57711e-06	0.000497668	13.2369	3.05042	4.33936	HC_cycler	LD
Hipk	6:DN1p	0.768729	14.7229	0.0013	4.97018e-06	0.000526186	20.6464	8.0565	2.5627	HC_cycler	LD
cwo	6:DN1p	0.614947	13.5592	0.0173	5.39924e-06	0.000556953	7.2842	1.47576	4.93589	HC_cycler	LD
nAChRalpha6	6:DN1p	0.796198	13.2331	0.0019	8.33714e-06	0.000818056	10.3614	4.05285	2.55658	HC_cycler	LD
CG31183	6:DN1p	0.741391	12.8801	0.0025	8.79703e-06	0.00084263	1.64658	0	2.1	HC_cycler	LD
CG32369	6:DN1p	0.505915	22.8597	0.0197	1.06009e-05	0.000947721	4.50908	0.201623	22.3639	HC_cycler	LD
igl	6:DN1p	0.645656	13.1272	0.0159	1.11789e-05	0.000977666	27.0705	10.5591	2.5637	HC_cycler	LD
HnRNP-K	6:DN1p	0.640676	10.5771	0.0162	1.17868e-05	0.0010089	4.46562	0.460493	9.69747	HC_cycler	LD
HmgZ	6:DN1p	0.610188	15.8926	0.0179	1.3805e-05	0.00113342	10.4638	0.91491	11.437	HC_cycler	LD
Pu	6:DN1p	0.545898	12.1892	0.0189	2.03941e-05	0.00160874	3.40064	0.800841	4.24634	HC_cycler	LD
CG6959	6:DN1p	0.779495	10.9895	0.0021	2.37866e-05	0.00180554	2.58125	0.57626	4.47932	HC_cycler	LD
CG14082	6:DN1p	0.677287	12.4044	0.0072	3.6541e-05	0.00262508	4.1648	0	2.1	HC_cycler	LD
CG42750	6:DN1p	0.789093	9.84847	0.0034	5.04491e-05	0.00349926	3.77994	1.1269	3.35429	HC_cycler	LD
cmpy	6:DN1p	0.806997	20.3555	0.0014	5.84324e-05	0.0039843	3.3518	0.184013	18.215	HC_cycler	LD
Syp	6:DN1p	0.696072	7.59191	0.0062	7.62462e-05	0.00479279	6.92743	2.47882	2.79465	HC_cycler	LD
Mp	6:DN1p	0.88133	22.2759	0.0003	8.19596e-05	0.00507267	3.65024	0.862716	4.2311	HC_cycler	LD
Tet	6:DN1p	0.639513	12.1333	0.0149	0.000103975	0.00633775	9.56952	4.38399	2.18283	HC_cycler	LD
hig	6:DN1p	0.576845	14.0389	0.0145	0.000106432	0.0063907	13.0847	5.76019	2.27157	HC_cycler	LD
CG43737	6:DN1p	0.631431	10.9329	0.0085	0.000122559	0.00725079	9.46191	3.67955	2.57148	HC_cycler	LD
CG14509	6:DN1p	0.603491	6.25914	0.0106	0.000125494	0.00731682	3.51094	0.66646	5.26804	HC_cycler	LD
Nlg4	6:DN1p	0.608142	19.0142	0.0113	0.000128428	0.00738096	3.72941	0.515087	7.24036	HC_cycler	LD
CG2269	6:DN1p	0.773491	17.459	0.0021	0.000147669	0.00825101	69.8904	31.8864	2.19186	HC_cycler	LD
fz2	6:DN1p	0.736237	7.672	0.0008	0.00020839	0.0114843	2.91105	0.893575	3.25776	HC_cycler	LD
Ag5r2	6:DN1p	0.618582	20.5662	0.0092	0.000261147	0.0141972	6.33385	0.0376619	168.177	HC_cycler	LD
CG17816	6:DN1p	0.577499	5.34678	0.0018	0.000364215	0.0183155	7.59244	3.14571	2.41358	HC_cycler	LD
nolo	6:DN1p	0.68773	14.4083	0.0088	0.000389065	0.0193236	5.17995	0.173635	29.8324	HC_cycler	LD
CG15465	6:DN1p	0.531936	2.92971	0.0414	0.000415313	0.0201302	16.3507	6.13871	2.66353	HC_cycler	LD
Glut4EF	6:DN1p	0.634805	0.272894	0.0049	0.000415313	0.0201302	10.2106	4.59146	2.22382	HC_cycler	LD
cpo	6:DN1p	0.675144	14.9405	0.0033	0.000433789	0.0207754	11.902	5.55673	2.1419	HC_cycler	LD
CG44838	6:DN1p	0.735873	1.9394	0.0009	0.000463056	0.0216271	4.56332	2.10424	2.16863	HC_cycler	LD
chinmo	6:DN1p	0.573061	5.34198	0.001	0.000586372	0.025641	15.424	3.98931	3.86633	HC_cycler	LD
Ptp99A	6:DN1p	0.723256	4.13727	0.0019	0.000574115	0.025641	4.78702	1.92432	2.48764	HC_cycler	LD
Sik3	6:DN1p	0.700311	13.6836	0.0106	0.000586372	0.025641	2.04949	0.340292	6.02273	HC_cycler	LD
CG17193	6:DN1p	0.811567	8.12426	0.0021	0.000771945	0.0310554	4.35265	0.856183	5.08378	HC_cycler	LD
Btk29A	6:DN1p	0.770757	15.6859	0.0013	0.00093082	0.0356637	6.90394	1.77593	3.88751	HC_cycler	LD
4EHP	6:DN1p	0.550832	20.6199	0.0218	0.0010321	0.0388048	15.8416	7.85502	2.01675	HC_cycler	LD
Fur1	6:DN1p	0.661421	4.95866	0.0008	0.00126569	0.0454631	12.4733	1.78361	6.99331	HC_cycler	LD
CG15236	6:DN1p	0.561454	15.9762	0.0142	0.00145727	0.0496829	3.90336	0.546884	7.13745	HC_cycler	LD
tim	7:DN1p	0.938555	14.9924	0.0001	1.43025e-20	5.75389e-17	22.4373	0.897264	25.0064	HC_cycler	LD
AstA	7:DN1p	0.81133	2.85139	0.0006	4.54124e-14	9.13471e-11	69.1517	8.32643	8.30509	HC_cycler	LD
Pdp1	7:DN1p	0.899682	14.9386	0.0003	1.4544e-12	1.95035e-09	134.634	55.2471	2.43695	HC_cycler	LD
Dop1R1	7:DN1p	0.873635	12.809	0.0005	8.20699e-11	8.25418e-08	13.9067	1.54323	9.01143	HC_cycler	LD
Argk	7:DN1p	0.912841	3.16693	0.0001	6.18946e-10	4.98004e-07	10.2737	2.66981	3.8481	HC_cycler	LD
vri	7:DN1p	0.841448	13.9147	0.0029	1.9185e-09	1.28635e-06	8.26286	1.59662	5.17523	HC_cycler	LD
2mit	7:DN1p	0.799072	12.9947	0.0006	2.30885e-09	1.29547e-06	8.39984	0.816742	10.2846	HC_cycler	LD
nAChRalpha6	7:DN1p	0.851592	10.3839	0.0001	2.57613e-09	1.29547e-06	23.4055	4.29066	5.45498	HC_cycler	LD
Eip63F-1	7:DN1p	0.771193	1.30005	0.0007	7.86401e-09	3.51521e-06	8.08998	1.05144	7.69419	HC_cycler	LD
CG15236	7:DN1p	0.667983	15.5602	0.0016	2.3008e-08	9.2561e-06	5.32024	0.322914	16.4757	HC_cycler	LD
CG15628	7:DN1p	0.757853	12.1548	0.0024	3.01605e-08	1.10305e-05	9.40815	1.48671	6.32816	HC_cycler	LD
CG9705	7:DN1p	0.94899	11.9183	0.0001	1.49718e-07	5.01929e-05	4.09439	0.654895	6.25198	HC_cycler	LD
CG43340	7:DN1p	0.711074	1.1768	0.0019	1.33285e-06	0.000412465	2.0525	0.0996236	20.6025	HC_cycler	LD
CG31324	7:DN1p	0.73196	13.0122	0.0004	1.99458e-06	0.000534947	4.66828	0.338113	13.8069	HC_cycler	LD
CG6424	7:DN1p	0.705329	3.61253	0.0059	1.93766e-06	0.000534947	10.9928	2.79255	3.93649	HC_cycler	LD
CG45263	7:DN1p	0.762006	14.7853	0.0023	2.5742e-06	0.000647251	12.9058	5.14762	2.50714	HC_cycler	LD
Clk	7:DN1p	0.802591	2.81402	0.0013	3.70602e-06	0.000877019	4.7566	0.460547	10.3282	HC_cycler	LD
CG10289	7:DN1p	0.535817	19.1261	0.0361	4.49603e-06	0.00100486	96.8162	7.89043	12.2701	HC_cycler	LD
Rim	7:DN1p	0.788809	6.85779	0.0002	5.0182e-06	0.00106254	12.4485	5.78634	2.15136	HC_cycler	LD
CG4577	7:DN1p	0.727143	5.97804	0.008	5.59794e-06	0.00112603	8.06324	1.25899	6.40455	HC_cycler	LD
Pka-R1	7:DN1p	0.573817	4.62486	0.0185	6.95475e-06	0.00133233	7.24531	1.26411	5.73154	HC_cycler	LD
CG17777	7:DN1p	0.770018	21.5204	0.0011	9.34315e-06	0.00170852	3.29507	0.247513	13.3127	HC_cycler	LD
CG1358	7:DN1p	0.860437	2.84833	0.0003	9.85344e-06	0.0017235	3.99832	0.336546	11.8804	HC_cycler	LD
CG13532	7:DN1p	0.843155	10.304	0.0007	1.09548e-05	0.00183629	1.20768	0	2.1	HC_cycler	LD
CG13054	7:DN1p	0.724916	12.2881	0.0029	1.18528e-05	0.00190735	8.70741	0.649891	13.3983	HC_cycler	LD
sif	7:DN1p	0.776836	23.9351	0.0018	1.79845e-05	0.00258398	57.8103	26.5286	2.17917	HC_cycler	LD
CG7378	7:DN1p	0.786069	20.0076	0.0008	2.20836e-05	0.00296142	4.77426	0.630266	7.57499	HC_cycler	LD
chrb	7:DN1p	0.64623	6.69619	0.0039	2.20836e-05	0.00296142	19.2382	5.00949	3.84035	HC_cycler	LD
A2bp1	7:DN1p	0.783712	13.6758	0.0018	2.50887e-05	0.00325587	7.74668	2.71197	2.85648	HC_cycler	LD
CG32676	7:DN1p	0.674536	5.59775	0.0102	3.56766e-05	0.00422138	1.70236	0.0311736	54.6092	HC_cycler	LD
CG7702	7:DN1p	0.5765	21.3922	0.0229	3.39396e-05	0.00422138	3.04758	0.366751	8.30966	HC_cycler	LD
Hr4	7:DN1p	0.563087	19.8322	0.0225	3.47875e-05	0.00422138	21.1144	1.56213	13.5165	HC_cycler	LD
fne	7:DN1p	0.626272	2.76897	0.0012	4.03837e-05	0.00464181	45.1308	19.8554	2.27297	HC_cycler	LD
CG30089	7:DN1p	0.556215	0.705248	0.0319	4.57021e-05	0.00510721	4.92058	1.00944	4.87458	HC_cycler	LD
sick	7:DN1p	0.754034	12.0375	0.0023	5.2943e-05	0.00575648	4.93645	0.393773	12.5363	HC_cycler	LD
CG5830	7:DN1p	0.623298	7.72697	0.0181	6.27458e-05	0.00601015	2.15094	0	2.1	HC_cycler	LD
cwo	7:DN1p	0.86121	12.4373	0.0004	6.27458e-05	0.00601015	3.91199	1.16685	3.35259	HC_cycler	LD
lov	7:DN1p	0.56545	9.34682	0.0006	5.97776e-05	0.00601015	4.98675	0	2.1	HC_cycler	LD
Msp300	7:DN1p	0.794126	1.76274	0.0007	5.97776e-05	0.00601015	26.722	14.3881	1.85724	HC_cycler	LD
Act5C	7:DN1p	0.815682	8.27855	0.0003	6.58531e-05	0.00602106	13.4324	4.89035	2.74671	HC_cycler	LD
Mur2B	7:DN1p	0.66755	20.5891	0.0067	6.58531e-05	0.00602106	18.6488	2.68056	6.95705	HC_cycler	LD
CG32052	7:DN1p	0.741306	0.976933	0.0057	7.79359e-05	0.00667098	4.60798	0.838625	5.49468	HC_cycler	LD
nAChRalpha1	7:DN1p	0.783913	8.55429	0.0017	7.97996e-05	0.0066882	9.81052	3.00722	3.26232	HC_cycler	LD
svr	7:DN1p	0.871438	6.79732	0.0005	9.65081e-05	0.00792351	4.88353	1.53637	3.17861	HC_cycler	LD
Syp	7:DN1p	0.530062	11.4791	0.0264	0.000106053	0.00853305	6.60072	2.22933	2.96085	HC_cycler	LD
Ag5r2	7:DN1p	0.580259	21.0234	0.0186	0.000116485	0.00901193	5.75938	0	2.1	HC_cycler	LD
CG15765	7:DN1p	0.775377	13.1706	0.0025	0.000119271	0.00905338	13.0098	3.34378	3.89076	HC_cycler	LD
CG44837	7:DN1p	0.603016	14.54	0.0138	0.000133966	0.00998044	3.21783	0.519003	6.20001	HC_cycler	LD
Grip84	7:DN1p	0.512277	20.1055	0.0418	0.000150432	0.0106173	4.5941	0.344152	13.349	HC_cycler	LD
Uhg5	7:DN1p	0.806078	8.41293	0.0017	0.000180732	0.012536	0.892114	0	2.1	HC_cycler	LD
Ptp99A	7:DN1p	0.560032	7.97386	0.0311	0.000193464	0.0131916	3.64187	1.32521	2.74814	HC_cycler	LD
CG6123	7:DN1p	0.635854	3.48157	0.0087	0.00022161	0.0143796	4.51364	0.559063	8.07359	HC_cycler	LD
Xport-B	7:DN1p	0.610952	13.8111	0.0128	0.000242469	0.0152414	1.25758	0	2.1	HC_cycler	LD
Usp8	7:DN1p	0.7553	12.2539	0.0023	0.000248023	0.0153507	1.96134	0	2.1	HC_cycler	LD
Ndae1	7:DN1p	0.699246	7.34079	0.0025	0.000253578	0.0154567	4.95935	1.86691	2.65645	HC_cycler	LD
CG5347	7:DN1p	0.57141	20.7686	0.0163	0.000271206	0.0162845	4.33555	0.165653	26.1724	HC_cycler	LD
CG45002	7:DN1p	0.811858	9.25702	0.0007	0.000283547	0.0167751	4.26902	0.881998	4.84017	HC_cycler	LD
cana	7:DN1p	0.569435	19.7611	0.025	0.000309829	0.0175555	11.304	0.90476	12.4939	HC_cycler	LD
FBgn0284408	7:DN1p	0.725713	21.7185	0.0002	0.000309829	0.0175555	34.8518	3.67858	9.47426	HC_cycler	LD
H	7:DN1p	0.516763	8.60874	0.0069	0.000323813	0.0178452	1.04393	0	2.1	HC_cycler	LD
Octbeta1R	7:DN1p	0.749871	12.6986	0.0052	0.000385896	0.0209792	2.24823	0.369747	6.08044	HC_cycler	LD
CG43427	7:DN1p	0.562497	9.81168	0.0322	0.000394311	0.0211508	3.43549	0.937609	3.66409	HC_cycler	LD
CG42260	7:DN1p	0.633716	5.31881	0.0092	0.000403076	0.0213365	3.53874	0.973856	3.63374	HC_cycler	LD
CG14438	7:DN1p	0.708744	19.5985	0.0023	0.000420971	0.0219944	13.5806	1.1869	11.4422	HC_cycler	LD
dnc	7:DN1p	0.858199	22.2084	0.0003	0.000468922	0.0241856	36.4584	15.4088	2.36607	HC_cycler	LD
Cbp53E	7:DN1p	0.695945	5.14724	0.0021	0.000522182	0.0262592	2.64543	0.393561	6.72177	HC_cycler	LD
CG14712	7:DN1p	0.546414	19.9806	0.0349	0.000645852	0.0315135	2.14957	0	2.1	HC_cycler	LD
eag	7:DN1p	0.776613	20.1976	0.0005	0.000673667	0.0315135	8.83532	2.52868	3.49404	HC_cycler	LD
Mlf	7:DN1p	0.574412	8.6858	0.0178	0.000673667	0.0315135	1.3653	0.391322	3.48895	HC_cycler	LD
Ten-m	7:DN1p	0.602638	5.359	0.0082	0.000673667	0.0315135	6.96627	3.17722	2.19257	HC_cycler	LD
Ca-alpha1D	7:DN1p	0.649681	7.58398	0.0084	0.000717349	0.0317131	4.9235	2.09619	2.34879	HC_cycler	LD
CG6115	7:DN1p	0.654471	20.8443	0.0136	0.000702598	0.0317131	2.55392	0.412131	6.19686	HC_cycler	LD
Dh44	7:DN1p	0.711526	12.6025	0.0037	0.000702598	0.0317131	7.49191	1.3762	5.4439	HC_cycler	LD
DIP-theta	7:DN1p	0.805893	23.6759	0.0011	0.000687848	0.0317131	4.761	1.38055	3.44863	HC_cycler	LD
emc	7:DN1p	0.589168	9.08031	0.0271	0.000717349	0.0317131	5.00404	1.59037	3.14645	HC_cycler	LD
kek3	7:DN1p	0.564049	2.75102	0.0334	0.000748029	0.0323583	3.14845	0.368121	8.55278	HC_cycler	LD
br	7:DN1p	0.587908	22.1234	0.0105	0.000779932	0.0330281	15.6872	0.592582	26.4726	HC_cycler	LD
Nlg2	7:DN1p	0.640749	12.5901	0.0165	0.000779932	0.0330281	1.9812	0.331975	5.96793	HC_cycler	LD
CG42322	7:DN1p	0.543999	16.5962	0.034	0.000902063	0.0370306	4.156	1.5152	2.74287	HC_cycler	LD
CG43902	7:DN1p	0.755179	0.0462162	0.0035	0.000902063	0.0370306	6.92604	1.9465	3.55819	HC_cycler	LD
sli	7:DN1p	0.730579	4.74471	0.0098	0.000920692	0.0374136	2.42108	0.984128	2.46012	HC_cycler	LD
Top1	7:DN1p	0.712444	8.19457	0.0027	0.000999649	0.0398177	1.64352	0.523895	3.13711	HC_cycler	LD
rut	7:DN1p	0.617287	19.3929	0.0176	0.00104145	0.0410762	18.2387	4.1841	4.35905	HC_cycler	LD
side	7:DN1p	0.705887	12.9893	0.0047	0.00117686	0.045524	2.50951	0.0498437	50.3476	HC_cycler	LD
Amun	7:DN1p	0.802788	9.21745	0.0017	0.00120119	0.0460227	3.62352	0.772715	4.68933	HC_cycler	LD
fru	7:DN1p	0.745606	1.89511	0.0025	0.00132852	0.0494873	19.5358	10.5722	1.84785	HC_cycler	LD
tim	8:LN_ITP	0.915005	15.4442	0.0001	1.5282e-18	6.14794e-15	24.6679	0.787185	31.3369	HC_cycler	LD
Argk	8:LN_ITP	0.867118	6.58229	0.0008	6.75164e-16	1.35809e-12	22.8813	2.73254	8.37363	HC_cycler	LD
CG15628	8:LN_ITP	0.693468	14.592	0.0003	2.32509e-14	3.11795e-11	26.5623	2.23444	11.8877	HC_cycler	LD
FBgn0284243	8:LN_ITP	0.908738	5.79016	0.0003	1.05061e-13	1.05665e-10	7.98599	1.00688	7.93139	HC_cycler	LD
Bacc	8:LN_ITP	0.620346	12.9243	0.0006	1.98078e-12	1.32811e-09	25.5062	6.25372	4.07856	HC_cycler	LD
Sdc	8:LN_ITP	0.817517	8.14652	0.0008	1.98078e-12	1.32811e-09	24.4488	5.4701	4.46953	HC_cycler	LD
nmo	8:LN_ITP	0.729392	4.61087	0.0041	2.60002e-12	1.49427e-09	25.669	5.52635	4.64484	HC_cycler	LD
vri	8:LN_ITP	0.968108	12.9644	0.0001	7.90894e-12	3.97721e-09	7.82251	0.0800551	97.714	HC_cycler	LD
Pdp1	8:LN_ITP	0.804234	17.7901	0.0007	3.84579e-11	1.71907e-08	116.14	19.0296	6.10315	HC_cycler	LD
CG17777	8:LN_ITP	0.74222	0.951986	0.0043	6.32676e-11	2.54526e-08	19.1493	3.05296	6.27236	HC_cycler	LD
alphaTub84B	8:LN_ITP	0.807259	8.21746	0.0005	8.78092e-11	3.21142e-08	19.8395	5.0393	3.93695	HC_cycler	LD
2mit	8:LN_ITP	0.796412	16.0089	0.0011	1.88974e-10	6.33535e-08	6.7783	0.351516	19.283	HC_cycler	LD
Fkbp14	8:LN_ITP	0.894525	14.7554	0.0001	1.12216e-09	3.47266e-07	3.50291	0.584592	5.99207	HC_cycler	LD
CG34353	8:LN_ITP	0.742599	16.4486	0.0013	3.40183e-09	8.86382e-07	3.37932	0.492853	6.85664	HC_cycler	LD
CG43658	8:LN_ITP	0.608514	14.3456	0.0048	3.2784e-09	8.86382e-07	7.0166	0.506881	13.8427	HC_cycler	LD
kug	8:LN_ITP	0.683918	23.0169	0.0043	3.52526e-09	8.86382e-07	4.4668	0.273705	16.3198	HC_cycler	LD
Sytbeta	8:LN_ITP	0.743824	7.4271	0.001	5.42958e-09	1.28489e-06	7.24808	1.21103	5.98507	HC_cycler	LD
nrv1	8:LN_ITP	0.8233	4.17329	0.001	9.24019e-09	2.06518e-06	5.24828	1.1407	4.60091	HC_cycler	LD
igl	8:LN_ITP	0.764983	19.2086	0.0025	1.02578e-08	2.17194e-06	9.74926	1.54393	6.31456	HC_cycler	LD
CG15765	8:LN_ITP	0.780593	12.4276	0.0023	3.07303e-08	6.1814e-06	13.6774	4.54497	3.00936	HC_cycler	LD
Ald	8:LN_ITP	0.678282	6.44261	0.002	4.90108e-08	8.57263e-06	7.42829	2.64494	2.80849	HC_cycler	LD
dpr10	8:LN_ITP	0.704754	16.3984	0.003	4.58714e-08	8.57263e-06	4.11456	0.265173	15.5165	HC_cycler	LD
fne	8:LN_ITP	0.681813	4.04238	0.0081	4.90108e-08	8.57263e-06	50.8224	16.6429	3.0537	HC_cycler	LD
CG4341	8:LN_ITP	0.576242	6.50852	0.0274	7.03717e-08	1.17961e-05	16.4313	2.10122	7.8199	HC_cycler	LD
DIP-delta	8:LN_ITP	0.66946	4.13587	0.0119	7.51098e-08	1.20867e-05	18.7993	4.35482	4.31689	HC_cycler	LD
Tdc2	8:LN_ITP	0.60089	16.1106	0.0108	2.08562e-07	3.10757e-05	3.22137	0.161247	19.9778	HC_cycler	LD
Cad87A	8:LN_ITP	0.719442	14.1098	0.0045	2.51473e-07	3.37225e-05	2.05655	0.190665	10.7862	HC_cycler	LD
HDAC4	8:LN_ITP	0.781332	20.1391	0.0015	2.51473e-07	3.37225e-05	7.06615	1.55755	4.53672	HC_cycler	LD
Pka-C3	8:LN_ITP	0.670457	21.5533	0.0001	2.51473e-07	3.37225e-05	2.70633	0.207693	13.0304	HC_cycler	LD
chn	8:LN_ITP	0.768596	4.31184	0.0038	3.22041e-07	4.17926e-05	6.8626	1.92918	3.55725	HC_cycler	LD
cry	8:LN_ITP	0.604008	4.14638	0.0106	3.75252e-07	4.71762e-05	4.17112	0.853743	4.88569	HC_cycler	LD
[truncated: 244 more rows]

## Sheet: DD condition
Gene	cluster	F24.score	phase.F24	F24.p.value	JTK_pvalue	JTK_BH.Q	MAX	MIN	Max.Min	cycling.	Condition
CNMa	1:DN1p_CNMa	0.941396	15.4612	0.0001	4.25348e-48	1.94724e-44	169.812	8.20951	20.6848	HC_cycler	DD
Argk	1:DN1p_CNMa	0.909872	1.41822	0.0004	2.56085e-35	5.86179e-32	23.6031	1.72612	13.6741	HC_cycler	DD
Pdp1	1:DN1p_CNMa	0.955481	15.7442	0.0001	3.0506e-33	4.65522e-30	111.743	22.3991	4.98873	HC_cycler	DD
tim	1:DN1p_CNMa	0.84641	15.4363	0.0001	1.16385e-32	1.33203e-29	32.7674	1.3334	24.5744	HC_cycler	DD
Dh31	1:DN1p_CNMa	0.88758	3.99881	0.0002	1.44099e-29	1.31937e-26	68.1025	6.22878	10.9335	HC_cycler	DD
CG43902	1:DN1p_CNMa	0.800853	1.85278	0.0032	1.77848e-24	1.35698e-21	23.4597	2.00405	11.7061	HC_cycler	DD
SK	1:DN1p_CNMa	0.8927	12.6017	0.0004	2.19202e-24	1.43358e-21	30.2405	6.09602	4.96071	HC_cycler	DD
vri	1:DN1p_CNMa	0.882028	13.5925	0.0001	3.11912e-24	1.78492e-21	10.5804	0.876457	12.0718	HC_cycler	DD
A2bp1	1:DN1p_CNMa	0.905331	13.4807	0.0001	1.49559e-23	7.60758e-21	16.2831	2.68835	6.05691	HC_cycler	DD
CG10289	1:DN1p_CNMa	0.556067	7.48676	0.0363	2.2775e-22	1.04264e-19	77.9375	9.15206	8.51584	HC_cycler	DD
CG6959	1:DN1p_CNMa	0.922287	16.7225	0.0001	3.00989e-21	1.25266e-18	3.82299	0.0720833	53.0358	HC_cycler	DD
CG6329	1:DN1p_CNMa	0.741049	20.8258	0.0005	3.96812e-21	1.51384e-18	28.64	7.15494	4.00284	HC_cycler	DD
CG13054	1:DN1p_CNMa	0.778238	11.1072	0.0023	9.16132e-21	3.22619e-18	15.3094	0.993092	15.4159	HC_cycler	DD
CG43729	1:DN1p_CNMa	0.797651	13.0763	0.0007	2.81763e-20	9.21365e-18	19.9101	4.36903	4.5571	HC_cycler	DD
CG30089	1:DN1p_CNMa	0.884773	7.15177	0.0001	1.94692e-19	5.94201e-17	5.98368	0.256273	23.3488	HC_cycler	DD
Hipk	1:DN1p_CNMa	0.795916	17.9456	0.0007	2.89151e-18	8.27334e-16	19.9571	4.7512	4.20044	HC_cycler	DD
Ggamma30A	1:DN1p_CNMa	0.864799	6.23377	0.0007	4.45566e-18	1.19988e-15	12.2729	2.91229	4.21419	HC_cycler	DD
cpx	1:DN1p_CNMa	0.756381	19.7347	0.0022	6.3319e-18	1.61041e-15	38.6996	17.0686	2.2673	HC_cycler	DD
CG5071	1:DN1p_CNMa	0.789102	6.21405	0.003	1.04849e-17	2.5263e-15	5.38262	0.234207	22.9823	HC_cycler	DD
sky	1:DN1p_CNMa	0.87062	2.15875	0.0001	4.58659e-17	1.04987e-14	11.1789	1.64926	6.77813	HC_cycler	DD
Ant2	1:DN1p_CNMa	0.809665	23.002	0.0001	6.4331e-17	1.40241e-14	34.0503	12.6084	2.70059	HC_cycler	DD
nrv3	1:DN1p_CNMa	0.643986	20.4475	0.0147	1.35533e-16	2.82032e-14	60.5333	28.8496	2.09824	HC_cycler	DD
nrv1	1:DN1p_CNMa	0.781085	19.5579	0.0003	4.37963e-16	8.71736e-14	6.75844	0.399263	16.9273	HC_cycler	DD
CG32052	1:DN1p_CNMa	0.653863	20.8998	0.0074	6.21346e-16	1.18522e-13	10.4614	1.01746	10.2819	HC_cycler	DD
CG44247	1:DN1p_CNMa	0.718324	20.6806	0.0011	7.00625e-16	1.28298e-13	15.7899	2.54811	6.1967	HC_cycler	DD
CG15628	1:DN1p_CNMa	0.837224	12.3694	0.0006	8.79512e-16	1.54577e-13	8.23588	1.80014	4.57514	HC_cycler	DD
CG3530	1:DN1p_CNMa	0.733651	2.14856	0.007	1.1989e-15	1.89261e-13	8.86083	0.965667	9.17587	HC_cycler	DD
Glut1	1:DN1p_CNMa	0.81626	8.00646	0.0011	1.35e-15	2.0601e-13	6.60519	0.876802	7.53328	HC_cycler	DD
Clk	1:DN1p_CNMa	0.765221	1.89577	0.0061	1.6315e-15	2.40935e-13	5.2028	0.382487	13.6025	HC_cycler	DD
Trpm	1:DN1p_CNMa	0.86678	15.5157	0.0001	2.35067e-15	3.36293e-13	7.32788	1.31232	5.58394	HC_cycler	DD
Rgk3	1:DN1p_CNMa	0.669818	20.0196	0.0098	2.58193e-15	3.58185e-13	4.80158	0.230724	20.8109	HC_cycler	DD
CG31324	1:DN1p_CNMa	0.713953	13.7336	0.0001	3.88511e-15	5.23119e-13	4.31806	0.103454	41.7391	HC_cycler	DD
svr	1:DN1p_CNMa	0.842567	3.06063	0.0011	7.77344e-15	1.01677e-12	12.419	2.28783	5.42831	HC_cycler	DD
unc-13-4A	1:DN1p_CNMa	0.882544	12.8723	0.0002	1.30028e-14	1.60883e-12	7.78569	1.52941	5.09064	HC_cycler	DD
Pdfr	1:DN1p_CNMa	0.640706	19.1808	0.0175	3.09967e-14	3.73428e-12	20.2325	4.63221	4.36779	HC_cycler	DD
CG31224	1:DN1p_CNMa	0.619354	6.93393	0.0133	7.28565e-14	8.55223e-12	9.80594	2.96809	3.30379	HC_cycler	DD
CG14082	1:DN1p_CNMa	0.853323	10.3148	0.0001	7.86824e-14	9.0052e-12	2.20098	0.0207452	106.096	HC_cycler	DD
beat-VI	1:DN1p_CNMa	0.807315	16.7669	0.0008	8.31293e-14	9.2821e-12	5.06379	0.674507	7.5074	HC_cycler	DD
CG45263	1:DN1p_CNMa	0.753256	17.6657	0.0011	9.48184e-14	1.03352e-11	10.5254	2.34855	4.48168	HC_cycler	DD
Pka-C1	1:DN1p_CNMa	0.871016	3.37317	0.0002	1.28718e-13	1.33926e-11	21.2757	5.2604	4.04451	HC_cycler	DD
Hr4	1:DN1p_CNMa	0.637899	7.36495	0.0216	1.61678e-13	1.64481e-11	17.2305	1.33004	12.9549	HC_cycler	DD
aret	1:DN1p_CNMa	0.662553	7.7971	0.0106	3.11752e-13	2.97333e-11	9.92487	1.15839	8.5678	HC_cycler	DD
Eip93F	1:DN1p_CNMa	0.80976	19.8953	0.0012	5.36157e-13	5.00924e-11	18.3221	5.14673	3.55995	HC_cycler	DD
CG1387	1:DN1p_CNMa	0.685616	9.93345	0.008	9.96592e-13	8.94588e-11	1.66058	0.0151061	109.928	HC_cycler	DD
Pu	1:DN1p_CNMa	0.829084	12.9218	0.0008	1.08331e-12	9.53729e-11	6.13366	1.09443	5.60445	HC_cycler	DD
dpr13	1:DN1p_CNMa	0.871553	9.38977	0.0006	1.1294e-12	9.75543e-11	5.98558	1.6604	3.60489	HC_cycler	DD
CG43066	1:DN1p_CNMa	0.650132	20.6508	0.0115	1.20215e-12	1.01915e-10	6.97647	1.69692	4.11124	HC_cycler	DD
Pxn	1:DN1p_CNMa	0.759486	14.113	0.0001	1.70968e-12	1.42307e-10	2.11079	0.1206	17.5024	HC_cycler	DD
His3.3B	1:DN1p_CNMa	0.630135	7.14349	0.0126	2.88532e-12	2.30088e-10	91.4669	42.7884	2.13766	HC_cycler	DD
rut	1:DN1p_CNMa	0.531226	7.15761	0.037	2.91506e-12	2.30088e-10	13.4533	1.41552	9.50416	HC_cycler	DD
CG4341	1:DN1p_CNMa	0.641474	11.0982	0.011	3.16274e-12	2.45407e-10	5.45872	1.26105	4.32869	HC_cycler	DD
CG11030	1:DN1p_CNMa	0.842095	15.9405	0.0002	4.33201e-12	3.30532e-10	3.68231	0.392186	9.38921	HC_cycler	DD
CG14424	1:DN1p_CNMa	0.732526	7.13813	0.0003	4.69679e-12	3.5249e-10	3.21991	0.0776334	41.4758	HC_cycler	DD
Proc	1:DN1p_CNMa	0.706439	4.65829	0.001	5.09156e-12	3.75954e-10	5.58604	0.104742	53.3314	HC_cycler	DD
IA-2	1:DN1p_CNMa	0.750232	19.8678	0.0007	5.86191e-12	4.25966e-10	184.181	109.39	1.68372	HC_cycler	DD
CG11190	1:DN1p_CNMa	0.675277	8.52707	0.0068	7.91623e-12	5.54633e-10	7.6509	0.726066	10.5375	HC_cycler	DD
Pkc53E	1:DN1p_CNMa	0.894624	16.8813	0.0001	7.99602e-12	5.54633e-10	5.02411	1.17782	4.26562	HC_cycler	DD
ctp	1:DN1p_CNMa	0.701445	8.63979	0.0008	8.74618e-12	5.88823e-10	47.8913	25.6844	1.86461	HC_cycler	DD
nmo	1:DN1p_CNMa	0.67894	21.704	0.0035	1.17799e-11	7.8157e-10	26.5729	5.5209	4.81314	HC_cycler	DD
TrissinR	1:DN1p_CNMa	0.733454	18.6746	0.0001	1.50755e-11	9.7205e-10	2.06703	0.0418734	49.3639	HC_cycler	DD
Dop1R1	1:DN1p_CNMa	0.681642	11.8364	0.007	1.92648e-11	1.22492e-09	9.21695	0.974316	9.45991	HC_cycler	DD
CG10384	1:DN1p_CNMa	0.781143	12.2775	0.0013	4.18423e-11	2.52045e-09	13.8624	2.74054	5.05826	HC_cycler	DD
CG43373	1:DN1p_CNMa	0.716128	15.6484	0.0042	4.1444e-11	2.52045e-09	1.95966	0.240946	8.13319	HC_cycler	DD
Ppcs	1:DN1p_CNMa	0.735265	10.5618	0.0052	5.11749e-11	3.00357e-09	5.63215	1.42836	3.9431	HC_cycler	DD
mgl	1:DN1p_CNMa	0.721379	4.87111	0.0066	6.81126e-11	3.94708e-09	17.3528	4.67724	3.71005	HC_cycler	DD
gogo	1:DN1p_CNMa	0.882559	3.03159	0.0001	7.41814e-11	4.24503e-09	2.83871	0.04914	57.7677	HC_cycler	DD
CG34384	1:DN1p_CNMa	0.720656	11.1014	0.0066	7.63237e-11	4.24963e-09	13.2729	3.79162	3.50058	HC_cycler	DD
hoe1	1:DN1p_CNMa	0.700307	10.9299	0.0024	7.70467e-11	4.24963e-09	2.24269	0.360894	6.21425	HC_cycler	DD
Nos	1:DN1p_CNMa	0.65597	16.2855	0.0075	7.56008e-11	4.24963e-09	3.39837	0.58902	5.76954	HC_cycler	DD
nAChRalpha6	1:DN1p_CNMa	0.54066	8.9681	0.0342	8.71286e-11	4.69264e-09	9.15381	3.98287	2.2983	HC_cycler	DD
Drat	1:DN1p_CNMa	0.808211	15.3687	0.0006	1.26895e-10	6.75493e-09	5.24968	1.42347	3.68795	HC_cycler	DD
bun	1:DN1p_CNMa	0.598401	20.8276	0.0179	1.40627e-10	7.39988e-09	42.1173	14.135	2.97964	HC_cycler	DD
Dat	1:DN1p_CNMa	0.76248	7.56282	0.0072	1.77472e-10	9.23258e-09	1.38365	0.0410015	33.7463	HC_cycler	DD
Dif	1:DN1p_CNMa	0.584424	4.42462	0.0135	2.52123e-10	1.29688e-08	1.96747	0.0446086	44.1053	HC_cycler	DD
fs(1)h	1:DN1p_CNMa	0.733615	5.3681	0.0071	3.20021e-10	1.60995e-08	11.1152	4.87659	2.27931	HC_cycler	DD
CG34155	1:DN1p_CNMa	0.598139	6.31163	0.0067	3.25927e-10	1.62184e-08	2.47234	0.165799	14.9117	HC_cycler	DD
Nlg2	1:DN1p_CNMa	0.881884	14.211	0.0005	3.87578e-10	1.90788e-08	3.77412	0.801541	4.70859	HC_cycler	DD
Spn	1:DN1p_CNMa	0.757266	19.1435	0.0004	4.4015e-10	2.12106e-08	7.07745	2.21681	3.19263	HC_cycler	DD
CG14215	1:DN1p_CNMa	0.535405	9.82796	0.0217	7.16153e-10	3.31166e-08	1.32533	0	1.66	HC_cycler	DD
fne	1:DN1p_CNMa	0.765851	2.78314	0.0004	9.8736e-10	4.51548e-08	41.4428	19.4606	2.12958	HC_cycler	DD
nAChRalpha5	1:DN1p_CNMa	0.712279	4.41981	0.0012	1.06949e-09	4.80012e-08	8.32827	2.48222	3.35517	HC_cycler	DD
Lac	1:DN1p_CNMa	0.802941	3.83901	0.0007	1.19986e-09	5.23141e-08	4.09197	0.860107	4.75751	HC_cycler	DD
CG14408	1:DN1p_CNMa	0.548225	8.25889	0.0232	1.23214e-09	5.32143e-08	5.29335	1.10478	4.7913	HC_cycler	DD
tey	1:DN1p_CNMa	0.728831	7.25817	0.0053	1.82949e-09	7.614e-08	4.50352	0.343888	13.0959	HC_cycler	DD
FBgn0284248	1:DN1p_CNMa	0.71714	1.02482	0.0052	2.31467e-09	9.54646e-08	7.38862	2.52337	2.92808	HC_cycler	DD
pdm3	1:DN1p_CNMa	0.669269	12.2337	0.0013	2.75254e-09	1.11514e-07	23.8597	5.80746	4.10846	HC_cycler	DD
Sytbeta	1:DN1p_CNMa	0.765595	4.46195	0.0009	3.59455e-09	1.40648e-07	3.28768	0.609591	5.39325	HC_cycler	DD
CG34347	1:DN1p_CNMa	0.702485	7.86193	0.0092	4.0181e-09	1.55889e-07	2.31604	0.351797	6.58346	HC_cycler	DD
CG9813	1:DN1p_CNMa	0.760572	20.8367	0.0026	4.60615e-09	1.77201e-07	3.34795	0.66554	5.03043	HC_cycler	DD
Scp2	1:DN1p_CNMa	0.525934	14.0019	0.0002	5.3223e-09	1.99717e-07	7.20433	0.0842314	85.5302	HC_cycler	DD
Xport-B	1:DN1p_CNMa	0.86405	11.9832	0.0006	6.25139e-09	2.27134e-07	2.46172	0.601666	4.09151	HC_cycler	DD
2mit	1:DN1p_CNMa	0.791525	15.7956	0.0013	7.58764e-09	2.71377e-07	3.60997	0.582562	6.19672	HC_cycler	DD
hth	1:DN1p_CNMa	0.544889	7.85872	0.0402	8.39122e-09	2.97791e-07	11.8344	4.84043	2.44491	HC_cycler	DD
blw	1:DN1p_CNMa	0.719964	19.9698	0.0068	8.60498e-09	3.00715e-07	10.1463	4.67944	2.16828	HC_cycler	DD
CG5890	1:DN1p_CNMa	0.729329	19.5421	0.0045	8.67701e-09	3.00935e-07	5.62751	0.971672	5.79157	HC_cycler	DD
CG34356	1:DN1p_CNMa	0.580676	22.5363	0.0285	9.12349e-09	3.1404e-07	12.8952	1.412	9.1326	HC_cycler	DD
CG14411	1:DN1p_CNMa	0.519152	6.8154	0.0474	1.00844e-08	3.41972e-07	2.19445	0.0993709	22.0834	HC_cycler	DD
twit	1:DN1p_CNMa	0.773302	5.89025	0.0058	1.02538e-08	3.45161e-07	1.69424	0.109946	15.4097	HC_cycler	DD
CG44422	1:DN1p_CNMa	0.79471	13.1387	0.0004	1.09596e-08	3.60956e-07	8.34764	3.27681	2.54749	HC_cycler	DD
Sik3	1:DN1p_CNMa	0.853489	14.0043	0.0001	1.10514e-08	3.61381e-07	2.25713	0.253379	8.90814	HC_cycler	DD
Rala	1:DN1p_CNMa	0.526894	10.7919	0.0378	1.17124e-08	3.80279e-07	2.96245	0.672465	4.40536	HC_cycler	DD
Irk1	1:DN1p_CNMa	0.597287	10.2622	0.0083	1.21074e-08	3.90336e-07	1.61453	0.129388	12.4782	HC_cycler	DD
CG8958	1:DN1p_CNMa	0.831723	8.20931	0.0007	1.26198e-08	4.0401e-07	1.02608	0.190101	5.39755	HC_cycler	DD
CG32333	1:DN1p_CNMa	0.616163	10.4954	0.0055	1.30445e-08	4.14706e-07	1.61256	0.165531	9.74171	HC_cycler	DD
CG13298	1:DN1p_CNMa	0.647273	9.1232	0.0158	1.3483e-08	4.25691e-07	10.2108	2.07518	4.92044	HC_cycler	DD
rad	1:DN1p_CNMa	0.693734	14.2821	0.0002	1.40509e-08	4.37584e-07	15.8055	6.85967	2.30412	HC_cycler	DD
CG31808	1:DN1p_CNMa	0.586805	23.8595	0.0272	2.15229e-08	6.39816e-07	7.7225	1.75525	4.39967	HC_cycler	DD
CG4502	1:DN1p_CNMa	0.758505	19.0639	0.004	2.51188e-08	7.32446e-07	5.36723	1.78451	3.00768	HC_cycler	DD
Klp3A	1:DN1p_CNMa	0.564266	7.05643	0.0135	3.35937e-08	9.4351e-07	2.78538	0.0360658	77.2306	HC_cycler	DD
CG13594	1:DN1p_CNMa	0.678859	10.6272	0.0084	3.64027e-08	1.01001e-06	1.91688	0.208849	9.17833	HC_cycler	DD
CG30116	1:DN1p_CNMa	0.703957	6.29085	0.0001	4.07206e-08	1.10964e-06	3.26509	0.335569	9.73002	HC_cycler	DD
hbs	1:DN1p_CNMa	0.758733	5.89252	0.0022	4.20428e-08	1.13889e-06	1.15952	0.0253295	45.7773	HC_cycler	DD
alphaTub84B	1:DN1p_CNMa	0.519361	5.09028	0.0424	5.82295e-08	1.54985e-06	14.2203	5.93692	2.39523	HC_cycler	DD
Tbh	1:DN1p_CNMa	0.716089	19.6418	0.0086	7.72996e-08	1.97697e-06	17.9383	6.11442	2.93377	HC_cycler	DD
HDAC4	1:DN1p_CNMa	0.713105	18.8667	0.0057	7.79098e-08	1.9815e-06	4.6746	1.29824	3.60073	HC_cycler	DD
Pka-R1	1:DN1p_CNMa	0.780359	4.19236	0.0015	1.01567e-07	2.55481e-06	8.67041	2.80866	3.08702	HC_cycler	DD
Vps13	1:DN1p_CNMa	0.749578	7.54481	0.0028	1.06409e-07	2.66196e-06	1.50589	0.192208	7.83467	HC_cycler	DD
esn	1:DN1p_CNMa	0.665375	8.29602	0.0066	1.11472e-07	2.75849e-06	1.56075	0.397576	3.92567	HC_cycler	DD
ChAT	1:DN1p_CNMa	0.636429	8.89721	0.0161	1.27116e-07	3.04678e-06	6.96043	1.81656	3.83166	HC_cycler	DD
Ubqn	1:DN1p_CNMa	0.761634	7.77905	0.002	1.27116e-07	3.04678e-06	4.31806	1.6532	2.61195	HC_cycler	DD
KrT95D	1:DN1p_CNMa	0.561935	8.74951	0.0104	1.38354e-07	3.2818e-06	3.38858	0.622907	5.43995	HC_cycler	DD
CG9932	1:DN1p_CNMa	0.698697	8.58132	0.0145	1.49397e-07	3.50739e-06	3.92546	1.03079	3.80822	HC_cycler	DD
CG9328	1:DN1p_CNMa	0.699956	21.8877	0.0033	1.52869e-07	3.57058e-06	3.66438	0.894771	4.09533	HC_cycler	DD
CG1632	1:DN1p_CNMa	0.752106	7.55109	0.0008	1.56427e-07	3.61679e-06	0.876618	0.0458753	19.1087	HC_cycler	DD
amon	1:DN1p_CNMa	0.555773	2.2302	0.0286	1.7949e-07	4.08808e-06	5.905	2.22294	2.65639	HC_cycler	DD
Rab32	1:DN1p_CNMa	0.700266	12.583	0.0078	1.7949e-07	4.08808e-06	0.869019	0	1.66	HC_cycler	DD
CG32369	1:DN1p_CNMa	0.794608	21.2062	0.0039	1.90765e-07	4.28099e-06	2.27294	0.251629	9.03286	HC_cycler	DD
Mnt	1:DN1p_CNMa	0.671558	13.4469	0.0124	2.05824e-07	4.552e-06	7.63758	2.90691	2.62738	HC_cycler	DD
Rph	1:DN1p_CNMa	0.595381	6.63962	0.0188	2.20349e-07	4.8266e-06	1.38449	0.278932	4.96353	HC_cycler	DD
CG44837	1:DN1p_CNMa	0.568259	17.1914	0.0066	2.37657e-07	5.13206e-06	3.05468	0.719816	4.2437	HC_cycler	DD
ATPsynbeta	1:DN1p_CNMa	0.530199	19.867	0.0437	2.48665e-07	5.31958e-06	7.85764	3.22286	2.4381	HC_cycler	DD
cry	1:DN1p_CNMa	0.708514	1.65531	0.0068	2.62138e-07	5.55588e-06	4.62207	1.2377	3.73442	HC_cycler	DD
dpr8	1:DN1p_CNMa	0.698406	14.3655	0.0091	2.70147e-07	5.67308e-06	6.12011	1.64158	3.72818	HC_cycler	DD
CG34353	1:DN1p_CNMa	0.589948	14.2597	0.0147	2.89032e-07	6.04195e-06	4.65471	0.965226	4.8224	HC_cycler	DD
CG14299	1:DN1p_CNMa	0.530106	7.44138	0.026	3.16216e-07	6.49165e-06	2.56127	0.466126	5.4948	HC_cycler	DD
GluRIB	1:DN1p_CNMa	0.684384	7.5013	0.0075	3.13868e-07	6.49165e-06	1.29269	0.324866	3.97913	HC_cycler	DD
Elf	1:DN1p_CNMa	0.662638	7.31367	0.0166	3.38218e-07	6.91232e-06	2.81673	0.610346	4.61498	HC_cycler	DD
FBgn0284243	1:DN1p_CNMa	0.737859	2.53025	0.006	3.45862e-07	7.03714e-06	5.79819	2.3022	2.51854	HC_cycler	DD
DopEcR	1:DN1p_CNMa	0.732727	19.2623	0.0063	3.86719e-07	7.79912e-06	3.38142	0.686889	4.9228	HC_cycler	DD
CG45057	1:DN1p_CNMa	0.752931	3.38543	0.0016	4.51799e-07	8.99277e-06	2.25975	0.477098	4.73646	HC_cycler	DD
beat-Ia	1:DN1p_CNMa	0.674657	18.104	0.0094	5.00939e-07	9.8849e-06	5.29494	1.83783	2.88109	HC_cycler	DD
wake	1:DN1p_CNMa	0.603863	10.6152	0.0098	5.19721e-07	1.01679e-05	1.68373	0.152737	11.0237	HC_cycler	DD
chn	1:DN1p_CNMa	0.579138	23.1095	0.0321	5.35224e-07	1.04266e-05	6.18774	1.73694	3.56245	HC_cycler	DD
emc	1:DN1p_CNMa	0.520379	11.81	0.01	5.75957e-07	1.11726e-05	10.3215	3.64995	2.82785	HC_cycler	DD
CG2909	1:DN1p_CNMa	0.727624	9.10081	0.0024	7.16905e-07	1.3675e-05	1.77656	0.240431	7.38906	HC_cycler	DD
Mid1	1:DN1p_CNMa	0.6459	12.1846	0.0149	7.11694e-07	1.3675e-05	9.80369	4.33128	2.26346	HC_cycler	DD
dysc	1:DN1p_CNMa	0.816727	18.62	0.0013	1.07388e-06	1.97439e-05	16.3908	8.43094	1.94412	HC_cycler	DD
CG42747	1:DN1p_CNMa	0.518202	8.06642	0.0283	1.20401e-06	2.19599e-05	2.45403	0.106959	22.9436	HC_cycler	DD
sfl	1:DN1p_CNMa	0.631963	6.14415	0.0184	1.43818e-06	2.59213e-05	2.16971	0.514368	4.2182	HC_cycler	DD
CG2186	1:DN1p_CNMa	0.577339	15.2016	0.0304	1.63336e-06	2.89826e-05	2.09584	0.327118	6.40697	HC_cycler	DD
shep	1:DN1p_CNMa	0.728614	1.71746	0.0006	1.68007e-06	2.96964e-05	30.5152	14.7383	2.07046	HC_cycler	DD
CG1648	1:DN1p_CNMa	0.808072	5.4341	0.0003	1.74031e-06	3.05254e-05	2.21553	0.529032	4.18789	HC_cycler	DD
VepD	1:DN1p_CNMa	0.608115	12.9518	0.0163	1.90666e-06	3.30633e-05	1.83824	0.330731	5.55812	HC_cycler	DD
cno	1:DN1p_CNMa	0.615578	11.0903	0.022	2.01656e-06	3.4706e-05	1.04128	0.224691	4.63427	HC_cycler	DD
CG31760	1:DN1p_CNMa	0.628331	10.202	0.0153	2.08836e-06	3.57893e-05	4.04593	1.54189	2.624	HC_cycler	DD
Dop1R2	1:DN1p_CNMa	0.586218	19.768	0.0079	2.10295e-06	3.57893e-05	2.82306	0.203272	13.8881	HC_cycler	DD
slgA	1:DN1p_CNMa	0.929274	4.58939	0.0001	2.3511e-06	3.9571e-05	7.46668	4.27719	1.7457	HC_cycler	DD
phol	1:DN1p_CNMa	0.577078	7.08905	0.0234	2.45122e-06	4.09551e-05	1.40934	0.137285	10.2658	HC_cycler	DD
CG17778	1:DN1p_CNMa	0.736129	0.719647	0.0007	2.73868e-06	4.50995e-05	1.89615	0.089264	21.242	HC_cycler	DD
Pfk	1:DN1p_CNMa	0.675656	17.8624	0.0009	2.81545e-06	4.61976e-05	2.33	0.262178	8.88708	HC_cycler	DD
Tet	1:DN1p_CNMa	0.541384	11.8347	0.0373	2.83503e-06	4.63528e-05	5.79832	2.93052	1.9786	HC_cycler	DD
ATPsynC	1:DN1p_CNMa	0.681004	23.1469	0.0049	2.9959e-06	4.82931e-05	9.12968	4.98331	1.83205	HC_cycler	DD
dpr12	1:DN1p_CNMa	0.540997	18.8159	0.0208	3.20935e-06	5.10153e-05	6.35622	2.27668	2.79187	HC_cycler	DD
CG5549	1:DN1p_CNMa	0.793722	4.7021	0.0009	3.68093e-06	5.75129e-05	2.86728	0.492487	5.82205	HC_cycler	DD
CG14883	1:DN1p_CNMa	0.592328	9.68123	0.0162	4.19e-06	6.48034e-05	4.18357	1.6505	2.53472	HC_cycler	DD
HmgZ	1:DN1p_CNMa	0.556647	15.0422	0.0251	4.39421e-06	6.75056e-05	9.44996	4.04732	2.33487	HC_cycler	DD
nvy	1:DN1p_CNMa	0.583377	9.356	0.0187	4.63917e-06	7.07938e-05	0.800025	0.0891917	8.96973	HC_cycler	DD
CG13203	1:DN1p_CNMa	0.810082	10.1619	0.0002	4.70243e-06	7.10487e-05	2.12874	0.407017	5.2301	HC_cycler	DD
Unc-76	1:DN1p_CNMa	0.575428	21.1959	0.026	4.70243e-06	7.10487e-05	4.0653	0.869998	4.67277	HC_cycler	DD
CG18549	1:DN1p_CNMa	0.733521	1.02124	0.0013	4.86412e-06	7.30097e-05	3.24734	0.432673	7.5053	HC_cycler	DD
Ald	1:DN1p_CNMa	0.684114	1.32135	0.0043	4.93032e-06	7.37615e-05	6.69254	2.82127	2.37217	HC_cycler	DD
Hsp23	1:DN1p_CNMa	0.666148	22.4585	0.0076	4.96386e-06	7.40213e-05	11.4729	3.66482	3.13056	HC_cycler	DD
inaC	1:DN1p_CNMa	0.69626	23.6797	0.0097	6.19719e-06	9.03527e-05	1.76728	0.111359	15.87	HC_cycler	DD
Ppa	1:DN1p_CNMa	0.63864	5.51049	0.0003	6.23895e-06	9.06727e-05	3.18055	0.086353	36.832	HC_cycler	DD
CG31183	1:DN1p_CNMa	0.763366	14.3441	0.0001	7.17747e-06	0.000102363	1.28556	0	1.66	HC_cycler	DD
Cad87A	1:DN1p_CNMa	0.732576	4.2362	0.0011	7.72192e-06	0.000109786	1.10407	0.0469162	23.5328	HC_cycler	DD
nord	1:DN1p_CNMa	0.631812	12.3522	0.0068	7.77315e-06	0.000110172	2.56257	0.730099	3.5099	HC_cycler	DD
CG4467	1:DN1p_CNMa	0.804044	15.4908	0.0017	7.82504e-06	0.000110225	5.04088	1.54725	3.25797	HC_cycler	DD
b6	1:DN1p_CNMa	0.573198	8.22202	0.0159	8.08849e-06	0.000113239	0.820743	0.0569698	14.4066	HC_cycler	DD
nAChRalpha1	1:DN1p_CNMa	0.648428	8.72544	0.0145	8.41606e-06	0.000117109	2.57855	1.07021	2.40939	HC_cycler	DD
sha	1:DN1p_CNMa	0.509198	10.622	0.0368	8.58476e-06	0.000118734	1.11478	0	1.66	HC_cycler	DD
Ddc	1:DN1p_CNMa	0.689184	6.35718	0.0008	8.93156e-06	0.000121693	2.49886	0.398558	6.26976	HC_cycler	DD
fax	1:DN1p_CNMa	0.749039	14.5693	0.0013	9.35294e-06	0.00012668	27.7438	17.2149	1.61162	HC_cycler	DD
NaPi-III	1:DN1p_CNMa	0.595743	10.6155	0.0204	9.92322e-06	0.000133221	4.09215	1.64333	2.49016	HC_cycler	DD
grp	1:DN1p_CNMa	0.678994	18.6006	0.0107	1.0254e-05	0.000136461	1.6846	0.30866	5.45777	HC_cycler	DD
CG44838	1:DN1p_CNMa	0.669749	5.44375	0.0005	1.03893e-05	0.000137861	3.37377	0.562666	5.99604	HC_cycler	DD
CG11317	1:DN1p_CNMa	0.678828	6.29569	0.0049	1.09478e-05	0.000144021	2.96577	0.716306	4.14036	HC_cycler	DD
CG32082	1:DN1p_CNMa	0.819142	3.89829	0.0002	1.13116e-05	0.00014838	1.92063	0.244316	7.86124	HC_cycler	DD
msn	1:DN1p_CNMa	0.769801	18.1782	0.0047	1.14603e-05	0.000149474	5.57919	2.30604	2.41938	HC_cycler	DD
jeb	1:DN1p_CNMa	0.793401	23.1384	0.0021	1.24728e-05	0.000160847	7.83008	2.6065	3.00406	HC_cycler	DD
CG34393	1:DN1p_CNMa	0.704701	17.8913	0.0019	1.39274e-05	0.00017711	1.22776	0.0189148	64.9098	HC_cycler	DD
ATPsynE	1:DN1p_CNMa	0.794862	19.1815	0.002	1.43848e-05	0.000181916	2.04449	0.453546	4.50779	HC_cycler	DD
Moe	1:DN1p_CNMa	0.570965	7.78215	0.0212	1.52455e-05	0.000191216	5.63778	2.53211	2.22652	HC_cycler	DD
Idh	1:DN1p_CNMa	0.723447	15.6102	0.0034	1.54433e-05	0.000192118	3.21117	1.05424	3.04595	HC_cycler	DD
sdt	1:DN1p_CNMa	0.731947	4.93348	0.0036	1.67896e-05	0.000207737	4.54098	2.02884	2.23822	HC_cycler	DD
CG42784	1:DN1p_CNMa	0.742661	7.42323	0.0082	1.71163e-05	0.000211209	10.4705	5.4783	1.91127	HC_cycler	DD
CG7706	1:DN1p_CNMa	0.627521	13.0931	0.0023	1.82485e-05	0.000222778	2.37157	0.298057	7.95675	HC_cycler	DD
Ac76E	1:DN1p_CNMa	0.649288	10.7778	0.0063	1.83652e-05	0.000223606	0.976684	0.0698552	13.9816	HC_cycler	DD
NAA20	1:DN1p_CNMa	0.504633	10.8757	0.0457	1.86015e-05	0.000225883	0.925952	0.127307	7.2734	HC_cycler	DD
CG2658	1:DN1p_CNMa	0.54851	7.42658	0.0265	1.87211e-05	0.000226734	1.04938	0.145612	7.20673	HC_cycler	DD
CG32647	1:DN1p_CNMa	0.613461	12.4985	0.0168	2.11301e-05	0.000252208	1.85556	0.490668	3.7817	HC_cycler	DD
CG42750	1:DN1p_CNMa	0.534012	7.38336	0.0375	2.12652e-05	0.000252208	4.23693	1.7493	2.42207	HC_cycler	DD
CG31705	1:DN1p_CNMa	0.766497	3.6502	0.0001	2.16738e-05	0.00025639	2.29496	0.222792	10.3009	HC_cycler	DD
yps	1:DN1p_CNMa	0.701115	16.5067	0.0051	2.29469e-05	0.000268672	7.27949	2.46655	2.95129	HC_cycler	DD
CR15345	1:DN1p_CNMa	0.651292	6.86356	0.0019	2.32392e-05	0.000271401	2.46181	0.464669	5.298	HC_cycler	DD
Con	1:DN1p_CNMa	0.612426	5.96987	0.0248	2.41378e-05	0.000279047	0.995991	0.263797	3.7756	HC_cycler	DD
Dyrk2	1:DN1p_CNMa	0.589937	21.7954	0.0008	2.68669e-05	0.000305203	6.99237	0.896061	7.80345	HC_cycler	DD
gw	1:DN1p_CNMa	0.713227	10.4906	0.0067	2.78988e-05	0.000314583	7.20213	3.85267	1.86939	HC_cycler	DD
DOR	1:DN1p_CNMa	0.545471	20.1363	0.0168	2.98903e-05	0.00033213	1.67378	0.285838	5.85569	HC_cycler	DD
CG43737	1:DN1p_CNMa	0.691975	17.1416	0.0027	3.18173e-05	0.000348468	5.72577	2.09233	2.73655	HC_cycler	DD
ttv	1:DN1p_CNMa	0.74072	18.3751	0.0021	3.30298e-05	0.000360025	2.41786	0.675892	3.57729	HC_cycler	DD
CG13868	1:DN1p_CNMa	0.677574	11.3602	0.0074	3.49309e-05	0.000377155	3.30284	1.25701	2.62753	HC_cycler	DD
CG14441	1:DN1p_CNMa	0.546766	8.40072	0.0169	3.7398e-05	0.000399086	4.91413	2.09536	2.34525	HC_cycler	DD
CG17528	1:DN1p_CNMa	0.741645	5.64157	0.0046	3.83353e-05	0.000406248	1.2065	0.184673	6.53316	HC_cycler	DD
lilli	1:DN1p_CNMa	0.670655	10.1606	0.0077	4.00291e-05	0.000422243	2.38433	0.996712	2.39219	HC_cycler	DD
fred	1:DN1p_CNMa	0.698256	15.4412	0.0046	4.23137e-05	0.000442265	2.90259	0.944003	3.07477	HC_cycler	DD
msi	1:DN1p_CNMa	0.661196	4.40035	0.0007	4.33681e-05	0.000451226	6.42544	2.06295	3.11468	HC_cycler	DD
tacc	1:DN1p_CNMa	0.584464	5.74258	0.0233	4.41745e-05	0.000458574	3.15645	1.55626	2.02822	HC_cycler	DD
Hug	1:DN1p_CNMa	0.588394	15.218	0.008	4.72593e-05	0.000486187	5.43161	0.150248	36.1508	HC_cycler	DD
CG42339	1:DN1p_CNMa	0.525035	19.8567	0.0265	4.78416e-05	0.000489975	2.14088	0.0452483	47.3141	HC_cycler	DD
Ace	1:DN1p_CNMa	0.60322	7.40829	0.0273	4.90269e-05	0.000500993	4.35979	2.35188	1.85375	HC_cycler	DD
Dscam4	1:DN1p_CNMa	0.681373	15.9681	0.0064	4.96299e-05	0.000506026	7.97772	3.10216	2.57166	HC_cycler	DD
CG43778	1:DN1p_CNMa	0.608551	7.41417	0.0038	5.08573e-05	0.00051283	5.3129	0.716349	7.41663	HC_cycler	DD
CG15465	1:DN1p_CNMa	0.631291	8.21194	0.0167	5.47153e-05	0.000546914	21.8015	14.045	1.55226	HC_cycler	DD
ths	1:DN1p_CNMa	0.786201	13.2267	0.0042	5.53848e-05	0.000551199	1.85722	0.57385	3.23642	HC_cycler	DD
CG44153	1:DN1p_CNMa	0.693327	17.3261	0.0033	5.60621e-05	0.000556729	2.51134	0.788814	3.18369	HC_cycler	DD
htl	1:DN1p_CNMa	0.657035	6.98397	0.0016	5.88509e-05	0.000580646	1.65347	0.00998132	165.657	HC_cycler	DD
CG9674	1:DN1p_CNMa	0.542132	22.7445	0.0377	5.92077e-05	0.000582909	4.05006	1.24425	3.25502	HC_cycler	DD
CG1943	1:DN1p_CNMa	0.534686	7.29843	0.0463	6.02944e-05	0.000592334	3.45365	1.06902	3.23067	HC_cycler	DD
fz	1:DN1p_CNMa	0.610603	8.0636	0.0098	6.48298e-05	0.000630129	0.82813	0.107577	7.69804	HC_cycler	DD
stmA	1:DN1p_CNMa	0.801605	19.6784	0.0017	6.76223e-05	0.000653112	1.23992	0.208172	5.95622	HC_cycler	DD
Cct1	1:DN1p_CNMa	0.610895	11.1083	0.0159	6.84413e-05	0.000658244	4.7123	2.03545	2.31511	HC_cycler	DD
Aac11	1:DN1p_CNMa	0.652231	5.88886	0.0125	7.67081e-05	0.000721088	4.48443	2.36284	1.8979	HC_cycler	DD
Mkp3	1:DN1p_CNMa	0.530684	21.1907	0.0064	7.95098e-05	0.000742849	7.57202	1.42575	5.3109	HC_cycler	DD
CG32547	1:DN1p_CNMa	0.618565	16.5028	0.0116	8.24086e-05	0.000763697	4.87326	1.67113	2.91615	HC_cycler	DD
Acon	1:DN1p_CNMa	0.51095	20.4507	0.0269	8.29e-05	0.000766699	2.97143	0.81029	3.66712	HC_cycler	DD
CG12535	1:DN1p_CNMa	0.623913	6.01512	0.0059	8.3397e-05	0.000769741	1.9987	0.371906	5.37421	HC_cycler	DD
spen	1:DN1p_CNMa	0.752026	16.0411	0.001	8.43966e-05	0.0007774	11.715	5.73565	2.04249	HC_cycler	DD
LpR1	1:DN1p_CNMa	0.592757	11.6978	0.0217	8.90362e-05	0.000808746	1.6591	0.237685	6.98023	HC_cycler	DD
CG13760	1:DN1p_CNMa	0.684096	10.8625	0.0071	8.95681e-05	0.000811966	2.02782	0.559684	3.62316	HC_cycler	DD
CG30377	1:DN1p_CNMa	0.582711	6.13593	0.0212	9.73162e-05	0.000873556	0.824556	0.0606127	13.6037	HC_cycler	DD
Syp	1:DN1p_CNMa	0.642258	12.0764	0.0083	0.000102627	0.000915843	6.97171	3.43183	2.03149	HC_cycler	DD
wds	1:DN1p_CNMa	0.582311	6.12762	0.0244	0.00010446	0.000924988	1.32017	0.203952	6.47296	HC_cycler	DD
scrib	1:DN1p_CNMa	0.65779	4.99178	0.0102	0.000105076	0.000928643	5.44034	1.13231	4.80464	HC_cycler	DD
Appl	1:DN1p_CNMa	0.585313	13.5416	0.0203	0.000108853	0.000956485	26.7905	15.4735	1.73138	HC_cycler	DD
pyd	1:DN1p_CNMa	0.606298	13.5665	0.0026	0.000108853	0.000956485	1.24737	0.0268944	46.3803	HC_cycler	DD
CG32767	1:DN1p_CNMa	0.568293	10.7555	0.0286	0.000110791	0.000971652	8.90046	5.19348	1.71378	HC_cycler	DD
S6KL	1:DN1p_CNMa	0.692814	7.18211	0.0043	0.0001121	0.000979381	1.33302	0.290959	4.58147	HC_cycler	DD
CG7192	1:DN1p_CNMa	0.618964	9.43673	0.0174	0.000114763	0.000995047	1.07364	0.219093	4.90041	HC_cycler	DD
CG8177	1:DN1p_CNMa	0.517465	7.6767	0.0292	0.000129753	0.00111238	4.82431	1.39441	3.45974	HC_cycler	DD
tna	1:DN1p_CNMa	0.760301	21.7086	0.0013	0.000131274	0.00112331	4.75715	2.02337	2.3511	HC_cycler	DD
UQCR-C1	1:DN1p_CNMa	0.691115	17.814	0.0088	0.000132812	0.00113435	2.44138	0.920455	2.65237	HC_cycler	DD
schlank	1:DN1p_CNMa	0.735599	14.2576	0.0078	0.000133589	0.00113675	1.69169	0.256623	6.59212	HC_cycler	DD
CG32809	1:DN1p_CNMa	0.510449	8.47372	0.0489	0.000135153	0.00114792	2.3664	1.19414	1.98168	HC_cycler	DD
ATP8B	1:DN1p_CNMa	0.667771	4.69194	0.0093	0.000135939	0.00115033	1.15592	0.189369	6.10405	HC_cycler	DD
Fife	1:DN1p_CNMa	0.627619	5.06995	0.0107	0.000135939	0.00115033	4.0315	1.48476	2.71526	HC_cycler	DD
eIF3ga	1:DN1p_CNMa	0.638537	6.57921	0.0169	0.000149159	0.00124381	1.9202	0.583747	3.28944	HC_cycler	DD
RpL14	1:DN1p_CNMa	0.538612	5.23509	0.011	0.000155321	0.00128582	9.10638	5.09009	1.78904	HC_cycler	DD
ttm50	1:DN1p_CNMa	0.528136	3.17399	0.012	0.000157124	0.00129373	1.6596	0.120785	13.7401	HC_cycler	DD
CG42450	1:DN1p_CNMa	0.546146	20.5742	0.032	0.000163592	0.00133976	8.17191	4.55249	1.79504	HC_cycler	DD
hiw	1:DN1p_CNMa	0.701871	10.8495	0.0021	0.000164539	0.00134511	4.47248	2.26746	1.97246	HC_cycler	DD
CG32549	1:DN1p_CNMa	0.672628	17.3349	0.0095	0.000195406	0.00155577	5.39601	1.23498	4.3693	HC_cycler	DD
sgg	1:DN1p_CNMa	0.643754	3.1042	0.0004	0.000203356	0.00160235	35.086	18.4325	1.90349	HC_cycler	DD
Atpalpha	1:DN1p_CNMa	0.538017	0.642887	0.0217	0.000205684	0.00161513	69.7426	46.1884	1.50996	HC_cycler	DD
CG12237	1:DN1p_CNMa	0.527476	8.31614	0.0236	0.000238337	0.00184933	2.25781	1.05522	2.13966	HC_cycler	DD
Sox21b	1:DN1p_CNMa	0.647122	4.44088	0.0153	0.000252156	0.00194338	3.46663	1.50252	2.30721	HC_cycler	DD
beat-Vb	1:DN1p_CNMa	0.610701	10.6189	0.008	0.000266729	0.00202838	1.55007	0.620103	2.49971	HC_cycler	DD
Vha36-1	1:DN1p_CNMa	0.500963	11.3	0.038	0.000290095	0.00217002	10.5638	4.91941	2.14738	HC_cycler	DD
Pde6	1:DN1p_CNMa	0.594791	19.3876	0.0227	0.000303332	0.00225431	2.41788	0.868349	2.78446	HC_cycler	DD
CG6330	1:DN1p_CNMa	0.539968	21.1362	0.0399	0.000346551	0.00255066	1.74153	0.340781	5.11041	HC_cycler	DD
bves	1:DN1p_CNMa	0.702156	13.8321	0.004	0.00037028	0.00268644	2.38381	0.394294	6.04576	HC_cycler	DD
Lerp	1:DN1p_CNMa	0.55886	9.20431	0.0329	0.000376442	0.00272682	1.97978	0.440668	4.49267	HC_cycler	DD
cic	1:DN1p_CNMa	0.848158	4.18479	0.0003	0.000399901	0.00287853	4.79405	1.69205	2.83328	HC_cycler	DD
CG4829	1:DN1p_CNMa	0.795106	7.7137	0.0013	0.000424722	0.00303809	0.954999	0.0121862	78.3671	HC_cycler	DD
CG14304	1:DN1p_CNMa	0.578452	8.6102	0.027	0.000446114	0.00317622	5.0307	2.1264	2.36583	HC_cycler	DD
Plc21C	1:DN1p_CNMa	0.824209	17.3762	0.0044	0.000545157	0.00378714	3.07078	0.885601	3.46745	HC_cycler	DD
CG5522	1:DN1p_CNMa	0.638662	18.7452	0.006	0.000594108	0.00407159	1.90067	0.547604	3.47088	HC_cycler	DD
CG1444	1:DN1p_CNMa	0.617708	7.20286	0.0074	0.000633504	0.00430933	2.17774	0.84249	2.58488	HC_cycler	DD
per	1:DN1p_CNMa	0.659304	14.4791	0.001	0.000643738	0.00436598	2.25001	0.667343	3.3716	HC_cycler	DD
alt	1:DN1p_CNMa	0.690028	16.0068	0.0098	0.000654111	0.00441669	1.37667	0.357298	3.85299	HC_cycler	DD
cwo	1:DN1p_CNMa	0.613963	15.1138	0.0117	0.000678958	0.00453762	3.12023	1.2106	2.57743	HC_cycler	DD
Hers	1:DN1p_CNMa	0.706005	8.52121	0.0046	0.000708429	0.00471394	4.83576	2.2764	2.1243	HC_cycler	DD
Sytalpha	1:DN1p_CNMa	0.525422	6.57275	0.0057	0.000731317	0.00485917	5.51031	1.03192	5.33989	HC_cycler	DD
ytr	1:DN1p_CNMa	0.73512	11.638	0.0022	0.000865585	0.00566903	2.40983	0.704586	3.4202	HC_cycler	DD
CG34136	1:DN1p_CNMa	0.831655	3.63772	0.0001	0.000879283	0.00573413	1.7188	0.155483	11.0546	HC_cycler	DD
l(1)G0289	1:DN1p_CNMa	0.573164	7.75151	0.0309	0.000893207	0.00581664	2.68619	1.43891	1.86682	HC_cycler	DD
beat-Vc	1:DN1p_CNMa	0.516696	11.3939	0.0399	0.000897878	0.00583048	1.23714	0.54168	2.2839	HC_cycler	DD
CG2841	1:DN1p_CNMa	0.547336	11.9957	0.0398	0.000897878	0.00583048	0.846789	0.209652	4.03901	HC_cycler	DD
hook	1:DN1p_CNMa	0.594881	15.4623	0.0121	0.000941088	0.00610241	1.22954	0.268724	4.57547	HC_cycler	DD
Vha26	1:DN1p_CNMa	0.57657	18.5085	0.0239	0.000955903	0.00617225	6.72732	3.77363	1.78272	HC_cycler	DD
CG11486	1:DN1p_CNMa	0.65657	21.084	0.0146	0.000981116	0.00630835	7.83326	4.60227	1.70204	HC_cycler	DD
PyK	1:DN1p_CNMa	0.731806	22.2503	0.0019	0.00103875	0.00663237	3.17715	1.52679	2.08094	HC_cycler	DD
CG31688	1:DN1p_CNMa	0.548774	6.98004	0.0328	0.00106601	0.00676863	3.54017	1.36078	2.60157	HC_cycler	DD
arm	1:DN1p_CNMa	0.523197	16.5939	0.0324	0.00111099	0.00700566	4.65501	2.47019	1.88447	HC_cycler	DD
CG14509	1:DN1p_CNMa	0.56885	5.61599	0.0319	0.00113999	0.00712958	5.85776	2.46984	2.37171	HC_cycler	DD
NPF	1:DN1p_CNMa	0.555162	4.16462	0.0114	0.00118181	0.007341	4.85018	0.0260845	185.941	HC_cycler	DD
CG33995	1:DN1p_CNMa	0.518508	9.12842	0.0354	0.00118788	0.00736873	1.44925	0.442567	3.27466	HC_cycler	DD
CG42402	1:DN1p_CNMa	0.532596	14.0927	0.0365	0.00122503	0.00757866	3.51451	0.891845	3.94072	HC_cycler	DD
cv-2	1:DN1p_CNMa	0.578807	2.52315	0.0002	0.00133631	0.00818959	2.22413	0.0184097	120.813	HC_cycler	DD
Tob	1:DN1p_CNMa	0.668721	4.92631	0.0106	0.0014061	0.00857141	7.68591	4.11648	1.86711	HC_cycler	DD
CkIalpha	1:DN1p_CNMa	0.523115	5.34631	0.038	0.00144224	0.00876838	23.3454	14.1991	1.64414	HC_cycler	DD
stai	1:DN1p_CNMa	0.611757	5.37294	0.0124	0.00153261	0.00921981	7.9977	3.54775	2.2543	HC_cycler	DD
CG5525	1:DN1p_CNMa	0.716672	7.31617	0.0012	0.00160384	0.00958536	1.19376	0.215979	5.52722	HC_cycler	DD
sr	1:DN1p_CNMa	0.722003	20.3004	0.0068	0.00160384	0.00958536	3.16405	0.325584	9.71807	HC_cycler	DD
larp	1:DN1p_CNMa	0.519345	15.0277	0.0289	0.00179115	0.0105397	3.73871	1.19243	3.13537	HC_cycler	DD
mspo	1:DN1p_CNMa	0.572926	19.7033	0.0156	0.00183646	0.0107373	1.32144	0.250701	5.27099	HC_cycler	DD
rin	1:DN1p_CNMa	0.531517	11.6328	0.0142	0.00194965	0.0113268	6.10959	3.74353	1.63204	HC_cycler	DD
Mdh2	1:DN1p_CNMa	0.512934	19.1808	0.0385	0.00205912	0.0119324	3.32798	1.5414	2.15906	HC_cycler	DD
CdsA	1:DN1p_CNMa	0.55691	1.92726	0.0242	0.00207962	0.012036	2.39201	0.303913	7.87071	HC_cycler	DD
CG5010	1:DN1p_CNMa	0.579507	18.3651	0.0206	0.00216356	0.0123964	3.2213	1.38776	2.32123	HC_cycler	DD
CG43658	1:DN1p_CNMa	0.52652	23.4192	0.0404	0.00227291	0.0129099	5.89744	2.03826	2.89336	HC_cycler	DD
pum	1:DN1p_CNMa	0.538173	9.0098	0.0358	0.0022841	0.0129574	6.97154	4.18659	1.66521	HC_cycler	DD
CG9005	1:DN1p_CNMa	0.545347	14.7907	0.0325	0.00229539	0.0129893	2.68545	0.651251	4.12353	HC_cycler	DD
Tomosyn	1:DN1p_CNMa	0.557422	12.2994	0.0314	0.00229539	0.0129893	3.8442	1.86093	2.06574	HC_cycler	DD
Pde8	1:DN1p_CNMa	0.61016	4.4006	0.0113	0.00238741	0.0134766	1.19024	0.433594	2.74506	HC_cycler	DD
Es2	1:DN1p_CNMa	0.66011	10.1469	0.0094	0.00247069	0.0138613	0.991698	0.143965	6.88846	HC_cycler	DD
CG45002	1:DN1p_CNMa	0.837132	9.0621	0.0012	0.00261984	0.0146086	4.46433	2.70632	1.6496	HC_cycler	DD
cact	1:DN1p_CNMa	0.578272	5.05317	0.0292	0.00288718	0.0157539	3.36943	1.20289	2.80111	HC_cycler	DD
gukh	1:DN1p_CNMa	0.517563	5.44013	0.0355	0.00295789	0.0160822	1.6561	0.35837	4.62122	HC_cycler	DD
Liprin-alpha	1:DN1p_CNMa	0.535419	5.62889	0.0357	0.00333605	0.0176969	2.54925	0.879272	2.89927	HC_cycler	DD
Deaf1	1:DN1p_CNMa	0.549643	13.4194	0.0034	0.00335211	0.0177615	2.72382	0.796412	3.42011	HC_cycler	DD
GLS	1:DN1p_CNMa	0.511393	5.37968	0.002	0.00361839	0.0190841	1.35301	0.108479	12.4725	HC_cycler	DD
sm	1:DN1p_CNMa	0.73635	0.853355	0.0101	0.00363563	0.019153	21.9535	14.3236	1.53269	HC_cycler	DD
CG4168	1:DN1p_CNMa	0.512887	18.2217	0.036	0.00368796	0.019384	1.02195	0.358311	2.85214	HC_cycler	DD
fwe	1:DN1p_CNMa	0.869836	20.765	0.0007	0.00383084	0.0200889	9.37915	4.3989	2.13216	HC_cycler	DD
Tsp39D	1:DN1p_CNMa	0.647348	5.1786	0.0014	0.00411261	0.0213949	1.49392	0.246877	6.05128	HC_cycler	DD
CG1275	1:DN1p_CNMa	0.806453	3.58599	0.0001	0.00496071	0.0249836	4.31684	1.44474	2.98798	HC_cycler	DD
dally	1:DN1p_CNMa	0.507035	13.5501	0.0077	0.00522085	0.0261214	1.22652	0.129545	9.46789	HC_cycler	DD
CG42795	1:DN1p_CNMa	0.577656	0.230846	0.0141	0.00564764	0.0279512	4.79322	1.76595	2.71424	HC_cycler	DD
CG31637	1:DN1p_CNMa	0.598027	19.2099	0.0092	0.00596809	0.0292213	3.87181	1.8135	2.13499	HC_cycler	DD
klar	1:DN1p_CNMa	0.541441	7.09836	0.0368	0.00624787	0.0303961	1.7283	0.651865	2.65132	HC_cycler	DD
Nhe2	1:DN1p_CNMa	0.760193	21.8746	0.0055	0.00633419	0.0306856	1.89614	0.750388	2.52687	HC_cycler	DD
CG33090	1:DN1p_CNMa	0.526122	5.68595	0.0117	0.00656962	0.0316254	1.60244	0.166868	9.60304	HC_cycler	DD
cpo	1:DN1p_CNMa	0.541984	15.7091	0.0171	0.00662972	0.0318812	7.0483	3.6601	1.92571	HC_cycler	DD
NaCP60E	1:DN1p_CNMa	0.596029	19.2143	0.0163	0.00669034	0.0321052	3.1388	1.06019	2.96061	HC_cycler	DD
FBgn0285947	1:DN1p_CNMa	0.563756	6.30652	0.0344	0.00693792	0.0329479	6.76925	4.29358	1.5766	HC_cycler	DD
CG11768	1:DN1p_CNMa	0.793252	14.3199	0.0002	0.00787245	0.0369263	3.21008	0.841259	3.8158	HC_cycler	DD
trh	1:DN1p_CNMa	0.750675	4.44099	0.0055	0.00819651	0.0378644	2.397	0.021031	113.974	HC_cycler	DD
Trh	1:DN1p_CNMa	0.750675	4.44099	0.0055	0.00819651	0.0378644	0.863145	0.0293556	29.403	HC_cycler	DD
Hsc70-3	1:DN1p_CNMa	0.56838	4.28752	0.0236	0.00872517	0.0399039	8.08324	3.83915	2.10548	HC_cycler	DD
syd	1:DN1p_CNMa	0.708627	14.1164	0.0028	0.00888187	0.0404992	1.38777	0.309677	4.48134	HC_cycler	DD
Pal2	1:DN1p_CNMa	0.574651	1.29213	0.0258	0.00892153	0.0406396	4.3906	1.48799	2.9507	HC_cycler	DD
CenG1A	1:DN1p_CNMa	0.555748	5.28276	0.0151	0.00979089	0.0436443	1.35818	0.268683	5.05496	HC_cycler	DD
Frq2	1:DN1p_CNMa	0.750411	3.49253	0.002	0.00983426	0.0437099	2.78839	1.24906	2.23239	HC_cycler	DD
Gs1l	1:DN1p_CNMa	0.544368	2.26983	0.0412	0.0100532	0.0443815	1.10827	0.1016	10.9082	HC_cycler	DD
Cul3	1:DN1p_CNMa	0.744562	12.524	0.0053	0.0100976	0.0444918	0.852025	0.16806	5.06978	HC_cycler	DD
CR45102	1:DN1p_CNMa	0.544596	15.2262	0.0319	0.0102316	0.0449094	1.68251	0.528516	3.18345	HC_cycler	DD
CG42321	1:DN1p_CNMa	0.506234	11.236	0.0499	0.0107375	0.0468156	1.7753	0.895503	1.98246	HC_cycler	DD
CG10289	12:LNd	0.656111	5.99446	0.015	9.24945e-10	4.2344e-06	75.4238	7.69485	9.80186	HC_cycler	DD
His2Av	12:LNd	0.81452	6.40402	0.0011	1.50495e-08	3.44484e-05	21.0908	1.83521	11.4923	HC_cycler	DD
CG17777	12:LNd	0.681851	23.1043	0.0051	5.76702e-07	0.000752019	20.5327	1.59134	12.9028	HC_cycler	DD
Argk	12:LNd	0.684267	1.67822	0.0094	1.42296e-06	0.00130286	16.6306	2.63058	6.32203	HC_cycler	DD
amon	12:LNd	0.807028	8.60059	0.0023	7.22438e-06	0.00297972	11.7042	3.22715	3.62681	HC_cycler	DD
CG13868	12:LNd	0.653988	11.251	0.0113	7.81054e-06	0.00297972	4.27333	0.514331	8.30852	HC_cycler	DD
CG4577	12:LNd	0.759054	8.95685	0.002	1.4424e-05	0.00445009	22.642	4.92018	4.60187	HC_cycler	DD
rut	12:LNd	0.535318	5.28041	0.0451	1.33731e-05	0.00445009	14.9893	1.54466	9.70396	HC_cycler	DD
CG5347	12:LNd	0.648214	6.0601	0.0198	3.75699e-05	0.00859974	5.11242	0.360571	14.1787	HC_cycler	DD
fne	12:LNd	0.569736	23.0407	0.0301	3.75699e-05	0.00859974	57.2828	27.2478	2.10229	HC_cycler	DD
CG33543	12:LNd	0.756563	1.03981	0.0009	4.33475e-05	0.00944976	9.97201	1.90216	5.24245	HC_cycler	DD
mgl	12:LNd	0.583911	5.07236	0.0261	7.08975e-05	0.0124834	23.0912	5.39018	4.28394	HC_cycler	DD
Tbh	12:LNd	0.777383	21.5747	0.0046	7.08975e-05	0.0124834	22.8172	8.41874	2.71029	HC_cycler	DD
TwdlY	12:LNd	0.690617	8.01356	0.0041	7.59768e-05	0.0128823	4.03434	0	1.66	HC_cycler	DD
nAChRalpha5	12:LNd	0.891121	21.9587	0.0001	8.13981e-05	0.0133086	13.6105	2.63286	5.16946	HC_cycler	DD
Hipk	12:LNd	0.522825	18.4464	0.0395	0.00010695	0.0163205	26.2645	9.73163	2.69888	HC_cycler	DD
CG14439	12:LNd	0.601711	3.96607	0.0047	0.000114428	0.0168984	3.10602	0.0781665	39.7359	HC_cycler	DD
blot	12:LNd	0.710991	17.4471	0.0052	0.000139926	0.0194115	157.941	83.3395	1.89515	HC_cycler	DD
Eip63F-1	12:LNd	0.7267	19.7293	0.0041	0.000170701	0.0217075	3.67865	0.321545	11.4405	HC_cycler	DD
sm	12:LNd	0.637676	22.3883	0.0198	0.000221704	0.0267095	39.7452	14.4271	2.7549	HC_cycler	DD
Pdp1	12:LNd	0.670836	14.2035	0.0106	0.000346874	0.0360907	83.4667	32.0751	2.60223	HC_cycler	DD
CG12535	12:LNd	0.579462	5.17039	0.0273	0.0003933	0.0400117	2.15037	0.36936	5.82189	HC_cycler	DD
CG13300	12:LNd	0.654432	2.313	0.0082	0.000504107	0.0449228	3.59751	0.584761	6.1521	HC_cycler	DD
Rbp6	12:LNd	0.652154	21.4813	0.0126	0.000473953	0.0449228	36.8743	16.7441	2.20222	HC_cycler	DD
ttm50	12:LNd	0.721256	2.62831	0.001	0.000605675	0.0469962	2.12657	0.0692219	30.721	HC_cycler	DD
lgs	14:DN3	0.623265	9.33105	0.0113	5.17781e-06	0.023704	4.90935	0.468815	10.4718	HC_cycler	DD
rst	14:DN3	0.771696	7.16149	0.0033	1.04359e-05	0.0238877	12.3371	0.348475	35.4032	HC_cycler	DD
Pdfr	15:DN1p_CNMa	0.85613	18.0228	0.0011	4.93743e-12	2.26036e-08	19.0301	4.0257	4.72715	HC_cycler	DD
CG45263	15:DN1p_CNMa	0.804506	9.26465	0.0009	9.81646e-11	2.24699e-07	16.1876	2.49228	6.49511	HC_cycler	DD
CG31705	15:DN1p_CNMa	0.721243	22.5317	0.0043	2.78672e-10	4.25254e-07	7.62257	0.697982	10.9209	HC_cycler	DD
CG44247	15:DN1p_CNMa	0.737799	21.5315	0.0023	3.1958e-09	2.4384e-06	22.6478	3.13899	7.215	HC_cycler	DD
GstD1	15:DN1p_CNMa	0.783099	23.6995	0.0015	3.1958e-09	2.4384e-06	3.4202	0.237732	14.3868	HC_cycler	DD
jeb	15:DN1p_CNMa	0.626459	20.4877	0.0148	3.1958e-09	2.4384e-06	19.6711	3.21788	6.11306	HC_cycler	DD
Dop1R1	15:DN1p_CNMa	0.856803	6.84323	0.0001	5.00948e-09	2.86668e-06	10.9218	0.849552	12.856	HC_cycler	DD
shep	15:DN1p_CNMa	0.795999	20.6512	0.0018	4.43203e-09	2.86668e-06	43.7831	16.2144	2.70027	HC_cycler	DD
CG13054	15:DN1p_CNMa	0.768007	6.95761	0.0001	6.37989e-09	3.24524e-06	13.368	0.923063	14.4822	HC_cycler	DD
nAChRalpha6	15:DN1p_CNMa	0.704979	8.03552	0.0042	7.1888e-09	3.29103e-06	16.5075	3.28435	5.02609	HC_cycler	DD
CG34356	15:DN1p_CNMa	0.743446	20.7761	0.0026	1.06908e-08	4.41251e-06	14.5186	2.22909	6.51325	HC_cycler	DD
nrv3	15:DN1p_CNMa	0.72882	20.86	0.0044	1.5811e-08	5.37879e-06	55.1409	29.64	1.86035	HC_cycler	DD
Proc	15:DN1p_CNMa	0.769737	3.60905	0.0015	1.64489e-08	5.37879e-06	28.5281	1.58492	17.9997	HC_cycler	DD
Argk	15:DN1p_CNMa	0.722522	20.6513	0.0063	1.84617e-08	5.63451e-06	29.399	3.6539	8.04592	HC_cycler	DD
fred	15:DN1p_CNMa	0.800896	19.1622	0.0022	2.15381e-08	6.1626e-06	5.85268	0.822492	7.11579	HC_cycler	DD
Clk	15:DN1p_CNMa	0.609713	19.7547	0.0269	4.26399e-08	1.1266e-05	4.99246	0.307232	16.2498	HC_cycler	DD
Tdc2	15:DN1p_CNMa	0.701473	19.8794	0.0046	4.42964e-08	1.1266e-05	3.70715	0.817922	4.5324	HC_cycler	DD
CG17777	15:DN1p_CNMa	0.708245	15.7696	0.0033	5.14252e-08	1.23908e-05	13.1504	0.417464	31.5006	HC_cycler	DD
CG4577	15:DN1p_CNMa	0.786	0.515893	0.0014	6.18574e-08	1.41592e-05	33.599	11.2859	2.97707	HC_cycler	DD
CG42674	15:DN1p_CNMa	0.71523	19.6156	0.0026	8.92727e-08	1.94614e-05	2.97104	0.0329394	90.1971	HC_cycler	DD
svr	15:DN1p_CNMa	0.762971	2.24086	0.0029	1.03235e-07	2.14822e-05	13.3423	2.67682	4.98437	HC_cycler	DD
CG15534	15:DN1p_CNMa	0.759106	1.84854	0.0006	1.23733e-07	2.46282e-05	3.1663	0.0875688	36.1579	HC_cycler	DD
Ant2	15:DN1p_CNMa	0.763488	19.798	0.0059	1.5887e-07	3.03044e-05	38.7672	12.9278	2.99874	HC_cycler	DD
CG33639	15:DN1p_CNMa	0.650393	21.4278	0.0027	1.76855e-07	3.105e-05	2.75242	0.0701577	39.2319	HC_cycler	DD
CG5890	15:DN1p_CNMa	0.608944	19.5709	0.0166	1.83126e-07	3.105e-05	9.65051	0.442563	21.806	HC_cycler	DD
fas	15:DN1p_CNMa	0.618985	5.28851	0.0122	1.83126e-07	3.105e-05	9.43557	2.01221	4.68916	HC_cycler	DD
bun	15:DN1p_CNMa	0.768299	19.3016	0.0031	2.10917e-07	3.32959e-05	52.3559	17.5058	2.99078	HC_cycler	DD
sky	15:DN1p_CNMa	0.773578	20.9019	0.0037	2.10917e-07	3.32959e-05	6.74654	0.565646	11.9272	HC_cycler	DD
HDAC4	15:DN1p_CNMa	0.888987	18.057	0.0003	2.69728e-07	4.11605e-05	5.97719	1.41637	4.22008	HC_cycler	DD
alphaTub84B	15:DN1p_CNMa	0.637088	6.74746	0.0094	2.79133e-07	4.12216e-05	22.3331	8.95778	2.49315	HC_cycler	DD
His3.3B	15:DN1p_CNMa	0.64003	5.93242	0.022	2.99242e-07	4.28103e-05	96.383	37.937	2.54061	HC_cycler	DD
CG34384	15:DN1p_CNMa	0.888536	5.47198	0.0007	3.09989e-07	4.3004e-05	8.60733	1.41314	6.09092	HC_cycler	DD
vri	15:DN1p_CNMa	0.780132	7.88015	0.0008	5.36615e-07	7.22537e-05	7.09874	0.52807	13.4428	HC_cycler	DD
CG6330	15:DN1p_CNMa	0.744349	18.7518	0.0057	5.74219e-07	7.30215e-05	4.0743	0.833083	4.89063	HC_cycler	DD
Hex-A	15:DN1p_CNMa	0.58478	19.1872	0.0272	5.74219e-07	7.30215e-05	5.44876	1.40286	3.88404	HC_cycler	DD
CG4341	15:DN1p_CNMa	0.759847	6.65487	0.0031	5.93631e-07	7.34498e-05	5.36066	1.00603	5.32854	HC_cycler	DD
bru-3	15:DN1p_CNMa	0.835004	21.1774	0.0006	6.79233e-07	7.97315e-05	51.2228	24.8505	2.06124	HC_cycler	DD
NK7.1	15:DN1p_CNMa	0.699022	18.928	0.0092	7.02792e-07	8.04345e-05	2.03512	0.204246	9.96407	HC_cycler	DD
dpr13	15:DN1p_CNMa	0.612023	7.7875	0.0033	7.51471e-07	8.39081e-05	8.90135	1.178	7.5563	HC_cycler	DD
CG15537	15:DN1p_CNMa	0.726059	1.74523	0.0051	1.36153e-06	0.000144955	10.6259	1.14216	9.30339	HC_cycler	DD
CG13300	15:DN1p_CNMa	0.771804	2.90818	0.0009	2.07106e-06	0.000210696	2.9807	0.0390454	76.3394	HC_cycler	DD
Pvr	15:DN1p_CNMa	0.747158	20.0839	0.0021	2.35311e-06	0.000224428	1.38374	0.0452227	30.5983	HC_cycler	DD
tna	15:DN1p_CNMa	0.652958	19.7453	0.0107	2.35311e-06	0.000224428	12.9992	4.58092	2.83769	HC_cycler	DD
nrv1	15:DN1p_CNMa	0.663513	15.0864	0.0027	2.75879e-06	0.000252595	3.69665	0.829609	4.45589	HC_cycler	DD
MYPT-75D	15:DN1p_CNMa	0.789948	7.09242	0.0002	3.3321e-06	0.000299105	3.07092	0.25217	12.178	HC_cycler	DD
FBgn0285925	15:DN1p_CNMa	0.735476	22.8149	0.0014	3.43648e-06	0.000302543	18.7619	6.13946	3.05595	HC_cycler	DD
blot	15:DN1p_CNMa	0.856046	15.7238	0.0007	3.65809e-06	0.000314276	165.559	75.8326	2.18321	HC_cycler	DD
ed	15:DN1p_CNMa	0.753105	18.0407	0.004	3.7757e-06	0.000314276	3.43711	0.483659	7.10647	HC_cycler	DD
side	15:DN1p_CNMa	0.776862	17.9552	0.0044	4.27533e-06	0.000343376	5.19542	0.582298	8.92228	HC_cycler	DD
CG30089	15:DN1p_CNMa	0.57581	6.68732	0.0005	5.47011e-06	0.000431761	3.87823	0.177967	21.7918	HC_cycler	DD
4EHP	15:DN1p_CNMa	0.673579	19.1564	0.0109	7.19055e-06	0.000539645	20.4976	8.15424	2.51374	HC_cycler	DD
CG8405	15:DN1p_CNMa	0.593131	17.7448	0.02	7.19055e-06	0.000539645	4.59571	0.980328	4.68793	HC_cycler	DD
Dh31-R	15:DN1p_CNMa	0.616164	18.9995	0.0297	9.4273e-06	0.000674347	5.72068	0.0919935	62.1857	HC_cycler	DD
Pka-C1	15:DN1p_CNMa	0.776995	23.3249	0.0019	9.14595e-06	0.000674347	19.1331	5.398	3.54448	HC_cycler	DD
SP1173	15:DN1p_CNMa	0.723396	21.7936	0.0006	9.4273e-06	0.000674347	1.50298	0.0452227	33.235	HC_cycler	DD
Mmp2	15:DN1p_CNMa	0.737523	21.246	0.0078	1.34472e-05	0.000932748	9.13855	2.69822	3.38689	HC_cycler	DD
CG43740	15:DN1p_CNMa	0.622817	1.15192	0.0058	1.46759e-05	0.00100278	2.86763	0.390314	7.34698	HC_cycler	DD
CG17778	15:DN1p_CNMa	0.600643	20.5131	0.0175	1.64897e-05	0.00107843	1.89977	0.15709	12.0935	HC_cycler	DD
Sytbeta	15:DN1p_CNMa	0.654857	1.61185	0.0003	1.74747e-05	0.00112675	3.86014	0.650864	5.93079	HC_cycler	DD
Hipk	15:DN1p_CNMa	0.633546	19.5263	0.0108	2.07761e-05	0.00128531	22.3055	5.48715	4.06504	HC_cycler	DD
Rbp9	15:DN1p_CNMa	0.548034	21.3306	0.0229	2.53857e-05	0.00154954	10.0168	2.65863	3.76764	HC_cycler	DD
Sec24CD	15:DN1p_CNMa	0.550311	21.6767	0.0121	2.61071e-05	0.00155219	1.4863	0.0233938	63.5339	HC_cycler	DD
Pu	15:DN1p_CNMa	0.625619	6.60714	0.0172	2.68685e-05	0.00157697	5.93501	1.43362	4.13987	HC_cycler	DD
Mkp3	15:DN1p_CNMa	0.670563	19.5172	0.0057	2.76299e-05	0.00160114	3.68956	0.730647	5.04972	HC_cycler	DD
Baldspot	15:DN1p_CNMa	0.557069	19.9578	0.025	3.00843e-05	0.00172157	5.19358	0.894759	5.80445	HC_cycler	DD
CG42339	15:DN1p_CNMa	0.784332	18.9349	0.0041	3.97958e-05	0.002195	2.2459	0.160736	13.9726	HC_cycler	DD
Spn	15:DN1p_CNMa	0.737171	17.7068	0.002	4.09008e-05	0.00222909	7.05528	1.78004	3.96356	HC_cycler	DD
CG32333	15:DN1p_CNMa	0.591503	6.46818	0.002	4.20655e-05	0.00223925	3.82475	0.245202	15.5984	HC_cycler	DD
CG9705	15:DN1p_CNMa	0.687166	8.53902	0.0013	4.32301e-05	0.00224895	3.63185	0.368182	9.86426	HC_cycler	DD
sm	15:DN1p_CNMa	0.638131	19.8465	0.019	4.32301e-05	0.00224895	26.8995	9.60742	2.79986	HC_cycler	DD
ATPsynG	15:DN1p_CNMa	0.727417	13.3894	0.0039	4.44573e-05	0.00228681	2.19141	0.414387	5.28832	HC_cycler	DD
dpr8	15:DN1p_CNMa	0.669707	10.547	0.0111	6.0068e-05	0.00302188	6.22312	1.66745	3.73211	HC_cycler	DD
CG12858	15:DN1p_CNMa	0.502619	4.27276	0.0445	6.34176e-05	0.00315572	9.63316	2.63325	3.65828	HC_cycler	DD
CG15765	15:DN1p_CNMa	0.757973	11.8833	0.0015	6.51805e-05	0.00320856	12.5243	3.50975	3.56842	HC_cycler	DD
GCS2alpha	15:DN1p_CNMa	0.528142	9.73387	0.032	6.69433e-05	0.00326028	10.6896	4.30177	2.48494	HC_cycler	DD
Drak	15:DN1p_CNMa	0.524073	19.9474	0.0422	7.8666e-05	0.00379087	1.86928	0.27141	6.88729	HC_cycler	DD
Cct1	15:DN1p_CNMa	0.765631	11.7196	0.0011	8.29869e-05	0.00395744	6.55845	1.41288	4.6419	HC_cycler	DD
CG9674	15:DN1p_CNMa	0.622975	22.1968	0.0197	8.99208e-05	0.00420058	4.72391	1.13686	4.15523	HC_cycler	DD
CG9413	15:DN1p_CNMa	0.552523	20.3609	0.0361	9.48225e-05	0.00438482	6.13518	1.48323	4.13636	HC_cycler	DD
Scp2	15:DN1p_CNMa	0.523359	13.3642	0.0217	9.73347e-05	0.00445598	1.40674	0.100381	14.0139	HC_cycler	DD
CG42342	15:DN1p_CNMa	0.69333	9.14696	0.0037	9.99757e-05	0.00453157	4.93265	0.536786	9.18923	HC_cycler	DD
FBgn0284243	15:DN1p_CNMa	0.836819	6.08884	0.0006	0.000114003	0.0050183	6.14858	2.26072	2.71975	HC_cycler	DD
Rbp6	15:DN1p_CNMa	0.523672	9.45561	0.0397	0.000114003	0.0050183	15.365	7.33247	2.09548	HC_cycler	DD
CG9813	15:DN1p_CNMa	0.637342	20.9183	0.008	0.000120133	0.00518838	6.88274	1.22114	5.63635	HC_cycler	DD
Ggamma30A	15:DN1p_CNMa	0.624843	7.65216	0.0103	0.000120133	0.00518838	9.60284	3.80294	2.52511	HC_cycler	DD
CG2865	15:DN1p_CNMa	0.520988	4.36161	0.0477	0.000123353	0.00522879	7.06234	1.40374	5.0311	HC_cycler	DD
CG42541	15:DN1p_CNMa	0.643761	5.34258	0.0024	0.000123353	0.00522879	5.80436	0.745449	7.7864	HC_cycler	DD
fax	15:DN1p_CNMa	0.5382	7.85172	0.0063	0.000126573	0.00531607	30.1293	16.5321	1.82247	HC_cycler	DD
CG11221	15:DN1p_CNMa	0.700773	19.1385	0.005	0.000129955	0.00535979	2.07425	0.140632	14.7494	HC_cycler	DD
Pka-R1	15:DN1p_CNMa	0.752893	22.5684	0.0011	0.000129955	0.00535979	7.04607	1.98439	3.55074	HC_cycler	DD
CG43902	15:DN1p_CNMa	0.622278	3.86132	0.0162	0.000147903	0.00593948	2.19643	0.519474	4.22818	HC_cycler	DD
Fife	15:DN1p_CNMa	0.676744	21.6558	0.0039	0.000159847	0.0063633	7.36192	2.11944	3.47352	HC_cycler	DD
CG14200	15:DN1p_CNMa	0.684546	3.77626	0.0027	0.000201116	0.00773707	6.2619	2.3479	2.66702	HC_cycler	DD
CG15465	15:DN1p_CNMa	0.535734	5.73625	0.0339	0.000211573	0.00807152	18.3541	8.13233	2.25693	HC_cycler	DD
SelR	15:DN1p_CNMa	0.751272	16.8171	0.0036	0.000217057	0.00821227	13.4683	2.71006	4.96974	HC_cycler	DD
CG13917	15:DN1p_CNMa	0.558843	18.3	0.0357	0.00022829	0.00842831	4.15521	1.36126	3.05246	HC_cycler	DD
CR46006	15:DN1p_CNMa	0.667283	19.0501	0.0068	0.000246096	0.00894149	2.80769	0.0478176	58.7167	HC_cycler	DD
CG34155	15:DN1p_CNMa	0.511957	6.44781	0.0014	0.000258735	0.00911145	2.38689	0.082194	29.0397	HC_cycler	DD
mamo	15:DN1p_CNMa	0.82059	4.44035	0.0015	0.000258735	0.00911145	22.1728	9.08314	2.44109	HC_cycler	DD
Pde11	15:DN1p_CNMa	0.5394	20.7386	0.0158	0.000258735	0.00911145	4.65126	1.01919	4.56369	HC_cycler	DD
sfl	15:DN1p_CNMa	0.531976	3.12821	0.0152	0.000271982	0.00950482	4.78962	0.543028	8.82021	HC_cycler	DD
Dgk	15:DN1p_CNMa	0.665586	19.1956	0.0013	0.000308028	0.010683	0.906239	0	1.66	HC_cycler	DD
mei-P26	15:DN1p_CNMa	0.753849	4.0651	0.003	0.000315647	0.0108649	24.7289	9.93946	2.48795	HC_cycler	DD
CG14435	15:DN1p_CNMa	0.59209	2.0606	0.0209	0.000357078	0.0121089	2.73283	0.664229	4.1143	HC_cycler	DD
Bacc	15:DN1p_CNMa	0.703418	4.38857	0.0018	0.000384159	0.012562	18.9075	8.6135	2.1951	HC_cycler	DD
CG32547	15:DN1p_CNMa	0.682669	3.53321	0.0094	0.000384159	0.012562	3.61236	1.40457	2.57186	HC_cycler	DD
Gos28	15:DN1p_CNMa	0.572524	9.42696	0.0233	0.000403345	0.0130958	1.92919	0.256652	7.51675	HC_cycler	DD
CG5071	15:DN1p_CNMa	0.618438	7.54904	0.0095	0.000423426	0.013651	0.961866	0.0263724	36.4725	HC_cycler	DD
PVRAP	15:DN1p_CNMa	0.709511	8.70194	0.0019	0.000489437	0.01556	4.12346	0.551138	7.48172	HC_cycler	DD
lola	15:DN1p_CNMa	0.55088	22.2824	0.034	0.00050147	0.0158326	10.3975	4.06753	2.55621	HC_cycler	DD
Frq1	15:DN1p_CNMa	0.576903	23.6987	0.0131	0.000513502	0.0159919	8.14837	2.23526	3.64538	HC_cycler	DD
CG42353	15:DN1p_CNMa	0.533847	3.69696	0.039	0.000526087	0.0162731	3.71568	0.637539	5.82817	HC_cycler	DD
CG6424	15:DN1p_CNMa	0.58455	19.8474	0.0257	0.000551832	0.0169549	3.70239	0.817065	4.53133	HC_cycler	DD
Pabp2	15:DN1p_CNMa	0.68047	2.0485	0.0011	0.000564992	0.0172435	3.336	0.394845	8.44889	HC_cycler	DD
CG11317	15:DN1p_CNMa	0.619231	9.24218	0.0185	0.000578751	0.0175465	2.96483	0.3681	8.05443	HC_cycler	DD
cwo	15:DN1p_CNMa	0.508297	7.16628	0.0305	0.000606896	0.0180414	3.24836	0.413162	7.86221	HC_cycler	DD
tim	15:DN1p_CNMa	0.628055	10.3869	0.0026	0.000606896	0.0180414	26.4078	6.02852	4.38048	HC_cycler	DD
FBgn0285926	15:DN1p_CNMa	0.644521	4.16871	0.0015	0.000621281	0.0183498	26.0813	8.04972	3.24002	HC_cycler	DD
CG3409	15:DN1p_CNMa	0.812926	18.5611	0.0039	0.000732775	0.0210984	2.10093	0.260469	8.06596	HC_cycler	DD
Ptp4E	15:DN1p_CNMa	0.624762	1.82742	0.0102	0.000749931	0.0214574	3.0618	0.261305	11.7173	HC_cycler	DD
Dh31	15:DN1p_CNMa	0.765319	1.3982	0.0023	0.000785774	0.0222054	72.8366	34.9964	2.08126	HC_cycler	DD
Frq2	15:DN1p_CNMa	0.668204	3.31267	0.0027	0.000804492	0.0225949	4.27174	0.901675	4.73756	HC_cycler	DD
CG32549	15:DN1p_CNMa	0.500934	13.9666	0.0032	0.00082321	0.0227028	8.2546	1.27129	6.49311	HC_cycler	DD
CG8177	15:DN1p_CNMa	0.826362	7.52543	0.0005	0.000842759	0.0229652	3.44233	0.690632	4.98432	HC_cycler	DD
Gpdh	15:DN1p_CNMa	0.675791	17.9251	0.0047	0.000842759	0.0229652	1.73779	0.102141	17.0137	HC_cycler	DD
stai	15:DN1p_CNMa	0.588493	3.74517	0.0182	0.000882718	0.0239117	7.21565	1.92533	3.74774	HC_cycler	DD
St3	15:DN1p_CNMa	0.817439	20.0889	0.0014	0.000967995	0.0259151	0.973205	0.0518712	18.762	HC_cycler	DD
Con	15:DN1p_CNMa	0.60566	0.265758	0.0216	0.0010609	0.0280741	1.71801	0.152048	11.2992	HC_cycler	DD
CG2278	15:DN1p_CNMa	0.555993	3.08644	0.0219	0.00113569	0.029209	1.87152	0.0584726	32.0068	HC_cycler	DD
CR44832	15:DN1p_CNMa	0.686	12.2229	0.0097	0.00113569	0.029209	7.35226	0.62813	11.705	HC_cycler	DD
Bx	15:DN1p_CNMa	0.721959	18.2508	0.0095	0.00121595	0.0304186	8.56466	2.33549	3.66718	HC_cycler	DD
CG11191	15:DN1p_CNMa	0.626212	18.4121	0.012	0.00127215	0.0309782	3.25188	0.523269	6.21454	HC_cycler	DD
CG12239	15:DN1p_CNMa	0.706605	12.4828	0.0056	0.00127215	0.0309782	107.478	4.03414	26.642	HC_cycler	DD
CG14509	15:DN1p_CNMa	0.68468	6.71652	0.0051	0.00127215	0.0309782	3.99192	1.00881	3.95707	HC_cycler	DD
Tob	15:DN1p_CNMa	0.686764	4.2943	0.0038	0.00127215	0.0309782	11.639	2.99461	3.88666	HC_cycler	DD
Sec61gamma	15:DN1p_CNMa	0.636775	2.58383	0.0077	0.00133076	0.0317303	2.64539	0.0818664	32.3135	HC_cycler	DD
tow	15:DN1p_CNMa	0.576049	15.7803	0.0286	0.00133076	0.0317303	2.31832	0.690919	3.35542	HC_cycler	DD
CG14424	15:DN1p_CNMa	0.607765	6.82432	0.0273	0.00145559	0.0341728	1.8634	0.144225	12.9201	HC_cycler	DD
CG2909	15:DN1p_CNMa	0.561233	4.85736	0.0321	0.00148811	0.034758	1.09619	0.105066	10.4333	HC_cycler	DD
Ac13E	15:DN1p_CNMa	0.701498	21.0763	0.0067	0.00155591	0.0357936	1.76905	0.249571	7.08835	HC_cycler	DD
spen	15:DN1p_CNMa	0.516792	17.249	0.0421	0.00155591	0.0357936	12.7572	6.09328	2.09365	HC_cycler	DD
lbk	15:DN1p_CNMa	0.547211	19.8442	0.019	0.00170019	0.0385319	1.28604	0.128654	9.99613	HC_cycler	DD
FBgn0285963	15:DN1p_CNMa	0.682968	6.20875	0.0005	0.00173854	0.0390149	1.47975	0	1.66	HC_cycler	DD
CanA-14F	15:DN1p_CNMa	0.674787	3.20591	0.0042	0.00211698	0.0459315	8.41317	2.35172	3.57746	HC_cycler	DD
CG4467	15:DN1p_CNMa	0.64783	22.4886	0.0146	0.00211698	0.0459315	6.06177	1.49955	4.0424	HC_cycler	DD
CG42784	15:DN1p_CNMa	0.660789	8.97157	0.0174	0.00221096	0.0477441	9.40511	3.74076	2.51423	HC_cycler	DD
Pka-R1	18:DN1p	0.673191	20.9341	0.0022	9.51981e-09	4.35817e-05	15.3351	2.28402	6.71409	HC_cycler	DD
His2Av	18:DN1p	0.503603	5.63457	0.0456	2.74301e-08	6.27876e-05	15.5883	1.62231	9.60868	HC_cycler	DD
Eip63F-1	18:DN1p	0.779113	18.8049	0.0003	9.35588e-08	0.000107078	7.87873	0.883353	8.91912	HC_cycler	DD
His3.3B	18:DN1p	0.676112	7.59474	0.0114	4.02843e-07	0.000263459	98.1803	53.3513	1.84026	HC_cycler	DD
sif	18:DN1p	0.611276	21.6099	0.0204	1.15072e-06	0.0006585	67.8237	29.7381	2.2807	HC_cycler	DD
CG7708	18:DN1p	0.655426	5.93967	0.0138	4.8641e-06	0.00222678	6.36761	0.372615	17.089	HC_cycler	DD
alpha-Spec	18:DN1p	0.658259	12.6671	0.0076	0.000148633	0.0243015	7.75126	1.90603	4.06671	HC_cycler	DD
CG5347	18:DN1p	0.658363	5.67777	0.0151	0.000138232	0.0243015	4.39541	0.0872783	50.3609	HC_cycler	DD
CG32052	18:DN1p	0.752988	19.5722	0.0031	0.000205336	0.0284857	7.02977	0.969964	7.24745	HC_cycler	DD
mod(mdg4)	18:DN1p	0.7459	15.0401	0.0073	0.000253709	0.0331851	4.80678	0.845899	5.68245	HC_cycler	DD
tim	19:DN2	0.791641	8.25825	0.0022	1.1936e-08	5.46429e-05	31.2337	3.11321	10.0326	HC_cycler	DD
Clk	19:DN2	0.84572	21.4288	0.0004	7.07693e-07	0.00161991	7.3394	0.196999	37.2559	HC_cycler	DD
Pka-R1	19:DN2	0.671155	20.6069	0.0116	1.13191e-06	0.00172729	16.9726	2.27813	7.45027	HC_cycler	DD
Pdp1	19:DN2	0.724003	8.75678	0.0036	2.14886e-06	0.00245937	148.965	48.0598	3.09957	HC_cycler	DD
nAChRalpha3	19:DN2	0.680999	6.37876	0.0089	3.66741e-06	0.00335788	10.158	0.834461	12.1731	HC_cycler	DD
CG32052	19:DN2	0.581646	18.7238	0.0039	6.17579e-06	0.0035341	8.43836	0.793684	10.6319	HC_cycler	DD
bru-3	19:DN2	0.593453	17.5368	0.0284	1.31701e-05	0.00548117	102.252	49.4278	2.06871	HC_cycler	DD
CG11319	19:DN2	0.666943	19.7811	0.0124	1.26473e-05	0.00548117	15.4988	2.33295	6.64341	HC_cycler	DD
oc	19:DN2	0.588767	5.72829	0.0013	1.26473e-05	0.00548117	4.95491	0	1.66	HC_cycler	DD
CG13054	19:DN2	0.666444	7.75461	0.0014	1.8272e-05	0.00670594	12.9192	2.89513	4.4624	HC_cycler	DD
CG1402	19:DN2	0.824532	20.3473	0.0007	1.90427e-05	0.00670594	14.6085	2.81882	5.18247	HC_cycler	DD
vri	19:DN2	0.856181	7.76606	0.0012	2.06454e-05	0.00675103	12.9592	2.45262	5.2838	HC_cycler	DD
Pdfr	19:DN2	0.575756	20.75	0.0193	7.74631e-05	0.0236417	15.4899	3.04291	5.09049	HC_cycler	DD
Argk	19:DN2	0.520919	19.8473	0.0447	0.000139697	0.0355297	11.9341	3.17777	3.75548	HC_cycler	DD
His3.3B	19:DN2	0.64698	6.48091	0.0107	0.000155584	0.0356131	102.142	50.2836	2.03131	HC_cycler	DD
SK	19:DN2	0.591696	8.62877	0.0241	0.000155584	0.0356131	17.095	5.75507	2.97043	HC_cycler	DD
beat-IIIc	19:DN2	0.658911	6.25894	0.0037	0.000179563	0.0391447	17.7293	5.26464	3.36761	HC_cycler	DD
cwo	19:DN2	0.663308	8.82851	0.0167	0.000199897	0.0411981	4.55743	0.300689	15.1566	HC_cycler	DD
hdc	19:DN2	0.653555	5.4259	0.0129	0.00020698	0.0411981	16.5844	2.22378	7.45777	HC_cycler	DD
CG43729	2:s_LNv	0.935622	4.88152	0.0001	9.97046e-26	4.56447e-22	36.5369	6.46836	5.64857	HC_cycler	DD
Scp2	2:s_LNv	0.824075	16.4004	0.0003	2.98515e-25	6.83301e-22	39.6949	0.227752	174.29	HC_cycler	DD
HmgZ	2:s_LNv	0.955797	18.3334	0.0001	3.3947e-24	5.18031e-21	15.8785	0.875535	18.1358	HC_cycler	DD
CG43902	2:s_LNv	0.847798	4.32756	0.0001	7.83246e-22	8.96425e-19	57.0729	6.04474	9.44175	HC_cycler	DD
tim	2:s_LNv	0.723197	15.3534	0.0008	2.96724e-21	2.7168e-18	54.6754	1.93568	28.2461	HC_cycler	DD
Sdc	2:s_LNv	0.909782	18.7666	0.0002	4.86722e-21	3.71369e-18	28.5313	5.93331	4.80866	HC_cycler	DD
CG2269	2:s_LNv	0.958696	18.4979	0.0002	1.24189e-20	7.1067e-18	124.532	24.7318	5.03531	HC_cycler	DD
PVRAP	2:s_LNv	0.956545	6.5451	0.0002	1.11751e-20	7.1067e-18	12.7158	1.00352	12.6712	HC_cycler	DD
sNPF	2:s_LNv	0.905948	20.0562	0.0003	2.05816e-20	1.04692e-17	20.7522	0.670235	30.9625	HC_cycler	DD
Pka-C1	2:s_LNv	0.931796	5.43729	0.0001	2.93715e-20	1.34463e-17	49.6702	7.23883	6.86163	HC_cycler	DD
Act5C	2:s_LNv	0.810351	14.9423	0.0001	3.54159e-20	1.47395e-17	39.5019	6.96144	5.67438	HC_cycler	DD
Con	2:s_LNv	0.77679	5.49667	0.0001	1.79139e-19	6.83415e-17	10.5119	0.313195	33.5635	HC_cycler	DD
Tbh	2:s_LNv	0.950841	20.1292	0.0003	2.90684e-19	1.02366e-16	32.0166	5.93237	5.39693	HC_cycler	DD
amon	2:s_LNv	0.901827	4.29306	0.0001	9.9744e-19	3.26163e-16	17.1413	1.63454	10.4869	HC_cycler	DD
Pdp1	2:s_LNv	0.873364	16.2544	0.0008	1.39228e-18	4.24925e-16	105.775	14.4937	7.29802	HC_cycler	DD
CG11317	2:s_LNv	0.838883	17.6431	0.0004	1.59679e-18	4.56882e-16	7.45344	0.521995	14.2788	HC_cycler	DD
cry	2:s_LNv	0.850124	2.5224	0.0004	3.89462e-18	1.0488e-15	14.6094	1.16792	12.5089	HC_cycler	DD
CG31705	2:s_LNv	0.934013	6.40388	0.0001	9.91918e-18	2.52278e-15	24.8595	2.7238	9.1268	HC_cycler	DD
CG32264	2:s_LNv	0.973144	19.765	0.0003	4.76022e-17	1.14696e-14	25.1113	8.2214	3.05438	HC_cycler	DD
CG4577	2:s_LNv	0.909507	6.64721	0.0002	6.38641e-17	1.46185e-14	32.9741	4.35377	7.5737	HC_cycler	DD
robo3	2:s_LNv	0.816178	5.60386	0.0028	6.99964e-17	1.52592e-14	7.68157	0.511614	15.0144	HC_cycler	DD
klg	2:s_LNv	0.931613	1.77831	0.0001	7.66808e-17	1.59566e-14	12.0261	2.05362	5.85607	HC_cycler	DD
mamo	2:s_LNv	0.883467	5.88142	0.0002	1.64235e-16	3.26899e-14	74.241	18.4439	4.02524	HC_cycler	DD
CR44320	2:s_LNv	0.938695	14.7625	0.0001	4.60946e-15	8.44085e-13	8.27186	0.655281	12.6234	HC_cycler	DD
CG13054	2:s_LNv	0.779277	15.0962	0.0005	5.73976e-15	1.01064e-12	14.1921	0.863158	16.4421	HC_cycler	DD
CrebA	2:s_LNv	0.851304	4.09689	0.001	4.66522e-14	7.91014e-12	19.4092	1.50413	12.904	HC_cycler	DD
chrb	2:s_LNv	0.765552	6.66172	0.0001	6.54096e-14	1.06945e-11	90.8958	19.0708	4.76622	HC_cycler	DD
nmo	2:s_LNv	0.84179	3.20365	0.0003	7.67717e-14	1.2096e-11	31.8998	6.06339	5.26105	HC_cycler	DD
svr	2:s_LNv	0.727203	6.20854	0.0009	7.92658e-14	1.2096e-11	13.082	2.0847	6.27521	HC_cycler	DD
Fife	2:s_LNv	0.675883	5.67272	0.0005	1.00689e-13	1.48694e-11	28.021	3.32304	8.43233	HC_cycler	DD
nrv1	2:s_LNv	0.729378	21.0961	0.0002	1.31823e-13	1.8859e-11	6.34662	0.0496182	127.909	HC_cycler	DD
ATPsynbeta	2:s_LNv	0.806194	19.437	0.0008	1.69657e-13	2.3536e-11	8.50422	1.93735	4.38962	HC_cycler	DD
vib	2:s_LNv	0.743761	3.98	0.0007	1.86429e-13	2.51022e-11	17.5616	3.13574	5.60047	HC_cycler	DD
bru-3	2:s_LNv	0.808974	19.4414	0.0012	2.24987e-13	2.94282e-11	65.3129	25.1661	2.59527	HC_cycler	DD
Sec61beta	2:s_LNv	0.815648	5.74749	0.0001	5.87266e-13	7.46806e-11	3.87731	0.316349	12.2564	HC_cycler	DD
fax	2:s_LNv	0.881612	17.8565	0.0008	7.73048e-13	9.5649e-11	28.4436	12.3885	2.29596	HC_cycler	DD
Sytbeta	2:s_LNv	0.709532	6.40814	0.0003	8.86489e-13	1.06799e-10	10.8845	1.13834	9.5617	HC_cycler	DD
CG42389	2:s_LNv	0.853471	6.26996	0.0001	9.13805e-13	1.07267e-10	8.55611	2.30315	3.71496	HC_cycler	DD
Indy	2:s_LNv	0.844342	7.79317	0.0003	1.3533e-12	1.54885e-10	7.23378	0.773857	9.3477	HC_cycler	DD
pog	2:s_LNv	0.739644	5.40791	0.0014	1.77254e-12	1.97919e-10	9.09824	1.33147	6.83324	HC_cycler	DD
CG42337	2:s_LNv	0.916541	15.8859	0.0002	2.18408e-12	2.38064e-10	6.87791	0.347745	19.7786	HC_cycler	DD
vri	2:s_LNv	0.84653	15.3939	0.0012	2.61005e-12	2.7788e-10	12.1701	0.400109	30.4171	HC_cycler	DD
nrv3	2:s_LNv	0.776732	21.7722	0.0015	4.00249e-12	4.16441e-10	53.6292	28.9495	1.85251	HC_cycler	DD
cv-2	2:s_LNv	0.675088	5.01774	0.0001	4.3074e-12	4.38206e-10	5.10551	0.326494	15.6374	HC_cycler	DD
beat-Ia	2:s_LNv	0.848366	18.0193	0.0011	4.43544e-12	4.41422e-10	3.52699	0.154538	22.8228	HC_cycler	DD
FBgn0284248	2:s_LNv	0.833913	20.1528	0.0006	4.70276e-12	4.58069e-10	10.0867	1.83382	5.50039	HC_cycler	DD
CG10804	2:s_LNv	0.767175	5.71542	0.0038	6.29394e-12	6.00285e-10	7.43172	0.410047	18.124	HC_cycler	DD
CG15628	2:s_LNv	0.71182	13.6227	0.0001	7.17064e-12	6.69943e-10	25.5218	4.5704	5.58415	HC_cycler	DD
CG31183	2:s_LNv	0.865927	17.0808	0.0001	1.49129e-11	1.36542e-09	3.11427	0	1.66	HC_cycler	DD
CG2865	2:s_LNv	0.653981	5.71141	0.0117	1.53433e-11	1.37729e-09	5.626	0.707009	7.95747	HC_cycler	DD
Mef2	2:s_LNv	0.941144	17.0834	0.0001	2.18599e-11	1.92451e-09	5.92124	1.0827	5.46897	HC_cycler	DD
Dh31	2:s_LNv	0.749276	7.245	0.0001	2.55234e-11	2.20464e-09	13.1483	1.74361	7.54088	HC_cycler	DD
Clk	2:s_LNv	0.713214	3.41825	0.0021	3.62078e-11	3.06962e-09	4.81119	0.154413	31.158	HC_cycler	DD
CG43373	2:s_LNv	0.816535	18.0724	0.0023	4.84676e-11	4.03427e-09	3.32848	0.340846	9.76536	HC_cycler	DD
sif	2:s_LNv	0.816474	4.39531	0.0001	5.79877e-11	4.74049e-09	26.6805	14.6185	1.82511	HC_cycler	DD
orb	2:s_LNv	0.858947	5.46825	0.0004	5.96065e-11	4.78734e-09	5.35403	0.745652	7.18033	HC_cycler	DD
sli	2:s_LNv	0.810905	6.04066	0.0023	7.95057e-11	6.27547e-09	5.77815	0.718537	8.04156	HC_cycler	DD
CG45186	2:s_LNv	0.78664	20.4847	0.0021	1.02978e-10	7.99037e-09	4.79065	0.587228	8.15807	HC_cycler	DD
CG1648	2:s_LNv	0.842755	4.09697	0.0002	1.07266e-10	8.18436e-09	2.37416	0.297463	7.98134	HC_cycler	DD
CG13594	2:s_LNv	0.89081	4.95263	0.0003	1.27884e-10	9.59761e-09	3.9694	0.60704	6.53894	HC_cycler	DD
CG44247	2:s_LNv	0.925371	3.74154	0.0002	1.96528e-10	1.4281e-08	12.7846	2.42872	5.26392	HC_cycler	DD
HmgD	2:s_LNv	0.703526	16.851	0.0001	2.2758e-10	1.62791e-08	4.50843	0.374168	12.0492	HC_cycler	DD
CG13995	2:s_LNv	0.817634	5.13289	0.0003	2.88941e-10	2.03503e-08	5.05794	0.589428	8.58111	HC_cycler	DD
CG12541	2:s_LNv	0.74744	2.28216	0.0022	7.1165e-10	4.79108e-08	12.3806	3.20701	3.86046	HC_cycler	DD
Ktl	2:s_LNv	0.674968	5.6603	0.0003	7.39796e-10	4.90838e-08	12.144	1.23794	9.80987	HC_cycler	DD
Frq1	2:s_LNv	0.779428	3.44531	0.0001	8.20073e-10	5.36328e-08	11.9922	2.71631	4.41489	HC_cycler	DD
hig	2:s_LNv	0.834598	15.2819	0.0002	1.12936e-09	7.27351e-08	4.80461	1.00778	4.76752	HC_cycler	DD
l(1)G0196	2:s_LNv	0.743327	5.21929	0.0001	1.14393e-09	7.27351e-08	4.05559	0.385861	10.5105	HC_cycler	DD
CG12594	2:s_LNv	0.543631	1.53193	0.0292	1.29912e-09	8.14706e-08	8.29058	0.836847	9.90692	HC_cycler	DD
dpr1	2:s_LNv	0.817941	20.8879	0.0008	1.5909e-09	9.84208e-08	4.23885	0.334758	12.6624	HC_cycler	DD
sm	2:s_LNv	0.831511	19.9672	0.0004	1.92158e-09	1.17293e-07	23.068	8.38481	2.75116	HC_cycler	DD
LpR1	2:s_LNv	0.936841	17.6027	0.0001	2.07184e-09	1.24801e-07	6.54532	1.61262	4.05881	HC_cycler	DD
Ag5r	2:s_LNv	0.7061	6.57298	0.0069	2.59442e-09	1.52272e-07	4.35384	0.204779	21.2611	HC_cycler	DD
CadN	2:s_LNv	0.938831	15.8513	0.0002	2.69335e-09	1.56078e-07	10.6713	2.92007	3.65445	HC_cycler	DD
nAChRalpha6	2:s_LNv	0.823975	16.9936	0.0013	2.8307e-09	1.61987e-07	11.977	3.61566	3.31254	HC_cycler	DD
Thor	2:s_LNv	0.751095	6.20449	0.006	3.1261e-09	1.76683e-07	6.23099	0.603287	10.3284	HC_cycler	DD
CG11221	2:s_LNv	0.780668	4.08032	0.0003	3.24419e-09	1.81121e-07	5.24882	0.183377	28.6231	HC_cycler	DD
aret	2:s_LNv	0.673188	7.39031	0.0119	4.7519e-09	2.55932e-07	7.84637	1.60107	4.90072	HC_cycler	DD
7B2	2:s_LNv	0.601482	11.7098	0.0024	4.86964e-09	2.59223e-07	32.119	12.9597	2.47838	HC_cycler	DD
Dyrk2	2:s_LNv	0.830511	3.35974	0.0011	4.92921e-09	2.59379e-07	12.2001	0.854827	14.272	HC_cycler	DD
Eip63F-1	2:s_LNv	0.770747	15.5053	0.0001	5.05122e-09	2.62778e-07	4.71068	0.55791	8.44345	HC_cycler	DD
jeb	2:s_LNv	0.715741	3.21328	0.0052	5.11369e-09	2.63039e-07	13.6059	4.53199	3.0022	HC_cycler	DD
Nmdmc	2:s_LNv	0.745978	4.06581	0.0003	5.24012e-09	2.66547e-07	3.80673	0.132529	28.7237	HC_cycler	DD
igl	2:s_LNv	0.946961	5.00232	0.0001	5.91922e-09	2.97783e-07	6.40232	1.78276	3.59124	HC_cycler	DD
Shab	2:s_LNv	0.874157	7.54068	0.0002	6.44419e-09	3.20669e-07	4.02954	0.619893	6.50038	HC_cycler	DD
Argk	2:s_LNv	0.777544	2.78967	0.0001	7.363e-09	3.62449e-07	12.045	1.96927	6.11644	HC_cycler	DD
CG13654	2:s_LNv	0.790653	5.7356	0.0002	7.54309e-09	3.67365e-07	2.80964	0.142123	19.769	HC_cycler	DD
Sec61gamma	2:s_LNv	0.712901	5.9892	0.0064	1.10777e-08	5.22823e-07	2.6583	0.411666	6.45743	HC_cycler	DD
Eip93F	2:s_LNv	0.777272	21.6196	0.0018	1.32434e-08	6.12409e-07	17.6984	5.21649	3.39277	HC_cycler	DD
rad	2:s_LNv	0.75973	3.16776	0.0002	1.63888e-08	7.5028e-07	15.544	4.92945	3.15329	HC_cycler	DD
Drep1	2:s_LNv	0.765304	9.5164	0.0001	1.65844e-08	7.51719e-07	2.11302	0.0389693	54.2228	HC_cycler	DD
Nhe2	2:s_LNv	0.679097	2.14725	0.0137	2.27679e-08	1.01196e-06	3.64016	0.606881	5.99815	HC_cycler	DD
CG5347	2:s_LNv	0.691535	6.28401	0.0101	2.38563e-08	1.05013e-06	3.95904	0.134163	29.5092	HC_cycler	DD
bru-2	2:s_LNv	0.652444	5.45553	0.0148	2.41377e-08	1.0524e-06	4.06071	0.585093	6.94027	HC_cycler	DD
CG8745	2:s_LNv	0.675945	5.4107	0.001	2.5885e-08	1.11794e-06	3.9767	0.189727	20.9601	HC_cycler	DD
CG14082	2:s_LNv	0.640424	13.8014	0.0001	3.15255e-08	1.34882e-06	4.23121	0.0270195	156.599	HC_cycler	DD
Jupiter	2:s_LNv	0.705455	15.3863	0.003	3.70506e-08	1.57054e-06	5.28245	0.832538	6.345	HC_cycler	DD
Dh31-R	2:s_LNv	0.86545	12.835	0.0002	4.10886e-08	1.72572e-06	4.513	0.567898	7.94684	HC_cycler	DD
Cbp53E	2:s_LNv	0.70547	5.54286	0.0004	5.04749e-08	2.10067e-06	6.31129	1.76416	3.5775	HC_cycler	DD
nSyb	2:s_LNv	0.722944	6.80292	0.003	5.98499e-08	2.46841e-06	26.7356	14.7019	1.81851	HC_cycler	DD
CG18812	2:s_LNv	0.730809	3.1884	0.0016	7.58632e-08	3.10091e-06	8.31895	1.43325	5.80425	HC_cycler	DD
CG10960	2:s_LNv	0.846487	3.52407	0.0001	7.67162e-08	3.10802e-06	7.99733	1.32253	6.047	HC_cycler	DD
rut	2:s_LNv	0.530821	5.30676	0.0412	7.84596e-08	3.15077e-06	12.0401	1.74982	6.8808	HC_cycler	DD
scrib	2:s_LNv	0.786621	6.31464	0.0013	8.29924e-08	3.30382e-06	3.64649	0.353583	10.3129	HC_cycler	DD
FBgn0284408	2:s_LNv	0.567441	2.73266	0.0224	1.14671e-07	4.48688e-06	22.2361	2.4035	9.25157	HC_cycler	DD
mam	2:s_LNv	0.532682	5.65931	0.0056	1.1987e-07	4.65053e-06	11.4941	1.21277	9.47759	HC_cycler	DD
CG5065	2:s_LNv	0.736901	3.72926	0.0017	1.21211e-07	4.66307e-06	6.40535	1.75958	3.64028	HC_cycler	DD
CG1607	2:s_LNv	0.814988	3.63089	0.0012	2.14372e-07	8.04422e-06	2.65781	0.114743	23.1633	HC_cycler	DD
CG42394	2:s_LNv	0.653616	6.41445	0.0064	2.21454e-07	8.17594e-06	10.0324	1.34127	7.47976	HC_cycler	DD
Tango13	2:s_LNv	0.604517	0.402543	0.0069	2.21454e-07	8.17594e-06	9.87029	2.15732	4.57526	HC_cycler	DD
CtsB1	2:s_LNv	0.614831	8.15028	0.0159	2.23881e-07	8.19943e-06	5.1063	1.50045	3.40318	HC_cycler	DD
Rbp6	2:s_LNv	0.720727	3.9905	0.0006	2.96388e-07	1.07688e-05	31.502	11.4465	2.75211	HC_cycler	DD
lola	2:s_LNv	0.834195	4.80269	0.001	3.06068e-07	1.10329e-05	11.5896	5.61189	2.06518	HC_cycler	DD
eIF3-S9	2:s_LNv	0.764074	7.66064	0.0016	3.09386e-07	1.10654e-05	4.54661	1.53325	2.96534	HC_cycler	DD
CG13954	2:s_LNv	0.761917	9.01809	0.0034	3.12703e-07	1.10973e-05	10.5904	3.09827	3.41818	HC_cycler	DD
Rim	2:s_LNv	0.86116	8.07968	0.0007	3.29919e-07	1.16182e-05	10.6412	5.08165	2.09405	HC_cycler	DD
CG7332	2:s_LNv	0.552181	6.24127	0.0343	3.59351e-07	1.2463e-05	3.96224	1.29275	3.06497	HC_cycler	DD
blw	2:s_LNv	0.835651	19.3799	0.0024	3.9547e-07	1.36125e-05	8.82515	3.91256	2.25559	HC_cycler	DD
CG5916	2:s_LNv	0.775058	5.04191	0.0021	4.08299e-07	1.39492e-05	2.44842	0.196253	12.4759	HC_cycler	DD
CG42260	2:s_LNv	0.665969	6.16545	0.0042	4.53944e-07	1.52806e-05	6.12071	1.58774	3.85498	HC_cycler	DD
Mkp3	2:s_LNv	0.709373	10.7149	0.0066	4.83652e-07	1.60446e-05	3.34486	0.505509	6.61682	HC_cycler	DD
beat-Ic	2:s_LNv	0.609842	4.82676	0.0229	5.66324e-07	1.85188e-05	7.1287	1.49814	4.75837	HC_cycler	DD
Gp210	2:s_LNv	0.787153	17.5964	0.0017	6.28858e-07	2.04178e-05	2.24075	0.0187926	119.236	HC_cycler	DD
kuz	2:s_LNv	0.776097	2.06427	0.0018	6.76571e-07	2.18123e-05	4.30809	0.976015	4.41396	HC_cycler	DD
cpo	2:s_LNv	0.661445	18.0449	0.0063	6.98019e-07	2.23464e-05	18.679	9.44451	1.97776	HC_cycler	DD
Cam	2:s_LNv	0.761742	17.383	0.0007	7.12705e-07	2.26581e-05	88.8628	48.5533	1.83021	HC_cycler	DD
CG33543	2:s_LNv	0.582608	5.81012	0.0253	7.27687e-07	2.29748e-05	2.49037	0.280533	8.87729	HC_cycler	DD
dpr15	2:s_LNv	0.747582	19.416	0.0064	7.9899e-07	2.50533e-05	1.93563	0.10974	17.6383	HC_cycler	DD
Tapdelta	2:s_LNv	0.643678	5.71105	0.0189	8.24162e-07	2.56668e-05	2.34609	0.486949	4.81793	HC_cycler	DD
CG15485	2:s_LNv	0.782993	5.1371	0.0009	8.95201e-07	2.76907e-05	1.40186	0.0641159	21.8644	HC_cycler	DD
FBgn0284243	2:s_LNv	0.573771	18.7577	0.0245	9.92318e-07	3.04888e-05	9.17099	3.11836	2.94097	HC_cycler	DD
Hsc70-4	2:s_LNv	0.668049	14.7019	0.006	1.00262e-06	3.06e-05	18.4805	7.62668	2.42313	HC_cycler	DD
nvy	2:s_LNv	0.682896	8.46933	0.0053	1.02343e-06	3.10282e-05	1.29364	0.064911	19.9294	HC_cycler	DD
CG6024	2:s_LNv	0.870524	18.3365	0.002	1.09954e-06	3.31163e-05	6.33485	1.72111	3.68067	HC_cycler	DD
arm	2:s_LNv	0.85556	17.2285	0.0003	1.23041e-06	3.68158e-05	5.42717	2.06223	2.6317	HC_cycler	DD
Hsc70-3	2:s_LNv	0.6761	5.77773	0.0026	1.41867e-06	4.19012e-05	19.1177	5.44202	3.51298	HC_cycler	DD
mtt	2:s_LNv	0.691043	18.5457	0.0105	1.55394e-06	4.53118e-05	3.73396	0.279473	13.3607	HC_cycler	DD
CG6329	2:s_LNv	0.747805	22.537	0.0017	1.618e-06	4.68811e-05	15.6175	6.9789	2.23781	HC_cycler	DD
CG10738	2:s_LNv	0.724366	18.499	0.0085	1.70174e-06	4.89972e-05	1.63557	0.0602574	27.1431	HC_cycler	DD
tyf	2:s_LNv	0.790302	5.79566	0.0002	1.80762e-06	5.17206e-05	12.3542	2.72773	4.52911	HC_cycler	DD
ctrip	2:s_LNv	0.826144	16.5203	0.0001	1.86282e-06	5.29689e-05	7.07199	2.29854	3.07673	HC_cycler	DD
5-HT1A	2:s_LNv	0.908239	17.37	0.0008	2.07988e-06	5.79328e-05	3.7354	0.597243	6.25441	HC_cycler	DD
Atpalpha	2:s_LNv	0.750541	22.9039	0.003	2.10066e-06	5.79328e-05	66.368	43.6762	1.51954	HC_cycler	DD
Bx	2:s_LNv	0.795465	19.0306	0.0028	2.48823e-06	6.74032e-05	8.31834	2.97434	2.79671	HC_cycler	DD
dlg1	2:s_LNv	0.708743	20.4787	0.0058	2.5381e-06	6.83494e-05	9.01673	3.55777	2.53438	HC_cycler	DD
l(3)neo38	2:s_LNv	0.662505	16.837	0.0143	3.03218e-06	8.02389e-05	6.47455	1.85341	3.49332	HC_cycler	DD
Dscam1	2:s_LNv	0.900123	19.6356	0.0002	3.41155e-06	8.92461e-05	3.4674	0.700753	4.94811	HC_cycler	DD
CG8861	2:s_LNv	0.622493	3.96253	0.0119	3.54784e-06	9.22841e-05	13.8296	3.34412	4.13551	HC_cycler	DD
CG43066	2:s_LNv	0.589062	2.98073	0.0218	4.02761e-06	0.000103587	8.49933	1.97958	4.2935	HC_cycler	DD
Nlg3	2:s_LNv	0.666212	19.6876	0.0009	4.26958e-06	0.00010799	2.34457	0.20003	11.7211	HC_cycler	DD
tna	2:s_LNv	0.60282	0.636911	0.0189	4.61398e-06	0.000115425	6.08209	1.25484	4.8469	HC_cycler	DD
Ef1alpha100E	2:s_LNv	0.804454	16.3037	0.0005	5.70394e-06	0.00014039	27.6141	17.8067	1.55077	HC_cycler	DD
Mob2	2:s_LNv	0.591583	3.05632	0.03	5.75919e-06	0.000140992	5.52523	1.52492	3.62329	HC_cycler	DD
FBgn0285952	2:s_LNv	0.717578	15.4332	0.0056	6.58459e-06	0.000160342	3.58374	1.3309	2.69272	HC_cycler	DD
CG44153	2:s_LNv	0.518476	4.57048	0.033	8.834e-06	0.000210636	3.83551	1.32566	2.89328	HC_cycler	DD
CG5885	2:s_LNv	0.771861	4.31043	0.0014	9.88884e-06	0.000228642	3.12016	0.584654	5.33675	HC_cycler	DD
Dap160	2:s_LNv	0.573154	1.21579	0.0195	9.88884e-06	0.000228642	2.93699	0.955591	3.07347	HC_cycler	DD
CG1504	2:s_LNv	0.862814	6.55048	0.0003	1.07584e-05	0.000247498	3.20186	1.06269	3.01298	HC_cycler	DD
ATPsynG	2:s_LNv	0.850375	19.1517	0.0006	1.10636e-05	0.000251852	1.60596	0.40224	3.99253	HC_cycler	DD
CG42788	2:s_LNv	0.830092	7.51532	0.001	1.11678e-05	0.000251852	1.40629	0.0525751	26.7483	HC_cycler	DD
sprt	2:s_LNv	0.586667	5.72673	0.0037	1.11678e-05	0.000251852	3.66359	0.291342	12.5749	HC_cycler	DD
CG14424	2:s_LNv	0.547162	6.95711	0.0042	1.1378e-05	0.00025409	3.25253	0.0758617	42.8745	HC_cycler	DD
Hasp	2:s_LNv	0.736466	18.5365	0.0061	1.24871e-05	0.000276164	4.53158	0.85201	5.3187	HC_cycler	DD
Sec23	2:s_LNv	0.567189	5.39735	0.0268	1.36992e-05	0.000298643	1.48492	0.351094	4.22941	HC_cycler	DD
Trpm	2:s_LNv	0.6169	18.1792	0.0146	1.51617e-05	0.000328958	4.77177	1.85788	2.5684	HC_cycler	DD
CG17778	2:s_LNv	0.681582	4.64392	0.0043	1.57298e-05	0.000339674	1.69999	0.0551907	30.802	HC_cycler	DD
mspo	2:s_LNv	0.811495	17.1614	0.0002	1.73997e-05	0.00037397	1.90221	0.153531	12.3897	HC_cycler	DD
CG8177	2:s_LNv	0.738401	13.532	0.0054	1.78828e-05	0.000382557	3.76097	0.933223	4.03009	HC_cycler	DD
CG42613	2:s_LNv	0.842019	15.9459	0.0004	1.80476e-05	0.000384288	6.69734	1.99555	3.35614	HC_cycler	DD
2mit	2:s_LNv	0.656421	15.6301	0.0178	1.83801e-05	0.000387762	8.90134	1.55739	5.71554	HC_cycler	DD
sky	2:s_LNv	0.719509	6.41451	0.0031	1.83801e-05	0.000387762	4.23323	1.3042	3.24585	HC_cycler	DD
fas	2:s_LNv	0.71606	18.9801	0.0033	1.87185e-05	0.000389516	10.7973	1.90473	5.66869	HC_cycler	DD
SK	2:s_LNv	0.867676	16.9959	0.0007	1.959e-05	0.000405805	21.2489	8.93032	2.37941	HC_cycler	DD
eIF3ga	2:s_LNv	0.682084	6.37608	0.0109	2.10667e-05	0.00043443	2.10508	0.426803	4.93221	HC_cycler	DD
beat-Ib	2:s_LNv	0.518169	4.53641	0.0375	2.14522e-05	0.000440395	4.38456	0.840317	5.21774	HC_cycler	DD
SsRbeta	2:s_LNv	0.568547	5.52067	0.009	2.28559e-05	0.000465042	7.76357	2.41663	3.21256	HC_cycler	DD
ps	2:s_LNv	0.570835	16.8112	0.0296	2.47876e-05	0.000499902	36.6612	15.3786	2.38391	HC_cycler	DD
CG31323	2:s_LNv	0.758406	18.0058	0.0024	3.24195e-05	0.000642495	1.35378	0.029423	46.011	HC_cycler	DD
scyl	2:s_LNv	0.689638	7.39865	0.0083	3.24195e-05	0.000642495	50.0588	23.8545	2.0985	HC_cycler	DD
CG34357	2:s_LNv	0.601697	1.19191	0.0156	3.27102e-05	0.000645462	3.68009	0.795041	4.6288	HC_cycler	DD
CG10576	2:s_LNv	0.869173	4.63792	0.0002	3.3893e-05	0.000665932	1.22149	0.233662	5.22761	HC_cycler	DD
Sec61alpha	2:s_LNv	0.71939	4.64058	0.0058	3.63821e-05	0.00070575	3.28748	0.911897	3.6051	HC_cycler	DD
TwdlY	2:s_LNv	0.582095	7.4166	0.0317	3.63821e-05	0.00070575	1.5989	0.0169335	94.4227	HC_cycler	DD
ATPsynC	2:s_LNv	0.56589	22.7769	0.0178	3.67038e-05	0.000706008	9.45705	3.9433	2.39826	HC_cycler	DD
NUCB1	2:s_LNv	0.86936	6.79539	0.0005	3.67038e-05	0.000706008	1.85866	0.705958	2.63281	HC_cycler	DD
Ac78C	2:s_LNv	0.62575	0.314593	0.0028	3.73582e-05	0.00071559	2.32887	0.480772	4.84401	HC_cycler	DD
LamC	2:s_LNv	0.575265	18.9749	0.0304	3.90447e-05	0.000744778	1.72072	0.212697	8.09	HC_cycler	DD
Pura	2:s_LNv	0.866553	15.1581	0.0003	4.04446e-05	0.00076828	1.69566	0	1.66	HC_cycler	DD
Klp3A	2:s_LNv	0.888712	6.81211	0.0005	4.30088e-05	0.000803649	1.82222	0.0189949	95.9316	HC_cycler	DD
sty	2:s_LNv	0.752213	4.4307	0.0012	4.30088e-05	0.000803649	2.07761	0.341733	6.07963	HC_cycler	DD
sdk	2:s_LNv	0.776177	20.3268	0.0008	4.45436e-05	0.000828946	1.53921	0	1.66	HC_cycler	DD
CG32276	2:s_LNv	0.595958	5.98978	0.0145	4.86123e-05	0.000890189	1.77874	0.465905	3.81781	HC_cycler	DD
RpS2	2:s_LNv	0.723153	17.8415	0.0044	5.25763e-05	0.000958942	6.88149	3.8856	1.77102	HC_cycler	DD
htl	2:s_LNv	0.822359	4.61008	0.0001	5.49065e-05	0.000985733	1.38097	0	1.66	HC_cycler	DD
sdt	2:s_LNv	0.523347	6.18401	0.0411	6.52564e-05	0.00114461	4.87388	2.04268	2.38603	HC_cycler	DD
tsr	2:s_LNv	0.67907	17.7343	0.0119	6.52564e-05	0.00114461	3.24619	0.84627	3.83588	HC_cycler	DD
CG14024	2:s_LNv	0.620244	16.3741	0.0069	6.81223e-05	0.00118248	2.90384	0.792731	3.66308	HC_cycler	DD
Idh	2:s_LNv	0.677447	18.5319	0.0127	6.87067e-05	0.00118248	2.7026	0.690488	3.91405	HC_cycler	DD
Rgk1	2:s_LNv	0.622714	5.78244	0.0017	6.87067e-05	0.00118248	3.86924	0.387445	9.98655	HC_cycler	DD
Hex-A	2:s_LNv	0.695098	16.2636	0.0035	6.98949e-05	0.00119395	3.73964	0.953584	3.92167	HC_cycler	DD
A2bp1	2:s_LNv	0.605005	14.6186	0.0199	7.11026e-05	0.00120558	8.4575	3.60808	2.34404	HC_cycler	DD
porin	2:s_LNv	0.654921	3.97499	0.0109	7.11026e-05	0.00120558	9.85921	5.17426	1.90543	HC_cycler	DD
GABA-B-R3	2:s_LNv	0.692494	7.9597	0.006	7.61345e-05	0.00128614	1.50213	0.0688921	21.8041	HC_cycler	DD
RpL18A	2:s_LNv	0.636841	17.7836	0.0141	7.74443e-05	0.00130346	8.32119	3.81001	2.18403	HC_cycler	DD
CG12239	2:s_LNv	0.596679	12.9801	0.0206	7.81099e-05	0.00130984	73.9616	2.53316	29.1973	HC_cycler	DD
Ant2	2:s_LNv	0.568314	0.0795501	0.0166	8.4321e-05	0.00139358	32.3878	14.5752	2.22212	HC_cycler	DD
CD98hc	2:s_LNv	0.607584	6.08149	0.0002	9.25571e-05	0.00151873	4.85197	0.999624	4.85379	HC_cycler	DD
tutl	2:s_LNv	0.742823	18.1379	0.0075	9.49285e-05	0.00154656	10.7854	5.88972	1.83122	HC_cycler	DD
tai	2:s_LNv	0.770045	1.19261	0.0011	9.7364e-05	0.00158061	5.04133	2.23758	2.25303	HC_cycler	DD
cmpy	2:s_LNv	0.59792	21.4811	0.005	0.000124127	0.0019869	2.56439	0.573269	4.47327	HC_cycler	DD
Xbp1	2:s_LNv	0.724198	6.93428	0.0029	0.000126209	0.00201319	2.6894	0.730751	3.68033	HC_cycler	DD
CG31221	2:s_LNv	0.576138	17.2726	0.0165	0.000132658	0.00210141	10.2455	2.98669	3.43039	HC_cycler	DD
CG7706	2:s_LNv	0.56102	13.6177	0.0029	0.000134876	0.00212917	3.26927	0.176271	18.5468	HC_cycler	DD
GC	2:s_LNv	0.665779	16.9052	0.0141	0.000147721	0.00229243	5.88743	2.10813	2.79272	HC_cycler	DD
REPTOR	2:s_LNv	0.559997	23.521	0.0071	0.000147721	0.00229243	6.77037	2.59954	2.60445	HC_cycler	DD
CG42674	2:s_LNv	0.79033	23.743	0.001	0.000156481	0.00240393	2.9648	0.419968	7.05958	HC_cycler	DD
tey	2:s_LNv	0.514377	5.90422	0.0483	0.000157778	0.00241575	3.11858	0.222229	14.0332	HC_cycler	DD
MFS3	2:s_LNv	0.665779	7.96883	0.004	0.000160392	0.00243137	1.39627	0.0135826	102.799	HC_cycler	DD
Actn	2:s_LNv	0.543529	6.56201	0.007	0.000161709	0.00243521	3.94543	1.08273	3.64397	HC_cycler	DD
COX7A	2:s_LNv	0.766625	18.0932	0.0017	0.000161709	0.00243521	3.8459	1.38328	2.78027	HC_cycler	DD
twit	2:s_LNv	0.575708	6.30339	0.001	0.000169861	0.00254959	1.90265	0.0928662	20.4881	HC_cycler	DD
CG5010	2:s_LNv	0.753548	18.3528	0.0055	0.000174087	0.00260449	3.18441	1.18649	2.68388	HC_cycler	DD
apt	2:s_LNv	0.695953	16.0554	0.0035	0.000176956	0.00263021	1.56394	0	1.66	HC_cycler	DD
EndoA	2:s_LNv	0.60778	15.659	0.0123	0.000176956	0.00263021	4.12812	1.46081	2.82591	HC_cycler	DD
g	2:s_LNv	0.621096	3.95221	0.0022	0.000181338	0.00268661	3.11291	0.747859	4.16242	HC_cycler	DD
Calx	2:s_LNv	0.612176	15.8363	0.0256	0.000182829	0.00269996	2.36714	0.138447	17.0979	HC_cycler	DD
Pka-C3	2:s_LNv	0.695976	4.95304	0.008	0.000185833	0.00273551	8.92178	2.1553	4.13947	HC_cycler	DD
CngB	2:s_LNv	0.757357	17.6713	0.003	0.000188885	0.00274513	2.60843	0.659948	3.95247	HC_cycler	DD
Dh44	2:s_LNv	0.677206	14.8943	0.0123	0.000188885	0.00274513	1.38677	0.12401	11.1828	HC_cycler	DD
nord	2:s_LNv	0.640855	10.791	0.0077	0.000188885	0.00274513	1.39555	0.227738	6.12788	HC_cycler	DD
Pu	2:s_LNv	0.563631	12.692	0.0118	0.000203207	0.00290712	1.02244	0.0311778	32.7937	HC_cycler	DD
RpL7	2:s_LNv	0.603161	18.2116	0.0223	0.000206527	0.00294543	6.16225	2.62115	2.35097	HC_cycler	DD
hbs	2:s_LNv	0.565611	5.84049	0.0024	0.000236906	0.00332686	1.26467	0.0550789	22.961	HC_cycler	DD
CG13532	2:s_LNv	0.839229	15.4593	0.0011	0.0002486	0.00346978	1.89869	0.445399	4.26291	HC_cycler	DD
CG8958	2:s_LNv	0.65543	7.97681	0.0075	0.000267158	0.00366183	1.03132	0	1.66	HC_cycler	DD
Sam-S	2:s_LNv	0.518316	19.8378	0.0298	0.000269309	0.00368028	2.70821	1.02115	2.65213	HC_cycler	DD
CG6115	2:s_LNv	0.740312	16.0411	0.002	0.000271459	0.00369862	2.06889	0.610643	3.38805	HC_cycler	DD
RpS5a	2:s_LNv	0.57068	17.4834	0.0267	0.000273641	0.0037173	10.9014	5.36542	2.03178	HC_cycler	DD
CG31475	2:s_LNv	0.848043	2.61474	0.0008	0.00027804	0.00376588	3.34511	1.08662	3.07845	HC_cycler	DD
IA-2	2:s_LNv	0.515293	3.75116	0.0439	0.000280256	0.00378469	102.186	65.4585	1.56108	HC_cycler	DD
ergic53	2:s_LNv	0.677526	6.69717	0.0155	0.000323279	0.00432741	2.9099	0.759355	3.83206	HC_cycler	DD
Nep2	2:s_LNv	0.691153	16.7858	0.0077	0.000323279	0.00432741	1.43251	0.0435575	32.8878	HC_cycler	DD
CG12994	2:s_LNv	0.725467	5.90411	0.0028	0.000328427	0.00437075	0.935911	0.017422	53.7202	HC_cycler	DD
CG9149	2:s_LNv	0.510554	11.5755	0.033	0.000336303	0.00443688	0.885025	0	1.66	HC_cycler	DD
ND-49	2:s_LNv	0.646645	17.9554	0.0073	0.000336303	0.00443688	2.77935	0.76219	3.64653	HC_cycler	DD
CG31324	2:s_LNv	0.874797	15.1744	0.0001	0.000344338	0.00451684	2.79245	0.382232	7.30563	HC_cycler	DD
Tudor-SN	2:s_LNv	0.867293	6.37439	0.0001	0.000352573	0.00458545	1.59456	0.399327	3.99312	HC_cycler	DD
CG15431	2:s_LNv	0.666623	19.2783	0.0083	0.000375423	0.00484137	1.39227	0.178717	7.79038	HC_cycler	DD
levy	2:s_LNv	0.699813	20.7397	0.0069	0.00038135	0.00490399	1.46384	0.331979	4.40945	HC_cycler	DD
zip	2:s_LNv	0.673307	17.5609	0.0125	0.000399664	0.00508239	4.88529	1.87107	2.61096	HC_cycler	DD
Hsp83	2:s_LNv	0.666402	14.8002	0.0112	0.00041233	0.0052145	7.7236	3.20106	2.41283	HC_cycler	DD
Appl	2:s_LNv	0.528095	10.2657	0.0311	0.000428683	0.00537674	36.6251	19.773	1.85227	HC_cycler	DD
futsch	2:s_LNv	0.547486	8.95709	0.028	0.000442213	0.00550123	13.6598	7.88453	1.73248	HC_cycler	DD
Drat	2:s_LNv	0.714127	13.9325	0.0023	0.000445671	0.00552921	5.75831	1.90326	3.0255	HC_cycler	DD
CG33233	2:s_LNv	0.685546	3.91061	0.0032	0.000481538	0.00592602	1.51465	0.125681	12.0515	HC_cycler	DD
SP2353	2:s_LNv	0.849922	12.1438	0.0002	0.000528165	0.00637979	6.48799	2.20974	2.93608	HC_cycler	DD
fs(1)h	2:s_LNv	0.501567	5.89318	0.0462	0.000532222	0.00641187	9.75145	4.60783	2.11628	HC_cycler	DD
Glut4EF	2:s_LNv	0.587197	4.3827	0.0148	0.000536338	0.0064445	9.04418	2.51299	3.59897	HC_cycler	DD
5-HT2B	2:s_LNv	0.646977	10.0933	0.004	0.000544629	0.006493	0.964134	0.0116249	82.9367	HC_cycler	DD
Got1	2:s_LNv	0.558128	6.8695	0.0315	0.000561575	0.00667764	1.18168	0.111238	10.623	HC_cycler	DD
CadN2	2:s_LNv	0.754335	19.883	0.0018	0.000574592	0.0067796	1.82543	0.0805348	22.6663	HC_cycler	DD
CG9413	2:s_LNv	0.753329	5.98418	0.0027	0.000615436	0.00720579	3.07158	1.47861	2.07734	HC_cycler	DD
Cyp1	2:s_LNv	0.76376	17.4316	0.0037	0.000727006	0.00836239	6.65574	3.5467	1.8766	HC_cycler	DD
l(1)G0289	2:s_LNv	0.599732	4.73646	0.0182	0.000732484	0.00840429	3.19337	0.95699	3.33689	HC_cycler	DD
bel	2:s_LNv	0.812229	16.8444	0.0009	0.000738039	0.00844686	2.51265	0.827807	3.03531	HC_cycler	DD
CG32944	2:s_LNv	0.703632	3.97033	0.003	0.000760579	0.00866152	1.15822	0.101362	11.4266	HC_cycler	DD
cwo	2:s_LNv	0.522322	19.0057	0.0467	0.000813656	0.00917468	8.78304	4.26128	2.06113	HC_cycler	DD
Hrb87F	2:s_LNv	0.566538	16.6093	0.026	0.00084466	0.00947758	2.33929	0.860823	2.7175	HC_cycler	DD
Hsc70-5	2:s_LNv	0.586319	17.7038	0.0208	0.000876724	0.0098133	1.96857	0.538675	3.65446	HC_cycler	DD
Mnt	2:s_LNv	0.541121	15.8563	0.0268	0.000958452	0.0107019	8.67598	4.05044	2.14199	HC_cycler	DD
deltaCOP	2:s_LNv	0.546248	4.7525	0.0103	0.00100939	0.011216	1.46715	0.346369	4.23579	HC_cycler	DD
CG9650	2:s_LNv	0.605045	22.9031	0.018	0.00105505	0.0116667	6.09456	2.46748	2.46995	HC_cycler	DD
CG14441	2:s_LNv	0.597423	11.3589	0.0171	0.00108654	0.0118433	4.47741	1.91806	2.33434	HC_cycler	DD
Dp1	2:s_LNv	0.532328	6.31768	0.0315	0.00119508	0.0128429	2.3876	0.728043	3.27948	HC_cycler	DD
vig	2:s_LNv	0.740671	15.559	0.0009	0.00120386	0.0128769	4.37776	2.01869	2.16862	HC_cycler	DD
b6	2:s_LNv	0.506878	9.75378	0.0387	0.00133296	0.014093	0.884501	0.0109857	80.5142	HC_cycler	DD
Sod2	2:s_LNv	0.592068	19.0756	0.0148	0.00133296	0.014093	0.860783	0.0991623	8.68055	HC_cycler	DD
mgl	2:s_LNv	0.588955	4.19796	0.0249	0.00141242	0.0146956	12.8358	5.28883	2.42696	HC_cycler	DD
ATPsynB	2:s_LNv	0.701694	21.3964	0.002	0.00143296	0.0148755	1.85542	0.693708	2.67465	HC_cycler	DD
CG13868	2:s_LNv	0.702159	14.3442	0.0111	0.0014433	0.014949	4.55015	1.52616	2.98144	HC_cycler	DD
Ca-beta	2:s_LNv	0.585852	8.61329	0.0209	0.00148552	0.0152482	3.56283	1.39375	2.5563	HC_cycler	DD
sick	2:s_LNv	0.539634	5.26086	0.0292	0.00153995	0.0157715	4.15344	1.08514	3.82757	HC_cycler	DD
CG1640	2:s_LNv	0.512928	10.6185	0.0379	0.00155101	0.0158494	1.10651	0.146762	7.53951	HC_cycler	DD
rdx	2:s_LNv	0.545564	14.0913	0.0402	0.00161919	0.0164725	8.5521	2.33363	3.66472	HC_cycler	DD
CG30415	2:s_LNv	0.731789	19.7789	0.0035	0.00166618	0.016691	0.930412	0.182104	5.10923	HC_cycler	DD
CG43921	2:s_LNv	0.545837	14.9097	0.0266	0.00166618	0.016691	6.92259	2.51557	2.7519	HC_cycler	DD
mts	2:s_LNv	0.740757	18.0358	0.0085	0.00176401	0.0175558	11.1427	6.66258	1.67243	HC_cycler	DD
chn	2:s_LNv	0.78468	1.85228	0.0012	0.00177665	0.017605	5.14512	1.63804	3.14102	HC_cycler	DD
hppy	2:s_LNv	0.660808	6.89079	0.0018	0.00177665	0.017605	1.29309	0.244936	5.27928	HC_cycler	DD
CG42339	2:s_LNv	0.75637	22.1331	0.007	0.00188051	0.0184346	1.14431	0.0926961	12.3448	HC_cycler	DD
egh	2:s_LNv	0.556803	8.4442	0.0236	0.00188051	0.0184346	5.05901	1.73553	2.91496	HC_cycler	DD
CG12237	2:s_LNv	0.70845	13.1135	0.0056	0.00194822	0.0189765	2.83506	0.893696	3.17228	HC_cycler	DD
pre-mod(mdg4)-T	2:s_LNv	0.60138	5.30884	0.0174	0.00194822	0.0189765	1.25505	0.342881	3.66031	HC_cycler	DD
CR44832	2:s_LNv	0.668759	13.09	0.0157	0.00199	0.0193013	4.78564	0.310038	15.4356	HC_cycler	DD
CG40472	2:s_LNv	0.730626	19.607	0.0029	0.00201829	0.0195343	1.33395	0.425853	3.13242	HC_cycler	DD
Gp93	2:s_LNv	0.692924	5.75549	0.001	0.00216543	0.0207392	1.79061	0.426096	4.20236	HC_cycler	DD
Tom20	2:s_LNv	0.650853	14.9813	0.01	0.00218063	0.0207545	1.03178	0.333925	3.08985	HC_cycler	DD
CG11883	2:s_LNv	0.789002	16.3035	0.0021	0.00229027	0.0216182	1.48742	0.314928	4.72305	HC_cycler	DD
CG30116	2:s_LNv	0.596715	8.55046	0.0118	0.00235517	0.0220942	2.4616	0.873677	2.81751	HC_cycler	DD
Nplp1	2:s_LNv	0.738071	2.02961	0.0013	0.00235517	0.0220942	4.76295	0.695085	6.85233	HC_cycler	DD
Ten-m	2:s_LNv	0.531732	9.25381	0.0357	0.00238826	0.0223132	2.91031	1.72166	1.69041	HC_cycler	DD
CR15345	2:s_LNv	0.693919	6.27793	0.0102	0.00254252	0.0236099	1.94636	0.47767	4.0747	HC_cycler	DD
CG15630	2:s_LNv	0.746418	8.20761	0.003	0.00256029	0.023631	6.10846	2.3378	2.61291	HC_cycler	DD
phol	2:s_LNv	0.627984	5.45647	0.0045	0.00259605	0.0239129	1.55699	0.273059	5.70203	HC_cycler	DD
CG15465	2:s_LNv	0.611482	0.987833	0.0142	0.00261404	0.0240303	19.99	12.4735	1.60259	HC_cycler	DD
CG30172	2:s_LNv	0.516866	18.4239	0.0412	0.00268743	0.0244108	2.3563	1.08508	2.17155	HC_cycler	DD
Lis-1	2:s_LNv	0.741001	3.38681	0.0042	0.00268743	0.0244108	4.79724	1.96082	2.44655	HC_cycler	DD
CG6123	2:s_LNv	0.742222	2.26359	0.0045	0.00274378	0.0247752	3.62402	1.31167	2.76291	HC_cycler	DD
CG4911	2:s_LNv	0.561026	5.43507	0.0007	0.00276272	0.0248971	3.4516	0.369091	9.35162	HC_cycler	DD
Ef1beta	2:s_LNv	0.582693	7.19236	0.014	0.00287935	0.0257455	1.88341	0.507591	3.71048	HC_cycler	DD
Ac13E	2:s_LNv	0.69492	0.399354	0.0027	0.00300054	0.0266211	5.29606	1.57118	3.37074	HC_cycler	DD
CaMKII	2:s_LNv	0.617507	18.308	0.0174	0.00306296	0.0270699	8.57852	3.96588	2.16308	HC_cycler	DD
CG43143	2:s_LNv	0.626178	5.07675	0.012	0.00330196	0.0287931	1.4894	0.391428	3.80504	HC_cycler	DD
Shaw	2:s_LNv	0.688152	17.6117	0.011	0.00337017	0.0292764	1.85234	0.429419	4.31359	HC_cycler	DD
Sec24AB	2:s_LNv	0.544109	5.1311	0.0284	0.00346306	0.0298567	1.57951	0.323456	4.88323	HC_cycler	DD
Act42A	2:s_LNv	0.525391	4.79915	0.0238	0.00351039	0.0302078	2.66794	0.774575	3.4444	HC_cycler	DD
Rab3-GEF	2:s_LNv	0.646599	6.42754	0.0011	0.00360685	0.0308638	4.13413	1.04846	3.94305	HC_cycler	DD
CG3409	2:s_LNv	0.538015	5.08774	0.0234	0.00368072	0.0314372	2.14653	0.367124	5.84689	HC_cycler	DD
CG43736	2:s_LNv	0.708898	10.2114	0.0034	0.00370576	0.0315334	2.61177	1.04646	2.49582	HC_cycler	DD
RpL8	2:s_LNv	0.569046	16.544	0.027	0.00383285	0.0324941	6.47025	4.01284	1.61239	HC_cycler	DD
CG7990	2:s_LNv	0.605043	3.4764	0.0185	0.00391117	0.0330967	2.99842	1.06249	2.82207	HC_cycler	DD
CG7337	2:s_LNv	0.588096	22.9713	0.0267	0.00404476	0.0338518	2.43402	0.80331	3.02998	HC_cycler	DD
CG34353	2:s_LNv	0.666333	15.7992	0.0034	0.00421076	0.0348587	3.53648	1.37247	2.57673	HC_cycler	DD
TM4SF	2:s_LNv	0.732405	21.9932	0.0046	0.00426747	0.0352009	2.07876	0.751522	2.76606	HC_cycler	DD
wap	2:s_LNv	0.550878	13.4357	0.0372	0.00429619	0.035374	1.87337	0.450508	4.15834	HC_cycler	DD
bnb	2:s_LNv	0.634941	7.43159	0.0011	0.00441247	0.0362012	3.33765	0.156644	21.3073	HC_cycler	DD
Eno	2:s_LNv	0.552162	8.63173	0.0093	0.00487483	0.0392905	11.399	5.47673	2.08136	HC_cycler	DD
eys	2:s_LNv	0.668201	19.2233	0.0063	0.00503878	0.0401873	2.33224	0.136985	17.0255	HC_cycler	DD
Pkd2	2:s_LNv	0.544169	6.98377	0.0178	0.00538183	0.0424793	1.0349	0	1.66	HC_cycler	DD
pod1	2:s_LNv	0.59023	12.0122	0.023	0.00541719	0.0426848	2.6334	0.962454	2.73613	HC_cycler	DD
l(3)05822	2:s_LNv	0.592455	2.31486	0.0207	0.00556122	0.0435946	0.871642	0.124328	7.01081	HC_cycler	DD
RpL24-like	2:s_LNv	0.787393	10.4096	0.0006	0.00556122	0.0435946	1.70782	0.637567	2.67866	HC_cycler	DD
shep	2:s_LNv	0.849194	0.834492	0.0005	0.00563455	0.0440939	20.3275	13.4757	1.50845	HC_cycler	DD
CG45057	2:s_LNv	0.636961	3.95538	0.0019	0.00567166	0.0442331	1.30467	0.300489	4.34182	HC_cycler	DD
UbcE2H	2:s_LNv	0.72025	14.08	0.0021	0.00574633	0.044437	1.89373	0.530395	3.57042	HC_cycler	DD
CG5823	2:s_LNv	0.531793	21.8107	0.0325	0.00609359	0.0467277	1.08298	0.23447	4.61884	HC_cycler	DD
CG14883	2:s_LNv	0.580973	13.6284	0.0205	0.00637717	0.0482557	5.6518	1.27238	4.44192	HC_cycler	DD
ND-AGGG	2:s_LNv	0.614313	20.065	0.0082	0.0065022	0.0490397	2.01551	0.796885	2.52923	HC_cycler	DD
CG10804	20:DN3	0.790384	5.41316	0.0006	1.74225e-07	0.000797603	11.0527	0.568833	19.4304	HC_cycler	DD
CG5347	20:DN3	0.683251	5.54051	0.0141	1.0493e-05	0.00480368	5.83983	0.208187	28.0508	HC_cycler	DD
bru-2	20:DN3	0.512421	4.59943	0.0477	1.17345e-05	0.0048837	6.06501	0.157419	38.5279	HC_cycler	DD
Ag5r	20:DN3	0.629166	5.83731	0.0172	1.38403e-05	0.00528008	10.4589	0.213421	49.0057	HC_cycler	DD
tim	20:DN3	0.629884	13.573	0.0041	1.63467e-05	0.00534536	20.8161	1.89934	10.9597	HC_cycler	DD
nAChRalpha3	20:DN3	0.539678	7.51861	0.0402	2.03223e-05	0.00620237	11.7324	1.86861	6.27869	HC_cycler	DD
CG42540	20:DN3	0.754719	14.652	0.006	4.73148e-05	0.0114004	4.95907	1.03919	4.77204	HC_cycler	DD
CG2865	20:DN3	0.51945	8.76725	0.0467	5.80807e-05	0.0115606	6.45728	0.554445	11.6464	HC_cycler	DD
CR44320	20:DN3	0.588545	16.7525	0.0127	5.80807e-05	0.0115606	2.264	0.0930787	24.3235	HC_cycler	DD
CG34355	20:DN3	0.62802	5.19945	0.0106	6.75444e-05	0.0123687	2.86261	0.201715	14.1913	HC_cycler	DD
kirre	20:DN3	0.681529	4.64304	0.0114	9.11991e-05	0.0154633	62.5877	16.5399	3.78404	HC_cycler	DD
dnc	20:DN3	0.622594	3.2554	0.0166	0.000111078	0.0169504	35.7925	12.8993	2.77476	HC_cycler	DD
ND-MLRQ	20:DN3	0.511019	21.7494	0.0083	0.00013497	0.018724	4.51755	0.60612	7.45323	HC_cycler	DD
CG9328	20:DN3	0.548504	17.7873	0.0266	0.000171807	0.0218481	2.81262	0.282094	9.97051	HC_cycler	DD
unc-13-4A	20:DN3	0.57039	11.9613	0.0067	0.000171807	0.0218481	1.93753	0.0513242	37.7509	HC_cycler	DD
oc	20:DN3	0.56012	5.88414	0.0004	0.000228124	0.0237352	5.41933	0.0868863	62.3727	HC_cycler	DD
14-3-3zeta	20:DN3	0.511961	23.2436	0.0272	0.000287512	0.0253121	81.3249	43.0444	1.88933	HC_cycler	DD
cwo	20:DN3	0.511931	14.194	0.0377	0.000274806	0.0253121	2.85057	0.157356	18.1154	HC_cycler	DD
jdp	20:DN3	0.555564	21.6088	0.0353	0.000413997	0.0338443	32.8627	7.08845	4.63609	HC_cycler	DD
vri	20:DN3	0.577982	15.2696	0.0231	0.00043344	0.0348121	6.5647	0.785045	8.3622	HC_cycler	DD
dpr10	20:DN3	0.614409	16.1497	0.0019	0.000474016	0.0361674	3.21871	0.345419	9.31827	HC_cycler	DD
CG15765	20:DN3	0.565575	16.2826	0.0311	0.000590928	0.0403772	4.94431	0.754134	6.55628	HC_cycler	DD
CG14431	20:DN3	0.610425	8.88743	0.0288	0.00073553	0.0431699	0.959712	0.0470157	20.4126	HC_cycler	DD
CG42684	20:DN3	0.512218	4.90958	0.0441	0.000703721	0.0431699	1.57021	0.0651631	24.0966	HC_cycler	DD
CR45185	20:DN3	0.667289	3.71162	0.0074	0.000703721	0.0431699	6.41239	0.177797	36.0659	HC_cycler	DD
CG14424	20:DN3	0.787237	6.85531	0.0029	0.000767339	0.0433688	2.5108	0	1.66	HC_cycler	DD
GCS2alpha	20:DN3	0.577523	10.9685	0.0272	0.000767339	0.0433688	12.1816	3.38651	3.59709	HC_cycler	DD
tacc	20:DN3	0.603801	5.94094	0.0219	0.000836265	0.0450402	4.31273	1.14455	3.76807	HC_cycler	DD
Vha16-1	20:DN3	0.542723	16.1153	0.0169	0.000836265	0.0450402	15.0311	7.54437	1.99236	HC_cycler	DD
CG14408	20:DN3	0.773054	9.37682	0.0033	0.000951294	0.0489328	6.42214	1.57887	4.06756	HC_cycler	DD
Drat	20:DN3	0.738287	18.2409	0.0037	0.000951294	0.0489328	4.51654	1.32126	3.41836	HC_cycler	DD
CG14509	20:DN3	0.539478	6.582	0.0179	0.000991684	0.0498893	6.31368	1.7809	3.54521	HC_cycler	DD
CG18769	20:DN3	0.573847	6.6961	0.0357	0.00103538	0.0498942	2.77148	0.464671	5.96439	HC_cycler	DD
CG5347	25:l_LNv	0.608124	5.98149	0.0262	1.27361e-06	0.0058306	5.24628	0.210923	24.873	HC_cycler	DD
Pxn	25:l_LNv	0.667952	18.5054	0.0126	8.51979e-06	0.0097509	3.75088	0.372606	10.0666	HC_cycler	DD
rst	25:l_LNv	0.573407	5.78621	0.0316	1.16242e-05	0.0106432	10.2044	1.07919	9.45565	HC_cycler	DD
ND-49	25:l_LNv	0.671654	20.2987	0.0091	2.85511e-05	0.014523	1.94636	0.476127	4.08789	HC_cycler	DD
TwdlY	25:l_LNv	0.518537	7.1302	0.0492	2.29701e-05	0.014523	3.86312	0	1.66	HC_cycler	DD
Pkcdelta	25:l_LNv	0.577789	4.20894	0.0099	3.81106e-05	0.017447	12.3088	0.508105	24.2249	HC_cycler	DD
CG31224	25:l_LNv	0.685308	3.38771	0.0088	7.67169e-05	0.0319282	12.4304	2.27227	5.47049	HC_cycler	DD
CG17777	3:DN1a	0.746837	23.8844	0.0046	4.65215e-12	2.12975e-08	31.0236	2.69584	11.508	HC_cycler	DD
CG4577	3:DN1a	0.631932	9.87409	0.013	9.67282e-11	1.10705e-07	14.5861	2.84775	5.12198	HC_cycler	DD
dpr9	3:DN1a	0.885319	21.1828	0.0003	7.6923e-11	1.10705e-07	12.54	3.25447	3.85315	HC_cycler	DD
CG15082	3:DN1a	0.758967	6.93873	0.0001	1.38738e-09	1.05857e-06	85.1684	16.0926	5.29238	HC_cycler	DD
tim	3:DN1a	0.700557	15.2834	0.0017	2.34252e-09	1.53201e-06	23.2331	3.46969	6.69602	HC_cycler	DD
nrv3	3:DN1a	0.763028	23.8467	0.0017	2.88173e-09	1.64907e-06	37.1733	22.1775	1.67617	HC_cycler	DD
bru-3	3:DN1a	0.842981	20.7028	0.0011	4.80899e-09	2.20156e-06	112.322	56.6489	1.98277	HC_cycler	DD
CG31224	3:DN1a	0.612689	4.84337	0.0215	1.84013e-08	7.6583e-06	10.0238	2.77475	3.61252	HC_cycler	DD
CG45263	3:DN1a	0.803067	18.108	0.0017	5.51452e-08	2.10379e-05	15.739	5.42056	2.90357	HC_cycler	DD
CG11030	3:DN1a	0.891849	17.3131	0.0001	1.15524e-07	3.77608e-05	5.88425	0.466573	12.6116	HC_cycler	DD
Scp2	3:DN1a	0.675958	13.8607	0.0003	1.23725e-07	3.77608e-05	2.30383	0.105787	21.7781	HC_cycler	DD
kirre	3:DN1a	0.687365	6.7658	0.0093	1.58688e-07	4.54045e-05	52.5702	13.6096	3.86273	HC_cycler	DD
Act5C	3:DN1a	0.722223	9.21085	0.003	3.09506e-07	8.33482e-05	18.3163	6.23011	2.93996	HC_cycler	DD
TwdlY	3:DN1a	0.691404	5.77047	0.0109	4.2035e-07	0.000106909	2.17034	0	1.66	HC_cycler	DD
CG6329	3:DN1a	0.60707	22.6424	0.0082	5.44921e-07	0.000124732	18.6128	7.0699	2.63268	HC_cycler	DD
CG42747	3:DN1a	0.683207	9.05253	0.0092	7.35231e-07	0.00016028	2.25962	0.173197	13.0465	HC_cycler	DD
vri	3:DN1a	0.888813	16.4166	0.0001	1.24467e-06	0.000247744	9.4542	1.59374	5.93207	HC_cycler	DD
NaCP60E	3:DN1a	0.789802	20.268	0.0025	1.3807e-06	0.000263368	7.35753	1.89525	3.88209	HC_cycler	DD
PI4KIIIalpha	3:DN1a	0.618063	9.83299	0.0146	2.40236e-06	0.000407333	4.40656	0.281351	15.6621	HC_cycler	DD
Cct1	3:DN1a	0.72703	11.0998	0.0037	3.96579e-06	0.000605179	4.83122	0.897714	5.38169	HC_cycler	DD
CG5347	3:DN1a	0.615944	6.46559	0.0252	3.96579e-06	0.000605179	4.40952	0.248201	17.766	HC_cycler	DD
Tbh	3:DN1a	0.639918	18.9002	0.0096	3.737e-06	0.000605179	12.2041	2.66736	4.57533	HC_cycler	DD
CCHa1	3:DN1a	0.51961	22.0596	0.0472	4.6456e-06	0.00068605	55.9621	21.7704	2.57056	HC_cycler	DD
CG32547	3:DN1a	0.669807	7.73356	0.0047	5.33161e-06	0.000731948	5.11689	0.894131	5.72276	HC_cycler	DD
Mnt	3:DN1a	0.589964	14.3787	0.0073	6.86704e-06	0.000898209	11.38	3.10721	3.66245	HC_cycler	DD
Pdp1	3:DN1a	0.658156	17.3544	0.018	7.1381e-06	0.000907728	119.915	42.5755	2.81653	HC_cycler	DD
Fer1HCH	3:DN1a	0.517731	17.2469	0.0465	8.99186e-06	0.00111256	12.2174	3.05572	3.99821	HC_cycler	DD
CG12484	3:DN1a	0.654329	6.77107	0.0049	9.89455e-06	0.00116147	4.33909	0.736227	5.89369	HC_cycler	DD
mspo	3:DN1a	0.800783	15.1241	0.0012	1.13e-05	0.00120306	3.69619	0.510408	7.24164	HC_cycler	DD
Ant2	3:DN1a	0.685794	2.33808	0.0098	1.70737e-05	0.0016992	30.1321	12.04	2.50267	HC_cycler	DD
dpr11	3:DN1a	0.764825	16.2014	0.0005	2.09283e-05	0.00199604	5.19106	0.496852	10.4479	HC_cycler	DD
CG2269	3:DN1a	0.557064	18.7571	0.0094	2.2111e-05	0.0020658	39.5111	21.91	1.80333	HC_cycler	DD
CG13300	3:DN1a	0.558069	5.26002	0.0361	2.55947e-05	0.0022101	1.97097	0.0962308	20.4817	HC_cycler	DD
Dop2R	3:DN1a	0.653282	16.9133	0.0127	2.90704e-05	0.00241954	8.07522	3.39577	2.37802	HC_cycler	DD
shakB	3:DN1a	0.726504	10.7575	0.0038	3.48146e-05	0.00270137	3.55112	1.19294	2.97679	HC_cycler	DD
CR15345	3:DN1a	0.82793	6.86583	0.0008	4.08867e-05	0.00311965	2.27499	0.273042	8.33201	HC_cycler	DD
CG15485	3:DN1a	0.683758	4.30107	0.001	4.88179e-05	0.00366374	1.43429	0	1.66	HC_cycler	DD
CG14408	3:DN1a	0.534465	9.69042	0.0277	5.14764e-05	0.00380095	6.97348	1.57225	4.43536	HC_cycler	DD
Ten-m	3:DN1a	0.853752	0.590929	0.0004	5.81956e-05	0.00422888	12.4135	3.52586	3.52069	HC_cycler	DD
Cam	3:DN1a	0.600019	19.0207	0.0224	6.24056e-05	0.00439527	109.584	65.789	1.66569	HC_cycler	DD
Ars2	3:DN1a	0.946932	14.3546	0.0001	8.23128e-05	0.00554159	2.91056	0.275889	10.5498	HC_cycler	DD
CG7708	3:DN1a	0.534682	7.46977	0.0419	8.66723e-05	0.00575052	3.47019	0.890714	3.89596	HC_cycler	DD
Rbp6	3:DN1a	0.600933	13.2745	0.0141	8.81571e-05	0.00576548	42.5242	25.8166	1.64717	HC_cycler	DD
EF2	3:DN1a	0.664681	20.2447	0.0087	0.00011186	0.00673808	12.1751	4.72056	2.57917	HC_cycler	DD
CG43736	3:DN1a	0.578762	9.35651	0.0265	0.000115702	0.006879	3.74404	1.0561	3.54515	HC_cycler	DD
Eip63F-1	3:DN1a	0.77393	22.4311	0.0026	0.000117685	0.00690721	4.60755	1.1109	4.1476	HC_cycler	DD
porin	3:DN1a	0.629222	2.69087	0.0066	0.000119669	0.00693471	8.05673	3.13307	2.57151	HC_cycler	DD
Hsp23	3:DN1a	0.624399	1.00086	0.0209	0.000141507	0.00799775	9.9092	1.57017	6.31093	HC_cycler	DD
Lpin	3:DN1a	0.654512	12.6186	0.0148	0.000151255	0.00824339	8.1045	2.48341	3.26345	HC_cycler	DD
CG14439	3:DN1a	0.729781	5.03309	0.0037	0.00018146	0.00907952	1.9239	0.40495	4.75095	HC_cycler	DD
CG15098	3:DN1a	0.646493	6.39599	0.0006	0.000184446	0.00907952	16.9948	2.30569	7.37081	HC_cycler	DD
lilli	3:DN1a	0.849979	15.3255	0.0003	0.00018146	0.00907952	3.09003	0.732297	4.21964	HC_cycler	DD
FBgn0285944	3:DN1a	0.653593	6.48139	0.0141	0.000190606	0.00928294	23.5353	12.736	1.84794	HC_cycler	DD
CG15628	3:DN1a	0.7178	13.1425	0.0041	0.000200237	0.0095488	5.81734	2.39957	2.42432	HC_cycler	DD
unc-13-4A	3:DN1a	0.563015	13.9434	0.0018	0.000210272	0.00962626	9.66223	3.02446	3.1947	HC_cycler	DD
CG14693	3:DN1a	0.571375	10.7412	0.021	0.000255482	0.0112461	3.0388	0	1.66	HC_cycler	DD
CG14424	3:DN1a	0.59076	6.97708	0.019	0.000272486	0.0117683	2.45522	0	1.66	HC_cycler	DD
rdx	3:DN1a	0.617249	15.5359	0.0107	0.000281382	0.012039	9.58073	2.47009	3.87869	HC_cycler	DD
CG3257	3:DN1a	0.522797	15.449	0.035	0.000300002	0.0124855	1.66805	0.132254	12.6125	HC_cycler	DD
CR42862	3:DN1a	0.643711	19.8769	0.013	0.000319777	0.0128416	27.7626	16.8869	1.64403	HC_cycler	DD
sdt	3:DN1a	0.651345	6.15914	0.0103	0.000335446	0.0132385	7.78524	2.81363	2.76697	HC_cycler	DD
Hipk	3:DN1a	0.722787	23.2151	0.0064	0.000399079	0.0148535	15.4516	7.32488	2.10947	HC_cycler	DD
ytr	3:DN1a	0.510324	14.2342	0.0122	0.000424928	0.0155626	3.98209	0.641044	6.21188	HC_cycler	DD
oc	3:DN1a	0.524937	6.44074	0.0009	0.000431682	0.0156844	3.18718	0.0861182	37.0094	HC_cycler	DD
Argk	3:DN1a	0.858371	2.63288	0.0006	0.000474041	0.0166936	4.26835	1.32447	3.22269	HC_cycler	DD
be	3:DN1a	0.548314	10.2057	0.0387	0.000481415	0.0166964	1.65723	0.0392288	42.2452	HC_cycler	DD
igl	3:DN1a	0.536324	6.78753	0.0021	0.000536612	0.0180633	12.2841	4.20381	2.92213	HC_cycler	DD
Tsp3A	3:DN1a	0.534616	8.1637	0.032	0.000588538	0.0192452	1.51621	0.0416214	36.4286	HC_cycler	DD
nmo	3:DN1a	0.725983	4.95663	0.0063	0.000597572	0.019402	12.4539	5.78726	2.15195	HC_cycler	DD
CG15534	3:DN1a	0.584179	8.93794	0.0245	0.000625734	0.0198931	3.06608	0.594307	5.15909	HC_cycler	DD
Dscam3	3:DN1a	0.567587	13.0907	0.0187	0.000654994	0.0205381	1.47631	0.0613828	24.0509	HC_cycler	DD
Ten-a	3:DN1a	0.617472	18.7933	0.0212	0.000696105	0.0216787	24.395	11.6891	2.08698	HC_cycler	DD
PMCA	3:DN1a	0.628531	15.3301	0.0042	0.000750975	0.0230736	3.6398	0.90992	4.00013	HC_cycler	DD
CG7407	3:DN1a	0.679365	12.0303	0.0086	0.000774003	0.0233117	1.32051	0.0326324	40.4661	HC_cycler	DD
Golgin245	3:DN1a	0.51119	13.3006	0.0456	0.00091283	0.0261183	1.32013	0	1.66	HC_cycler	DD
Dscam4	3:DN1a	0.805423	19.2287	0.0014	0.000940466	0.0264138	12.2671	4.72485	2.5963	HC_cycler	DD
CG13203	3:DN1a	0.504843	11.2906	0.0442	0.00102814	0.0281846	2.68745	0.0727654	36.9331	HC_cycler	DD
eys	3:DN1a	0.646766	19.6497	0.0071	0.00110709	0.0296388	8.00227	1.99118	4.01885	HC_cycler	DD
slgA	3:DN1a	0.59814	3.58408	0.0024	0.0011234	0.0297279	8.13579	2.71078	3.00128	HC_cycler	DD
CG14299	3:DN1a	0.566282	6.32703	0.0353	0.00119142	0.0311676	2.70261	0.271417	9.95744	HC_cycler	DD
CG13594	3:DN1a	0.708007	17.2675	0.0084	0.0013589	0.0341161	2.23623	0.608599	3.6744	HC_cycler	DD
CG12535	3:DN1a	0.601616	6.65264	0.015	0.00139895	0.0344322	2.0697	0.482259	4.29167	HC_cycler	DD
CG3764	3:DN1a	0.517002	14.7257	0.0307	0.00181228	0.04087	1.0918	0	1.66	HC_cycler	DD
CG12237	3:DN1a	0.586136	14.4474	0.0051	0.00183811	0.0412493	3.25921	1.17995	2.76215	HC_cycler	DD
NAA20	3:DN1a	0.581838	13.6006	0.0228	0.00186463	0.0414383	1.30464	0.144143	9.05099	HC_cycler	DD
His3.3B	3:DN1a	0.670676	7.53795	0.0082	0.00189115	0.0416236	93.7386	55.9856	1.67433	HC_cycler	DD
ics	3:DN1a	0.722887	13.5022	0.003	0.0021784	0.0457463	1.15295	0.0326324	35.3314	HC_cycler	DD
RpS8	3:DN1a	0.746867	20.3219	0.0027	0.0021784	0.0457463	4.62877	2.17327	2.12986	HC_cycler	DD
amon	4:DN1p	0.825198	21.2734	0.0018	1.84855e-14	8.46264e-11	32.2433	3.63872	8.86116	HC_cycler	DD
Clk	4:DN1p	0.637469	19.3335	0.0006	5.82483e-13	1.3333e-09	12.5737	0.04171	301.456	HC_cycler	DD
tim	4:DN1p	0.839794	9.83601	0.002	1.48109e-11	2.26014e-08	27.4537	2.62271	10.4677	HC_cycler	DD
CG31324	4:DN1p	0.680824	10.6621	0.0016	1.63006e-10	1.86561e-07	3.22153	0.0703037	45.8231	HC_cycler	DD
Argk	4:DN1p	0.595624	20.0177	0.0087	4.90886e-10	4.49455e-07	16.6757	1.04159	16.0098	HC_cycler	DD
fne	4:DN1p	0.843853	22.8433	0.001	9.30443e-10	5.74646e-07	57.2228	27.4939	2.08129	HC_cycler	DD
Rbp6	4:DN1p	0.889138	6.13279	0.0002	1.00419e-09	5.74646e-07	23.5438	8.8171	2.67024	HC_cycler	DD
kirre	4:DN1p	0.641987	6.47477	0.011	1.32435e-09	6.73652e-07	74.2157	10.5123	7.05991	HC_cycler	DD
nAChRalpha3	4:DN1p	0.598235	6.90372	0.0204	5.63136e-09	2.34367e-06	8.68603	1.02635	8.46306	HC_cycler	DD
Pdp1	4:DN1p	0.740129	9.61039	0.0043	7.32114e-09	2.79301e-06	164.422	61.5456	2.67155	HC_cycler	DD
CG43658	4:DN1p	0.622229	7.0241	0.0109	1.22998e-08	3.75389e-06	8.30863	1.33803	6.20959	HC_cycler	DD
CR42862	4:DN1p	0.831297	21.1949	0.0002	1.17373e-08	3.75389e-06	33.0769	10.1013	3.27453	HC_cycler	DD
vri	4:DN1p	0.560024	8.13686	0.0177	1.35039e-08	3.8638e-06	9.60442	1.3429	7.15201	HC_cycler	DD
CG14082	4:DN1p	0.795029	7.16049	0.0023	2.8217e-08	7.59869e-06	4.69696	0.392036	11.9809	HC_cycler	DD
jim	4:DN1p	0.744698	8.33727	0.0034	3.38301e-08	8.60413e-06	32.0971	9.25009	3.46993	HC_cycler	DD
nrv3	4:DN1p	0.660948	20.0356	0.0092	4.63476e-08	1.11673e-05	66.4465	32.5354	2.04228	HC_cycler	DD
His3.3B	4:DN1p	0.709056	6.01765	0.0067	7.54946e-08	1.64578e-05	92.8265	49.7188	1.86703	HC_cycler	DD
Eip63F-1	4:DN1p	0.738882	19.4602	0.0009	1.83393e-07	3.65033e-05	6.94342	0.3387	20.5002	HC_cycler	DD
CG2909	4:DN1p	0.589441	8.71798	0.016	3.44873e-07	6.57844e-05	2.6383	0.146255	18.039	HC_cycler	DD
CG14408	4:DN1p	0.679287	7.57239	0.0101	4.24287e-07	7.47072e-05	6.04693	0.787382	7.6798	HC_cycler	DD
CG15628	4:DN1p	0.625018	7.62169	0.002	6.39075e-07	0.000103625	15.1005	3.26414	4.62619	HC_cycler	DD
CG45002	4:DN1p	0.735491	8.39327	0.0013	6.79061e-07	0.000103625	7.86014	0.748275	10.5044	HC_cycler	DD
CG10804	4:DN1p	0.711987	6.95922	0.0012	1.14411e-06	0.000161932	9.26423	1.34111	6.9079	HC_cycler	DD
oc	4:DN1p	0.503925	6.41576	0.0008	1.21448e-06	0.000163527	5.27797	0.120335	43.8608	HC_cycler	DD
Tet	4:DN1p	0.833339	8.26282	0.0003	1.79928e-06	0.000226964	3.82282	0.829532	4.6084	HC_cycler	DD
CG42540	4:DN1p	0.52952	9.12101	0.0425	2.10194e-06	0.000253228	5.64751	0.889455	6.3494	HC_cycler	DD
Eip93F	4:DN1p	0.600372	22.2548	0.0237	2.97145e-06	0.000323888	25.1383	6.65042	3.77996	HC_cycler	DD
CG5347	4:DN1p	0.533561	5.72532	0.0291	3.20689e-06	0.000333662	4.25535	0.144397	29.4698	HC_cycler	DD
Moe	4:DN1p	0.614946	8.96873	0.0206	3.14586e-06	0.000333662	8.52038	2.98979	2.84982	HC_cycler	DD
CG32264	4:DN1p	0.714839	7.40127	0.0078	3.52577e-06	0.000358689	21.1202	8.7271	2.42007	HC_cycler	DD
blot	4:DN1p	0.597955	18.4107	0.0163	3.94939e-06	0.000384687	145.334	73.5448	1.97612	HC_cycler	DD
CG14424	4:DN1p	0.649578	5.62525	0.0002	4.42147e-06	0.000413092	4.05218	0	1.66	HC_cycler	DD
Act5C	4:DN1p	0.596898	9.52442	0.0232	5.74198e-06	0.000505515	20.5972	7.55049	2.72792	HC_cycler	DD
CG31224	4:DN1p	0.535377	5.85804	0.0403	5.63728e-06	0.000505515	11.4232	3.35695	3.40284	HC_cycler	DD
chn	4:DN1p	0.692261	21.3389	0.0083	9.59849e-06	0.000744778	9.38523	2.44189	3.84343	HC_cycler	DD
CG34353	4:DN1p	0.62162	7.05723	0.0012	1.3273e-05	0.000949432	6.61206	1.57299	4.20351	HC_cycler	DD
CG42784	4:DN1p	0.572328	12.3105	0.0291	1.55825e-05	0.00109749	12.3138	3.48646	3.53191	HC_cycler	DD
CG2701	4:DN1p	0.551317	5.75995	0.0364	1.61448e-05	0.00111986	2.34241	0.290056	8.0757	HC_cycler	DD
Drep3	4:DN1p	0.625355	7.16788	0.0085	1.9259e-05	0.0012778	3.75563	0.483887	7.76138	HC_cycler	DD
Pde11	4:DN1p	0.559649	22.2592	0.0226	2.25409e-05	0.00145341	4.81291	1.15094	4.18171	HC_cycler	DD
CG11300	4:DN1p	0.647455	20.3911	0.0048	2.37531e-05	0.00148961	1.59851	0	1.66	HC_cycler	DD
CG9522	4:DN1p	0.571283	8.87714	0.0199	3.24075e-05	0.00197816	1.16278	0	1.66	HC_cycler	DD
Rbp	4:DN1p	0.65562	17.5591	0.0096	3.59063e-05	0.00208975	7.06828	2.15031	3.2871	HC_cycler	DD
unc-13	4:DN1p	0.530409	20.2781	0.048	3.65182e-05	0.00208975	22.76	12.2521	1.85764	HC_cycler	DD
CR15345	4:DN1p	0.613282	6.60603	0.0022	3.77823e-05	0.0021354	3.74387	0.52618	7.11519	HC_cycler	DD
CG7781	4:DN1p	0.573962	19.3139	0.0133	4.11327e-05	0.00226874	5.85531	1.48756	3.93618	HC_cycler	DD
fs(1)h	4:DN1p	0.745768	4.4578	0.0016	4.1829e-05	0.00227968	15.8882	7.03812	2.25745	HC_cycler	DD
SK	4:DN1p	0.64859	7.07782	0.0131	4.4752e-05	0.00238226	20.7787	8.10483	2.56374	HC_cycler	DD
scrib	4:DN1p	0.77967	5.09187	0.0013	5.20609e-05	0.00261906	4.61315	0.330867	13.9426	HC_cycler	DD
Atpalpha	4:DN1p	0.622918	21.3666	0.0185	6.04777e-05	0.00294539	92.8448	49.5185	1.87495	HC_cycler	DD
Trpm	4:DN1p	0.568548	6.52429	0.0277	0.000110725	0.00496962	3.19136	0.324946	9.8212	HC_cycler	DD
CG7705	4:DN1p	0.607422	5.99324	0.0018	0.000142966	0.00611681	5.26691	0.447334	11.774	HC_cycler	DD
scrt	4:DN1p	0.562975	21.1814	0.0307	0.00014757	0.00625533	24.4949	5.93578	4.12665	HC_cycler	DD
CG13203	4:DN1p	0.579971	10.4577	0.0211	0.000152314	0.00639718	2.27333	0	1.66	HC_cycler	DD
dpr13	4:DN1p	0.760797	9.87185	0.0026	0.000159682	0.00652699	6.74784	2.36554	2.85255	HC_cycler	DD
tacc	4:DN1p	0.696564	6.21096	0.0087	0.000170057	0.00688956	3.99242	1.13895	3.50534	HC_cycler	DD
CG2685	4:DN1p	0.603074	9.5695	0.0237	0.000183943	0.00732254	1.67665	0.128595	13.0382	HC_cycler	DD
Klp3A	4:DN1p	0.586779	6.59342	0.0001	0.000201992	0.00783661	4.36272	0	1.66	HC_cycler	DD
CG32369	4:DN1p	0.578791	18.9231	0.0167	0.000208371	0.00801616	3.00281	0.187644	16.0027	HC_cycler	DD
Fur1	4:DN1p	0.582728	9.15254	0.0185	0.000211607	0.00807282	3.18032	0.818441	3.88583	HC_cycler	DD
Ant2	4:DN1p	0.564448	19.8866	0.03	0.0002322	0.00850408	34.1978	13.8679	2.46597	HC_cycler	DD
Df31	4:DN1p	0.596428	2.89684	0.0086	0.0002322	0.00850408	13.3409	4.10821	3.24738	HC_cycler	DD
CG13185	4:DN1p	0.549871	8.76591	0.0367	0.000292285	0.0103727	2.23455	0	1.66	HC_cycler	DD
AstC	4:DN1p	0.612706	5.68453	0.0029	0.000345284	0.0119751	38.6181	9.88842	3.90539	HC_cycler	DD
Sh	4:DN1p	0.570375	23.8014	0.0212	0.000389403	0.013108	46.7173	22.1076	2.11318	HC_cycler	DD
CG14304	4:DN1p	0.53699	6.53688	0.0388	0.00045882	0.0151113	7.08479	0	1.66	HC_cycler	DD
Rab11	4:DN1p	0.737353	20.722	0.0055	0.000563952	0.0172118	5.13412	1.15372	4.45005	HC_cycler	DD
Prosap	4:DN1p	0.673887	6.71676	0.0017	0.000589185	0.0177453	3.29687	0.778	4.23762	HC_cycler	DD
CG6044	4:DN1p	0.613186	3.73663	0.0128	0.000597909	0.0178904	3.48608	0.833109	4.18442	HC_cycler	DD
Ptp4E	4:DN1p	0.543417	6.11512	0.031	0.000633775	0.0187189	2.08845	0.114129	18.299	HC_cycler	DD
Mnt	4:DN1p	0.550201	10.2217	0.0328	0.000661923	0.0194249	7.11315	2.5518	2.78751	HC_cycler	DD
CG15485	4:DN1p	0.66942	6.26589	0.0028	0.000671651	0.0195848	1.65184	0.136986	12.0585	HC_cycler	DD
CG14883	4:DN1p	0.557151	11.2812	0.0268	0.000753851	0.0210435	5.60004	0.79418	7.05135	HC_cycler	DD
CG10326	4:DN1p	0.511298	23.3967	0.034	0.00089498	0.0242439	2.79382	0.278739	10.0231	HC_cycler	DD
HmgD	4:DN1p	0.661861	11.6497	0.0067	0.000920778	0.024651	2.26589	0.825522	2.7448	HC_cycler	DD
ben	4:DN1p	0.593391	6.22715	0.0299	0.00094727	0.024923	6.86872	2.82079	2.43503	HC_cycler	DD
nvy	4:DN1p	0.588278	7.27238	0.0021	0.000974473	0.0253474	1.62897	0.0802826	20.2905	HC_cycler	DD
CG2662	4:DN1p	0.514677	8.9265	0.014	0.00101656	0.0262926	1.15505	0.0428493	26.9561	HC_cycler	DD
msn	4:DN1p	0.623507	11.0341	0.0173	0.00103108	0.0265186	5.63924	1.36841	4.12102	HC_cycler	DD
dikar	4:DN1p	0.571485	7.08789	0.0283	0.00113751	0.0289306	3.24098	1.5713	2.06261	HC_cycler	DD
PIP82	4:DN1p	0.514105	7.61443	0.0437	0.00118634	0.029841	2.21871	0	1.66	HC_cycler	DD
tna	4:DN1p	0.559003	22.5147	0.0303	0.0012369	0.0307746	8.03022	1.49614	5.36728	HC_cycler	DD
Eip75B	4:DN1p	0.665289	8.17891	0.0035	0.00125435	0.03104	11.1129	5.32309	2.08768	HC_cycler	DD
CG18208	4:DN1p	0.624587	6.69423	0.0197	0.00132598	0.0324616	7.2478	2.29012	3.16481	HC_cycler	DD
CG13054	4:DN1p	0.651107	7.31344	0.0027	0.00138206	0.0333003	6.8265	1.98353	3.44158	HC_cycler	DD
CG45057	4:DN1p	0.545848	18.8459	0.0048	0.00174494	0.0399416	2.08989	0.283034	7.38387	HC_cycler	DD
Calx	4:DN1p	0.504517	8.56449	0.0437	0.00191845	0.0434786	2.55274	0.848491	3.00856	HC_cycler	DD
CG14439	4:DN1p	0.540108	3.9411	0.037	0.00216556	0.0472092	1.78199	0	1.66	HC_cycler	DD
CG44422	4:DN1p	0.517155	9.46315	0.0459	0.00216556	0.0472092	3.17116	0.394624	8.03589	HC_cycler	DD
tim	5:LNd_Trissin	0.839948	16.1217	0.0002	3.30979e-16	1.51522e-12	37.7944	1.26803	29.8057	HC_cycler	DD
vri	5:LNd_Trissin	0.863051	17.3533	0.0001	4.33661e-14	9.9265e-11	10.2008	0.33124	30.7957	HC_cycler	DD
Cbp53E	5:LNd_Trissin	0.720725	18.6309	0.0052	3.42705e-13	3.92226e-10	10.6599	0.869304	12.2626	HC_cycler	DD
fne	5:LNd_Trissin	0.78382	4.24817	0.0035	3.42705e-13	3.92226e-10	63.6433	17.1966	3.70093	HC_cycler	DD
CG15628	5:LNd_Trissin	0.792524	16.8228	0.0001	7.58721e-13	6.94685e-10	69.7124	5.2051	13.3931	HC_cycler	DD
CG10804	5:LNd_Trissin	0.738126	5.27821	0.0029	4.85932e-12	3.0921e-09	12.3138	0.527864	23.3276	HC_cycler	DD
nmo	5:LNd_Trissin	0.75529	4.50694	0.0023	5.40341e-12	3.0921e-09	22.9685	4.03161	5.69711	HC_cycler	DD
Pka-R2	5:LNd_Trissin	0.711924	17.4211	0.0002	4.85932e-12	3.0921e-09	29.9037	1.89619	15.7705	HC_cycler	DD
Pdp1	5:LNd_Trissin	0.891163	18.7646	0.0009	6.67446e-12	3.39508e-09	161.238	36.8291	4.37801	HC_cycler	DD
Hsp23	5:LNd_Trissin	0.937773	5.01953	0.0002	1.5335e-11	7.02035e-09	22.2376	1.52616	14.571	HC_cycler	DD
CG14082	5:LNd_Trissin	0.88501	16.8678	0.0001	4.21446e-11	1.75398e-08	7.12958	0.046396	153.668	HC_cycler	DD
CG4341	5:LNd_Trissin	0.968308	6.24971	0.0001	1.81297e-10	6.91649e-08	18.1773	2.68536	6.76902	HC_cycler	DD
CG14509	5:LNd_Trissin	0.755814	17.5736	0.0024	6.67029e-10	2.34897e-07	20.1762	1.96442	10.2708	HC_cycler	DD
Dscam2	5:LNd_Trissin	0.814945	5.32314	0.001	9.16844e-10	2.99808e-07	6.55541	0.77713	8.43541	HC_cycler	DD
Argk	5:LNd_Trissin	0.891373	6.0724	0.0004	9.49173e-09	2.55607e-06	15.942	1.86351	8.55479	HC_cycler	DD
FBgn0284408	5:LNd_Trissin	0.786824	3.55646	0.0002	9.09747e-09	2.55607e-06	21.8516	2.29578	9.51816	HC_cycler	DD
A2bp1	5:LNd_Trissin	0.832202	16.5416	0.0014	4.40708e-08	1.12087e-05	9.45323	2.07027	4.56619	HC_cycler	DD
CG17777	5:LNd_Trissin	0.747205	3.23741	0.001	5.35553e-08	1.2904e-05	22.0633	2.52646	8.73291	HC_cycler	DD
dpr10	5:LNd_Trissin	0.924458	18.4591	0.0001	1.4476e-07	3.31355e-05	4.24038	0.018132	233.862	HC_cycler	DD
CG43737	5:LNd_Trissin	0.767175	4.7813	0.0001	1.95078e-07	4.05939e-05	15.9497	2.62724	6.07092	HC_cycler	DD
sif	5:LNd_Trissin	0.781966	4.42268	0.0012	1.95078e-07	4.05939e-05	36.8224	13.3597	2.75622	HC_cycler	DD
CG13868	5:LNd_Trissin	0.56764	16.587	0.0207	2.81846e-07	5.60996e-05	4.72193	0.655569	7.20279	HC_cycler	DD
Mur2B	5:LNd_Trissin	0.524922	5.55034	0.0376	3.14607e-07	6.00113e-05	11.335	1.18041	9.60264	HC_cycler	DD
amon	5:LNd_Trissin	0.55981	18.8052	0.0385	3.5056e-07	6.38957e-05	21.8134	3.73827	5.83515	HC_cycler	DD
Hr4	5:LNd_Trissin	0.589014	5.35285	0.0216	3.63701e-07	6.38957e-05	15.7596	1.07311	14.6859	HC_cycler	DD
Tbh	5:LNd_Trissin	0.6207	3.40167	0.0145	3.76842e-07	6.38957e-05	24.079	5.45804	4.41165	HC_cycler	DD
His3.3B	5:LNd_Trissin	0.701167	6.33755	0.0083	4.35185e-07	7.11527e-05	103.472	41.6957	2.48161	HC_cycler	DD
2mit	5:LNd_Trissin	0.744098	18.2074	0.0016	5.39202e-07	8.51196e-05	11.0949	1.6257	6.82472	HC_cycler	DD
bru-2	5:LNd_Trissin	0.737305	4.74244	0.0051	1.05034e-06	0.000150265	2.38965	0.0466331	51.2437	HC_cycler	DD
Capr	5:LNd_Trissin	0.517686	4.37326	0.0318	1.12542e-06	0.000156126	4.41525	0.260591	16.9432	HC_cycler	DD
DopEcR	5:LNd_Trissin	0.8291	19.0843	0.0009	1.29125e-06	0.000173862	8.13503	1.44692	5.62229	HC_cycler	DD
wry	5:LNd_Trissin	0.680954	5.25816	0.0007	2.00607e-06	0.000262394	11.5285	1.04443	11.0381	HC_cycler	DD
tna	5:LNd_Trissin	0.647131	3.21131	0.0059	2.29377e-06	0.000291691	5.07791	0.967945	5.24607	HC_cycler	DD
kuz	5:LNd_Trissin	0.566574	2.7079	0.0125	2.45201e-06	0.000303387	3.57658	0.878656	4.07051	HC_cycler	DD
tacc	5:LNd_Trissin	0.729389	5.77154	0.0046	2.53633e-06	0.000305561	4.37077	0.789816	5.53391	HC_cycler	DD
CG32369	5:LNd_Trissin	0.612795	2.98448	0.0093	2.99171e-06	0.00033405	1.66727	0.0965916	17.2611	HC_cycler	DD
Trpm	5:LNd_Trissin	0.878869	18.8902	0.0002	3.09364e-06	0.000337207	6.56183	0.458758	14.3035	HC_cycler	DD
sdt	5:LNd_Trissin	0.681979	5.11267	0.0093	3.19556e-06	0.000340216	6.29281	1.48018	4.25139	HC_cycler	DD
CG31808	5:LNd_Trissin	0.684303	3.65244	0.0026	3.64373e-06	0.000379113	3.65176	0.707019	5.165	HC_cycler	DD
TkR86C	5:LNd_Trissin	0.555526	15.8223	0.0051	4.57816e-06	0.000465752	5.02237	0.119064	42.182	HC_cycler	DD
lawc	5:LNd_Trissin	0.564302	6.73995	0.0332	5.92218e-06	0.000564828	17.5114	2.99575	5.84541	HC_cycler	DD
mgl	5:LNd_Trissin	0.742055	4.22433	0.0027	6.94165e-06	0.000648548	21.0502	4.07321	5.16797	HC_cycler	DD
aret	5:LNd_Trissin	0.529397	5.78627	0.0468	8.66294e-06	0.000777626	7.29726	0.376868	19.3629	HC_cycler	DD
CG13229	5:LNd_Trissin	0.77091	0.401083	0.0007	9.22373e-06	0.000812043	4.10315	0.0863252	47.5313	HC_cycler	DD
PVRAP	5:LNd_Trissin	0.657025	15.8459	0.0032	1.18319e-05	0.001022	4.85381	0.408869	11.8713	HC_cycler	DD
nrv1	5:LNd_Trissin	0.563757	3.38254	0.0097	1.25859e-05	0.00106701	2.57519	0.215383	11.9563	HC_cycler	DD
tutl	5:LNd_Trissin	0.676807	18.8822	0.0169	1.37971e-05	0.00112791	11.9581	4.59816	2.60063	HC_cycler	DD
nrv3	5:LNd_Trissin	0.721758	1.93982	0.0021	1.46696e-05	0.0011782	43.0187	22.0375	1.95207	HC_cycler	DD
CG42747	5:LNd_Trissin	0.810287	6.17468	0.0046	2.04948e-05	0.00146602	1.92176	0.0381628	50.3568	HC_cycler	DD
CG43658	5:LNd_Trissin	0.659922	16.6303	0.0036	1.9878e-05	0.00146602	5.14443	0.661778	7.77365	HC_cycler	DD
Drat	5:LNd_Trissin	0.68326	16.929	0.003	1.9878e-05	0.00146602	7.14042	2.29694	3.10866	HC_cycler	DD
Mapmodulin	5:LNd_Trissin	0.721268	4.53807	0.0056	1.92954e-05	0.00146602	7.37552	1.95291	3.77668	HC_cycler	DD
Scp2	5:LNd_Trissin	0.566341	14.2937	0.0004	2.04948e-05	0.00146602	2.02766	0.0731663	27.713	HC_cycler	DD
Rab26	5:LNd_Trissin	0.63606	14.4022	0.0095	2.17647e-05	0.00150968	3.79564	0.475325	7.98536	HC_cycler	DD
CG14408	5:LNd_Trissin	0.588804	7.29323	0.0281	2.31091e-05	0.00157901	5.05637	0.991495	5.09975	HC_cycler	DD
CG32052	5:LNd_Trissin	0.538303	5.78458	0.0275	2.45321e-05	0.00165159	5.77457	1.05089	5.49494	HC_cycler	DD
CG5347	5:LNd_Trissin	0.636656	5.65066	0.0152	2.6038e-05	0.00172756	4.64024	0.285315	16.2636	HC_cycler	DD
CG34353	5:LNd_Trissin	0.606528	16.4048	0.0136	2.76312e-05	0.00180708	4.19091	0.482168	8.6918	HC_cycler	DD
Mnt	5:LNd_Trissin	0.731809	16.0759	0.005	3.20156e-05	0.00203566	6.65066	1.4533	4.57626	HC_cycler	DD
PK2-R1	5:LNd_Trissin	0.866069	5.30397	0.0001	3.20156e-05	0.00203566	2.03656	0.0450623	45.1942	HC_cycler	DD
CG42613	5:LNd_Trissin	0.650497	18.1524	0.0086	3.39532e-05	0.00210051	18.4102	6.06223	3.03686	HC_cycler	DD
dally	5:LNd_Trissin	0.504406	17.9484	0.0486	3.39532e-05	0.00210051	3.47094	0.170284	20.3833	HC_cycler	DD
ND-15	5:LNd_Trissin	0.543844	2.78201	0.0378	3.60017e-05	0.00219754	4.63665	1.13264	4.09366	HC_cycler	DD
toy	5:LNd_Trissin	0.662835	17.6922	0.0094	4.41499e-05	0.00259126	9.39119	1.82992	5.13202	HC_cycler	DD
CG32698	5:LNd_Trissin	0.60507	6.09099	0.0003	4.95491e-05	0.00287134	2.8664	0.276476	10.3676	HC_cycler	DD
rut	5:LNd_Trissin	0.535584	4.76793	0.0358	5.24776e-05	0.00296595	12.9247	1.77124	7.29697	HC_cycler	DD
per	5:LNd_Trissin	0.743639	15.3712	0.0046	5.55693e-05	0.00306501	2.10354	0.226872	9.27191	HC_cycler	DD
CG15236	5:LNd_Trissin	0.634652	5.50868	0.0014	7.58657e-05	0.00399211	3.14323	0.0616539	50.9819	HC_cycler	DD
CG1695	5:LNd_Trissin	0.765027	2.33441	0.0004	7.80549e-05	0.004015	4.49956	0.855647	5.25866	HC_cycler	DD
Unc-76	5:LNd_Trissin	0.843983	4.88641	0.0001	9.22914e-05	0.0045925	3.44932	0.646508	5.33531	HC_cycler	DD
CG6330	5:LNd_Trissin	0.677313	3.76144	0.0115	0.000111954	0.00528379	1.30479	0.214299	6.08865	HC_cycler	DD
CG8958	5:LNd_Trissin	0.889248	4.15597	0.0002	0.000111954	0.00528379	1.12096	0.0396566	28.2667	HC_cycler	DD
CR45185	5:LNd_Trissin	0.50727	4.43059	0.0443	0.000118273	0.00546921	5.2587	0.27123	19.3883	HC_cycler	DD
CG5830	5:LNd_Trissin	0.693442	20.4371	0.0086	0.000128429	0.00587946	8.82853	2.13376	4.13754	HC_cycler	DD
Dop1R1	5:LNd_Trissin	0.758817	4.35563	0.0021	0.000139306	0.00619166	7.61477	2.3467	3.24488	HC_cycler	DD
SK	5:LNd_Trissin	0.620398	16.956	0.0041	0.000147067	0.00647378	31.3593	8.15502	3.84539	HC_cycler	DD
Lpin	5:LNd_Trissin	0.582109	5.14102	0.0159	0.000151151	0.00659017	4.84356	1.51859	3.18951	HC_cycler	DD
CG6123	5:LNd_Trissin	0.514609	4.28587	0.0122	0.000159531	0.00682555	2.47144	0.492621	5.01692	HC_cycler	DD
CG13300	5:LNd_Trissin	0.540117	3.38962	0.0315	0.000163828	0.00688078	2.24113	0.13778	16.266	HC_cycler	DD
PyK	5:LNd_Trissin	0.876762	3.92358	0.0004	0.000163828	0.00688078	4.18872	0.934222	4.48365	HC_cycler	DD
Btk29A	5:LNd_Trissin	0.616494	18.343	0.0143	0.000177622	0.0073257	5.44525	0.897888	6.06452	HC_cycler	DD
msi	5:LNd_Trissin	0.667267	18.4217	0.0113	0.000192375	0.00786331	16.5134	3.46907	4.76019	HC_cycler	DD
CG11768	5:LNd_Trissin	0.706804	17.958	0.0044	0.000197631	0.00793644	3.44169	0.103931	33.115	HC_cycler	DD
oc	5:LNd_Trissin	0.660894	5.70455	0.0017	0.000197631	0.00793644	2.7639	0	1.66	HC_cycler	DD
Pdfr	5:LNd_Trissin	0.579728	2.25365	0.0286	0.000202887	0.00807668	12.5469	3.65871	3.42932	HC_cycler	DD
CG8861	5:LNd_Trissin	0.624075	1.77061	0.0086	0.000208413	0.00822513	6.1063	1.4698	4.15451	HC_cycler	DD
fs(1)h	5:LNd_Trissin	0.553821	3.9633	0.0226	0.000225554	0.00875074	15.2708	5.79664	2.63442	HC_cycler	DD
uzip	5:LNd_Trissin	0.581399	1.83873	0.0241	0.000225554	0.00875074	2.7291	0.678603	4.02165	HC_cycler	DD
CG43901	5:LNd_Trissin	0.649579	5.36879	0.0121	0.000231658	0.00891201	7.32592	1.89017	3.87581	HC_cycler	DD
CG11190	5:LNd_Trissin	0.700819	5.31306	0.0086	0.000250587	0.00940316	7.3919	0.897005	8.24064	HC_cycler	DD
chn	5:LNd_Trissin	0.574207	3.031	0.0254	0.000250587	0.00940316	6.42387	1.77314	3.62288	HC_cycler	DD
CG17839	5:LNd_Trissin	0.606692	0.305863	0.0134	0.00026406	0.00982819	6.53711	0.725101	9.01546	HC_cycler	DD
Fkbp14	5:LNd_Trissin	0.555778	16.8328	0.0099	0.000293074	0.0106484	5.19825	0.286798	18.1251	HC_cycler	DD
Pde6	5:LNd_Trissin	0.588336	14.3066	0.0054	0.000342256	0.0120527	2.65777	0.133649	19.8861	HC_cycler	DD
CG32795	5:LNd_Trissin	0.704081	4.1007	0.0046	0.00041994	0.0145643	2.59767	0.574554	4.52119	HC_cycler	DD
CG3655	5:LNd_Trissin	0.590405	5.51255	0.0272	0.000430867	0.0148309	0.920569	0.0623152	14.7728	HC_cycler	DD
Pal2	5:LNd_Trissin	0.631108	18.1538	0.0158	0.000441793	0.0150935	17.7469	5.17549	3.42903	HC_cycler	DD
Atpalpha	5:LNd_Trissin	0.605464	4.67366	0.0226	0.000464708	0.0154162	68.8837	42.1646	1.63368	HC_cycler	DD
CG14424	5:LNd_Trissin	0.8758	6.42992	0.0002	0.000464708	0.0154162	2.33102	0	1.66	HC_cycler	DD
sano	5:LNd_Trissin	0.536544	4.50773	0.0198	0.00054031	0.0175428	1.28128	0	1.66	HC_cycler	DD
sNPF	5:LNd_Trissin	0.753257	1.61506	0.0029	0.000727248	0.0221956	28.8415	9.14034	3.15541	HC_cycler	DD
CG9328	5:LNd_Trissin	0.503798	5.99649	0.0481	0.000821926	0.0245933	3.64256	0.856176	4.25445	HC_cycler	DD
CG43427	5:LNd_Trissin	0.666353	3.58915	0.013	0.000841913	0.0250278	3.06422	0.656883	4.6648	HC_cycler	DD
NK7.1	5:LNd_Trissin	0.783091	0.547502	0.0012	0.000927499	0.0265381	2.54976	0.347733	7.33253	HC_cycler	DD
Fbl6	5:LNd_Trissin	0.778257	3.65484	0.0009	0.000950384	0.0268572	0.947033	0.0655342	14.451	HC_cycler	DD
HDAC4	5:LNd_Trissin	0.607293	20.1897	0.0173	0.00097327	0.0273352	5.72489	1.91151	2.99495	HC_cycler	DD
beat-IIIc	5:LNd_Trissin	0.568574	6.42035	0.0281	0.00104617	0.0286788	2.80169	0.233915	11.9774	HC_cycler	DD
ATPsynC	5:LNd_Trissin	0.653215	5.15567	0.0136	0.0010712	0.0290174	10.082	4.17633	2.41409	HC_cycler	DD
CG11566	5:LNd_Trissin	0.710657	19.0506	0.006	0.00109736	0.0293785	1.408	0	1.66	HC_cycler	DD
fok	5:LNd_Trissin	0.65314	22.1174	0.0057	0.00112353	0.0297313	3.42062	0.212733	16.0794	HC_cycler	DD
CG15765	5:LNd_Trissin	0.500502	10.8041	0.0345	0.00132638	0.0333635	4.6513	0.878529	5.29441	HC_cycler	DD
pan	5:LNd_Trissin	0.618655	19.6185	0.0247	0.00145687	0.0362475	6.71322	2.02937	3.30803	HC_cycler	DD
CG5916	5:LNd_Trissin	0.572774	6.88271	0.0087	0.00149093	0.0368944	2.65987	0.251724	10.5666	HC_cycler	DD
htl	5:LNd_Trissin	0.722828	6.3293	0.0034	0.00159921	0.0389424	1.70988	0.0243096	70.3378	HC_cycler	DD
Pdi	5:LNd_Trissin	0.613848	6.32932	0.003	0.00163635	0.039636	16.2519	4.30814	3.77238	HC_cycler	DD
CG15485	5:LNd_Trissin	0.6865	4.22752	0.0097	0.00167512	0.0399412	1.42529	0.0942385	15.1243	HC_cycler	DD
Fur2	5:LNd_Trissin	0.525157	5.01979	0.0166	0.0017139	0.040237	1.33795	0.1725	7.75623	HC_cycler	DD
CG42339	5:LNd_Trissin	0.53513	4.20965	0.0036	0.00175437	0.0407691	5.52475	0.302934	18.2375	HC_cycler	DD
CG33695	5:LNd_Trissin	0.58178	5.07878	0.0227	0.00183709	0.0422622	1.74504	0	1.66	HC_cycler	DD
CG11319	5:LNd_Trissin	0.702887	18.6871	0.0105	0.00205946	0.0466743	3.92199	0.477056	8.22123	HC_cycler	DD
FBgn0284408	6:DN1p	0.551773	3.5335	0.0237	2.00195e-08	3.98445e-05	29.1905	1.61481	18.0768	HC_cycler	DD
CG32052	6:DN1p	0.645474	21.7881	0.0174	6.48784e-08	7.42533e-05	10.6114	1.87289	5.66577	HC_cycler	DD
CG5347	6:DN1p	0.557824	7.0594	0.0317	3.15847e-07	0.000180744	5.19663	0.453825	11.4507	HC_cycler	DD
Argk	6:DN1p	0.746978	23.0941	0.0033	1.05272e-06	0.000401612	17.6354	4.47303	3.9426	HC_cycler	DD
beat-Ia	6:DN1p	0.635488	21.0613	0.0116	2.66187e-06	0.000782601	10.0885	3.15491	3.19772	HC_cycler	DD
Hers	6:DN1p	0.513228	9.85472	0.0237	3.69573e-06	0.000995238	7.03545	1.73431	4.05662	HC_cycler	DD
blot	6:DN1p	0.664029	18.2146	0.0077	5.24352e-06	0.00126341	203.599	95.7463	2.12644	HC_cycler	DD
rdgA	6:DN1p	0.524666	6.86007	0.0423	8.6646e-06	0.00180302	7.71572	1.53447	5.02827	HC_cycler	DD
CG5953	6:DN1p	0.724983	4.33422	0.0034	1.15217e-05	0.00210985	2.43774	0.129993	18.7529	HC_cycler	DD
CG2269	6:DN1p	0.600695	18.1337	0.0223	1.34401e-05	0.00227884	61.8399	29.4683	2.09852	HC_cycler	DD
CG9813	6:DN1p	0.771361	19.5046	0.0029	1.52721e-05	0.00243295	6.04915	1.22129	4.95307	HC_cycler	DD
EF2	6:DN1p	0.60017	18.848	0.0262	1.64748e-05	0.00243295	18.2032	5.73793	3.17242	HC_cycler	DD
nAChRalpha3	6:DN1p	0.560809	8.1924	0.0334	1.64748e-05	0.00243295	17.6807	6.61452	2.67301	HC_cycler	DD
Clk	6:DN1p	0.542409	21.5027	0.0214	1.86969e-05	0.00251748	4.16611	0.336214	12.3913	HC_cycler	DD
tim	6:DN1p	0.595587	12.3677	0.015	2.01544e-05	0.00263619	27.7577	5.88747	4.71471	HC_cycler	DD
dpr9	6:DN1p	0.754072	21.0033	0.0029	3.07385e-05	0.00360473	8.28802	1.60558	5.162	HC_cycler	DD
bru-3	6:DN1p	0.536079	20.3741	0.018	4.01834e-05	0.0041809	109.181	62.1519	1.75669	HC_cycler	DD
CG13054	6:DN1p	0.722497	9.18589	0.0065	4.64424e-05	0.00433905	8.66229	2.83487	3.05562	HC_cycler	DD
CG32547	6:DN1p	0.598959	6.90732	0.019	4.64424e-05	0.00433905	1.44013	0.226925	6.34627	HC_cycler	DD
CG14424	6:DN1p	0.565759	7.75947	0.0248	5.6235e-05	0.00504792	3.16735	0.0600547	52.7411	HC_cycler	DD
CG16854	6:DN1p	0.88086	4.50955	0.0004	6.18359e-05	0.00544393	1.36788	0	1.66	HC_cycler	DD
CG12239	6:DN1p	0.603712	11.5973	0.0182	0.000145555	0.00965724	100.003	2.26704	44.1116	HC_cycler	DD
Scp2	6:DN1p	0.761872	13.0822	0.0065	0.000155703	0.010183	1.65798	0.118083	14.0408	HC_cycler	DD
CG42541	6:DN1p	0.777571	5.56391	0.0046	0.000170329	0.0106817	2.52096	0.251544	10.0219	HC_cycler	DD
Tbh	6:DN1p	0.77454	20.0161	0.0039	0.000186244	0.011073	17.0711	6.87698	2.48235	HC_cycler	DD
CG3530	6:DN1p	0.553556	20.317	0.0356	0.000265011	0.0147954	3.30504	1.04074	3.17566	HC_cycler	DD
vri	6:DN1p	0.743117	11.1697	0.0061	0.000295516	0.016072	6.48224	2.109	3.07361	HC_cycler	DD
CG7781	6:DN1p	0.571341	22.0072	0.0279	0.000322208	0.0163897	5.7865	2.16686	2.67045	HC_cycler	DD
CG13203	6:DN1p	0.520956	11.5223	0.0232	0.000366525	0.0172985	3.875	0.321561	12.0506	HC_cycler	DD
CG34353	6:DN1p	0.787352	16.3433	0.0029	0.00058289	0.0222373	4.88753	1.19375	4.09428	HC_cycler	DD
CG43902	6:DN1p	0.644503	2.99276	0.0081	0.000620189	0.0232723	2.04198	0.137181	14.8852	HC_cycler	DD
slgA	6:DN1p	0.700647	3.14711	0.0074	0.000620189	0.0232723	10.0801	4.53101	2.22469	HC_cycler	DD
CG31324	6:DN1p	0.697805	11.9111	0.0072	0.000777648	0.0271761	2.53745	0.341913	7.42133	HC_cycler	DD
Mmp2	6:DN1p	0.515042	20.0698	0.0309	0.000809987	0.0278806	2.12785	0.144462	14.7295	HC_cycler	DD
ple	6:DN1p	0.538403	4.68736	0.0366	0.000826465	0.0282355	0.869255	0.208429	4.1705	HC_cycler	DD
CG42324	6:DN1p	0.534803	4.10852	0.0316	0.00084358	0.0286067	3.3686	0.182544	18.4537	HC_cycler	DD
chrb	6:DN1p	0.643096	4.76183	0.0174	0.000896245	0.0295181	8.88664	4.16511	2.13359	HC_cycler	DD
SC35	6:DN1p	0.706221	7.88384	0.0066	0.000991394	0.0315181	1.50713	0.248618	6.06205	HC_cycler	DD
FBgn0285926	6:DN1p	0.582175	6.10983	0.005	0.00107405	0.033223	28.1276	12.3487	2.27777	HC_cycler	DD
bun	6:DN1p	0.60706	3.12123	0.0182	0.00114	0.0345624	32.7278	18.8897	1.73257	HC_cycler	DD
Stlk	6:DN1p	0.549361	7.53846	0.0354	0.00114	0.0345624	3.10652	0.517344	6.00475	HC_cycler	DD
sdt	6:DN1p	0.771893	6.03133	0.0005	0.00144445	0.039597	7.58211	3.11662	2.4328	HC_cycler	DD
Alk	6:DN1p	0.55821	16.7254	0.0279	0.00168775	0.0441515	13.4335	6.51598	2.06162	HC_cycler	DD
CG15894	6:DN1p	0.702956	6.20337	0.0111	0.00178873	0.045242	1.21731	0.262033	4.64565	HC_cycler	DD
CG5664	6:DN1p	0.621915	5.15635	0.0053	0.0018232	0.0458604	1.30358	0.226019	5.76759	HC_cycler	DD
Nmda1	6:DN1p	0.52396	19.7574	0.0426	0.00185892	0.0460007	3.76951	1.07766	3.49787	HC_cycler	DD
Ephrin	6:DN1p	0.604294	10.3697	0.0215	0.00196868	0.0481959	2.58756	0.93107	2.77913	HC_cycler	DD
CG32052	7:DN1p	0.693961	20.9992	0.0066	4.33391e-09	9.92033e-06	7.6792	1.41106	5.44215	HC_cycler	DD
tim	7:DN1p	0.637325	12.9918	0.0018	9.17303e-09	1.3998e-05	22.4519	2.35866	9.5189	HC_cycler	DD
AstA	7:DN1p	0.767505	23.8387	0.004	1.85357e-07	0.000141428	46.1457	12.7083	3.63115	HC_cycler	DD
vri	7:DN1p	0.818464	10.9057	0.0014	4.42194e-07	0.000289195	8.12637	2.14695	3.78508	HC_cycler	DD
2mit	7:DN1p	0.778964	11.2342	0.003	8.57611e-07	0.000347177	6.85505	1.59579	4.2957	HC_cycler	DD
CG1358	7:DN1p	0.86694	1.0612	0.0008	9.10032e-07	0.000347177	6.23813	0.134679	46.3184	HC_cycler	DD
CG7702	7:DN1p	0.742112	5.93549	0.0047	8.0809e-07	0.000347177	3.77216	0.421966	8.93949	HC_cycler	DD
kirre	7:DN1p	0.681041	6.96823	0.0047	7.61317e-07	0.000347177	55.7663	13.4619	4.14253	HC_cycler	DD
CG13054	7:DN1p	0.646555	10.9814	0.0097	1.68251e-06	0.000592501	8.29257	1.22259	6.78277	HC_cycler	DD
Ag5r	7:DN1p	0.55004	5.16062	0.0324	4.6481e-06	0.00132994	5.87772	0.604966	9.71578	HC_cycler	DD
Pdp1	7:DN1p	0.619139	14.0035	0.0038	9.66703e-06	0.00221278	151.145	63.9493	2.36352	HC_cycler	DD
Dop1R1	7:DN1p	0.603079	12.6921	0.0063	1.43737e-05	0.00313346	12.2299	2.44152	5.00914	HC_cycler	DD
bru-3	7:DN1p	0.909803	23.3443	0.0001	1.63712e-05	0.00340669	96.8058	50.6821	1.91006	HC_cycler	DD
sif	7:DN1p	0.822521	23.2879	0.0002	2.47152e-05	0.00483752	57.4227	30.1506	1.90453	HC_cycler	DD
CG45263	7:DN1p	0.854633	15.8824	0.0004	2.95267e-05	0.00540694	10.6261	1.71214	6.20632	HC_cycler	DD
qin	7:DN1p	0.62367	7.24302	0.0136	4.51348e-05	0.00737953	14.5732	3.94809	3.6912	HC_cycler	DD
rdgA	7:DN1p	0.532841	8.13247	0.03	6.67466e-05	0.0101855	14.1983	5.37038	2.64381	HC_cycler	DD
fne	7:DN1p	0.623981	0.22593	0.0151	9.33762e-05	0.0129538	59.3743	29.5301	2.01064	HC_cycler	DD
Tbh	7:DN1p	0.58404	19.9115	0.0043	0.000100288	0.0135035	19.9913	5.8022	3.44548	HC_cycler	DD
FBgn0284248	7:DN1p	0.641478	21.7236	0.0141	0.000107625	0.0140773	9.14648	3.76828	2.42723	HC_cycler	DD
CG14439	7:DN1p	0.599925	5.9902	0.0109	0.000121075	0.0149805	3.71003	0.139112	26.6694	HC_cycler	DD
emc	7:DN1p	0.568462	11.7272	0.0125	0.000179449	0.020037	9.5416	1.58477	6.0208	HC_cycler	DD
Eip63F-1	7:DN1p	0.645675	22.0999	0.0167	0.000187849	0.0204661	5.25409	0.981349	5.35395	HC_cycler	DD
dpr12	7:DN1p	0.742822	19.6265	0.0042	0.000241122	0.0245301	8.40282	1.99479	4.2124	HC_cycler	DD
CkIalpha	7:DN1p	0.520266	9.86501	0.0411	0.00025787	0.0251177	23.819	13.1599	1.80997	HC_cycler	DD
RpL32	7:DN1p	0.798397	18.9758	0.0003	0.000359825	0.0322996	4.20411	0.737069	5.70382	HC_cycler	DD
Scp2	7:DN1p	0.863433	12.8898	0.0002	0.000437882	0.0385504	2.14237	0.0337109	63.5511	HC_cycler	DD
Atg1	7:DN1p	0.626028	7.99561	0.007	0.00049853	0.0422643	3.62159	0.534467	6.77609	HC_cycler	DD
tim	8:LN_ITP	0.785593	14.2204	0.0001	1.96501e-14	8.99581e-11	33.9074	2.15734	15.7172	HC_cycler	DD
Argk	8:LN_ITP	0.768136	3.97667	0.0003	1.6482e-11	3.77273e-08	23.3977	1.81477	12.8929	HC_cycler	DD
Pka-R2	8:LN_ITP	0.758513	15.9199	0.0004	3.76404e-11	5.74393e-08	19.5711	2.04528	9.5689	HC_cycler	DD
Fkbp14	8:LN_ITP	0.596395	15.6906	0.0018	4.573e-09	4.18704e-06	10.9134	0.36825	29.6358	HC_cycler	DD
fne	8:LN_ITP	0.829653	1.93326	0.0015	4.3301e-09	4.18704e-06	57.793	20.5513	2.81213	HC_cycler	DD
nmo	8:LN_ITP	0.929312	2.75522	0.0002	1.11093e-08	8.4764e-06	19.5503	2.86421	6.8257	HC_cycler	DD
nrv1	8:LN_ITP	0.797174	2.42815	0.0039	1.29732e-08	8.48446e-06	7.74047	0.462662	16.7303	HC_cycler	DD
igl	8:LN_ITP	0.824032	16.8859	0.0003	3.0469e-08	1.74359e-05	21.1292	3.4379	6.14598	HC_cycler	DD
Tdc2	8:LN_ITP	0.702608	14.4385	0.0001	4.09298e-08	2.08196e-05	8.39819	0.319527	26.2832	HC_cycler	DD
vri	8:LN_ITP	0.847349	14.9034	0.0002	4.97363e-08	2.27693e-05	7.71227	0.644391	11.9683	HC_cycler	DD
CG15628	8:LN_ITP	0.815498	16.0418	0.0003	2.3501e-07	9.7807e-05	19.8309	3.06253	6.47535	HC_cycler	DD
FBgn0284243	8:LN_ITP	0.649515	4.21621	0.0066	1.74715e-06	0.000666538	13.3829	2.66731	5.01737	HC_cycler	DD
amon	8:LN_ITP	0.811704	18.0134	0.0011	6.13042e-06	0.00200465	29.7638	4.5904	6.48391	HC_cycler	DD
Mnt	8:LN_ITP	0.873263	12.602	0.0004	8.71398e-06	0.00234663	7.90845	1.43338	5.51734	HC_cycler	DD
Pdp1	8:LN_ITP	0.777513	17.1311	0.0037	8.37727e-06	0.00234663	114.923	25.144	4.57062	HC_cycler	DD
sif	8:LN_ITP	0.667804	0.917786	0.013	8.37727e-06	0.00234663	35.3912	16.6416	2.12667	HC_cycler	DD
CG5347	8:LN_ITP	0.73058	5.92335	0.0053	1.8605e-05	0.00448283	3.67637	0.167199	21.9879	HC_cycler	DD
Sirup	8:LN_ITP	0.68452	14.7451	0.0039	1.8605e-05	0.00448283	4.36058	0.336413	12.962	HC_cycler	DD
CG15765	8:LN_ITP	0.706133	11.7965	0.0071	2.40817e-05	0.00551231	11.1821	4.19639	2.66469	HC_cycler	DD
CG17777	8:LN_ITP	0.582555	0.746011	0.0039	2.78744e-05	0.00607663	28.7342	5.26507	5.45753	HC_cycler	DD
Irk1	8:LN_ITP	0.66428	15.163	0.0037	4.60992e-05	0.00959282	2.758	0	1.66	HC_cycler	DD
Atpalpha	8:LN_ITP	0.591478	5.05328	0.0117	5.3093e-05	0.0101275	76.303	39.0215	1.95541	HC_cycler	DD
wry	8:LN_ITP	0.70362	3.84793	0.0029	5.12862e-05	0.0101275	3.10395	0.112498	27.5911	HC_cycler	DD
Cbp53E	8:LN_ITP	0.745283	16.2156	0.0013	7.52189e-05	0.0137741	16.257	4.85019	3.35183	HC_cycler	DD
kuz	8:LN_ITP	0.514868	1.07832	0.04	0.000113246	0.0192014	3.17331	0.492169	6.4476	HC_cycler	DD
dpr3	8:LN_ITP	0.67018	16.1697	0.0048	0.000125322	0.0204901	4.64047	0.407087	11.3992	HC_cycler	DD
dpr10	8:LN_ITP	0.713089	17.0773	0.0069	0.000133988	0.0211515	4.00765	0.217087	18.461	HC_cycler	DD
TwdlY	8:LN_ITP	0.686373	5.84324	0.0027	0.000174616	0.024224	3.25327	0	1.66	HC_cycler	DD
A2bp1	8:LN_ITP	0.580573	15.1941	0.0241	0.000199029	0.0261344	9.23328	2.41295	3.82656	HC_cycler	DD
kirre	8:LN_ITP	0.505627	9.70757	0.0388	0.000205513	0.0261344	61.0094	4.71962	12.9267	HC_cycler	DD
ab	8:LN_ITP	0.581056	9.61097	0.0114	0.000257776	0.0312292	3.24507	0.129247	25.1074	HC_cycler	DD
7B2	8:LN_ITP	0.527605	12.8542	0.0399	0.000342999	0.0392562	33.7901	17.4694	1.93424	HC_cycler	DD
SIFaR	8:LN_ITP	0.736329	17.4352	0.0046	0.00040139	0.0448186	2.36132	0	1.66	HC_cycler	DD
CG34370	8:LN_ITP	0.544895	16.1414	0.0159	0.000427174	0.046562	4.49358	0.435698	10.3135	HC_cycler	DD
kirre	9:LNd_NPF	0.732143	7.51064	0.008	5.27066e-10	2.41291e-06	58.9267	7.07928	8.32383	HC_cycler	DD
vri	9:LNd_NPF	0.800992	10.6625	0.0045	3.34298e-08	7.65208e-05	8.78562	1.24547	7.05404	HC_cycler	DD
fne	9:LNd_NPF	0.742566	0.814968	0.0012	1.03722e-07	0.00015828	58.9166	25.3646	2.32279	HC_cycler	DD
Atpalpha	9:LNd_NPF	0.838604	0.239063	0.0009	2.07617e-06	0.00138801	95.9035	43.6827	2.19546	HC_cycler	DD
blot	9:LNd_NPF	0.858081	16.75	0.0006	1.5161e-06	0.00138801	168.455	94.752	1.77785	HC_cycler	DD
CG34357	9:LNd_NPF	0.763045	23.1342	0.0045	2.33495e-06	0.00138801	9.59188	0.520443	18.4302	HC_cycler	DD
Clk	9:LNd_NPF	0.735373	22.9686	0.0025	1.45832e-06	0.00138801	3.82897	0	1.66	HC_cycler	DD
sm	9:LNd_NPF	0.752047	23.0107	0.0032	2.42553e-06	0.00138801	48.1721	17.1974	2.80114	HC_cycler	DD
tim	9:LNd_NPF	0.707906	11.1851	0.0079	5.19298e-06	0.0026415	27.7902	7.8306	3.54892	HC_cycler	DD
Oamb	9:LNd_NPF	0.594688	21.1654	0.0168	7.2556e-06	0.00332161	6.16538	0.546265	11.2864	HC_cycler	DD
Eip63F-1	9:LNd_NPF	0.607575	22.0541	0.0082	1.00707e-05	0.00419125	3.76739	0	1.66	HC_cycler	DD
fs(1)h	9:LNd_NPF	0.65325	4.70134	0.0135	2.0511e-05	0.00670708	18.4045	5.07465	3.62675	HC_cycler	DD
nmo	9:LNd_NPF	0.732701	21.3295	0.0012	2.0511e-05	0.00670708	21.5989	4.65422	4.64072	HC_cycler	DD
CG43902	9:LNd_NPF	0.647833	1.78383	0.002	4.21548e-05	0.0128656	7.41088	1.03219	7.17976	HC_cycler	DD
Rbp6	9:LNd_NPF	0.890374	23.2158	0.0001	6.49046e-05	0.0165074	39.0159	19.212	2.0308	HC_cycler	DD
CG31224	9:LNd_NPF	0.520169	7.45805	0.0209	7.89591e-05	0.0172131	15.6455	2.86719	5.45675	HC_cycler	DD
CR45185	9:LNd_NPF	0.70297	5.58515	0.0062	8.70625e-05	0.0181169	5.07287	0.0809572	62.6611	HC_cycler	DD
CG2909	9:LNd_NPF	0.555515	7.63122	0.0278	9.28634e-05	0.0182838	2.64428	0	1.66	HC_cycler	DD
Tbh	9:LNd_NPF	0.836754	22.4795	0.0005	9.58521e-05	0.0182838	18.9062	4.7737	3.96049	HC_cycler	DD
CG15628	9:LNd_NPF	0.699509	9.64424	0.0079	0.000180162	0.0294565	25.8997	6.35284	4.07688	HC_cycler	DD
CG15890	9:LNd_NPF	0.669512	6.2585	0.0066	0.000216736	0.0342143	6.29033	0	1.66	HC_cycler	DD
Dh44	9:LNd_NPF	0.670765	21.5952	0.0078	0.000260201	0.0360969	5.28892	0.992378	5.32954	HC_cycler	DD
Pdp1	9:LNd_NPF	0.736105	12.319	0.0037	0.000244877	0.0360969	120.855	45.5908	2.65086	HC_cycler	DD
CG32698	9:LNd_NPF	0.662056	7.16599	0.0039	0.000395465	0.0476431	2.05078	0.141019	14.5426	HC_cycler	DD
His3.3B	9:LNd_NPF	0.777356	5.5358	0.0048	0.000395465	0.0476431	84.51	42.582	1.98464	HC_cycler	DD

## Sheet: Info
To be considered cycling, the following cutoffs were used: a JTK cycle adjusted p-value of less than 0.05, a F24 score of greater than 0.5, and a cycling amplitude (maximum expression divided by minimum expression) of at least 1.5-fold (if minimum was zero and maximum was >.8; amplitude threshold was met) , and a maximum expression of at least 0.8 TP10K.
