# Supplementary material for: A transcriptomic taxonomy of Drosophila circadian neurons around the clock
Source: eLife. 2021 Jan 13;10:e63056. doi: 10.7554/eLife.63056 (PMC7837698; doi:10.7554/eLife.63056)
Supplement: Supplementary file 3. — Table displaying the GO terms and their p-values of the pooled rhythmically expressed genes. [file elife-63056-supp3.xlsx]

## Sheet: GO all LD cyclers
source	term_name	term_id	adjusted_p_value	negative_log10_of_adjusted_p_value	term_size	query_size	intersection_size	effective_domain_size	intersections
GO:BP	response to chemical	GO:0042221	1.75842e-14	13.7549	701	1042	227	5407	DD,CLK,PKA-R1,ANT2,DYRK2,MMP2,NACHRALPHA6,SDC,EIP75B,NVY,DOP1R1,RDX,DSCAM4,BACC,THOR,PKA-R2,CG34353,DSCAM2,SYTBETA,DPR11,JEB,CG5549,EIP93F,SM,RAD,HSC70-3,VVL,CV-2,TBH,SLI,PDI,HDAC4,FBGN0284408,KUZ,DH44,PKA-C1,TEN-M,NACHRALPHA1,PDE8,14-3-3ZETA,FASN1,FRU,BR,SCA,SNPF,MTT,SIFAR,GSTD1,CG8405,PXN,DPR1,BEAT-IIIC,DALLY,CG44153,SYTALPHA,DLG1,DRAT,HSC70-4,CAM,SFL,UNC-76,FUTSCH,14-3-3EPSILON,VGLUT,PDK1,PROS…
GO:BP	response to stimulus	GO:0050896	4.20985e-13	12.3757	1705	1042	446	5407	DD,TIM,CLK,PKA-R1,HMGZ,ANT2,DYRK2,MMP2,CRY,NMO,NACHRALPHA6,SDC,EIP75B,NVY,CNMA,DOP1R1,WRY,CHRB,RDX,AC13E,CG32547,DSCAM4,BACC,PVRAP,CBP53E,EIP63F-1,THOR,PKA-R2,CG34353,DSCAM2,SYTBETA,DPR11,JEB,CG5549,EIP93F,CG13995,SM,RAD,HSC70-3,KUG,VVL,PROC,CV-2,TBH,CG34357,CG43658,SLI,PDI,HDAC4,CALX,FBGN0284408,KUZ,DH44,PKA-C1,TEN-M,HSP23,SLGA,NACHRALPHA1,HIPK,PORIN,PDE8,14-3-3ZETA,CG3822,FASN1,KEK1,FRU,BR,SCA,…
GO:BP	multicellular organismal process	GO:0032501	4.66343e-13	12.3313	1812	1042	468	5407	DD,TIM,PDP1,VRI,FNE,CLK,PKA-R1,NHE2,CHN,CHINMO,CG9705,DYRK2,AMON,MMP2,CRY,NMO,NACHRALPHA6,SDC,EIP75B,VIB,CG11221,NVY,DOP1R1,DPR13,2MIT,CWO,WRY,CHRB,RDX,DSCAM4,FIFE,BACC,THOR,PKA-R2,CG34353,DSCAM2,DPR11,JEB,CG15765,SVR,SM,ACT5C,RAD,HSC70-3,AG5R2,NPC2B,CG9850,KUG,VVL,APP,PROC,CV-2,CG6959,IRK1,TBH,CG43658,SLI,HDAC4,CALX,FBGN0284408,KUZ,PU,PKA-C1,TEN-M,EMC,VEPD,NACHRALPHA1,HIPK,PORIN,RIM,MYPT-75D,14-…
GO:BP	signaling	GO:0023052	1.73555e-12	11.7606	1215	1042	339	5407	DD,PKA-R1,DYRK2,MMP2,CRY,NMO,NACHRALPHA6,EIP75B,CNMA,DOP1R1,WRY,CHRB,RDX,AC13E,CG32547,FIFE,PVRAP,CBP53E,EIP63F-1,THOR,PKA-R2,SYTBETA,JEB,CG13995,RAD,HSC70-3,CG9850,PROC,CV-2,TBH,CG34357,CG43658,SLI,PDI,HDAC4,CALX,FBGN0284408,KUZ,DH44,PKA-C1,TEN-M,NACHRALPHA1,HIPK,PORIN,RIM,PDE8,14-3-3ZETA,CG3822,KEK1,SCA,TRISSIN,OCTBETA1R,CG13375,SNPF,CG31183,MTT,SIFAR,SKY,DH31,DALLY,UNC-13-4A,WAKE,CG43373,MKP3,…
GO:BP	cell communication	GO:0007154	1.7939e-12	11.7462	1238	1042	344	5407	DD,PKA-R1,DYRK2,MMP2,CRY,NMO,NACHRALPHA6,EIP75B,CNMA,DOP1R1,WRY,CHRB,RDX,AC13E,CG32547,FIFE,PVRAP,CBP53E,EIP63F-1,THOR,PKA-R2,SYTBETA,JEB,CG13995,RAD,HSC70-3,CG9850,PROC,CV-2,TBH,CG34357,CG43658,SLI,PDI,HDAC4,CALX,FBGN0284408,KUZ,DH44,PKA-C1,TEN-M,NACHRALPHA1,HIPK,PORIN,RIM,PDE8,14-3-3ZETA,CG3822,KEK1,SCA,TRISSIN,OCTBETA1R,CG13375,SNPF,CG31183,MTT,SIFAR,SKY,DH31,DALLY,UNC-13-4A,WAKE,CG43373,MKP3,…
GO:BP	taxis	GO:0042330	1.19109e-11	10.9241	268	1042	108	5407	TIM,MMP2,CRY,NMO,SDC,NVY,DOP1R1,DSCAM4,PKA-R2,CG34353,DSCAM2,DPR11,JEB,SM,VVL,SLI,FBGN0284408,KUZ,TEN-M,SLGA,HIPK,FRU,BR,BEAT-IIIC,DALLY,PDFR,CG44153,DLG1,HSC70-4,CAM,UNC-76,14-3-3EPSILON,PROS,BRAT,PK,CG6330,ROBO3,PDM3,UZIP,MOE,BEAT-VI,SHEP,DSCAM3,DDC,SIDE,TEN-A,DYSC,UNC-104,CKA,RAC1,JING,CG13506,NORPA,MP,COMM,FAS3,HTS,SOXN,TOLL-6,ABL,BEAT-IA,BEAT-VB,KLG,GOGO,SP2353,BEAT-IC,GUKH,FBGN0285925,BEAT-…
GO:BP	axon development	GO:0061564	1.33017e-11	10.8761	279	1042	111	5407	MMP2,SDC,NVY,DSCAM4,PKA-R2,CG34353,DSCAM2,DPR11,JEB,SM,VVL,CG6959,SLI,FBGN0284408,KUZ,PKA-C1,TEN-M,FRU,BEAT-IIIC,DALLY,SICK,CG44153,HSC70-4,CAM,FAX,UNC-76,FUTSCH,14-3-3EPSILON,PROS,BRAT,PK,GCLC,ROBO3,PDM3,UZIP,RUT,MOE,BEAT-VI,SH,DSCAM3,SIDE,TEN-A,DYSC,ANK2,UNC-104,RAC1,JING,CG13506,MP,SFF,COMM,KEK5,FAS3,HTS,SOXN,ABL,BEAT-IA,BEAT-VB,KLG,GOGO,SP2353,BEAT-IC,GUKH,FBGN0285925,BEAT-IB,DSCAM1,DNC,MSN,C…
GO:BP	axonogenesis	GO:0007409	1.3768e-11	10.8611	272	1042	109	5407	MMP2,SDC,NVY,DSCAM4,PKA-R2,CG34353,DSCAM2,DPR11,JEB,SM,VVL,CG6959,SLI,FBGN0284408,KUZ,TEN-M,FRU,BEAT-IIIC,DALLY,SICK,CG44153,HSC70-4,CAM,FAX,UNC-76,FUTSCH,14-3-3EPSILON,PROS,BRAT,PK,GCLC,ROBO3,PDM3,UZIP,RUT,MOE,BEAT-VI,SH,DSCAM3,SIDE,TEN-A,DYSC,ANK2,UNC-104,RAC1,JING,CG13506,MP,SFF,COMM,KEK5,FAS3,HTS,SOXN,ABL,BEAT-IA,BEAT-VB,KLG,GOGO,SP2353,BEAT-IC,GUKH,FBGN0285925,BEAT-IB,DSCAM1,DNC,MSN,CADN,TAI…
GO:BP	behavior	GO:0007610	6.17407e-11	10.2094	354	1042	130	5407	TIM,VRI,FNE,CLK,PKA-R1,DYRK2,AMON,CRY,CG11221,DOP1R1,2MIT,BACC,PKA-R2,SVR,SM,RAD,MID1,IRK1,TBH,HDAC4,DH44,PKA-C1,SLGA,14-3-3ZETA,KDN,FRU,SNPF,MTT,SIFAR,DH31,DPR1,CG14509,WAKE,CG6329,PDFR,APPL,HSP83,DLG1,NLG2,TOB,BE,FBGN0285944,FUTSCH,ITP,PROS,TDC2,DAT,SIK3,OAMB,DPR9,RUT,MOE,LILLI,SHEP,NACP60E,ATPALPHA,PLC21C,SH,BTK29A,DDC,MEF2,DYSC,PUM,ANK2,UNC-104,RAC1,NORPA,CG4612,PDE1C,CG17734,BOL,ECR,EAG,OVO,…
GO:BP	G protein-coupled receptor signaling pathway	GO:0007186	1.1049e-10	9.95668	134	1042	66	5407	CNMA,DOP1R1,AC13E,CG32547,CG13995,PROC,TBH,DH44,PKA-C1,TRISSIN,OCTBETA1R,SNPF,MTT,SIFAR,DH31,CG43373,5-HT1A,PDFR,CG44153,NPLP1,CAM,ITP,ASTC-R2,MACHR-B,DH31-R,OAMB,RUT,ASTC,AC78C,CCHA1,CG13229,5-HT2B,CG32683,NORPA,OCTBETA3R,GABA-B-R3,INAC,PK2-R1,TRISSINR,ASTA,GGAMMA30A,CG31760,7B2,TKR86C,DOP1R2,CG34384,CG33639,GBETA13F,CG31140,GALPHAS,CG43324,OCT-TYRR,SNPF-R,FZ2,FMRFAR,RDGB,KTUB,RH7,SUN,CCHA2-R,RY…
GO:BP	neuron projection morphogenesis	GO:0048812	1.1105e-10	9.95448	345	1042	127	5407	CHN,CG9705,MMP2,SDC,NVY,CWO,DSCAM4,PKA-R2,CG34353,DSCAM2,DPR11,JEB,SM,VVL,CG6959,SLI,FBGN0284408,KUZ,TEN-M,FRU,BR,BEAT-IIIC,DALLY,SICK,CG44153,APPL,HSC70-4,CAM,FAX,UNC-76,FUTSCH,14-3-3EPSILON,PROS,BRAT,PK,GCLC,ROBO3,PDM3,UZIP,RUT,MOE,BEAT-VI,SH,DSCAM3,SIDE,TEN-A,DYSC,PUM,ANK2,UNC-104,RAC1,JING,CG13506,TER94,RFX,MP,ECR,SFF,COMM,KEK5,FAS3,HTS,SOXN,TOLL-6,ABL,PURA,BEAT-IA,BEAT-VB,KLG,GOGO,SP2353,BEA…
GO:BP	plasma membrane bounded cell projection morphogenesis	GO:0120039	1.1105e-10	9.95448	345	1042	127	5407	CHN,CG9705,MMP2,SDC,NVY,CWO,DSCAM4,PKA-R2,CG34353,DSCAM2,DPR11,JEB,SM,VVL,CG6959,SLI,FBGN0284408,KUZ,TEN-M,FRU,BR,BEAT-IIIC,DALLY,SICK,CG44153,APPL,HSC70-4,CAM,FAX,UNC-76,FUTSCH,14-3-3EPSILON,PROS,BRAT,PK,GCLC,ROBO3,PDM3,UZIP,RUT,MOE,BEAT-VI,SH,DSCAM3,SIDE,TEN-A,DYSC,PUM,ANK2,UNC-104,RAC1,JING,CG13506,TER94,RFX,MP,ECR,SFF,COMM,KEK5,FAS3,HTS,SOXN,TOLL-6,ABL,PURA,BEAT-IA,BEAT-VB,KLG,GOGO,SP2353,BEA…
GO:BP	nervous system development	GO:0007399	1.20245e-10	9.91993	774	1042	233	5407	VRI,PKA-R1,CHN,CHINMO,CG9705,AMON,MMP2,NMO,SDC,NVY,CWO,DSCAM4,FIFE,PKA-R2,CG34353,DSCAM2,DPR11,JEB,CG15765,SM,VVL,APP,CG6959,SLI,FBGN0284408,KUZ,PKA-C1,TEN-M,EMC,RIM,14-3-3ZETA,FRU,BR,SCA,OCTBETA1R,SKY,BEAT-IIIC,DALLY,FUR1,WAKE,SICK,HIG,CNO,EYS,SPN,CG44153,APPL,HSP83,DLG1,NLG2,STAI,HSC70-4,CAM,FAX,UNC-76,SYP,FUTSCH,14-3-3EPSILON,PDK1,PROS,GFRL,BRAT,PK,NOLO,GCLC,ROBO3,ED,PDM3,ESN,UZIP,RUT,MAM,MOE,…
GO:BP	neuron differentiation	GO:0030182	1.54071e-10	9.81228	554	1042	180	5407	VRI,CHN,CHINMO,CG9705,AMON,MMP2,SDC,NVY,CWO,DSCAM4,PKA-R2,CG34353,DSCAM2,DPR11,JEB,SM,VVL,APP,CG6959,SLI,FBGN0284408,KUZ,PKA-C1,TEN-M,EMC,RIM,FRU,BR,SCA,SKY,BEAT-IIIC,DALLY,FUR1,SICK,HIG,EYS,SPN,CG44153,APPL,HSP83,STAI,HSC70-4,CAM,FAX,UNC-76,FUTSCH,14-3-3EPSILON,PROS,BRAT,PK,GCLC,ROBO3,ED,PDM3,ESN,UZIP,RUT,MAM,MOE,BEAT-VI,LILLI,SHEP,SH,DSCAM3,DPR12,SIDE,TEN-A,STY,DYSC,PUM,ANK2,UNC-104,LIM1,RAC1,J…
GO:BP	neuron projection development	GO:0031175	1.57743e-10	9.80205	369	1042	133	5407	CHN,CG9705,MMP2,SDC,NVY,CWO,DSCAM4,PKA-R2,CG34353,DSCAM2,DPR11,JEB,SM,VVL,CG6959,SLI,FBGN0284408,KUZ,PKA-C1,TEN-M,FRU,BR,SKY,BEAT-IIIC,DALLY,SICK,SPN,CG44153,APPL,STAI,HSC70-4,CAM,FAX,UNC-76,FUTSCH,14-3-3EPSILON,PROS,BRAT,PK,GCLC,ROBO3,PDM3,UZIP,RUT,MOE,BEAT-VI,SH,DSCAM3,SIDE,TEN-A,DYSC,PUM,ANK2,UNC-104,RAC1,JING,CG13506,TER94,RFX,MP,ECR,SFF,COMM,KEK5,FAS3,HTS,SOXN,TOLL-6,ABL,PURA,BEAT-IA,BEAT-VB…
GO:BP	cell projection morphogenesis	GO:0048858	1.86784e-10	9.72866	347	1042	127	5407	CHN,CG9705,MMP2,SDC,NVY,CWO,DSCAM4,PKA-R2,CG34353,DSCAM2,DPR11,JEB,SM,VVL,CG6959,SLI,FBGN0284408,KUZ,TEN-M,FRU,BR,BEAT-IIIC,DALLY,SICK,CG44153,APPL,HSC70-4,CAM,FAX,UNC-76,FUTSCH,14-3-3EPSILON,PROS,BRAT,PK,GCLC,ROBO3,PDM3,UZIP,RUT,MOE,BEAT-VI,SH,DSCAM3,SIDE,TEN-A,DYSC,PUM,ANK2,UNC-104,RAC1,JING,CG13506,TER94,RFX,MP,ECR,SFF,COMM,KEK5,FAS3,HTS,SOXN,TOLL-6,ABL,PURA,BEAT-IA,BEAT-VB,KLG,GOGO,SP2353,BEA…
GO:BP	axon guidance	GO:0007411	5.00556e-10	9.30055	220	1042	91	5407	MMP2,SDC,NVY,DSCAM4,PKA-R2,CG34353,DSCAM2,DPR11,JEB,SM,VVL,SLI,FBGN0284408,KUZ,TEN-M,FRU,BEAT-IIIC,DALLY,CG44153,HSC70-4,CAM,UNC-76,14-3-3EPSILON,PROS,BRAT,PK,ROBO3,PDM3,UZIP,MOE,BEAT-VI,DSCAM3,SIDE,TEN-A,DYSC,UNC-104,RAC1,JING,CG13506,MP,COMM,FAS3,HTS,SOXN,ABL,BEAT-IA,BEAT-VB,KLG,GOGO,SP2353,BEAT-IC,GUKH,FBGN0285925,BEAT-IB,DSCAM1,MSN,CADN,SPEN,TTV,CADN2,POD1,LOLA,LIPRIN-ALPHA,RHOGAP100F,PLEXA,L…
GO:BP	cell morphogenesis	GO:0000902	5.16412e-10	9.287	428	1042	147	5407	CHN,CG9705,MMP2,SDC,NVY,CWO,DSCAM4,PKA-R2,CG34353,DSCAM2,DPR11,JEB,SM,VVL,CG6959,SLI,FBGN0284408,KUZ,TEN-M,FRU,BR,BEAT-IIIC,DALLY,SICK,CNO,EYS,CG44153,APPL,HSC70-4,CAM,FAX,UNC-76,FUTSCH,14-3-3EPSILON,PROS,BRAT,PK,GCLC,ROBO3,ED,PDM3,UZIP,RUT,MOE,BEAT-VI,ATPALPHA,SH,DSCAM3,SIDE,TEN-A,DYSC,PUM,ANK2,UNC-104,RAC1,JING,CG13506,TER94,RFX,MP,ECR,SFF,COMM,DIA,KEK5,OVO,GARZ,FAS3,HTS,SOXN,TOLL-6,ABL,PURA,BE…
GO:BP	neuron development	GO:0048666	7.24206e-10	9.14014	473	1042	158	5407	CHN,CHINMO,CG9705,MMP2,SDC,NVY,CWO,DSCAM4,PKA-R2,CG34353,DSCAM2,DPR11,JEB,SM,VVL,CG6959,SLI,FBGN0284408,KUZ,PKA-C1,TEN-M,RIM,FRU,BR,SKY,BEAT-IIIC,DALLY,FUR1,SICK,HIG,EYS,SPN,CG44153,APPL,STAI,HSC70-4,CAM,FAX,UNC-76,FUTSCH,14-3-3EPSILON,PROS,BRAT,PK,GCLC,ROBO3,PDM3,ESN,UZIP,RUT,MOE,BEAT-VI,LILLI,SHEP,SH,DSCAM3,DPR12,SIDE,TEN-A,STY,DYSC,PUM,ANK2,UNC-104,RAC1,JING,CG13506,TER94,RFX,MP,ECR,SFF,COMM,U…
GO:BP	generation of neurons	GO:0048699	8.33913e-10	9.07888	608	1042	191	5407	VRI,CHN,CHINMO,CG9705,AMON,MMP2,SDC,NVY,CWO,DSCAM4,PKA-R2,CG34353,DSCAM2,DPR11,JEB,SM,VVL,APP,CG6959,SLI,FBGN0284408,KUZ,PKA-C1,TEN-M,EMC,RIM,FRU,BR,SCA,SKY,BEAT-IIIC,DALLY,FUR1,WAKE,SICK,HIG,EYS,SPN,CG44153,APPL,HSP83,DLG1,STAI,HSC70-4,CAM,FAX,UNC-76,FUTSCH,14-3-3EPSILON,PROS,BRAT,PK,GCLC,ROBO3,ED,PDM3,ESN,UZIP,RUT,MAM,MOE,DAP160,BEAT-VI,LILLI,SHEP,SH,DSCAM3,DPR12,SIDE,TEN-A,STY,DYSC,PUM,ANK2,UN…
GO:BP	neurogenesis	GO:0022008	8.65621e-10	9.06267	629	1042	196	5407	VRI,CHN,CHINMO,CG9705,AMON,MMP2,SDC,NVY,CWO,DSCAM4,PKA-R2,CG34353,DSCAM2,DPR11,JEB,SM,VVL,APP,CG6959,SLI,FBGN0284408,KUZ,PKA-C1,TEN-M,EMC,RIM,FRU,BR,SCA,SKY,BEAT-IIIC,DALLY,FUR1,WAKE,SICK,HIG,CNO,EYS,SPN,CG44153,APPL,HSP83,DLG1,STAI,HSC70-4,CAM,FAX,UNC-76,FUTSCH,14-3-3EPSILON,PROS,BRAT,PK,GCLC,ROBO3,ED,PDM3,ESN,UZIP,RUT,MAM,MOE,DAP160,BEAT-VI,LILLI,SHEP,SH,DSCAM3,DPR12,SIDE,TEN-A,STY,DYSC,PUM,ANK…
GO:BP	cell part morphogenesis	GO:0032990	1.09354e-09	8.96117	354	1042	127	5407	CHN,CG9705,MMP2,SDC,NVY,CWO,DSCAM4,PKA-R2,CG34353,DSCAM2,DPR11,JEB,SM,VVL,CG6959,SLI,FBGN0284408,KUZ,TEN-M,FRU,BR,BEAT-IIIC,DALLY,SICK,CG44153,APPL,HSC70-4,CAM,FAX,UNC-76,FUTSCH,14-3-3EPSILON,PROS,BRAT,PK,GCLC,ROBO3,PDM3,UZIP,RUT,MOE,BEAT-VI,SH,DSCAM3,SIDE,TEN-A,DYSC,PUM,ANK2,UNC-104,RAC1,JING,CG13506,TER94,RFX,MP,ECR,SFF,COMM,KEK5,FAS3,HTS,SOXN,TOLL-6,ABL,PURA,BEAT-IA,BEAT-VB,KLG,GOGO,SP2353,BEA…
GO:BP	cell morphogenesis involved in neuron differentiation	GO:0048667	1.20115e-09	8.9204	343	1042	124	5407	CHN,CG9705,MMP2,SDC,NVY,CWO,DSCAM4,PKA-R2,CG34353,DSCAM2,DPR11,JEB,SM,VVL,CG6959,SLI,FBGN0284408,KUZ,TEN-M,FRU,BR,BEAT-IIIC,DALLY,SICK,CG44153,HSC70-4,CAM,FAX,UNC-76,FUTSCH,14-3-3EPSILON,PROS,BRAT,PK,GCLC,ROBO3,PDM3,UZIP,RUT,MOE,BEAT-VI,SH,DSCAM3,SIDE,TEN-A,DYSC,PUM,ANK2,UNC-104,RAC1,JING,CG13506,TER94,RFX,MP,ECR,SFF,COMM,KEK5,FAS3,HTS,SOXN,TOLL-6,ABL,BEAT-IA,BEAT-VB,KLG,GOGO,SP2353,BEAT-IC,GUKH,…
GO:BP	neuron projection guidance	GO:0097485	1.5738e-09	8.80305	227	1042	92	5407	MMP2,SDC,NVY,DSCAM4,PKA-R2,CG34353,DSCAM2,DPR11,JEB,SM,VVL,SLI,FBGN0284408,KUZ,TEN-M,FRU,BEAT-IIIC,DALLY,CG44153,HSC70-4,CAM,UNC-76,14-3-3EPSILON,PROS,BRAT,PK,ROBO3,PDM3,UZIP,MOE,BEAT-VI,DSCAM3,SIDE,TEN-A,DYSC,UNC-104,RAC1,JING,CG13506,MP,COMM,FAS3,HTS,SOXN,TOLL-6,ABL,BEAT-IA,BEAT-VB,KLG,GOGO,SP2353,BEAT-IC,GUKH,FBGN0285925,BEAT-IB,DSCAM1,MSN,CADN,SPEN,TTV,CADN2,POD1,LOLA,LIPRIN-ALPHA,RHOGAP100F,…
GO:BP	system process	GO:0003008	1.63818e-09	8.78564	303	1042	113	5407	TIM,VRI,CLK,PKA-R1,DYRK2,CRY,NACHRALPHA6,SDC,CG11221,DOP1R1,DPR13,2MIT,WRY,DPR11,SVR,RAD,PROC,TBH,HDAC4,CALX,PKA-C1,NACHRALPHA1,14-3-3ZETA,DPR15,DPR1,CG43729,APPL,NRV3,CAM,TOB,BE,FBGN0285944,FUTSCH,PROS,DPR10,PDM3,OAMB,DPR9,DPR3,DPR8,RUT,ASTC,AC78C,LILLI,NACP60E,ATPALPHA,SH,BTK29A,CG15537,DDC,DPR12,DYSC,PUM,ANK2,DPR17,RAC1,NORPA,CG4612,RFX,MP,CA-ALPHA1T,ECR,EAG,DIA,ABL,INAC,PKD2,RGK1,KLG,GGAMMA30…
GO:BP	cellular component morphogenesis	GO:0032989	1.66856e-09	8.77766	481	1042	159	5407	CHN,CG9705,MMP2,SDC,NVY,CWO,DSCAM4,PKA-R2,CG34353,DSCAM2,DPR11,JEB,SM,VVL,CG6959,SLI,FBGN0284408,KUZ,TEN-M,EMC,FRU,BR,BEAT-IIIC,DALLY,SICK,CNO,EYS,CG44153,APPL,HSC70-4,CAM,FAX,UNC-76,SYP,FUTSCH,14-3-3EPSILON,PROS,BRAT,PK,GCLC,ROBO3,ED,PDM3,UZIP,RUT,MOE,BEAT-VI,ATPALPHA,SH,DSCAM3,SIDE,TEN-A,DYSC,PUM,ANK2,UNC-104,RAC1,JING,CG13506,TER94,RFX,MP,ECR,SFF,COMM,DIA,NDL,KEK5,OVO,GARZ,PUC,FAS3,HTS,SOXN,TO…
GO:BP	regulation of biological quality	GO:0065008	2.09745e-09	8.67831	870	1042	251	5407	TIM,CLK,NHE2,ANT2,CHINMO,CG9705,AMON,SK,NMO,NACHRALPHA6,SDC,EIP75B,ALD,DOP1R1,RDX,FIFE,CBP53E,THOR,SYTBETA,DPR11,TRPM,SVR,CG5549,ACT5C,MID1,HSC70-3,NPC2B,PROC,NRV1,IRK1,TBH,PDI,KUZ,DH44,TEN-M,NACHRALPHA1,HIPK,RIM,14-3-3ZETA,CG3822,FRU,SCA,OCTBETA1R,CG1090,SNPF,SKY,DH31,CG14509,DALLY,FUR1,UNC-13-4A,MKP3,CNO,CG43729,CG42260,PDFR,SPN,SYTALPHA,RAB3-GEF,HSP83,DLG1,NLG2,HSC70-4,NRV3,CAM,ENDOA,SYP,FBGN0…
GO:BP	cell morphogenesis involved in differentiation	GO:0000904	2.56705e-09	8.59057	369	1042	130	5407	CHN,CG9705,MMP2,SDC,NVY,CWO,DSCAM4,PKA-R2,CG34353,DSCAM2,DPR11,JEB,SM,VVL,CG6959,SLI,FBGN0284408,KUZ,TEN-M,FRU,BR,BEAT-IIIC,DALLY,SICK,CG44153,HSC70-4,CAM,FAX,UNC-76,FUTSCH,14-3-3EPSILON,PROS,BRAT,PK,GCLC,ROBO3,PDM3,UZIP,RUT,MOE,BEAT-VI,SH,DSCAM3,SIDE,TEN-A,DYSC,PUM,ANK2,UNC-104,RAC1,JING,CG13506,TER94,RFX,MP,ECR,SFF,COMM,DIA,KEK5,FAS3,HTS,SOXN,TOLL-6,ABL,BEAT-IA,BEAT-VB,KLG,GOGO,PPCS,SP2353,BEAT…
GO:BP	system development	GO:0048731	4.03659e-09	8.39398	1139	1042	310	5407	DD,VRI,PKA-R1,NHE2,CHN,CHINMO,CG9705,AMON,MMP2,NMO,SDC,NVY,CWO,RDX,DSCAM4,FIFE,PKA-R2,CG34353,DSCAM2,DPR11,JEB,CG15765,SVR,SM,KUG,VVL,APP,CV-2,CG6959,IRK1,CG43658,SLI,FBGN0284408,KUZ,PU,PKA-C1,TEN-M,EMC,HIPK,RIM,MYPT-75D,14-3-3ZETA,FRU,BR,SCA,OCTBETA1R,SKY,CG8405,BEAT-IIIC,DALLY,FUR1,WAKE,MKP3,SICK,HIG,CNO,EYS,SPN,CG44153,APPL,HSP83,DLG1,CG43921,NLG2,STAI,HSC70-4,CAM,FAX,SFL,UNC-76,SYP,FUTSCH,14-…
GO:BP	chemotaxis	GO:0006935	1.01323e-08	7.99429	233	1042	92	5407	MMP2,SDC,NVY,DSCAM4,PKA-R2,CG34353,DSCAM2,DPR11,JEB,SM,VVL,SLI,FBGN0284408,KUZ,TEN-M,FRU,BEAT-IIIC,DALLY,CG44153,HSC70-4,CAM,UNC-76,14-3-3EPSILON,PROS,BRAT,PK,ROBO3,PDM3,UZIP,MOE,BEAT-VI,DSCAM3,SIDE,TEN-A,DYSC,UNC-104,RAC1,JING,CG13506,MP,COMM,FAS3,HTS,SOXN,TOLL-6,ABL,BEAT-IA,BEAT-VB,KLG,GOGO,SP2353,BEAT-IC,GUKH,FBGN0285925,BEAT-IB,DSCAM1,MSN,CADN,SPEN,TTV,CADN2,POD1,LOLA,LIPRIN-ALPHA,RHOGAP100F,…
GO:BP	nervous system process	GO:0050877	1.02523e-08	7.98918	251	1042	97	5407	PKA-R1,DYRK2,CRY,NACHRALPHA6,SDC,CG11221,DOP1R1,DPR13,2MIT,DPR11,SVR,RAD,TBH,HDAC4,CALX,PKA-C1,NACHRALPHA1,14-3-3ZETA,DPR15,DPR1,APPL,NRV3,CAM,TOB,BE,FBGN0285944,FUTSCH,PROS,DPR10,PDM3,OAMB,DPR9,DPR3,DPR8,RUT,AC78C,LILLI,NACP60E,ATPALPHA,SH,BTK29A,DDC,DPR12,DYSC,PUM,ANK2,DPR17,RAC1,NORPA,CG4612,RFX,CA-ALPHA1T,ECR,EAG,DIA,ABL,INAC,RGK1,KLG,GGAMMA30A,ATP8B,MOB2,DSCAM1,DNC,SIF,ARM,SGG,TOMOSYN,NACHRA…
GO:BP	locomotion	GO:0040011	1.06416e-08	7.97299	442	1042	147	5407	TIM,MMP2,CRY,NMO,SDC,NVY,DOP1R1,DSCAM4,PKA-R2,CG34353,DSCAM2,DPR11,JEB,SM,KUG,VVL,TBH,SLI,FBGN0284408,KUZ,PU,TEN-M,SLGA,HIPK,FRU,BR,BEAT-IIIC,DALLY,PDFR,CG44153,DLG1,STAI,HSC70-4,CAM,SFL,UNC-76,14-3-3EPSILON,PROS,BRAT,PK,CG6330,ROBO3,PDM3,UZIP,MOE,BEAT-VI,SHEP,DSCAM3,PVR,DDC,SIDE,TEN-A,DYSC,PUM,UNC-104,MSP300,CKA,RAC1,JING,CG13506,NORPA,MP,ECR,COMM,PUC,FAS3,HTS,SOXN,TOLL-6,CSK,ABL,INAC,PKD2,BEAT-…
GO:BP	plasma membrane bounded cell projection organization	GO:0120036	1.95563e-08	7.70871	429	1042	143	5407	VRI,CHN,CG9705,MMP2,SDC,NVY,CWO,DSCAM4,PKA-R2,CG34353,DSCAM2,DPR11,JEB,SM,KUG,VVL,APP,CG6959,SLI,FBGN0284408,KUZ,PKA-C1,TEN-M,FRU,BR,SKY,BEAT-IIIC,DALLY,SICK,SPN,CG44153,APPL,STAI,HSC70-4,CAM,FAX,UNC-76,FUTSCH,14-3-3EPSILON,PROS,BRAT,PK,GCLC,ROBO3,PDM3,UZIP,RUT,MOE,BEAT-VI,SH,DSCAM3,SIDE,TEN-A,DYSC,PUM,ANK2,UNC-104,RAC1,JING,CG13506,TER94,RFX,MP,ECR,SFF,COMM,DIA,KEK5,OVO,FAS3,HTS,SOXN,TOLL-6,ABL,…
GO:BP	cation transmembrane transport	GO:0098655	3.39393e-08	7.4693	174	1042	74	5407	NHE2,SK,TRPM,CG5549,MID1,NRV1,IRK1,CG11319,CALX,NACHRALPHA1,CG3822,CG1090,CG43729,CG42260,CG6329,CD98HC,NRV3,CAM,FBGN0285944,CG42817,NCKX30C,ATPSYNCF6,SHAB,NACP60E,ATPALPHA,PLC21C,SH,FER1HCH,ND-MLRQ,VHA16-1,COX6B,JP,NORPA,CYPE,CA-ALPHA1T,ATPSYND,EAG,CG1688,UNC80,PKD2,RGK1,CG10960,RGK3,SEC61ALPHA,LEVY,ATPSYNG,CNGB,SHAW,COX7A,BLW,FWE,CAC,SLO,COX7C,CG10413,CA-ALPHA1D,COX5B,SERCA,COX5A,VHASFD,ATPSYNO…
GO:BP	cell projection organization	GO:0030030	5.46106e-08	7.26272	438	1042	144	5407	VRI,CHN,CG9705,MMP2,SDC,NVY,CWO,DSCAM4,PKA-R2,CG34353,DSCAM2,DPR11,JEB,SM,KUG,VVL,APP,CG6959,SLI,FBGN0284408,KUZ,PKA-C1,TEN-M,FRU,BR,SKY,BEAT-IIIC,DALLY,SICK,SPN,CG44153,APPL,STAI,HSC70-4,CAM,FAX,UNC-76,FUTSCH,14-3-3EPSILON,PROS,BRAT,PK,GCLC,ROBO3,PDM3,UZIP,RUT,MOE,BEAT-VI,SH,DSCAM3,PVR,SIDE,TEN-A,DYSC,PUM,ANK2,UNC-104,RAC1,JING,CG13506,TER94,RFX,MP,ECR,SFF,COMM,DIA,KEK5,OVO,FAS3,HTS,SOXN,TOLL-6,…
GO:BP	anatomical structure development	GO:0048856	6.06074e-08	7.21747	1560	1042	395	5407	DD,TIM,PDP1,VRI,CLK,PKA-R1,NHE2,CHN,CHINMO,CG9705,AMON,MMP2,NMO,SDC,EIP75B,VIB,ALD,NVY,CWO,CHRB,RDX,DSCAM4,FIFE,THOR,PKA-R2,CG34353,DSCAM2,DPR11,MSPO,JEB,CG15765,SVR,SM,ACT5C,NPC2B,CG9850,KUG,VVL,APP,CV-2,CG6959,IRK1,CG43658,SLI,FBGN0284408,KUZ,PU,PKA-C1,TEN-M,EMC,VEPD,HIPK,PORIN,RIM,MYPT-75D,PDE8,14-3-3ZETA,KEK1,FRU,BR,SCA,OCTBETA1R,SNPF,SIFAR,SKY,CG8405,BEAT-IIIC,DALLY,FUR1,WAKE,MKP3,SICK,HIG,C…
GO:BP	ion transmembrane transport	GO:0034220	6.54952e-08	7.18379	243	1042	93	5407	NHE2,SK,NACHRALPHA6,TRPM,CG5549,MID1,NRV1,IRK1,CG1607,CG11319,CALX,NACHRALPHA1,PORIN,CG3822,CG1090,CG43729,CG42260,CG6329,CD98HC,NRV3,CAM,FBGN0285944,VGLUT,CG42817,NCKX30C,ATPSYNCF6,CG8026,SHAB,CG8177,NACP60E,ATPALPHA,PLC21C,SH,FER1HCH,ND-MLRQ,VHA16-1,DYSC,SEA,COX6B,PMP70,JP,NORPA,CYPE,CA-ALPHA1T,ATPSYND,EAG,CG1688,BEST1,UNC80,PKD2,RGK1,CG10960,RGK3,INDY,SEC61ALPHA,LEVY,ATPSYNG,CNGB,SHAW,COX7A,CG…
GO:BP	cation transport	GO:0006812	1.06026e-07	6.97459	223	1042	87	5407	NHE2,SK,NACHRALPHA6,SYTBETA,TRPM,CG5549,MID1,NRV1,IRK1,CG11319,CALX,NACHRALPHA1,CG3822,CG1090,CG43729,CG42260,CG6329,SYTALPHA,CD98HC,NRV3,CAM,FBGN0285944,CG42817,NCKX30C,SYT4,ATPSYNCF6,DAT,CG1358,SHAB,DPR3,NACP60E,ATPALPHA,PLC21C,SH,FER1HCH,ND-MLRQ,VHA16-1,COX6B,JP,NORPA,CYPE,CA-ALPHA1T,ATPSYND,EAG,CG1688,UNC80,PKD2,RGK1,CG10960,RGK3,INDY,SEC61ALPHA,LEVY,ATPSYNG,CNGB,SHAW,COX7A,CG7708,NACHRALPHA3…
GO:BP	response to external stimulus	GO:0009605	1.18903e-07	6.92481	586	1042	179	5407	TIM,CLK,HMGZ,MMP2,CRY,NMO,SDC,EIP75B,NVY,DOP1R1,DSCAM4,THOR,PKA-R2,CG34353,DSCAM2,DPR11,JEB,SM,KUG,VVL,SLI,HDAC4,CALX,FBGN0284408,KUZ,TEN-M,SLGA,HIPK,PORIN,FRU,BR,SNPF,CG14509,BEAT-IIIC,DALLY,HMGD,SICK,PDFR,CG44153,DLG1,HSC70-4,NRV3,CAM,ENDOA,UNC-76,FBGN0285944,14-3-3EPSILON,MTD,PROS,BRAT,PK,CG6330,ROBO3,SIK3,PDM3,OAMB,UZIP,MOE,BEAT-VI,SHEP,ATPALPHA,PLC21C,SH,BTK29A,ALPHATUB84B,FER1HCH,DSCAM3,PVR…
GO:BP	signal transduction	GO:0007165	1.36633e-07	6.86444	1066	1042	288	5407	DD,PKA-R1,DYRK2,MMP2,CRY,NMO,NACHRALPHA6,EIP75B,CNMA,DOP1R1,WRY,CHRB,RDX,AC13E,CG32547,PVRAP,EIP63F-1,THOR,PKA-R2,JEB,CG13995,RAD,HSC70-3,PROC,CV-2,TBH,CG34357,CG43658,SLI,PDI,HDAC4,CALX,FBGN0284408,KUZ,DH44,PKA-C1,NACHRALPHA1,HIPK,PORIN,PDE8,14-3-3ZETA,CG3822,KEK1,SCA,TRISSIN,OCTBETA1R,CG13375,SNPF,CG31183,MTT,SIFAR,DH31,DALLY,WAKE,CG43373,MKP3,PKC53E,CNO,PDE11,CG43729,CG42260,5-HT1A,PDFR,SPN,CG…
GO:BP	inorganic cation transmembrane transport	GO:0098662	1.39439e-07	6.85562	151	1042	66	5407	NHE2,SK,TRPM,MID1,NRV1,IRK1,CG11319,CALX,CG3822,CG1090,CG43729,CG6329,NRV3,FBGN0285944,CG42817,NCKX30C,ATPSYNCF6,SHAB,NACP60E,ATPALPHA,PLC21C,SH,FER1HCH,ND-MLRQ,VHA16-1,COX6B,JP,NORPA,CYPE,CA-ALPHA1T,ATPSYND,EAG,CG1688,PKD2,RGK1,CG10960,RGK3,SEC61ALPHA,LEVY,ATPSYNG,SHAW,COX7A,BLW,FWE,CAC,SLO,COX7C,CG10413,CA-ALPHA1D,COX5B,SERCA,COX5A,VHASFD,ATPSYNO,ATPSYNGAMMA,NEDD4,COX8,VHAAC45,NDAE1,ATPSYNF,COX…
GO:BP	anatomical structure morphogenesis	GO:0009653	1.81937e-07	6.74008	955	1042	263	5407	DD,VRI,NHE2,CHN,CG9705,AMON,MMP2,NMO,SDC,NVY,CWO,CHRB,RDX,DSCAM4,THOR,PKA-R2,CG34353,DSCAM2,DPR11,MSPO,JEB,SVR,SM,ACT5C,KUG,VVL,APP,CV-2,CG6959,CG43658,SLI,FBGN0284408,KUZ,PKA-C1,TEN-M,EMC,HIPK,PORIN,MYPT-75D,14-3-3ZETA,FRU,BR,SCA,BEAT-IIIC,DALLY,MKP3,SICK,CNO,EYS,CG44153,APPL,SCYL,HSP83,DLG1,CG43921,HSC70-4,CAM,FAX,SFL,UNC-76,SYP,FUTSCH,14-3-3EPSILON,PROS,BRAT,PK,GOL,GCLC,ROBO3,ED,PDM3,FKBP14,UZ…
GO:BP	cell differentiation	GO:0030154	1.96467e-07	6.70671	1037	1042	281	5407	VRI,PKA-R1,CHN,CHINMO,CG9705,AMON,MMP2,SDC,EIP75B,NVY,CWO,DSCAM4,THOR,PKA-R2,CG34353,DSCAM2,DPR11,MSPO,JEB,SM,ACT5C,KUG,VVL,APP,CG6959,SLI,FBGN0284408,KUZ,PKA-C1,TEN-M,EMC,PORIN,RIM,14-3-3ZETA,KEK1,FRU,BR,SCA,SKY,BEAT-IIIC,DALLY,FUR1,WAKE,SICK,HIG,CNO,EYS,SPN,CG44153,APPL,RBP6,HSP83,DLG1,STAI,HSC70-4,CAM,FAX,UNC-76,SYP,FUTSCH,14-3-3EPSILON,PDK1,PROS,BRAT,PK,GCLC,ROBO3,ED,PDM3,ESN,UZIP,RUT,MAM,MOE…
GO:BP	multicellular organism development	GO:0007275	2.0554e-07	6.6871	1428	1042	365	5407	DD,TIM,PDP1,VRI,CLK,PKA-R1,NHE2,CHN,CHINMO,CG9705,AMON,MMP2,NMO,SDC,EIP75B,VIB,NVY,CWO,CHRB,RDX,DSCAM4,FIFE,THOR,PKA-R2,CG34353,DSCAM2,DPR11,JEB,CG15765,SVR,SM,ACT5C,NPC2B,CG9850,KUG,VVL,APP,CV-2,CG6959,IRK1,CG43658,SLI,FBGN0284408,KUZ,PU,PKA-C1,TEN-M,EMC,VEPD,HIPK,PORIN,RIM,MYPT-75D,14-3-3ZETA,FRU,BR,SCA,OCTBETA1R,SNPF,SIFAR,SKY,CG8405,BEAT-IIIC,DALLY,FUR1,WAKE,MKP3,SICK,HIG,CNO,EYS,SPN,CG44153,…
GO:BP	cell-cell adhesion via plasma-membrane adhesion molecules	GO:0098742	2.14733e-07	6.6681	50	1042	32	5407	DSCAM4,CG34353,DSCAM2,KUG,CAD87A,BEAT-IIIC,CG44153,ED,BEAT-VI,DSCAM3,CG13506,FAS3,SDK,LAC,BEAT-IA,BEAT-VB,KLG,BEAT-IC,FBGN0285925,BEAT-IB,DSCAM1,CADN,CADN2,LAR,CALS,BEAT-VII,SNS,BEAT-IV,BEAT-VA,STAN,IF,FAS2
GO:BP	developmental process	GO:0032502	3.46457e-07	6.46035	1610	1042	402	5407	DD,TIM,PDP1,VRI,CLK,PKA-R1,NHE2,CHN,CHINMO,CG9705,AMON,MMP2,NMO,SDC,EIP75B,VIB,ALD,NVY,CWO,CHRB,RDX,DSCAM4,FIFE,THOR,PKA-R2,CG34353,DSCAM2,DPR11,MSPO,JEB,CG15765,SVR,SM,ACT5C,NPC2B,CG9850,KUG,VVL,APP,CV-2,CG6959,IRK1,CG43658,SLI,FBGN0284408,KUZ,PU,PKA-C1,TEN-M,EMC,VEPD,HIPK,PORIN,RIM,MYPT-75D,PDE8,14-3-3ZETA,KEK1,FRU,BR,SCA,OCTBETA1R,SNPF,SIFAR,SKY,CG8405,BEAT-IIIC,DALLY,FUR1,WAKE,MKP3,PKC53E,SIC…
GO:BP	biological regulation	GO:0065007	3.91143e-07	6.40766	2625	1042	604	5407	DD,TIM,PDP1,VRI,FNE,CLK,PKA-R1,FBGN0284248,NHE2,CHN,HMGZ,ANT2,CHINMO,CG9705,DYRK2,AMON,CG32369,MMP2,CRY,SK,NMO,NACHRALPHA6,SDC,EIP75B,ALD,CG11221,NVY,CNMA,DOP1R1,CWO,WRY,CHRB,RDX,AC13E,CG32547,FIFE,PVRAP,CBP53E,EIP63F-1,THOR,PKA-R2,SYTBETA,DPR11,MSPO,JEB,TRPM,SVR,CG5549,EIP93F,CG13995,MNT,ACT5C,RAD,MID1,HSC70-3,NPC2B,CG9850,KUG,VVL,PROC,CV-2,NRV1,IRK1,TBH,CG11319,CG34357,CG43658,SLI,PDI,HDAC4,CAL…
GO:BP	cell development	GO:0048468	5.05722e-07	6.29609	891	1042	247	5407	PKA-R1,CHN,CHINMO,CG9705,MMP2,SDC,EIP75B,NVY,CWO,DSCAM4,PKA-R2,CG34353,DSCAM2,DPR11,JEB,SM,ACT5C,KUG,VVL,CG6959,SLI,FBGN0284408,KUZ,PKA-C1,TEN-M,EMC,PORIN,RIM,14-3-3ZETA,KEK1,FRU,BR,SKY,BEAT-IIIC,DALLY,FUR1,SICK,HIG,EYS,SPN,CG44153,APPL,RBP6,HSP83,DLG1,STAI,HSC70-4,CAM,FAX,UNC-76,SYP,FUTSCH,14-3-3EPSILON,PROS,BRAT,PK,GCLC,ROBO3,ED,PDM3,ESN,UZIP,RUT,MAM,MOE,DAP160,BEAT-VI,LILLI,TET,SHEP,SH,BTK29A,…
GO:BP	inorganic ion transmembrane transport	GO:0098660	1.24164e-06	5.906	164	1042	68	5407	NHE2,SK,TRPM,MID1,NRV1,IRK1,CG11319,CALX,CG3822,CG1090,CG43729,CG6329,NRV3,FBGN0285944,CG42817,NCKX30C,ATPSYNCF6,SHAB,NACP60E,ATPALPHA,PLC21C,SH,FER1HCH,ND-MLRQ,VHA16-1,COX6B,JP,NORPA,CYPE,CA-ALPHA1T,ATPSYND,EAG,CG1688,BEST1,PKD2,RGK1,CG10960,RGK3,SEC61ALPHA,LEVY,ATPSYNG,SHAW,COX7A,BLW,FWE,CAC,SLO,COX7C,CG10413,CA-ALPHA1D,COX5B,SERCA,COX5A,VHASFD,ATPSYNO,ATPSYNGAMMA,NEDD4,COX8,VHAAC45,NDAE1,ATPSY…
GO:BP	response to drug	GO:0042493	1.36845e-06	5.86377	124	1042	56	5407	CLK,PKA-R1,ANT2,DOP1R1,BACC,PKA-R2,SYTBETA,CG5549,TBH,FBGN0284408,PKA-C1,PDE8,SYTALPHA,DLG1,DRAT,CAM,VGLUT,PDK1,SYT4,MACHR-B,CG8026,TDC2,DAT,OAMB,DPR9,RUT,AC78C,SH,DDC,5-HT2B,PUM,CG17734,ECR,GLOB1,AKAP200,INAC,KLG,GGAMMA30A,HPPY,INDY,DNC,BX,SGG,DOP1R2,CG8745,CASK,CG3556,SLO,GALPHAS,INR,RL,S,S6K,CG32103,FAS2,5-HT2A
GO:BP	regulation of cellular process	GO:0050794	1.52216e-06	5.81754	2224	1042	523	5407	DD,TIM,PDP1,VRI,FNE,CLK,PKA-R1,FBGN0284248,CHN,HMGZ,CHINMO,CG9705,DYRK2,CG32369,MMP2,CRY,NMO,NACHRALPHA6,SDC,EIP75B,NVY,CNMA,DOP1R1,CWO,WRY,CHRB,RDX,AC13E,CG32547,FIFE,PVRAP,CBP53E,EIP63F-1,THOR,PKA-R2,SYTBETA,DPR11,MSPO,JEB,SVR,EIP93F,CG13995,MNT,RAD,HSC70-3,CG9850,KUG,VVL,PROC,CV-2,TBH,CG34357,CG43658,SLI,PDI,HDAC4,CALX,FBGN0284408,KUZ,PU,DH44,PKA-C1,TEN-M,TNA,EMC,NACHRALPHA1,HIPK,PORIN,RIM,GLU…
GO:BP	cellular developmental process	GO:0048869	2.34393e-06	5.63005	1071	1042	284	5407	VRI,PKA-R1,CHN,CHINMO,CG9705,AMON,MMP2,SDC,EIP75B,NVY,CWO,DSCAM4,THOR,PKA-R2,CG34353,DSCAM2,DPR11,MSPO,JEB,SM,ACT5C,KUG,VVL,APP,CG6959,SLI,FBGN0284408,KUZ,PKA-C1,TEN-M,EMC,PORIN,RIM,14-3-3ZETA,KEK1,FRU,BR,SCA,SKY,BEAT-IIIC,DALLY,FUR1,WAKE,SICK,HIG,CNO,EYS,SPN,CG44153,APPL,RBP6,HSP83,DLG1,STAI,HSC70-4,CAM,FAX,UNC-76,SYP,FUTSCH,14-3-3EPSILON,PDK1,PROS,BRAT,PK,GCLC,ROBO3,ED,PDM3,ESN,UZIP,RUT,MAM,MOE…
GO:BP	cell-cell signaling	GO:0007267	2.39106e-06	5.62141	353	1042	118	5407	PKA-R1,DYRK2,MMP2,NMO,NACHRALPHA6,DOP1R1,FIFE,CBP53E,THOR,SYTBETA,JEB,CG9850,PKA-C1,TEN-M,NACHRALPHA1,HIPK,RIM,CG3822,SCA,MTT,SKY,DALLY,UNC-13-4A,CG6329,SYTALPHA,RAB3-GEF,DLG1,NLG2,HSC70-4,SFL,SYP,BE,VGLUT,SYT4,PK,MACHR-B,TWIT,DAT,OAMB,FRQ2,FRQ1,GLUT1,RUT,MAM,CPX,ATPALPHA,PLC21C,SH,CG15537,TEN-A,5-HT2B,DYSC,PUM,ANK2,UNC-104,RAB3,TER94,SRPK79D,FLW,COW,USP8,SOXN,NKD,CSK,ABL,RPH,PAN,DNC,NLG3,ARM,SPE…
GO:BP	cell-cell adhesion	GO:0098609	4.80029e-06	5.31873	92	1042	45	5407	DSCAM4,CG34353,DSCAM2,KUG,SLI,TEN-M,CAD87A,BEAT-IIIC,MKP3,CG44153,DLG1,NLG2,ED,BEAT-VI,DSCAM3,TEN-A,CG13506,FAS3,SDK,LAC,BEAT-IA,PYD,BEAT-VB,KLG,BEAT-IC,FBGN0285925,BEAT-IB,DSCAM1,SEC23,CADN,NLG3,ARM,CADN2,LAR,CALS,BEAT-VII,SNS,SRC64B,BEAT-IV,BEAT-VA,TKV,STAN,IF,NLG4,FAS2
GO:BP	cell recognition	GO:0008037	4.97203e-06	5.30347	89	1042	44	5407	MMP2,IGL,DSCAM4,DSCAM2,SLI,FBGN0284408,TEN-M,FRU,BEAT-IIIC,FUR1,HIG,CG44153,HSC70-4,ROBO3,ESN,UZIP,DSCAM3,DPR12,TEN-A,RAC1,COMM,FAS3,ABL,BEAT-IA,BEAT-IC,FBGN0285925,DSCAM1,CADN,LOLA,PLEXA,SHOT,NRM,CG32373,NEDD4,FZ2,CG42637,RHOGAP93B,TRIM9,STAN,IF,DRL,PVF3,NRT,FAS2
GO:BP	regulation of localization	GO:0032879	5.41059e-06	5.26676	389	1042	126	5407	TIM,RDX,FIFE,SYTBETA,CG9850,IRK1,CG11319,SLI,KUZ,PU,PKA-C1,RIM,SKY,DALLY,PKC53E,CNO,CG43729,CG6329,SYTALPHA,CAM,FBGN0285944,PROS,SYT4,BRAT,PK,TWIT,SIK3,SHAB,FRQ2,FRQ1,GLUT1,MOE,CPX,LILLI,NACP60E,PLC21C,SH,CG15537,CG42795,PVR,DYSC,UNC-104,RAB3,RAC1,TER94,JP,NORPA,CG32506,ARFGAP1,EAG,COMM,PUC,MTOR,AKAP200,ABL,INAC,RAB32,RGK1,RGK3,PYD,ATP8B,INDY,SEC61ALPHA,KLAR,DSCAM1,SEC23,SHAW,CADN,TAI,SGG,TOMOSYN…
GO:BP	ion transport	GO:0006811	7.59264e-06	5.11961	327	1042	110	5407	NHE2,ANT2,SK,NACHRALPHA6,VIB,SYTBETA,TRPM,CG5549,MID1,NRV1,IRK1,CG1607,CG11319,CALX,NACHRALPHA1,PORIN,CG3822,CG1090,CG43729,CG42260,CG6329,SYTALPHA,CD98HC,NRV3,CAM,FBGN0285944,VGLUT,CG42817,NCKX30C,SYT4,ATPSYNCF6,CG8026,DAT,CG1358,SHAB,DPR3,CG8177,NACP60E,ATPALPHA,PLC21C,SH,FER1HCH,ND-MLRQ,VHA16-1,DYSC,SEA,COX6B,PMP70,JP,NORPA,CYPE,CA-ALPHA1T,ATPSYND,EAG,CG1688,BEST1,CG33298,UNC80,PKD2,RGK1,CG109…
GO:BP	regulation of biological process	GO:0050789	1.21243e-05	4.91634	2390	1042	551	5407	DD,TIM,PDP1,VRI,FNE,CLK,PKA-R1,FBGN0284248,CHN,HMGZ,CHINMO,CG9705,DYRK2,CG32369,MMP2,CRY,NMO,NACHRALPHA6,SDC,EIP75B,CG11221,NVY,CNMA,DOP1R1,CWO,WRY,CHRB,RDX,AC13E,CG32547,FIFE,PVRAP,CBP53E,EIP63F-1,THOR,PKA-R2,SYTBETA,DPR11,MSPO,JEB,SVR,CG5549,EIP93F,CG13995,MNT,RAD,HSC70-3,CG9850,KUG,VVL,PROC,CV-2,IRK1,TBH,CG11319,CG34357,CG43658,SLI,PDI,HDAC4,CALX,FBGN0284408,KUZ,PU,DH44,PKA-C1,TEN-M,TNA,EMC,NA…
GO:BP	neuron recognition	GO:0008038	1.3178e-05	4.88015	88	1042	43	5407	MMP2,DSCAM4,DSCAM2,SLI,FBGN0284408,TEN-M,FRU,BEAT-IIIC,FUR1,HIG,CG44153,HSC70-4,ROBO3,ESN,UZIP,DSCAM3,DPR12,TEN-A,RAC1,COMM,FAS3,ABL,BEAT-IA,BEAT-IC,FBGN0285925,DSCAM1,CADN,LOLA,PLEXA,SHOT,NRM,CG32373,NEDD4,FZ2,CG42637,RHOGAP93B,TRIM9,STAN,IF,DRL,PVF3,NRT,FAS2
GO:BP	monovalent inorganic cation transport	GO:0015672	1.82268e-05	4.73929	111	1042	50	5407	NHE2,SK,NRV1,IRK1,CG11319,CALX,CG1090,CG6329,NRV3,FBGN0285944,NCKX30C,ATPSYNCF6,SHAB,NACP60E,ATPALPHA,SH,ND-MLRQ,VHA16-1,COX6B,CYPE,CA-ALPHA1T,ATPSYND,EAG,CG1688,CG10960,INDY,LEVY,ATPSYNG,SHAW,COX7A,CG7708,BLW,SLO,COX7C,CG10413,COX5B,SERCA,COX5A,VHASFD,ATPSYNO,ATPSYNGAMMA,NEDD4,COX8,VHAAC45,NDAE1,ATPSYNF,COX4,SUN,ND-20,CG42732
GO:BP	second-messenger-mediated signaling	GO:0019932	2.23298e-05	4.65112	68	1042	36	5407	PKA-R1,DOP1R1,AC13E,EIP63F-1,PKA-R2,CG34357,PKA-C1,CG3822,OCTBETA1R,CG31183,DH31,CG43373,CG42260,PDFR,SPN,NPLP1,CAM,GYC88E,RUT,CG10738,AC78C,NORPA,OCTBETA3R,INAC,DNC,CNGB,SGG,DOP1R2,CAC,NF1,GALPHAS,CA-ALPHA1D,OCT-TYRR,CG42637,RDGC,CG16721
GO:BP	homophilic cell adhesion via plasma membrane adhesion molecules	GO:0007156	2.58668e-05	4.58726	31	1042	22	5407	DSCAM4,CG34353,DSCAM2,KUG,CAD87A,CG44153,ED,DSCAM3,CG13506,FAS3,SDK,LAC,KLG,FBGN0285925,DSCAM1,CADN,CADN2,LAR,CALS,SNS,STAN,FAS2
GO:BP	synapse organization	GO:0050808	3.55104e-05	4.44964	245	1042	87	5407	NMO,SDC,DPR13,FIFE,THOR,CG34353,DPR11,JEB,TEN-M,OCTBETA1R,DPR15,DPR1,FUR1,SPN,APPL,DLG1,NLG2,STAI,SYP,FUTSCH,PDK1,PROS,BRAT,DIP-DELTA,DPR10,FRQ2,DPR9,FRQ1,DPR3,DPR8,RUT,DAP160,CPX,ATPALPHA,DPR12,TEN-A,DYSC,PUM,ANK2,UNC-104,DPR17,RAB3,RAC1,CG13506,SRPK79D,SFF,COMM,DIP-BETA,ABL,KLG,MOB2,NLG3,SGG,TTV,CMPY,PI4KIIIALPHA,POD1,CAMKII,LIPRIN-ALPHA,FBGN0285926,CASK,RHOGAP100F,LAR,CALS,PLUM,CAC,SMT3,NF1,SL…
GO:BP	chemical synaptic transmission	GO:0007268	5.284e-05	4.27704	224	1042	81	5407	PKA-R1,NACHRALPHA6,DOP1R1,FIFE,CBP53E,THOR,SYTBETA,JEB,PKA-C1,TEN-M,NACHRALPHA1,RIM,CG3822,MTT,SKY,UNC-13-4A,CG6329,SYTALPHA,RAB3-GEF,DLG1,NLG2,HSC70-4,SYP,BE,VGLUT,SYT4,MACHR-B,TWIT,DAT,OAMB,FRQ2,FRQ1,RUT,CPX,ATPALPHA,PLC21C,SH,TEN-A,5-HT2B,DYSC,PUM,ANK2,RAB3,SRPK79D,CSK,ABL,RPH,DNC,NLG3,TOMOSYN,DOP1R2,NACHRALPHA3,NACHRALPHA5,ACE,NSYB,GLURIB,CAMKII,CASK,SAP47,SYNGR,CALS,CAC,SLO,GALPHAS,SERCA,ACS…
GO:BP	anterograde trans-synaptic signaling	GO:0098916	5.284e-05	4.27704	224	1042	81	5407	PKA-R1,NACHRALPHA6,DOP1R1,FIFE,CBP53E,THOR,SYTBETA,JEB,PKA-C1,TEN-M,NACHRALPHA1,RIM,CG3822,MTT,SKY,UNC-13-4A,CG6329,SYTALPHA,RAB3-GEF,DLG1,NLG2,HSC70-4,SYP,BE,VGLUT,SYT4,MACHR-B,TWIT,DAT,OAMB,FRQ2,FRQ1,RUT,CPX,ATPALPHA,PLC21C,SH,TEN-A,5-HT2B,DYSC,PUM,ANK2,RAB3,SRPK79D,CSK,ABL,RPH,DNC,NLG3,TOMOSYN,DOP1R2,NACHRALPHA3,NACHRALPHA5,ACE,NSYB,GLURIB,CAMKII,CASK,SAP47,SYNGR,CALS,CAC,SLO,GALPHAS,SERCA,ACS…
GO:BP	trans-synaptic signaling	GO:0099537	8.61747e-05	4.06462	226	1042	81	5407	PKA-R1,NACHRALPHA6,DOP1R1,FIFE,CBP53E,THOR,SYTBETA,JEB,PKA-C1,TEN-M,NACHRALPHA1,RIM,CG3822,MTT,SKY,UNC-13-4A,CG6329,SYTALPHA,RAB3-GEF,DLG1,NLG2,HSC70-4,SYP,BE,VGLUT,SYT4,MACHR-B,TWIT,DAT,OAMB,FRQ2,FRQ1,RUT,CPX,ATPALPHA,PLC21C,SH,TEN-A,5-HT2B,DYSC,PUM,ANK2,RAB3,SRPK79D,CSK,ABL,RPH,DNC,NLG3,TOMOSYN,DOP1R2,NACHRALPHA3,NACHRALPHA5,ACE,NSYB,GLURIB,CAMKII,CASK,SAP47,SYNGR,CALS,CAC,SLO,GALPHAS,SERCA,ACS…
GO:BP	cellular response to stimulus	GO:0051716	0.000103594	3.98467	1312	1042	328	5407	DD,TIM,PKA-R1,DYRK2,MMP2,CRY,NMO,NACHRALPHA6,EIP75B,CNMA,DOP1R1,WRY,CHRB,RDX,AC13E,CG32547,PVRAP,EIP63F-1,THOR,PKA-R2,SYTBETA,JEB,EIP93F,CG13995,RAD,HSC70-3,PROC,CV-2,TBH,CG34357,CG43658,SLI,PDI,HDAC4,CALX,FBGN0284408,KUZ,DH44,PKA-C1,NACHRALPHA1,HIPK,PORIN,PDE8,14-3-3ZETA,CG3822,FASN1,KEK1,BR,SCA,TRISSIN,OCTBETA1R,CG13375,SNPF,CG31183,MTT,SIFAR,DH31,CG8405,PXN,DALLY,WAKE,CG43373,MKP3,PKC53E,CNO,P…
GO:BP	synaptic signaling	GO:0099536	0.000109639	3.96003	227	1042	81	5407	PKA-R1,NACHRALPHA6,DOP1R1,FIFE,CBP53E,THOR,SYTBETA,JEB,PKA-C1,TEN-M,NACHRALPHA1,RIM,CG3822,MTT,SKY,UNC-13-4A,CG6329,SYTALPHA,RAB3-GEF,DLG1,NLG2,HSC70-4,SYP,BE,VGLUT,SYT4,MACHR-B,TWIT,DAT,OAMB,FRQ2,FRQ1,RUT,CPX,ATPALPHA,PLC21C,SH,TEN-A,5-HT2B,DYSC,PUM,ANK2,RAB3,SRPK79D,CSK,ABL,RPH,DNC,NLG3,TOMOSYN,DOP1R2,NACHRALPHA3,NACHRALPHA5,ACE,NSYB,GLURIB,CAMKII,CASK,SAP47,SYNGR,CALS,CAC,SLO,GALPHAS,SERCA,ACS…
GO:BP	cell adhesion	GO:0007155	0.000168066	3.77452	141	1042	57	5407	DSCAM4,CG34353,DSCAM2,MSPO,KUG,SLI,TEN-M,CAD87A,BEAT-IIIC,MKP3,CG44153,DLG1,NLG2,ED,BEAT-VI,DSCAM3,TEN-A,RAC1,CG13506,MP,FLW,ECR,FAS3,SDK,LAC,BEAT-IA,PYD,BEAT-VB,KLG,BEAT-IC,FBGN0285925,BEAT-IB,DSCAM1,SEC23,CADN,NLG3,ARM,CADN2,GBETA13F,PLEXA,LAR,CALS,PLX,BEAT-VII,PAX,SNS,SRC64B,BEAT-IV,BEAT-VA,TKV,STAN,IF,NRT,18W,NLG4,CCN,FAS2
GO:BP	biological adhesion	GO:0022610	0.000229595	3.63904	142	1042	57	5407	DSCAM4,CG34353,DSCAM2,MSPO,KUG,SLI,TEN-M,CAD87A,BEAT-IIIC,MKP3,CG44153,DLG1,NLG2,ED,BEAT-VI,DSCAM3,TEN-A,RAC1,CG13506,MP,FLW,ECR,FAS3,SDK,LAC,BEAT-IA,PYD,BEAT-VB,KLG,BEAT-IC,FBGN0285925,BEAT-IB,DSCAM1,SEC23,CADN,NLG3,ARM,CADN2,GBETA13F,PLEXA,LAR,CALS,PLX,BEAT-VII,PAX,SNS,SRC64B,BEAT-IV,BEAT-VA,TKV,STAN,IF,NRT,18W,NLG4,CCN,FAS2
GO:BP	cyclic-nucleotide-mediated signaling	GO:0019935	0.00027698	3.55755	44	1042	26	5407	PKA-R1,DOP1R1,AC13E,PKA-R2,CG34357,PKA-C1,OCTBETA1R,CG31183,DH31,CG43373,CG42260,PDFR,NPLP1,GYC88E,RUT,CG10738,AC78C,OCTBETA3R,DNC,CNGB,DOP1R2,NF1,GALPHAS,OCT-TYRR,CG42637,CG16721
GO:BP	growth	GO:0040007	0.00032928	3.48243	314	1042	102	5407	NMO,SDC,CHRB,THOR,JEB,MNT,KUG,KUZ,PKA-C1,TEN-M,HIPK,OCTBETA1R,SNPF,DALLY,CNO,CG9328,SCYL,DLG1,NLG2,STAI,SFL,SYP,FUTSCH,14-3-3EPSILON,PDK1,BRAT,PK,RGN,HR4,RUT,DAP160,CPX,ATPALPHA,SH,TEN-A,DYSC,PUM,ANK2,UNC-104,RAC1,JING,EAG,TOLL-6,CSK,ABL,HPPY,MOB2,DSCAM1,PAN,CIC,DNC,BUN,CADN,TAI,ARM,WAP,SGG,CMPY,PI4KIIIALPHA,CADN2,FWE,CAMKII,LIPRIN-ALPHA,RIN,FBGN0285926,CYCG,CASK,TCTP,RHOGAP100F,PLEXA,LAR,PLUM,CA…
GO:BP	purine nucleotide metabolic process	GO:0006163	0.000790362	3.10217	88	1042	40	5407	ALD,AC13E,CG34357,PDE8,CG6767,CG31183,CG43373,PDE11,CG5065,DLG1,ATPSYNCF6,GYC88E,FRQ1,RUT,CG10738,AC78C,PYK,PDE1C,ATPSYND,PGLYM78,PPCS,DNC,ATPSYNG,ENO,PDE6,BLW,PLEXA,COX5B,ACSL,ATPSYNO,ATPSYNGAMMA,ATPSYNF,PGK,TPI,SUN,GAPDH1,CG42637,GAPDH2,ADSS,PGI
GO:BP	mating	GO:0007618	0.000796677	3.09872	60	1042	31	5407	TIM,FNE,TBH,FRU,SIFAR,DLG1,NLG2,FBGN0285944,PROS,OAMB,RUT,MOE,SHEP,SH,BTK29A,PDE1C,BOL,EAG,PKD2,KTL,DNC,CAMKII,CASK,CAC,SLO,LOV,INR,CORTO,MBL,TWZ,SPR
GO:BP	neuropeptide signaling pathway	GO:0007218	0.0011302	2.94685	49	1042	27	5407	CG32547,CG13995,PROC,DH44,SNPF,SIFAR,DH31,PDFR,NPLP1,ITP,ASTC-R2,DH31-R,ASTC,CCHA1,CG13229,PK2-R1,TRISSINR,ASTA,7B2,TKR86C,CG33639,SNPF-R,FMRFAR,RH7,CCHA2-R,RYA-R,ASTA-R1
GO:BP	response to organic substance	GO:0010033	0.00129659	2.8872	354	1042	110	5407	DD,CLK,PKA-R1,MMP2,EIP75B,DOP1R1,RDX,BACC,THOR,PKA-R2,HSC70-3,CV-2,TBH,HDAC4,FBGN0284408,DH44,PKA-C1,FASN1,BR,SCA,SIFAR,CG8405,DALLY,DLG1,DRAT,HSC70-4,CAM,SFL,PDK1,ASTC-R2,MACHR-B,DH31-R,TDC2,HR4,SIK3,OAMB,DPR9,RUT,XBP1,AC78C,SH,PYK,CG15537,PVR,STY,5-HT2B,PUM,TER94,CG17734,ECR,EAG,KEK5,TOLL-6,AKAP200,HSP68,INAC,TRISSINR,CG32276,KLG,DIF,CG32082,GGAMMA30A,GP93,HPPY,DSCAM1,DNC,BEL,TAI,BX,SGG,DOP1R2,…
GO:BP	rhythmic behavior	GO:0007622	0.00129741	2.88692	86	1042	39	5407	TIM,VRI,CLK,CRY,PKA-R2,MID1,IRK1,DH44,PKA-C1,DH31,WAKE,CG6329,PDFR,HSP83,DLG1,ITP,TDC2,DAT,SIK3,OAMB,SH,MEF2,DYSC,RAC1,ECR,UNC80,PURA,TYF,DNC,BX,SGG,DOP1R2,GW,NF1,SLO,INR,NUMB,HR51,RH7
GO:BP	mating behavior	GO:0007617	0.00131761	2.88021	58	1042	30	5407	TIM,FNE,TBH,FRU,SIFAR,DLG1,NLG2,FBGN0285944,PROS,OAMB,RUT,MOE,SHEP,SH,BTK29A,PDE1C,BOL,EAG,KTL,DNC,CAMKII,CASK,CAC,SLO,LOV,INR,CORTO,MBL,TWZ,SPR
GO:BP	developmental growth	GO:0048589	0.0014744	2.83139	262	1042	87	5407	NMO,SDC,JEB,KUG,KUZ,PKA-C1,TEN-M,HIPK,OCTBETA1R,SNPF,DALLY,CNO,DLG1,NLG2,STAI,SFL,SYP,FUTSCH,PDK1,BRAT,PK,RGN,HR4,RUT,DAP160,CPX,ATPALPHA,SH,TEN-A,DYSC,PUM,ANK2,UNC-104,RAC1,JING,EAG,TOLL-6,CSK,ABL,MOB2,DSCAM1,PAN,DNC,BUN,CADN,TAI,ARM,SGG,PI4KIIIALPHA,CADN2,CAMKII,LIPRIN-ALPHA,RIN,FBGN0285926,CASK,TCTP,RHOGAP100F,PLEXA,LAR,PLUM,CAC,NF1,SLO,RDO,TRIO,SHOT,HNRNP-K,RAB5,ACSL,SYX7,STAU,INR,CHIC,SNPF-R…
GO:BP	regulation of trans-synaptic signaling	GO:0099177	0.00172826	2.76239	90	1042	40	5407	FIFE,CBP53E,THOR,JEB,PKA-C1,RIM,CG3822,MTT,SKY,CG6329,NLG2,SYP,VGLUT,SYT4,TWIT,FRQ2,FRQ1,CPX,PLC21C,SH,DYSC,PUM,ANK2,RAB3,CSK,NLG3,TOMOSYN,GLURIB,CASK,SAP47,CALS,CAC,SLO,KEK6,RL,SRC64B,NFAT,DYS,NLG4,FAS2
GO:BP	modulation of chemical synaptic transmission	GO:0050804	0.00172826	2.76239	90	1042	40	5407	FIFE,CBP53E,THOR,JEB,PKA-C1,RIM,CG3822,MTT,SKY,CG6329,NLG2,SYP,VGLUT,SYT4,TWIT,FRQ2,FRQ1,CPX,PLC21C,SH,DYSC,PUM,ANK2,RAB3,CSK,NLG3,TOMOSYN,GLURIB,CASK,SAP47,CALS,CAC,SLO,KEK6,RL,SRC64B,NFAT,DYS,NLG4,FAS2
GO:BP	regulation of transport	GO:0051049	0.00249737	2.60252	241	1042	81	5407	TIM,RDX,FIFE,SYTBETA,CG9850,IRK1,CG11319,PKA-C1,RIM,SKY,PKC53E,CG43729,CG6329,SYTALPHA,CAM,FBGN0285944,SYT4,BRAT,TWIT,SIK3,SHAB,FRQ2,FRQ1,GLUT1,MOE,CPX,LILLI,NACP60E,SH,CG15537,CG42795,DYSC,UNC-104,RAB3,NORPA,CG32506,ARFGAP1,EAG,COMM,MTOR,ABL,INAC,RGK1,RGK3,PYD,SEC61ALPHA,KLAR,SEC23,SHAW,SGG,TOMOSYN,PDE6,CG1695,TSR,CMPY,IA-2,CAMKII,CASK,SYNGR,PLX,CAC,TRAL,SLO,RAB5,CA-ALPHA1D,SERCA,GISH,SYX7,NEDD4…
GO:BP	circadian behavior	GO:0048512	0.00314866	2.50187	85	1042	38	5407	TIM,VRI,CLK,CRY,PKA-R2,MID1,IRK1,DH44,PKA-C1,DH31,WAKE,CG6329,PDFR,HSP83,DLG1,ITP,TDC2,DAT,SIK3,OAMB,SH,MEF2,DYSC,RAC1,ECR,UNC80,PURA,TYF,DNC,BX,SGG,DOP1R2,GW,NF1,SLO,INR,HR51,RH7
GO:BP	cognition	GO:0050890	0.0032523	2.48781	119	1042	48	5407	PKA-R1,CG11221,DOP1R1,2MIT,SVR,RAD,TBH,HDAC4,PKA-C1,14-3-3ZETA,APPL,TOB,BE,FUTSCH,OAMB,RUT,LILLI,SH,BTK29A,DDC,PUM,ANK2,RAC1,CG4612,ECR,EAG,ABL,RGK1,KLG,MOB2,DNC,ARM,SGG,TOMOSYN,DIKAR,CAMKII,CASK,SAP47,NF1,GALPHAS,GISH,STAT92E,STAU,CRMP,SRC64B,DRL,ARR,FAS2
GO:BP	learning or memory	GO:0007611	0.0032523	2.48781	119	1042	48	5407	PKA-R1,CG11221,DOP1R1,2MIT,SVR,RAD,TBH,HDAC4,PKA-C1,14-3-3ZETA,APPL,TOB,BE,FUTSCH,OAMB,RUT,LILLI,SH,BTK29A,DDC,PUM,ANK2,RAC1,CG4612,ECR,EAG,ABL,RGK1,KLG,MOB2,DNC,ARM,SGG,TOMOSYN,DIKAR,CAMKII,CASK,SAP47,NF1,GALPHAS,GISH,STAT92E,STAU,CRMP,SRC64B,DRL,ARR,FAS2
GO:BP	movement of cell or subcellular component	GO:0006928	0.00335923	2.47376	465	1042	135	5407	MMP2,SDC,NVY,DSCAM4,PKA-R2,CG34353,DSCAM2,DPR11,JEB,SM,CG43737,KUG,VVL,SLI,FBGN0284408,KUZ,PU,TEN-M,FRU,BEAT-IIIC,DALLY,CG44153,STAI,HSC70-4,CAM,SFL,UNC-76,FUTSCH,14-3-3EPSILON,PROS,BRAT,PK,ROBO3,PDM3,UZIP,MOE,BEAT-VI,DSCAM3,PVR,SIDE,TEN-A,DYSC,PUM,UNC-104,MSP300,RAC1,JING,CG13506,MP,ECR,COMM,DIA,CMET,PUC,FAS3,HTS,SOXN,TOLL-6,CSK,ABL,INAC,PKD2,BEAT-IA,BEAT-VB,KLG,GOGO,PPCS,SP2353,BEAT-IC,GUKH,KLA…
GO:BP	purine-containing compound metabolic process	GO:0072521	0.00364926	2.4378	92	1042	40	5407	ALD,AC13E,CG34357,PDE8,CG6767,CG31183,CG43373,PDE11,CG5065,DLG1,ATPSYNCF6,GYC88E,FRQ1,RUT,CG10738,AC78C,PYK,PDE1C,ATPSYND,PGLYM78,PPCS,DNC,ATPSYNG,ENO,PDE6,BLW,PLEXA,COX5B,ACSL,ATPSYNO,ATPSYNGAMMA,ATPSYNF,PGK,TPI,SUN,GAPDH1,CG42637,GAPDH2,ADSS,PGI
GO:BP	transmembrane transport	GO:0055085	0.00529164	2.27641	350	1042	107	5407	NHE2,ANT2,SK,NACHRALPHA6,TRPM,CG5549,MID1,NRV1,IRK1,CG1607,CG11319,CALX,CG43066,NACHRALPHA1,PORIN,CG3822,CG1090,CG43729,CG42260,CG6329,CD98HC,NRV3,CAM,FBGN0285944,VGLUT,CG42817,NCKX30C,ATPSYNCF6,CG8026,DAT,CG1358,HOE1,SHAB,GLUT1,CG8177,NACP60E,ATPALPHA,PLC21C,SH,FER1HCH,ND-MLRQ,VHA16-1,DYSC,SEA,COX6B,PMP70,JP,NORPA,CYPE,CA-ALPHA1T,ATPSYND,EAG,CG1688,BEST1,UNC80,PKD2,RGK1,CG10960,RGK3,CG33233,CG34…
GO:BP	response to abiotic stimulus	GO:0009628	0.00557675	2.25362	241	1042	80	5407	TIM,CLK,DYRK2,CRY,NMO,SDC,DOP1R1,CG34353,EIP93F,HSC70-3,CALX,PKA-C1,HSP23,SLGA,HIPK,PORIN,14-3-3ZETA,BR,DH31,CG14509,EYS,PDFR,APPL,HSP83,DLG1,DRAT,HSC70-4,NRV3,CAM,FBGN0285944,14-3-3EPSILON,GYC88E,CG6330,HR4,RUT,SHEP,ATPALPHA,PLC21C,SH,DDC,CKA,NORPA,CG33129,MTOR,HSP68,INAC,PKD2,GGAMMA30A,GP93,DSCAM1,MSI,DNC,GRP,SHAKB,TCTP,PIS,CAC,NF1,DROJ2,GALPHAS,LOV,MNN1,CERK,GISH,HSP70AA,STAT92E,MUB,GL,INR,SU(…
GO:BP	purine ribonucleotide metabolic process	GO:0009150	0.00572022	2.24259	80	1042	36	5407	ALD,AC13E,CG34357,PDE8,CG31183,CG43373,PDE11,CG5065,DLG1,ATPSYNCF6,GYC88E,RUT,CG10738,AC78C,PYK,PDE1C,ATPSYND,PGLYM78,PPCS,DNC,ATPSYNG,ENO,PDE6,BLW,COX5B,ACSL,ATPSYNO,ATPSYNGAMMA,ATPSYNF,PGK,TPI,SUN,GAPDH1,CG42637,GAPDH2,PGI
GO:BP	regulation of ion transmembrane transport	GO:0034765	0.00582771	2.2345	35	1042	21	5407	IRK1,CG11319,CG43729,CG6329,CAM,FBGN0285944,SHAB,NACP60E,SH,DYSC,EAG,RGK1,RGK3,SEC61ALPHA,SHAW,CAC,SLO,CA-ALPHA1D,SERCA,NEDD4,RGK2
GO:BP	regulation of transmembrane transport	GO:0034762	0.00582771	2.2345	35	1042	21	5407	IRK1,CG11319,CG43729,CG6329,CAM,FBGN0285944,SHAB,NACP60E,SH,DYSC,EAG,RGK1,RGK3,SEC61ALPHA,SHAW,CAC,SLO,CA-ALPHA1D,SERCA,NEDD4,RGK2
GO:BP	animal organ morphogenesis	GO:0009887	0.0107464	1.96874	508	1042	143	5407	DD,VRI,NHE2,CHN,AMON,MMP2,NMO,NVY,RDX,JEB,SVR,APP,CV-2,CG43658,SLI,FBGN0284408,KUZ,PKA-C1,TEN-M,EMC,HIPK,MYPT-75D,FRU,BR,SCA,DALLY,MKP3,CNO,EYS,HSP83,DLG1,CG43921,CAM,SFL,PROS,PK,GCLC,ED,FKBP14,MAM,CG42674,CREBA,MOE,LILLI,ATPALPHA,BTK29A,PVR,STY,DYSC,LIM1,RAC1,JING,NORPA,FLW,ECR,NOC,CG34383,UNK,EIP74EF,DIA,USP8,OVO,PUC,AKAP200,PURA,SDK,LAC,BEAT-IA,PYD,KLG,PPCS,DIF,SP2353,HOOK,KLAR,MOB2,PAN,MSI,CI…
GO:BP	courtship behavior	GO:0007619	0.0147518	1.83116	42	1042	23	5407	FNE,TBH,FRU,DLG1,NLG2,FBGN0285944,PROS,OAMB,RUT,MOE,SHEP,SH,BTK29A,EAG,KTL,DNC,CAMKII,CASK,CAC,SLO,LOV,CORTO,TWZ
GO:BP	regulation of multicellular organismal process	GO:0051239	0.018049	1.74355	512	1042	143	5407	TIM,VRI,CLK,CHN,CRY,NMO,SDC,EIP75B,DOP1R1,CWO,RAD,VVL,PROC,SLI,KUZ,PU,PKA-C1,EMC,HIPK,OCTBETA1R,SNPF,DH31,DALLY,WAKE,PKC53E,CNO,CG6329,PDFR,SPN,HSP83,DLG1,CG43921,SFL,SYP,FUTSCH,PDK1,PROS,BRAT,PK,ED,HR4,OAMB,RUT,ASTC,DAP160,SH,CG15537,PVR,DDC,MEF2,STY,DYSC,PUM,ANK2,UNC-104,RAC1,TER94,NORPA,ECR,EAG,CG34383,UNK,COMM,DIA,PUC,SOXN,CSK,AKAP200,ABL,SDK,PYD,DIF,KLAR,MOB2,DSCAM1,PAN,SEC23,BUN,MSN,CADN,TA…
GO:BP	reproductive behavior	GO:0019098	0.027845	1.55525	71	1042	32	5407	TIM,FNE,TBH,FRU,SIFAR,DLG1,NLG2,FBGN0285944,PROS,TDC2,OAMB,RUT,MOE,SHEP,SH,BTK29A,PDE1C,BOL,EAG,KTL,DNC,CAMKII,CASK,CAC,SLO,LOV,GADD45,INR,CORTO,MBL,TWZ,SPR
GO:BP	rhythmic process	GO:0048511	0.0305009	1.51569	160	1042	57	5407	TIM,PDP1,VRI,CLK,CRY,NVY,CWO,PKA-R2,CG5549,MID1,IRK1,DH44,PKA-C1,EMC,SNPF,DH31,WAKE,EYS,CG6329,PDFR,HSP83,DLG1,14-3-3EPSILON,ITP,TDC2,DAT,SIK3,OAMB,RUT,AC78C,CTRIP,PLC21C,SH,MEF2,DYSC,RAC1,NORPA,FLW,ECR,UNC80,AKAP200,PURA,TYF,DNC,BX,SGG,DOP1R2,GW,WDB,NF1,SLO,GL,INR,NUMB,CG5273,HR51,RH7
GO:BP	ATP metabolic process	GO:0046034	0.0329652	1.48194	95	1042	39	5407	FBGN0284248,ALD,ATPSYNCF6,PYK,ND-MLRQ,ND-15,CYPE,ND-23,ND-B18,ATPSYND,PGLYM78,LEVY,ATPSYNG,ENO,COX7A,BLW,UQCR-C2,COX7C,COX5B,COX5A,UQCR-Q,ATPSYNO,ATPSYNGAMMA,ATPSYNF,ND-13A,COX4,ND-75,PGK,TPI,SUN,GAPDH1,ND-B17.2,RFESP,ND-42,ND-PDSW,ND-20,GAPDH2,ND-39,PGI
GO:BP	ribose phosphate metabolic process	GO:0019693	0.0440664	1.35589	89	1042	37	5407	ALD,AC13E,CG34357,PDE8,CG6767,CG31183,CG43373,PDE11,CG5065,DLG1,ATPSYNCF6,GYC88E,RUT,CG10738,AC78C,PYK,PDE1C,ATPSYND,PGLYM78,PPCS,DNC,ATPSYNG,ENO,PDE6,BLW,COX5B,ACSL,ATPSYNO,ATPSYNGAMMA,ATPSYNF,PGK,TPI,SUN,GAPDH1,CG42637,GAPDH2,PGI
GO:BP	response to oxygen-containing compound	GO:1901700	0.044873	1.34801	212	1042	70	5407	CLK,PKA-R1,EIP75B,DOP1R1,BACC,THOR,PKA-R2,TBH,HDAC4,PKA-C1,PDE8,FASN1,BR,SCA,DLG1,DRAT,CAM,PDK1,GYC88E,MACHR-B,TDC2,HR4,SIK3,OAMB,DPR9,RUT,AC78C,SH,PYK,PVR,DDC,5-HT2B,PUM,CG17734,ECR,EAG,AKAP200,INAC,TRISSINR,KLG,CG32082,GGAMMA30A,HPPY,DNC,BEL,BX,SGG,DOP1R2,CYCG,CASK,WDB,GALPHAS,FTZ-F1,GLYP,STAT92E,CRTC,INR,RL,KTUB,STEP,S,S6K,ND-20,PI3K21B,NUP98-96,MONDO,FAS2,5-HT2A,SIMA,DOCK
GO:BP	circadian rhythm	GO:0007623	0.0463801	1.33367	158	1042	56	5407	TIM,PDP1,VRI,CLK,CRY,NVY,CWO,PKA-R2,CG5549,MID1,IRK1,DH44,PKA-C1,EMC,SNPF,DH31,WAKE,EYS,CG6329,PDFR,HSP83,DLG1,14-3-3EPSILON,ITP,TDC2,DAT,SIK3,OAMB,RUT,AC78C,CTRIP,PLC21C,SH,MEF2,DYSC,RAC1,NORPA,FLW,ECR,UNC80,AKAP200,PURA,TYF,DNC,BX,SGG,DOP1R2,GW,WDB,NF1,SLO,GL,INR,CG5273,HR51,RH7
GO:BP	synapse assembly	GO:0007416	0.0465095	1.33246	143	1042	52	5407	NMO,SDC,FIFE,JEB,TEN-M,OCTBETA1R,SPN,DLG1,NLG2,STAI,SYP,FUTSCH,PDK1,PROS,BRAT,DAP160,CPX,ATPALPHA,TEN-A,DYSC,PUM,ANK2,UNC-104,RAC1,COMM,ABL,MOB2,NLG3,SGG,PI4KIIIALPHA,CAMKII,LIPRIN-ALPHA,FBGN0285926,CASK,RHOGAP100F,LAR,CALS,PLUM,CAC,NF1,SLO,TRIO,ACSL,STAU,NEDD4,SRC64B,S6K,TKV,STAN,DRL,NLG4,FAS2

## Sheet: GO LD daytime cyclers
source	term_name	term_id	adjusted_p_value	negative_log10_of_adjusted_p_value	term_size	query_size	intersection_size	effective_domain_size	intersections
GO:BP	taxis	GO:0042330	4.28544e-08	7.368	140	220	37	2992	CG42637,JEB,JING,BR,KUZ,CADN2,DSCAM2,LOLA,NORPA,IF,ROBO3,S6K,FAS3,SRC64B,SLI,UNC-104,PDM3,DALLY,RDGC,HR51,DIP-GAMMA,HSC70-4,BEAT-IC,DYSC,STAN,NRT,CG44153,TEN-A,NEDD4,HTS,BEAT-IB,LOV,ACSL,COMM,TOLL-6,TRIM9,DSCAM4
GO:BP	axon guidance	GO:0007411	1.18938e-07	6.92468	117	220	33	2992	CG42637,JEB,JING,KUZ,CADN2,DSCAM2,LOLA,IF,ROBO3,S6K,FAS3,SRC64B,SLI,UNC-104,PDM3,DALLY,HR51,DIP-GAMMA,HSC70-4,BEAT-IC,DYSC,STAN,NRT,CG44153,TEN-A,NEDD4,HTS,BEAT-IB,ACSL,COMM,TOLL-6,TRIM9,DSCAM4
GO:BP	cell morphogenesis involved in neuron differentiation	GO:0048667	1.47761e-07	6.83044	182	220	42	2992	CG42637,JEB,JING,BR,KUZ,CADN2,DSCAM2,LOLA,IF,ROBO3,S6K,FAS3,SRC64B,SLI,UNC-104,PDM3,DALLY,SEC23,HR51,TAU,DIP-GAMMA,HSC70-4,FBGN0285937,BEAT-IC,DYSC,STAN,NRT,CG44153,TEN-A,NEDD4,HTS,BEAT-IB,CWO,SICK,FUTSCH,ACSL,ANK2,COMM,TOLL-6,TER94,TRIM9,DSCAM4
GO:BP	cell morphogenesis	GO:0000902	1.68926e-07	6.7723	230	220	48	2992	CG42637,JEB,JING,BR,KUZ,CADN2,DSCAM2,GARZ,LOLA,IF,ROBO3,S6K,FAS3,SRC64B,SLI,UNC-104,PDM3,DALLY,SEC23,MOB2,ARR,HR51,TAU,DIP-GAMMA,HSC70-4,FBGN0285937,BEAT-IC,DYSC,STAN,NRT,CNO,CG44153,TEN-A,SREBP,NEDD4,HTS,BEAT-IB,CWO,SICK,FUTSCH,ACSL,ANK2,COMM,TOLL-6,PPCS,TER94,TRIM9,DSCAM4
GO:BP	multicellular organismal process	GO:0032501	2.44533e-07	6.61166	1084	220	128	2992	KUG,CG42637,OCT-TYRR,FNE,JEB,FBGN0285944,JING,BR,KUZ,CADN2,MBL,DOP1R2,CG11221,CHINMO,SNPF-R,MSP300,AMPH,DSCAM2,GARZ,PCS,SPR,FIFE,PKA-R1,RAD,LOLA,NORPA,CG9850,APP,STAI,IF,EIP74EF,CIC,CG43729,DPR12,ROBO3,VIB,S6K,FAS3,GFRL,SRC64B,CREBB,SLI,CG45057,UNC-104,PDM3,MAMO,HPPY,CG42674,FBGN0284243,FBGN0285926,CG17271,RGK1,ENS,DALLY,SEC23,MOB2,ARR,ELAV,GISH,SERCA,RDGC,HR51,NOT1,EAST,SHAB,TAU,THOR,DIP-GAMMA,H…
GO:BP	plasma membrane bounded cell projection morphogenesis	GO:0120039	2.65814e-07	6.57542	185	220	42	2992	CG42637,JEB,JING,BR,KUZ,CADN2,DSCAM2,LOLA,IF,ROBO3,S6K,FAS3,SRC64B,SLI,UNC-104,PDM3,DALLY,SEC23,HR51,TAU,DIP-GAMMA,HSC70-4,FBGN0285937,BEAT-IC,DYSC,STAN,NRT,CG44153,TEN-A,NEDD4,HTS,BEAT-IB,CWO,SICK,FUTSCH,ACSL,ANK2,COMM,TOLL-6,TER94,TRIM9,DSCAM4
GO:BP	cell projection morphogenesis	GO:0048858	2.65814e-07	6.57542	185	220	42	2992	CG42637,JEB,JING,BR,KUZ,CADN2,DSCAM2,LOLA,IF,ROBO3,S6K,FAS3,SRC64B,SLI,UNC-104,PDM3,DALLY,SEC23,HR51,TAU,DIP-GAMMA,HSC70-4,FBGN0285937,BEAT-IC,DYSC,STAN,NRT,CG44153,TEN-A,NEDD4,HTS,BEAT-IB,CWO,SICK,FUTSCH,ACSL,ANK2,COMM,TOLL-6,TER94,TRIM9,DSCAM4
GO:BP	neuron projection morphogenesis	GO:0048812	2.65814e-07	6.57542	185	220	42	2992	CG42637,JEB,JING,BR,KUZ,CADN2,DSCAM2,LOLA,IF,ROBO3,S6K,FAS3,SRC64B,SLI,UNC-104,PDM3,DALLY,SEC23,HR51,TAU,DIP-GAMMA,HSC70-4,FBGN0285937,BEAT-IC,DYSC,STAN,NRT,CG44153,TEN-A,NEDD4,HTS,BEAT-IB,CWO,SICK,FUTSCH,ACSL,ANK2,COMM,TOLL-6,TER94,TRIM9,DSCAM4
GO:BP	axon development	GO:0061564	2.73682e-07	6.56275	148	220	37	2992	CG42637,JEB,JING,KUZ,CADN2,DSCAM2,LOLA,IF,ROBO3,S6K,FAS3,SRC64B,SLI,UNC-104,PDM3,FBGN0285926,DALLY,HR51,DIP-GAMMA,HSC70-4,BEAT-IC,DYSC,STAN,NRT,CG44153,TEN-A,NEDD4,HTS,BEAT-IB,SICK,FUTSCH,ACSL,ANK2,COMM,TOLL-6,TRIM9,DSCAM4
GO:BP	neuron projection development	GO:0031175	2.89557e-07	6.53827	201	220	44	2992	CG42637,JEB,JING,BR,KUZ,CADN2,DSCAM2,LOLA,STAI,IF,ROBO3,S6K,FAS3,SRC64B,SLI,UNC-104,PDM3,FBGN0285926,DALLY,SEC23,HR51,TAU,DIP-GAMMA,HSC70-4,FBGN0285937,BEAT-IC,DYSC,STAN,NRT,CG44153,TEN-A,NEDD4,HTS,BEAT-IB,CWO,SICK,FUTSCH,ACSL,ANK2,COMM,TOLL-6,TER94,TRIM9,DSCAM4
GO:BP	neuron projection guidance	GO:0097485	3.34399e-07	6.47573	121	220	33	2992	CG42637,JEB,JING,KUZ,CADN2,DSCAM2,LOLA,IF,ROBO3,S6K,FAS3,SRC64B,SLI,UNC-104,PDM3,DALLY,HR51,DIP-GAMMA,HSC70-4,BEAT-IC,DYSC,STAN,NRT,CG44153,TEN-A,NEDD4,HTS,BEAT-IB,ACSL,COMM,TOLL-6,TRIM9,DSCAM4
GO:BP	cell morphogenesis involved in differentiation	GO:0000904	4.06887e-07	6.39053	195	220	43	2992	CG42637,JEB,JING,BR,KUZ,CADN2,DSCAM2,LOLA,IF,ROBO3,S6K,FAS3,SRC64B,SLI,UNC-104,PDM3,DALLY,SEC23,HR51,TAU,DIP-GAMMA,HSC70-4,FBGN0285937,BEAT-IC,DYSC,STAN,NRT,CG44153,TEN-A,NEDD4,HTS,BEAT-IB,CWO,SICK,FUTSCH,ACSL,ANK2,COMM,TOLL-6,PPCS,TER94,TRIM9,DSCAM4
GO:BP	axonogenesis	GO:0007409	4.42579e-07	6.35401	143	220	36	2992	CG42637,JEB,JING,KUZ,CADN2,DSCAM2,LOLA,IF,ROBO3,S6K,FAS3,SRC64B,SLI,UNC-104,PDM3,DALLY,HR51,DIP-GAMMA,HSC70-4,BEAT-IC,DYSC,STAN,NRT,CG44153,TEN-A,NEDD4,HTS,BEAT-IB,SICK,FUTSCH,ACSL,ANK2,COMM,TOLL-6,TRIM9,DSCAM4
GO:BP	neuron development	GO:0048666	6.10118e-07	6.21459	263	220	51	2992	CG42637,JEB,JING,BR,KUZ,CADN2,MBL,CHINMO,AMPH,DSCAM2,LOLA,STAI,IF,DPR12,ROBO3,S6K,FAS3,SRC64B,SLI,UNC-104,PDM3,FBGN0285926,DALLY,SEC23,MOB2,HR51,TAU,DIP-GAMMA,HSC70-4,FBGN0285937,BEAT-IC,DYSC,ESN,STAN,NRT,CG44153,TEN-A,NEDD4,HTS,BEAT-IB,CWO,SICK,PVF3,FUTSCH,ACSL,ANK2,COMM,TOLL-6,TER94,TRIM9,DSCAM4
GO:BP	chemotaxis	GO:0006935	7.02752e-07	6.1532	124	220	33	2992	CG42637,JEB,JING,KUZ,CADN2,DSCAM2,LOLA,IF,ROBO3,S6K,FAS3,SRC64B,SLI,UNC-104,PDM3,DALLY,HR51,DIP-GAMMA,HSC70-4,BEAT-IC,DYSC,STAN,NRT,CG44153,TEN-A,NEDD4,HTS,BEAT-IB,ACSL,COMM,TOLL-6,TRIM9,DSCAM4
GO:BP	response to chemical	GO:0042221	7.10572e-07	6.14839	391	220	65	2992	CG42637,JEB,JING,BR,KUZ,CADN2,EIP93F,DOP1R2,DSCAM2,PKA-R1,RAD,ASTC-R2,LOLA,NORPA,IF,SYTALPHA,ROBO3,S6K,FASN1,FAS3,GSTD1,PYK,SRC64B,CG8745,SLI,UNC-104,SYTBETA,PDM3,HPPY,DALLY,CG32276,GISH,HR51,THOR,DIP-GAMMA,HSC70-4,BEAT-IC,DYSC,STEP,STAN,PUC,NRT,OR45A,CG44153,TEN-A,SREBP,NEDD4,HTS,BEAT-IB,RL,KTUB,TDC2,FUTSCH,RDX,ACSL,MONDO,DH31-R,SCA,COMM,TOLL-6,TER94,TRIM9,PDE8,DSCAM4,SIK3
GO:BP	cell part morphogenesis	GO:0032990	8.2436e-07	6.08388	191	220	42	2992	CG42637,JEB,JING,BR,KUZ,CADN2,DSCAM2,LOLA,IF,ROBO3,S6K,FAS3,SRC64B,SLI,UNC-104,PDM3,DALLY,SEC23,HR51,TAU,DIP-GAMMA,HSC70-4,FBGN0285937,BEAT-IC,DYSC,STAN,NRT,CG44153,TEN-A,NEDD4,HTS,BEAT-IB,CWO,SICK,FUTSCH,ACSL,ANK2,COMM,TOLL-6,TER94,TRIM9,DSCAM4
GO:BP	nervous system development	GO:0007399	8.47108e-07	6.07206	441	220	70	2992	CG42637,JEB,JING,BR,KUZ,CADN2,MBL,CHINMO,AMPH,DSCAM2,FIFE,PKA-R1,LOLA,APP,STAI,IF,DPR12,ROBO3,S6K,FAS3,GFRL,SRC64B,SLI,CG45057,UNC-104,PDM3,FBGN0285926,DALLY,SEC23,MOB2,ARR,ELAV,GISH,HR51,TAU,DIP-GAMMA,HSC70-4,FBGN0285937,BEAT-IC,NKD,DYSC,ESN,STAN,CAMKII,PUC,NRT,CNO,BNB,CG44153,TEN-A,NEDD4,HTS,BEAT-IB,RL,LOV,CWO,FWE,SICK,PVF3,FUTSCH,NUMB,ACSL,SPG,SCA,ANK2,COMM,TOLL-6,TER94,TRIM9,DSCAM4
GO:BP	cellular component morphogenesis	GO:0032989	1.3486e-06	5.87012	226	220	46	2992	CG42637,JEB,JING,BR,KUZ,CADN2,DSCAM2,LOLA,IF,CIC,ROBO3,S6K,FAS3,SRC64B,SLI,UNC-104,PDM3,DALLY,SEC23,HR51,TAU,DIP-GAMMA,HSC70-4,FBGN0285937,BEAT-IC,DYSC,STAN,PUC,NRT,CG44153,TEN-A,NEDD4,HTS,BEAT-IB,RL,CWO,SICK,FUTSCH,ACSL,ANK2,COMM,TOLL-6,PPCS,TER94,TRIM9,DSCAM4
GO:BP	cell differentiation	GO:0030154	1.54059e-06	5.81231	623	220	87	2992	RBP6,KUG,CG42637,JEB,JING,BR,KUZ,CADN2,MBL,CHINMO,MSP300,AMPH,DSCAM2,GARZ,PCS,PKA-R1,LOLA,NORPA,APP,STAI,IF,EIP74EF,CIC,DPR12,ROBO3,S6K,FAS3,PYK,SRC64B,SLI,UNC-104,PDM3,FBGN0285926,ENS,DALLY,SEC23,MOB2,ELAV,GISH,SERCA,HR51,NOT1,TAU,THOR,DIP-GAMMA,HSC70-4,FBGN0285937,BEAT-IC,TPI,NKD,LOST,DYSC,ESN,STAN,PUC,NRT,PGK,CNO,BNB,CG44153,TEN-A,NEDD4,HTS,BEAT-IB,RL,LOV,CWO,FWE,SICK,PVF3,FUTSCH,DREP1,NUMB,AC…
GO:BP	neuron differentiation	GO:0030182	2.50147e-06	5.6018	308	220	55	2992	CG42637,JEB,JING,BR,KUZ,CADN2,MBL,CHINMO,AMPH,DSCAM2,LOLA,APP,STAI,IF,DPR12,ROBO3,S6K,FAS3,SRC64B,SLI,UNC-104,PDM3,FBGN0285926,DALLY,SEC23,MOB2,HR51,TAU,DIP-GAMMA,HSC70-4,FBGN0285937,BEAT-IC,DYSC,ESN,STAN,NRT,CG44153,TEN-A,NEDD4,HTS,BEAT-IB,RL,CWO,FWE,SICK,PVF3,FUTSCH,ACSL,SPG,ANK2,COMM,TOLL-6,TER94,TRIM9,DSCAM4
GO:BP	cellular developmental process	GO:0048869	2.94992e-06	5.53019	630	220	87	2992	RBP6,KUG,CG42637,JEB,JING,BR,KUZ,CADN2,MBL,CHINMO,MSP300,AMPH,DSCAM2,GARZ,PCS,PKA-R1,LOLA,NORPA,APP,STAI,IF,EIP74EF,CIC,DPR12,ROBO3,S6K,FAS3,PYK,SRC64B,SLI,UNC-104,PDM3,FBGN0285926,ENS,DALLY,SEC23,MOB2,ELAV,GISH,SERCA,HR51,NOT1,TAU,THOR,DIP-GAMMA,HSC70-4,FBGN0285937,BEAT-IC,TPI,NKD,LOST,DYSC,ESN,STAN,PUC,NRT,PGK,CNO,BNB,CG44153,TEN-A,NEDD4,HTS,BEAT-IB,RL,LOV,CWO,FWE,SICK,PVF3,FUTSCH,DREP1,NUMB,AC…
GO:BP	neurogenesis	GO:0022008	3.63675e-06	5.43929	357	220	60	2992	CG42637,JEB,JING,BR,KUZ,CADN2,MBL,CHINMO,AMPH,DSCAM2,LOLA,APP,STAI,IF,DPR12,ROBO3,S6K,FAS3,SRC64B,SLI,UNC-104,PDM3,FBGN0285926,DALLY,SEC23,MOB2,GISH,HR51,TAU,DIP-GAMMA,HSC70-4,FBGN0285937,BEAT-IC,NKD,DYSC,ESN,STAN,NRT,CNO,BNB,CG44153,TEN-A,NEDD4,HTS,BEAT-IB,RL,CWO,FWE,SICK,PVF3,FUTSCH,NUMB,ACSL,SPG,ANK2,COMM,TOLL-6,TER94,TRIM9,DSCAM4
GO:BP	plasma membrane bounded cell projection organization	GO:0120036	6.10029e-06	5.21465	244	220	47	2992	KUG,CG42637,JEB,JING,BR,KUZ,CADN2,DSCAM2,LOLA,APP,STAI,IF,ROBO3,S6K,FAS3,SRC64B,SLI,UNC-104,PDM3,FBGN0285926,DALLY,SEC23,HR51,TAU,DIP-GAMMA,HSC70-4,FBGN0285937,BEAT-IC,DYSC,STAN,CAMKII,NRT,CG44153,TEN-A,NEDD4,HTS,BEAT-IB,CWO,SICK,FUTSCH,ACSL,ANK2,COMM,TOLL-6,TER94,TRIM9,DSCAM4
GO:BP	locomotion	GO:0040011	8.22626e-06	5.0848	246	220	47	2992	KUG,CG42637,JEB,JING,BR,KUZ,CADN2,MSP300,DSCAM2,LOLA,NORPA,STAI,IF,ROBO3,S6K,FAS3,SRC64B,SLI,UNC-104,PDM3,DALLY,GISH,RDGC,HR51,DIP-GAMMA,HSC70-4,FBGN0285937,BEAT-IC,DYSC,CERK,STAN,PUC,NRT,CG44153,TEN-A,NEDD4,HTS,BEAT-IB,LOV,PVF3,NUMB,ACSL,COMM,TOLL-6,PPCS,TRIM9,DSCAM4
GO:BP	response to stimulus	GO:0050896	1.17887e-05	4.92853	985	220	116	2992	EIP63F-1,KUG,CG42637,OCT-TYRR,JEB,FBGN0285944,JING,BR,KUZ,CADN2,MBL,RGN,EIP93F,DOP1R2,SNPF-R,MAGI,CG44838,DSCAM2,PK2-R1,GARZ,PCS,SPR,PKA-R1,RAD,ASTC-R2,LOLA,NORPA,CG9850,IF,CG42541,EIP78C,SYTALPHA,CIC,CG43729,ROBO3,S6K,FASN1,FAS3,GSTD1,CG33639,PYK,SRC64B,CREBB,CG8745,SLI,CG42260,UNC-104,SYTBETA,PDM3,CG34384,HPPY,CG42674,XRP1,FBGN0285926,RGK1,DALLY,ARR,CG32276,GISH,RDGC,HR51,THOR,DIP-GAMMA,HSC70-4…
GO:BP	generation of neurons	GO:0048699	2.04566e-05	4.68917	343	220	57	2992	CG42637,JEB,JING,BR,KUZ,CADN2,MBL,CHINMO,AMPH,DSCAM2,LOLA,APP,STAI,IF,DPR12,ROBO3,S6K,FAS3,SRC64B,SLI,UNC-104,PDM3,FBGN0285926,DALLY,SEC23,MOB2,HR51,TAU,DIP-GAMMA,HSC70-4,FBGN0285937,BEAT-IC,NKD,DYSC,ESN,STAN,NRT,CG44153,TEN-A,NEDD4,HTS,BEAT-IB,RL,CWO,FWE,SICK,PVF3,FUTSCH,NUMB,ACSL,SPG,ANK2,COMM,TOLL-6,TER94,TRIM9,DSCAM4
GO:BP	cell projection organization	GO:0030030	2.27268e-05	4.64346	253	220	47	2992	KUG,CG42637,JEB,JING,BR,KUZ,CADN2,DSCAM2,LOLA,APP,STAI,IF,ROBO3,S6K,FAS3,SRC64B,SLI,UNC-104,PDM3,FBGN0285926,DALLY,SEC23,HR51,TAU,DIP-GAMMA,HSC70-4,FBGN0285937,BEAT-IC,DYSC,STAN,CAMKII,NRT,CG44153,TEN-A,NEDD4,HTS,BEAT-IB,CWO,SICK,FUTSCH,ACSL,ANK2,COMM,TOLL-6,TER94,TRIM9,DSCAM4
GO:BP	cell development	GO:0048468	4.59519e-05	4.3377	531	220	75	2992	RBP6,KUG,CG42637,JEB,JING,BR,KUZ,CADN2,MBL,CHINMO,MSP300,AMPH,DSCAM2,GARZ,PCS,PKA-R1,LOLA,NORPA,STAI,IF,EIP74EF,CIC,DPR12,ROBO3,S6K,FAS3,SRC64B,SLI,UNC-104,PDM3,FBGN0285926,ENS,DALLY,SEC23,MOB2,ELAV,GISH,SERCA,HR51,NOT1,TAU,DIP-GAMMA,HSC70-4,FBGN0285937,BEAT-IC,LOST,DYSC,ESN,STAN,PUC,NRT,CG44153,TEN-A,NEDD4,HTS,BEAT-IB,RL,LOV,CWO,SICK,PVF3,FUTSCH,DREP1,NUMB,ACSL,SPG,ANK2,COMM,TOLL-6,PPCS,TER94,WA…
GO:BP	neuron recognition	GO:0008038	4.8382e-05	4.31532	57	220	20	2992	CG42637,DSCAM2,LOLA,IF,DPR12,ROBO3,FAS3,SLI,HSC70-4,BEAT-IC,ESN,STAN,NRT,CG44153,TEN-A,NEDD4,PVF3,COMM,TRIM9,DSCAM4
GO:BP	cell recognition	GO:0008037	4.8382e-05	4.31532	57	220	20	2992	CG42637,DSCAM2,LOLA,IF,DPR12,ROBO3,FAS3,SLI,HSC70-4,BEAT-IC,ESN,STAN,NRT,CG44153,TEN-A,NEDD4,PVF3,COMM,TRIM9,DSCAM4
GO:BP	system development	GO:0048731	5.1977e-05	4.28419	674	220	88	2992	KUG,CG42637,JEB,JING,BR,KUZ,CADN2,MBL,CHINMO,MSP300,AMPH,DSCAM2,GARZ,PCS,FIFE,PKA-R1,LOLA,NORPA,APP,STAI,IF,EIP74EF,CIC,DPR12,ROBO3,S6K,FAS3,GFRL,SRC64B,SLI,CG45057,UNC-104,PDM3,CG42674,FBGN0284243,FBGN0285926,ENS,DALLY,SEC23,MOB2,ARR,ELAV,GISH,HR51,TAU,DIP-GAMMA,HSC70-4,FBGN0285937,BEAT-IC,NKD,DYSC,IRK1,ESN,STEP,STAN,CAMKII,PUC,NRT,CG43921,CNO,BNB,CG44153,TEN-A,NEDD4,HTS,BEAT-IB,RL,LOV,CWO,FWE,S…
GO:BP	regulation of localization	GO:0032879	5.81718e-05	4.23529	225	220	43	2992	FBGN0285944,KUZ,FIFE,LOLA,NORPA,CG9850,SYTALPHA,CG43729,S6K,FASN1,CG42817,SLI,UNC-104,SYTBETA,RGK1,ENS,DALLY,SEC23,GISH,SERCA,HR51,EAST,SHAB,FBGN0285937,SEC61ALPHA,DYSC,IRK1,STEP,STAN,CAMKII,INDY,PUC,CABP1,CNO,NEDD4,GLUT1,PVF3,NUMB,RDX,ACSL,COMM,TER94,SIK3
GO:BP	signaling	GO:0023052	0.000152392	3.81704	676	220	87	2992	EIP63F-1,CG42637,OCT-TYRR,JEB,FBGN0285944,KUZ,DOP1R2,SNPF-R,MAGI,CG44838,PK2-R1,GARZ,PCS,SPR,FIFE,PKA-R1,RAD,ASTC-R2,LOLA,NORPA,CG9850,IF,CG42541,EIP78C,SYTALPHA,CIC,CG43729,S6K,CG33639,SRC64B,SLI,CG42260,UNC-104,SYTBETA,CG34384,HPPY,CG42674,FBGN0285926,RGK1,DALLY,ARR,CG32276,GISH,SERCA,RDGC,SHAB,THOR,HSC70-4,FBGN0285937,NKD,DYSC,CERK,STEP,STAN,CAMKII,PVRAP,PUC,PGK,OR45A,GABA-B-R3,CNO,CG44153,TEN…
GO:BP	cell communication	GO:0007154	0.000204226	3.68989	691	220	88	2992	EIP63F-1,CG42637,OCT-TYRR,JEB,FBGN0285944,KUZ,DOP1R2,SNPF-R,MAGI,CG44838,PK2-R1,GARZ,PCS,SPR,FIFE,PKA-R1,RAD,ASTC-R2,LOLA,NORPA,CG9850,IF,CG42541,EIP78C,SYTALPHA,CIC,CG43729,S6K,CG33639,SRC64B,SLI,CG42260,UNC-104,SYTBETA,PDM3,CG34384,HPPY,CG42674,FBGN0285926,RGK1,DALLY,ARR,CG32276,GISH,SERCA,RDGC,SHAB,THOR,HSC70-4,FBGN0285937,NKD,DYSC,CERK,STEP,STAN,CAMKII,PVRAP,PUC,PGK,OR45A,GABA-B-R3,CNO,CG4415…
GO:BP	developmental process	GO:0032502	0.000269913	3.56878	980	220	112	2992	RBP6,KUG,CG42637,JEB,JING,BR,KUZ,CADN2,MBL,RGN,DOP1R2,CHINMO,SNPF-R,MSP300,AMPH,DSCAM2,GARZ,PCS,FIFE,PKA-R1,LOLA,NORPA,CG9850,APP,STAI,IF,EIP74EF,CIC,DPR12,ROBO3,VIB,S6K,FAS3,GFRL,PYK,SRC64B,SLI,CG45057,UNC-104,PDM3,CG42674,FBGN0284243,FBGN0285926,ENS,DALLY,SEC23,MOB2,ARR,ELAV,GISH,SERCA,HR51,NOT1,EAST,TAU,THOR,DIP-GAMMA,HSC70-4,FBGN0285937,SEC61ALPHA,BEAT-IC,TPI,NKD,LOST,TUDOR-SN,DYSC,IRK1,ESN,S…
GO:BP	anatomical structure development	GO:0048856	0.000631793	3.19943	931	220	107	2992	RBP6,KUG,CG42637,JEB,JING,BR,KUZ,CADN2,MBL,RGN,CHINMO,MSP300,AMPH,DSCAM2,GARZ,PCS,FIFE,PKA-R1,LOLA,NORPA,CG9850,APP,STAI,IF,EIP74EF,CIC,DPR12,ROBO3,S6K,FAS3,GFRL,PYK,SRC64B,SLI,CG45057,UNC-104,PDM3,CG42674,FBGN0284243,FBGN0285926,ENS,DALLY,SEC23,MOB2,ARR,ELAV,GISH,SERCA,HR51,NOT1,EAST,TAU,THOR,DIP-GAMMA,HSC70-4,FBGN0285937,SEC61ALPHA,BEAT-IC,TPI,NKD,LOST,DYSC,IRK1,ESN,STEP,STAN,CAMKII,INDY,PUC,NR…
GO:BP	behavior	GO:0007610	0.000635729	3.19673	182	220	36	2992	FNE,FBGN0285944,MBL,DOP1R2,CG11221,SNPF-R,SPR,KDN,PKA-R1,RAD,NORPA,S6K,SRC64B,CREBB,UNC-104,HPPY,RGK1,MOB2,ARR,GISH,SERCA,HR51,SHAB,DYSC,IRK1,CAMKII,RL,LOV,TDC2,FUTSCH,NUMB,ANK2,TRIM9,TWZ,2MIT,SIK3
GO:BP	regulation of biological quality	GO:0065008	0.000720696	3.14225	477	220	67	2992	FBGN0285944,KUZ,MBL,DOP1R2,CHINMO,BEST1,GARZ,SPR,FIFE,LOLA,NORPA,IF,SYTALPHA,CG43729,S6K,FASN1,PYK,SRC64B,CG45057,UNC-104,SYTBETA,HPPY,VHA16-1,DALLY,SEC23,MOB2,GISH,SERCA,HR51,SHAB,THOR,NDAE1,DIP-GAMMA,HSC70-4,FBGN0285937,TPI,DYSC,IRK1,STAN,CAMKII,INDY,PGK,CABP1,CNO,TEN-A,SREBP,NEDD4,HTS,RL,CG3822,KTUB,GLUT1,FWE,PVF3,FUTSCH,RDX,ACSL,CG33298,MONDO,ANK2,CG10413,PPCS,TER94,VHAAC45,MIB2,TRPM,SIK3
GO:BP	response to external stimulus	GO:0009605	0.000884743	3.05318	338	220	53	2992	KUG,CG42637,JEB,FBGN0285944,JING,BR,KUZ,CADN2,DSCAM2,LOLA,NORPA,IF,ROBO3,S6K,FAS3,SRC64B,SLI,UNC-104,PDM3,FBGN0285926,DALLY,GISH,RDGC,HR51,THOR,DIP-GAMMA,HSC70-4,SEC61ALPHA,BEAT-IC,TPI,DYSC,CERK,STAN,CAMKII,PUC,NRT,CG44153,TEN-A,NEDD4,HTS,BEAT-IB,RL,LOV,KTUB,SICK,ACSL,COMM,TOLL-6,TER94,TRIM9,DSCAM4,CASP,SIK3
GO:BP	movement of cell or subcellular component	GO:0006928	0.00187111	2.7279	269	220	45	2992	KUG,CG42637,JEB,JING,KUZ,CADN2,MSP300,DSCAM2,LOLA,STAI,IF,ROBO3,S6K,FAS3,SRC64B,SLI,UNC-104,PDM3,ENS,DALLY,GISH,HR51,DIP-GAMMA,HSC70-4,FBGN0285937,BEAT-IC,DYSC,CERK,STAN,PUC,NRT,CG44153,TEN-A,NEDD4,HTS,BEAT-IB,PVF3,FUTSCH,NUMB,ACSL,COMM,TOLL-6,PPCS,TRIM9,DSCAM4
GO:BP	anatomical structure morphogenesis	GO:0009653	0.00254716	2.59394	556	220	73	2992	KUG,CG42637,JEB,JING,BR,KUZ,CADN2,MBL,AMPH,DSCAM2,GARZ,PCS,LOLA,NORPA,APP,IF,EIP74EF,CIC,ROBO3,S6K,FAS3,PYK,SRC64B,SLI,UNC-104,PDM3,CG42674,DALLY,SEC23,MOB2,ARR,GISH,HR51,TAU,THOR,DIP-GAMMA,HSC70-4,FBGN0285937,SEC61ALPHA,BEAT-IC,TPI,DYSC,STEP,STAN,PUC,NRT,PGK,CG43921,CNO,CG44153,TEN-A,SREBP,NEDD4,HTS,BEAT-IB,RL,CWO,SICK,FUTSCH,NUMB,RDX,ACSL,SPG,SCA,ANK2,HNRNP-K,COMM,TOLL-6,PPCS,TER94,TRIM9,MIB2,D…
GO:BP	muscle structure development	GO:0061061	0.00324141	2.48927	84	220	22	2992	CG42637,JEB,BR,KUZ,MBL,MSP300,PCS,LOLA,IF,S6K,PYK,FBGN0284243,ENS,SEC23,THOR,TPI,PGK,NEDD4,HTS,NUMB,WAP,MIB2
GO:BP	muscle cell differentiation	GO:0042692	0.0035292	2.45232	41	220	15	2992	JEB,BR,PCS,IF,S6K,PYK,ENS,THOR,TPI,PGK,NEDD4,HTS,NUMB,WAP,MIB2
GO:BP	cell-cell adhesion via plasma-membrane adhesion molecules	GO:0098742	0.00456163	2.34088	22	220	11	2992	KUG,CADN2,DSCAM2,IF,FAS3,BEAT-IC,STAN,CG44153,BEAT-IB,BEAT-VII,DSCAM4
GO:BP	growth	GO:0040007	0.00942931	2.02552	175	220	33	2992	KUG,JEB,JING,KUZ,CADN2,RGN,SNPF-R,STAI,CIC,S6K,SRC64B,CG45057,UNC-104,HPPY,FBGN0285926,DALLY,MOB2,ARR,HR51,THOR,DYSC,STEP,STAN,CAMKII,CNO,TEN-A,FWE,FUTSCH,RDO,ANK2,HNRNP-K,TOLL-6,WAP
GO:BP	system process	GO:0003008	0.0142483	1.84624	161	220	31	2992	OCT-TYRR,FBGN0285944,MBL,CG11221,AMPH,PKA-R1,RAD,NORPA,IF,CG43729,DPR12,ROBO3,SRC64B,CREBB,PDM3,RGK1,MOB2,ARR,GISH,SERCA,RDGC,SHAB,TPI,DYSC,CAMKII,OR45A,KTUB,FUTSCH,ANK2,DPR17,2MIT
GO:BP	signal transduction	GO:0007165	0.018569	1.73121	582	220	73	2992	EIP63F-1,CG42637,OCT-TYRR,JEB,KUZ,DOP1R2,SNPF-R,MAGI,CG44838,PK2-R1,GARZ,PCS,SPR,PKA-R1,RAD,ASTC-R2,LOLA,NORPA,CG9850,IF,CG42541,EIP78C,CIC,CG43729,S6K,CG33639,SRC64B,SLI,CG42260,CG34384,HPPY,CG42674,FBGN0285926,RGK1,DALLY,ARR,CG32276,GISH,RDGC,THOR,FBGN0285937,NKD,CERK,STEP,STAN,PVRAP,PUC,OR45A,GABA-B-R3,CNO,CG44153,SREBP,NEDD4,RL,CG3822,KTUB,CG42788,PVF3,NUMB,RDX,SPG,DH31-R,SCA,ANK2,TOLL-6,TER9…
GO:BP	multicellular organism development	GO:0007275	0.0190203	1.72078	850	220	96	2992	KUG,CG42637,JEB,JING,BR,KUZ,CADN2,MBL,CHINMO,MSP300,AMPH,DSCAM2,GARZ,PCS,FIFE,PKA-R1,LOLA,NORPA,CG9850,APP,STAI,IF,EIP74EF,CIC,DPR12,ROBO3,S6K,FAS3,GFRL,SRC64B,SLI,CG45057,UNC-104,PDM3,CG42674,FBGN0284243,FBGN0285926,ENS,DALLY,SEC23,MOB2,ARR,ELAV,GISH,HR51,EAST,TAU,THOR,DIP-GAMMA,HSC70-4,FBGN0285937,SEC61ALPHA,BEAT-IC,TPI,NKD,LOST,DYSC,IRK1,ESN,STEP,STAN,CAMKII,INDY,PUC,NRT,CG43921,CNO,BNB,CG4415…
GO:BP	chemical homeostasis	GO:0048878	0.0258724	1.58716	101	220	23	2992	DOP1R2,BEST1,NORPA,S6K,FASN1,PYK,HPPY,VHA16-1,SERCA,NDAE1,FBGN0285937,TPI,SREBP,CG3822,KTUB,GLUT1,FWE,MONDO,CG10413,PPCS,VHAAC45,TRPM,SIK3
GO:BP	regulation of transport	GO:0051049	0.0351983	1.45348	134	220	27	2992	FBGN0285944,FIFE,NORPA,CG9850,SYTALPHA,CG43729,CG42817,UNC-104,SYTBETA,RGK1,SEC23,GISH,SERCA,SHAB,FBGN0285937,SEC61ALPHA,DYSC,IRK1,STEP,CAMKII,CABP1,NEDD4,GLUT1,NUMB,RDX,COMM,SIK3
GO:BP	developmental growth	GO:0048589	0.0464205	1.33329	144	220	28	2992	KUG,JEB,JING,KUZ,CADN2,RGN,SNPF-R,STAI,S6K,SRC64B,CG45057,UNC-104,FBGN0285926,DALLY,MOB2,ARR,HR51,DYSC,STEP,STAN,CAMKII,CNO,TEN-A,FUTSCH,RDO,ANK2,HNRNP-K,TOLL-6

## Sheet: GO LD nightime cyclers
source	term_name	term_id	adjusted_p_value	negative_log10_of_adjusted_p_value	term_size	query_size	intersection_size	effective_domain_size	intersections
GO:BP	signaling	GO:0023052	3.47968e-09	8.45846	676	250	107	2992	SYX7,RDX,USP8,CAC,CG3822,PDE8,CG43658,SLI,CG43729,PDFR,RAD,5-HT2B,PKA-R1,SCA,SIK3,PYD,SIFAR,GRP,NOC,CNGB,PURA,PVRAP,CG43373,FKBP14,CG44153,CPO,GGAMMA30A,CA-ALPHA1T,INR,S6KL,DALLY,RH7,SMT3,5-HT2A,PDE1C,WAKE,CCHA1,TKR86C,FAS2,SIMA,MP,PK,PAN,CG13229,NLG3,RAPGAP1,DYS,HR4,DRL,CG10738,CMPY,TTV,DH31-R,PI4KIIIALPHA,ASTC-R2,CG43324,NORPA,ASTA-R1,ANK2,PKA-C3,RGK2,RGK3,FBGN0284408,CSK,OCTBETA3R,NACP60E,TEN-…
GO:BP	cell communication	GO:0007154	1.74132e-08	7.75912	691	250	107	2992	SYX7,RDX,USP8,CAC,CG3822,PDE8,CG43658,SLI,CG43729,PDFR,RAD,5-HT2B,PKA-R1,SCA,SIK3,PYD,SIFAR,GRP,NOC,CNGB,PURA,PVRAP,CG43373,FKBP14,CG44153,CPO,GGAMMA30A,CA-ALPHA1T,INR,S6KL,DALLY,RH7,SMT3,5-HT2A,PDE1C,WAKE,CCHA1,TKR86C,FAS2,SIMA,MP,PK,PAN,CG13229,NLG3,RAPGAP1,DYS,HR4,DRL,CG10738,CMPY,TTV,DH31-R,PI4KIIIALPHA,ASTC-R2,CG43324,NORPA,ASTA-R1,ANK2,PKA-C3,RGK2,RGK3,FBGN0284408,CSK,OCTBETA3R,NACP60E,TEN-…
GO:BP	signal transduction	GO:0007165	7.02402e-07	6.15341	582	250	92	2992	RDX,USP8,CAC,CG3822,PDE8,CG43658,SLI,CG43729,PDFR,RAD,5-HT2B,PKA-R1,SCA,SIK3,PYD,SIFAR,GRP,NOC,CNGB,PURA,PVRAP,CG43373,FKBP14,CG44153,GGAMMA30A,INR,S6KL,DALLY,RH7,SMT3,5-HT2A,PDE1C,WAKE,CCHA1,TKR86C,FAS2,SIMA,MP,PK,PAN,CG13229,RAPGAP1,HR4,DRL,CG10738,CMPY,TTV,DH31-R,PI4KIIIALPHA,ASTC-R2,CG43324,NORPA,ASTA-R1,ANK2,PKA-C3,RGK2,RGK3,FBGN0284408,CSK,OCTBETA3R,JEB,TOLL-6,CG14669,CG42674,SIF,EIP63F-1,W…
GO:BP	response to stimulus	GO:0050896	6.99898e-06	5.15497	985	250	129	2992	SICK,CTRIP,RDX,USP8,RGN,CAC,CG3822,BEL,PDE8,CG43658,SLI,CG43729,PDFR,RAD,5-HT2B,FASN1,PKA-R1,SCA,SIK3,PYD,COMM,DSCAM4,SIFAR,GRP,NOC,CNGB,PURA,PVRAP,CG43373,FKBP14,CG44153,GGAMMA30A,INR,S6KL,DALLY,RH7,SMT3,TDC2,5-HT2A,PDE1C,WAKE,CCHA1,TKR86C,FAS2,NUP98-96,VVL,SIMA,MP,PK,PAN,CG13229,DSCAM3,DIA,RAPGAP1,HR4,DRL,CG10738,CMPY,TTV,DH31-R,BR,PI4KIIIALPHA,ASTC-R2,JING,CG43324,NORPA,ASTA-R1,ANK2,BX,PKA-C3,…
GO:BP	cellular response to stimulus	GO:0051716	2.88476e-05	4.53989	749	250	105	2992	CTRIP,RDX,USP8,RGN,CAC,CG3822,PDE8,CG43658,SLI,CG43729,PDFR,RAD,5-HT2B,FASN1,PKA-R1,SCA,SIK3,PYD,SIFAR,GRP,NOC,CNGB,PURA,PVRAP,CG43373,FKBP14,CG44153,GGAMMA30A,INR,S6KL,DALLY,RH7,SMT3,5-HT2A,PDE1C,WAKE,CCHA1,TKR86C,FAS2,NUP98-96,SIMA,MP,PK,PAN,CG13229,RAPGAP1,HR4,DRL,CG10738,CMPY,TTV,DH31-R,BR,PI4KIIIALPHA,ASTC-R2,CG43324,NORPA,ASTA-R1,ANK2,PKA-C3,RGK2,RGK3,FBGN0284408,CSK,OCTBETA3R,EIP93F,JEB,TO…
GO:BP	G protein-coupled receptor signaling pathway	GO:0007186	0.000110148	3.95802	69	250	23	2992	PDFR,5-HT2B,SIFAR,CG43373,CG44153,GGAMMA30A,RH7,5-HT2A,CCHA1,TKR86C,CG13229,DH31-R,ASTC-R2,CG43324,NORPA,ASTA-R1,OCTBETA3R,CG34384,DOP1R2,CG42450,DGK,RDGA,CG33639
GO:BP	system development	GO:0048731	0.00136924	2.86352	674	250	93	2992	SICK,SYX7,RDX,CWO,USP8,CAC,BEL,TINC,CG43658,SLI,GLCAT-P,PKA-R1,SCA,PYD,COMM,DSCAM4,GRP,CG43921,NOC,IRK1,PURA,FKBP14,CG44153,INR,DALLY,SMT3,NRM,WAKE,FAS2,NUP98-96,VVL,SIMA,MP,PK,PAN,TOY,DSCAM3,NLG3,MDH2,DIA,BUN,DYS,DRL,JV,SDK,TTV,BR,PI4KIIIALPHA,JING,NORPA,ANK2,BX,PKA-C3,FBGN0284408,CSK,DSCAM2,TEN-A,KUG,JEB,FIFE,FBGN0285925,TOLL-6,CG42674,SIF,FBGN0284243,WAP,SELR,VHA26,SIRUP,SCRIB,LAMC,CUL3,ATG1,S…
GO:BP	response to chemical	GO:0042221	0.00197794	2.70379	391	250	63	2992	RDX,BEL,PDE8,SLI,RAD,5-HT2B,FASN1,PKA-R1,SCA,SIK3,COMM,DSCAM4,SIFAR,CG44153,GGAMMA30A,INR,DALLY,SMT3,TDC2,5-HT2A,FAS2,NUP98-96,VVL,SIMA,MP,PK,DSCAM3,HR4,DRL,CMPY,TTV,DH31-R,BR,ASTC-R2,JING,NORPA,BX,FBGN0284408,DSCAM2,NACP60E,TEN-A,EIP93F,JEB,FBGN0285925,TOLL-6,SYTBETA,PYK,SELR,CG8745,SIRUP,SCRIB,DOP1R2,CUL3,ATG1,AB,ALPHA-SPEC,LPIN,CADN2,LOLA,APT,DYSC,SOD2,FUTSCH
GO:BP	axon development	GO:0061564	0.00317475	2.49829	148	250	33	2992	SICK,SLI,COMM,DSCAM4,CG44153,INR,DALLY,SMT3,FAS2,VVL,MP,PK,DSCAM3,DRL,TTV,JING,ANK2,FBGN0284408,DSCAM2,TEN-A,JEB,FBGN0285925,TOLL-6,SIF,SELR,CUL3,AB,ALPHA-SPEC,CADN2,LOLA,FBGN0285926,DYSC,FUTSCH
GO:BP	intracellular signal transduction	GO:0035556	0.00413979	2.38302	259	250	47	2992	RDX,CAC,CG3822,PDE8,CG43658,CG43729,PDFR,RAD,PKA-R1,SIK3,GRP,CNGB,PURA,PVRAP,CG43373,INR,S6KL,SMT3,RAPGAP1,CG10738,PI4KIIIALPHA,NORPA,RGK2,RGK3,CSK,OCTBETA3R,JEB,CG42674,SIF,EIP63F-1,WAP,CG34384,DOP1R2,CG42450,ATG1,DGK,RDGA,PKCDELTA,CANA-14F,CA-BETA,RAB26,LPIN,CG42684,CG3764,CG17528,CG32944,CG34393
GO:BP	axonogenesis	GO:0007409	0.00469879	2.32801	143	250	32	2992	SICK,SLI,COMM,DSCAM4,CG44153,INR,DALLY,SMT3,FAS2,VVL,MP,PK,DSCAM3,DRL,TTV,JING,ANK2,FBGN0284408,DSCAM2,TEN-A,JEB,FBGN0285925,TOLL-6,SIF,SELR,CUL3,AB,ALPHA-SPEC,CADN2,LOLA,DYSC,FUTSCH
GO:BP	multicellular organismal process	GO:0032501	0.00771828	2.11248	1084	250	129	2992	SICK,SYX7,RDX,CWO,TET,USP8,CAC,BEL,TINC,CG43658,SLI,CG43729,GLCAT-P,PDFR,RAD,2MIT,PKA-R1,SCA,SIK3,PYD,COMM,DSCAM4,SIFAR,GRP,CG43921,NOC,IRK1,PURA,DPR17,FKBP14,CG44153,CPO,GGAMMA30A,CA-ALPHA1T,INR,DALLY,DPR3,RH7,SMT3,DPR10,TDC2,NRM,5-HT2A,FBGN0284245,PDE1C,WAKE,FAS2,NUP98-96,VVL,SIMA,MP,PK,PAN,TOY,DSCAM3,NLG3,AG5R2,MDH2,DIA,BUN,DYS,DIKAR,HR4,DRL,DPR15,JV,SDK,TTV,BR,PI4KIIIALPHA,JING,NORPA,ANK2,BX,…
GO:BP	cell junction organization	GO:0034330	0.0112171	1.95012	163	250	34	2992	CAC,PYD,COMM,DPR17,DPR3,DIP-BETA,SMT3,DPR10,FAS2,NLG3,DRL,DPR15,CMPY,DIP-DELTA,PI4KIIIALPHA,ANK2,CSK,TEN-A,JEB,FIFE,SCRIB,ATG1,STAI,CA-BETA,SDT,ALPHA-SPEC,RBP,DPR12,CAMKII,CADN2,CG45057,FBGN0285926,DYSC,FUTSCH
GO:BP	homophilic cell adhesion via plasma membrane adhesion molecules	GO:0007156	0.02765	1.5583	15	250	9	2992	DSCAM4,CG44153,FAS2,DSCAM3,SDK,DSCAM2,KUG,FBGN0285925,CADN2
GO:BP	taxis	GO:0042330	0.0338159	1.47088	140	250	30	2992	SLI,PDFR,COMM,DSCAM4,CG44153,INR,DALLY,FAS2,VVL,MP,PK,DSCAM3,DRL,TTV,BR,JING,NORPA,FBGN0284408,DSCAM2,TEN-A,JEB,FBGN0285925,TOLL-6,SELR,RDGA,AB,ALPHA-SPEC,CADN2,LOLA,DYSC
GO:BP	synapse organization	GO:0050808	0.035865	1.44533	133	250	29	2992	CAC,COMM,DPR17,DPR3,DIP-BETA,SMT3,DPR10,FAS2,NLG3,DRL,DPR15,CMPY,DIP-DELTA,PI4KIIIALPHA,ANK2,TEN-A,JEB,FIFE,ATG1,STAI,CA-BETA,ALPHA-SPEC,RBP,DPR12,CAMKII,CG45057,FBGN0285926,DYSC,FUTSCH

## Sheet: GO all DD cyclers
source	term_name	term_id	adjusted_p_value	negative_log10_of_adjusted_p_value	term_size	query_size	intersection_size	effective_domain_size	intersections
GO:BP	G protein-coupled receptor signaling pathway	GO:0007186	9.07146e-07	6.04232	134	650	49	4694	TBH,DOP1R1,CG32547,PDFR,RUT,PKA-C1,DH31,AC13E,PROC,DH44,SNPF,CG43373,CG44153,CAM,DH31-R,GGAMMA30A,7B2,CG34384,RDGA,DOPECR,CNMA,CG13995,MTT,SIFAR,5-HT1A,NPLP1,OAMB,ASTC,AC78C,CCHA1,CG13229,5-HT2B,GABA-B-R3,INAC,PK2-R1,TRISSINR,ASTA,CG31760,TKR86C,DOP1R2,CG33639,NPF,DOP2R,HUG,DGK,CG18208,CG42450,AC76E,FZ
GO:BP	multicellular organismal process	GO:0032501	2.15639e-06	5.66627	1812	650	327	4694	TIM,VRI,PDP1,TBH,HIS3.3B,FNE,CLK,AMON,NMO,NRV3,ATPALPHA,KIRRE,CWO,CG34353,SM,SIF,OC,TWDLY,SDT,FS(1)H,PKA-R1,CHN,DOP1R1,2MIT,CG15765,HIPK,PDFR,FBGN0284243,RUT,NACHRALPHA3,TACC,MGL,NACHRALPHA6,NVY,DPR13,FIFE,JEB,SVR,ACT5C,CG43658,HDAC4,FBGN0284408,KUZ,PU,PKA-C1,SKY,DH31,MKP3,CG6329,FAX,DPR10,SHEP,BEAT-IA,BUN,CCT1,KLP3A,HTL,AG5R,SCRIB,NHE2,DYRK2,MMP2,CRY,CG11221,WRY,CHRB,RDX,DSCAM4,PKA-R2,RAD,HSC70-…
GO:BP	response to chemical	GO:0042221	2.7433e-06	5.56173	701	650	155	4694	TBH,CLK,ANT2,CG34353,SM,PKA-R1,DOP1R1,DRAT,RUT,NACHRALPHA6,NVY,SYTBETA,JEB,EIP93F,HDAC4,FBGN0284408,KUZ,PKA-C1,BEAT-IA,HTL,SCRIB,DYRK2,MMP2,RDX,DSCAM4,PKA-R2,RAD,HSC70-3,CV-2,DH44,TEN-M,SNPF,PXN,BEAT-IIIC,DALLY,CG44153,CAM,SFL,UNC-76,DH31-R,TDC2,DAT,HR4,DPR9,MOE,NACP60E,PYK,GGAMMA30A,MSI,MSN,BX,SPEN,IDH,LOLA,LPIN,PTP4E,DOPECR,DOR,SDC,EIP75B,BACC,THOR,DSCAM2,DPR11,CG5549,SLI,PDI,NACHRALPHA1,PDE8,1…
GO:BP	cell-cell adhesion	GO:0098609	2.8003e-06	5.5528	92	650	38	4694	KIRRE,CG34353,MKP3,BEAT-IA,SCRIB,DSCAM4,TEN-M,BEAT-IIIC,CG44153,ARM,HBS,RST,DSCAM2,SLI,CAD87A,DLG1,NLG2,ED,BEAT-VI,DSCAM3,TEN-A,SDK,LAC,PYD,BEAT-VB,KLG,BEAT-IC,FBGN0285925,BEAT-IB,DSCAM1,SEC23,CADN,NLG3,CADN2,SEC24CD,EGH,BEAT-VC,FZ
GO:BP	behavior	GO:0007610	3.94774e-06	5.40365	354	650	93	4694	TIM,VRI,TBH,FNE,CLK,AMON,ATPALPHA,SM,OC,PKA-R1,DOP1R1,2MIT,CG14509,PDFR,RUT,SVR,HDAC4,PKA-C1,SLGA,DH31,CG6329,SHEP,SCRIB,DYRK2,CRY,CG11221,PKA-R2,RAD,IRK1,DH44,SNPF,APPL,TOB,TDC2,DAT,DPR9,MOE,LILLI,NACP60E,ARM,BX,DOPECR,BACC,MID1,14-3-3ZETA,MTT,SIFAR,DPR1,WAKE,HSP83,DLG1,NLG2,BE,FBGN0285944,FUTSCH,SIK3,OAMB,PLC21C,SH,BTK29A,DDC,MEF2,DYSC,PUM,PURA,PKD2,RGK1,KLG,HPPY,TYF,MOB2,KTL,DNC,SGG,TOMOSYN,TK…
GO:BP	system process	GO:0003008	1.24838e-05	4.90365	303	650	82	4694	TIM,VRI,TBH,CLK,NRV3,ATPALPHA,KIRRE,SIF,PKA-R1,DOP1R1,2MIT,RUT,NACHRALPHA3,NACHRALPHA6,DPR13,SVR,HDAC4,PKA-C1,DPR10,SCRIB,DYRK2,CRY,CG11221,WRY,RAD,PROC,CALX,CG43729,APPL,CAM,TOB,DPR9,DPR8,LILLI,NACP60E,DPR12,GGAMMA30A,ARM,BX,NACHRALPHA5,RDGA,DOPECR,SDC,DPR11,NACHRALPHA1,14-3-3ZETA,DPR15,DPR1,BE,FBGN0285944,FUTSCH,PDM3,OAMB,DPR3,ASTC,AC78C,SH,BTK29A,CG15537,DDC,DYSC,PUM,INAC,PKD2,RGK1,KLG,ATP8B,M…
GO:BP	response to stimulus	GO:0050896	4.42331e-05	4.35425	1705	650	306	4694	TIM,TBH,CLK,EIP63F-1,NMO,NRV3,ATPALPHA,ANT2,CG34353,SM,SIF,CG14408,PKA-R1,DOP1R1,CG32547,HIPK,CG14509,PDFR,DRAT,RUT,NACHRALPHA3,CG42339,NACHRALPHA6,NVY,PVRAP,CBP53E,SYTBETA,JEB,EIP93F,CG43658,HDAC4,FBGN0284408,KUZ,PKA-C1,HSP23,SLGA,DH31,MKP3,CG6330,SHEP,BEAT-IA,BUN,HTL,SCRIB,HMGZ,DYRK2,MMP2,CRY,WRY,CHRB,RDX,AC13E,DSCAM4,PKA-R2,RAD,HSC70-3,PROC,CV-2,CG34357,CALX,DH44,TEN-M,PORIN,SNPF,CG31183,PXN,B…
GO:BP	neuron differentiation	GO:0030182	4.44554e-05	4.35208	554	650	126	4694	VRI,AMON,CWO,CG34353,SM,SIF,OC,SDT,FS(1)H,CHN,RUT,NVY,JEB,FBGN0284408,KUZ,PKA-C1,SKY,FAX,SHEP,BEAT-IA,BUN,SCRIB,MMP2,DSCAM4,PKA-R2,TEN-M,EMC,BEAT-IIIC,DALLY,EYS,SPN,CG44153,APPL,STAI,CAM,UNC-76,MOE,LILLI,DPR12,MSI,MSN,ARM,SPEN,LOLA,FBGN0285926,TEY,NOS,HBS,PTP4E,CG9705,SDC,DSCAM2,DPR11,CG6959,SLI,RIM,FUR1,SICK,HIG,HSP83,HSC70-4,FUTSCH,ROBO3,ED,PDM3,ESN,UZIP,MAM,BEAT-VI,SH,DSCAM3,SIDE,TEN-A,STY,DYS…
GO:BP	cell-cell adhesion via plasma-membrane adhesion molecules	GO:0098742	4.61834e-05	4.33551	50	650	25	4694	KIRRE,CG34353,BEAT-IA,DSCAM4,BEAT-IIIC,CG44153,HBS,RST,DSCAM2,CAD87A,ED,BEAT-VI,DSCAM3,SDK,LAC,BEAT-VB,KLG,BEAT-IC,FBGN0285925,BEAT-IB,DSCAM1,CADN,CADN2,BEAT-VC,FZ
GO:BP	cell communication	GO:0007154	9.73049e-05	4.01187	1238	650	235	4694	TBH,EIP63F-1,NMO,ATPALPHA,SIF,CG14408,PKA-R1,DOP1R1,CG32547,HIPK,PDFR,RUT,NACHRALPHA3,NACHRALPHA6,FIFE,PVRAP,CBP53E,SYTBETA,JEB,CG43658,HDAC4,FBGN0284408,KUZ,PKA-C1,SKY,DH31,UNC-13-4A,MKP3,CG6329,BUN,HTL,SCRIB,DYRK2,MMP2,CRY,WRY,CHRB,RDX,AC13E,PKA-R2,RAD,HSC70-3,PROC,CV-2,CG34357,CALX,DH44,TEN-M,PORIN,SNPF,CG31183,DALLY,CG43373,PDE11,CG43729,SPN,CG44153,CAM,SFL,TWIT,DH31-R,DAT,HR4,CG42541,FKBP14,…
GO:BP	signaling	GO:0023052	0.000126972	3.89629	1215	650	231	4694	TBH,EIP63F-1,NMO,ATPALPHA,SIF,CG14408,PKA-R1,DOP1R1,CG32547,HIPK,PDFR,RUT,NACHRALPHA3,NACHRALPHA6,FIFE,PVRAP,CBP53E,SYTBETA,JEB,CG43658,HDAC4,FBGN0284408,KUZ,PKA-C1,SKY,DH31,UNC-13-4A,MKP3,CG6329,BUN,HTL,SCRIB,DYRK2,MMP2,CRY,WRY,CHRB,RDX,AC13E,PKA-R2,RAD,HSC70-3,PROC,CV-2,CG34357,CALX,DH44,TEN-M,PORIN,SNPF,CG31183,DALLY,CG43373,PDE11,CG43729,SPN,CG44153,CAM,TOB,SFL,TWIT,DH31-R,DAT,HR4,CG42541,FKB…
GO:BP	nervous system process	GO:0050877	0.0001878	3.7263	251	650	69	4694	TBH,NRV3,ATPALPHA,SIF,PKA-R1,DOP1R1,2MIT,RUT,NACHRALPHA3,NACHRALPHA6,DPR13,SVR,HDAC4,PKA-C1,DPR10,SCRIB,DYRK2,CRY,CG11221,RAD,CALX,APPL,CAM,TOB,DPR9,DPR8,LILLI,NACP60E,DPR12,GGAMMA30A,ARM,NACHRALPHA5,RDGA,DOPECR,SDC,DPR11,NACHRALPHA1,14-3-3ZETA,DPR15,DPR1,BE,FBGN0285944,FUTSCH,PDM3,OAMB,DPR3,AC78C,SH,BTK29A,DDC,DYSC,PUM,INAC,RGK1,KLG,ATP8B,MOB2,DSCAM1,DNC,SGG,TOMOSYN,DIKAR,CAMKII,CENG1A,DOP2R,HIW…
GO:BP	second-messenger-mediated signaling	GO:0019932	0.000231908	3.63468	68	650	29	4694	EIP63F-1,PKA-R1,DOP1R1,PDFR,RUT,PKA-C1,DH31,AC13E,PKA-R2,CG34357,CG31183,CG43373,SPN,CAM,DOPECR,CG42260,NPLP1,CG10738,AC78C,INAC,DNC,CNGB,SGG,DOP1R2,DOP2R,CG18208,CANA-14F,CA-BETA,AC76E
GO:BP	cyclic-nucleotide-mediated signaling	GO:0019935	0.000483142	3.31593	44	650	22	4694	PKA-R1,DOP1R1,PDFR,RUT,PKA-C1,DH31,AC13E,PKA-R2,CG34357,CG31183,CG43373,DOPECR,CG42260,NPLP1,CG10738,AC78C,DNC,CNGB,DOP1R2,DOP2R,CG18208,AC76E
GO:BP	homophilic cell adhesion via plasma membrane adhesion molecules	GO:0007156	0.000497295	3.30339	31	650	18	4694	KIRRE,CG34353,DSCAM4,CG44153,HBS,RST,DSCAM2,CAD87A,ED,DSCAM3,SDK,LAC,KLG,FBGN0285925,DSCAM1,CADN,CADN2,FZ
GO:BP	neurogenesis	GO:0022008	0.00110134	2.95808	629	650	134	4694	VRI,AMON,CWO,CG34353,SM,SIF,OC,SDT,FS(1)H,CHN,RUT,NVY,JEB,FBGN0284408,KUZ,PKA-C1,SKY,FAX,SHEP,BEAT-IA,BUN,HTL,SCRIB,MMP2,DSCAM4,PKA-R2,TEN-M,EMC,BEAT-IIIC,DALLY,EYS,SPN,CG44153,APPL,STAI,CAM,UNC-76,MOE,LILLI,DPR12,MSI,MSN,ARM,SPEN,LOLA,FBGN0285926,TEY,NOS,HBS,PTP4E,CG9705,SDC,DSCAM2,DPR11,CG6959,SLI,RIM,FUR1,WAKE,SICK,HIG,CNO,HSP83,DLG1,HSC70-4,FUTSCH,ROBO3,ED,PDM3,ESN,UZIP,MAM,DAP160,BEAT-VI,SH,…
GO:BP	response to drug	GO:0042493	0.00131329	2.88164	124	650	41	4694	TBH,CLK,ANT2,PKA-R1,DOP1R1,DRAT,RUT,SYTBETA,FBGN0284408,PKA-C1,PKA-R2,CAM,TDC2,DAT,DPR9,GGAMMA30A,BX,DOPECR,BACC,CG5549,PDE8,SYTALPHA,DLG1,OAMB,AC78C,SH,DDC,5-HT2B,PUM,INAC,KLG,HPPY,INDY,DNC,SGG,DOP1R2,CG8745,BEN,DOP2R,PLE,APT
GO:BP	taxis	GO:0042330	0.00147466	2.83131	268	650	70	4694	TIM,NMO,CG34353,SM,DOP1R1,HIPK,PDFR,NVY,JEB,FBGN0284408,KUZ,SLGA,CG6330,SHEP,BEAT-IA,MMP2,CRY,DSCAM4,PKA-R2,TEN-M,BEAT-IIIC,DALLY,CG44153,CAM,UNC-76,MOE,MSN,SPEN,LOLA,RDGA,PTP4E,SDC,DSCAM2,DPR11,SLI,DLG1,HSC70-4,ROBO3,PDM3,UZIP,BEAT-VI,DSCAM3,DDC,SIDE,TEN-A,DYSC,BEAT-VB,KLG,GOGO,SP2353,BEAT-IC,GUKH,FBGN0285925,BEAT-IB,DSCAM1,CADN,TTV,CADN2,POD1,LIPRIN-ALPHA,SELR,LIS-1,PLE,EPHRIN,AB,EGH,ALPHA-SPEC…
GO:BP	axon development	GO:0061564	0.00158178	2.80085	279	650	72	4694	CG34353,SM,SIF,RUT,NVY,JEB,FBGN0284408,KUZ,PKA-C1,FAX,BEAT-IA,MMP2,DSCAM4,PKA-R2,TEN-M,BEAT-IIIC,DALLY,CG44153,CAM,UNC-76,MOE,MSN,SPEN,LOLA,FBGN0285926,PTP4E,SDC,DSCAM2,DPR11,CG6959,SLI,SICK,HSC70-4,FUTSCH,ROBO3,PDM3,UZIP,BEAT-VI,SH,DSCAM3,SIDE,TEN-A,DYSC,BEAT-VB,KLG,GOGO,SP2353,BEAT-IC,GUKH,FBGN0285925,BEAT-IB,DSCAM1,DNC,CADN,TAI,TSR,TTV,CADN2,POD1,LIPRIN-ALPHA,SELR,BEN,LIS-1,EPHRIN,HDC,AB,EGH,C…
GO:BP	cell morphogenesis	GO:0000902	0.00166791	2.77783	428	650	99	4694	ATPALPHA,CWO,CG34353,SM,SIF,OC,FS(1)H,CHN,RUT,NVY,JEB,FBGN0284408,KUZ,FAX,BEAT-IA,HTL,SCRIB,MMP2,DSCAM4,PKA-R2,TEN-M,BEAT-IIIC,DALLY,EYS,CG44153,APPL,CAM,UNC-76,MOE,MSN,ARM,SPEN,LOLA,NOS,PTP4E,CKIALPHA,CG9705,SDC,DSCAM2,DPR11,CG6959,SLI,SICK,CNO,HSC70-4,FUTSCH,ROBO3,ED,PDM3,UZIP,BEAT-VI,SH,DSCAM3,SIDE,TEN-A,DYSC,PUM,PURA,PYD,BEAT-VB,KLG,GOGO,PPCS,SP2353,BEAT-IC,GUKH,FBGN0285925,MOB2,BEAT-IB,DSCAM…
GO:BP	neuron projection development	GO:0031175	0.00243615	2.6133	369	650	88	4694	CWO,CG34353,SM,SIF,OC,FS(1)H,CHN,RUT,NVY,JEB,FBGN0284408,KUZ,PKA-C1,SKY,FAX,BEAT-IA,MMP2,DSCAM4,PKA-R2,TEN-M,BEAT-IIIC,DALLY,SPN,CG44153,APPL,STAI,CAM,UNC-76,MOE,MSN,SPEN,LOLA,FBGN0285926,NOS,PTP4E,CG9705,SDC,DSCAM2,DPR11,CG6959,SLI,SICK,HSC70-4,FUTSCH,ROBO3,PDM3,UZIP,BEAT-VI,SH,DSCAM3,SIDE,TEN-A,DYSC,PUM,PURA,BEAT-VB,KLG,GOGO,SP2353,BEAT-IC,GUKH,FBGN0285925,BEAT-IB,DSCAM1,SEC23,DNC,CADN,TAI,SGG,…
GO:BP	cell projection morphogenesis	GO:0048858	0.0024942	2.60307	347	650	84	4694	CWO,CG34353,SM,SIF,OC,FS(1)H,CHN,RUT,NVY,JEB,FBGN0284408,KUZ,FAX,BEAT-IA,HTL,MMP2,DSCAM4,PKA-R2,TEN-M,BEAT-IIIC,DALLY,CG44153,APPL,CAM,UNC-76,MOE,MSN,SPEN,LOLA,NOS,PTP4E,CG9705,SDC,DSCAM2,DPR11,CG6959,SLI,SICK,HSC70-4,FUTSCH,ROBO3,PDM3,UZIP,BEAT-VI,SH,DSCAM3,SIDE,TEN-A,DYSC,PUM,PURA,BEAT-VB,KLG,GOGO,SP2353,BEAT-IC,GUKH,FBGN0285925,BEAT-IB,DSCAM1,SEC23,DNC,CADN,TAI,TSR,TTV,JIM,CADN2,POD1,LIPRIN-AL…
GO:BP	axonogenesis	GO:0007409	0.00282664	2.54873	272	650	70	4694	CG34353,SM,SIF,RUT,NVY,JEB,FBGN0284408,KUZ,FAX,BEAT-IA,MMP2,DSCAM4,PKA-R2,TEN-M,BEAT-IIIC,DALLY,CG44153,CAM,UNC-76,MOE,MSN,SPEN,LOLA,PTP4E,SDC,DSCAM2,DPR11,CG6959,SLI,SICK,HSC70-4,FUTSCH,ROBO3,PDM3,UZIP,BEAT-VI,SH,DSCAM3,SIDE,TEN-A,DYSC,BEAT-VB,KLG,GOGO,SP2353,BEAT-IC,GUKH,FBGN0285925,BEAT-IB,DSCAM1,DNC,CADN,TAI,TSR,TTV,CADN2,POD1,LIPRIN-ALPHA,SELR,BEN,LIS-1,EPHRIN,HDC,AB,EGH,CUL3,ALPHA-SPEC,ALK,…
GO:BP	generation of neurons	GO:0048699	0.00283305	2.54775	608	650	129	4694	VRI,AMON,CWO,CG34353,SM,SIF,OC,SDT,FS(1)H,CHN,RUT,NVY,JEB,FBGN0284408,KUZ,PKA-C1,SKY,FAX,SHEP,BEAT-IA,BUN,SCRIB,MMP2,DSCAM4,PKA-R2,TEN-M,EMC,BEAT-IIIC,DALLY,EYS,SPN,CG44153,APPL,STAI,CAM,UNC-76,MOE,LILLI,DPR12,MSI,MSN,ARM,SPEN,LOLA,FBGN0285926,TEY,NOS,HBS,PTP4E,CG9705,SDC,DSCAM2,DPR11,CG6959,SLI,RIM,FUR1,WAKE,SICK,HIG,HSP83,DLG1,HSC70-4,FUTSCH,ROBO3,ED,PDM3,ESN,UZIP,MAM,DAP160,BEAT-VI,SH,DSCAM3,S…
GO:BP	anatomical structure morphogenesis	GO:0009653	0.00283327	2.54771	955	650	185	4694	VRI,AMON,NMO,ATPALPHA,KIRRE,CWO,CG34353,SM,SIF,OC,TWDLY,SDT,FS(1)H,BLOT,CHN,HIPK,RUT,TACC,NVY,MSPO,JEB,SVR,ACT5C,CG43658,FBGN0284408,KUZ,PKA-C1,MKP3,FAX,BEAT-IA,BUN,HTL,SCRIB,NHE2,MMP2,CHRB,RDX,DSCAM4,PKA-R2,CV-2,TEN-M,EMC,PORIN,BEAT-IIIC,DALLY,EYS,CG44153,APPL,CAM,SFL,UNC-76,FKBP14,CG42674,MOE,LILLI,PYK,MSI,MSN,ARM,BX,SPEN,LOLA,FRED,NOS,LPIN,HBS,TRH,PTP4E,RST,CKIALPHA,CG9705,SDC,THOR,DSCAM2,DPR1…
GO:BP	neuron development	GO:0048666	0.00302784	2.51887	473	650	106	4694	CWO,CG34353,SM,SIF,OC,SDT,FS(1)H,CHN,RUT,NVY,JEB,FBGN0284408,KUZ,PKA-C1,SKY,FAX,SHEP,BEAT-IA,MMP2,DSCAM4,PKA-R2,TEN-M,BEAT-IIIC,DALLY,EYS,SPN,CG44153,APPL,STAI,CAM,UNC-76,MOE,LILLI,DPR12,MSN,SPEN,LOLA,FBGN0285926,TEY,NOS,PTP4E,CG9705,SDC,DSCAM2,DPR11,CG6959,SLI,RIM,FUR1,SICK,HIG,HSC70-4,FUTSCH,ROBO3,PDM3,ESN,UZIP,BEAT-VI,SH,DSCAM3,SIDE,TEN-A,STY,DYSC,PUM,PURA,BEAT-VB,KLG,GOGO,DIF,SP2353,BEAT-IC,G…
GO:BP	cell part morphogenesis	GO:0032990	0.00306117	2.51411	354	650	85	4694	CWO,CG34353,SM,SIF,OC,FS(1)H,CHN,RUT,NVY,JEB,FBGN0284408,KUZ,FAX,BEAT-IA,HTL,MMP2,DSCAM4,PKA-R2,TEN-M,BEAT-IIIC,DALLY,CG44153,APPL,CAM,UNC-76,MOE,MSN,SPEN,LOLA,NOS,PTP4E,CG9705,SDC,DSCAM2,DPR11,CG6959,SLI,SICK,HSC70-4,FUTSCH,ROBO3,PDM3,UZIP,BEAT-VI,SH,DSCAM3,SIDE,TEN-A,DYSC,PUM,PURA,BEAT-VB,KLG,GOGO,SP2353,BEAT-IC,GUKH,FBGN0285925,BEAT-IB,DSCAM1,SEC23,DNC,CADN,TAI,TSR,TTV,JIM,CADN2,POD1,LIPRIN-AL…
GO:BP	circadian behavior	GO:0048512	0.00560905	2.25111	85	650	31	4694	TIM,VRI,CLK,PDFR,PKA-C1,DH31,CG6329,CRY,PKA-R2,IRK1,DH44,TDC2,DAT,BX,MID1,WAKE,HSP83,DLG1,SIK3,OAMB,SH,MEF2,DYSC,PURA,TYF,DNC,SGG,DOP1R2,GW,NPF,CUL3
GO:BP	nervous system development	GO:0007399	0.00566472	2.24682	774	650	155	4694	VRI,AMON,NMO,ATPALPHA,CWO,CG34353,SM,SIF,OC,SDT,FS(1)H,PKA-R1,CHN,CG15765,RUT,TACC,NVY,FIFE,JEB,FBGN0284408,KUZ,PKA-C1,SKY,FAX,SHEP,BEAT-IA,BUN,HTL,SCRIB,MMP2,DSCAM4,PKA-R2,TEN-M,EMC,BEAT-IIIC,DALLY,EYS,SPN,CG44153,APPL,STAI,CAM,UNC-76,MOE,LILLI,DPR12,MSI,MSN,ARM,SPEN,LOLA,FBGN0285926,TEY,NOS,HBS,PTP4E,CG9705,SDC,DSCAM2,DPR11,CG6959,SLI,RIM,14-3-3ZETA,FUR1,WAKE,SICK,HIG,CNO,HSP83,DLG1,NLG2,HSC70-…
GO:BP	response to external stimulus	GO:0009605	0.00648575	2.18804	586	650	124	4694	TIM,CLK,NMO,NRV3,ATPALPHA,CG34353,SM,DOP1R1,HIPK,CG14509,PDFR,NVY,JEB,HDAC4,FBGN0284408,KUZ,SLGA,CG6330,SHEP,BEAT-IA,HTL,HMGZ,MMP2,CRY,DSCAM4,PKA-R2,CALX,TEN-M,PORIN,SNPF,BEAT-IIIC,DALLY,HMGD,CG44153,CAM,UNC-76,MOE,ALPHATUB84B,GGAMMA30A,MSN,SPEN,LOLA,FBGN0285926,LPIN,RDGA,PTP4E,DOPECR,SDC,EIP75B,THOR,DSCAM2,DPR11,SLI,SICK,DLG1,HSC70-4,ENDOA,FBGN0285944,ROBO3,SIK3,PDM3,OAMB,UZIP,BEAT-VI,PLC21C,SH,…
GO:BP	regulation of biological quality	GO:0065008	0.00673986	2.17135	870	650	170	4694	TIM,TBH,CLK,AMON,NMO,NRV3,ATPALPHA,ANT2,SK,NRV1,SIF,DOP1R1,TRPM,HIPK,CG14509,PDFR,NACHRALPHA3,NACHRALPHA6,FIFE,CBP53E,SYTBETA,SVR,ACT5C,KUZ,SKY,DH31,UNC-13-4A,MKP3,CG8177,BUN,HTL,SCRIB,NHE2,RDX,HSC70-3,PROC,IRK1,DH44,TEN-M,SNPF,DALLY,CG43729,SPN,CAM,TWIT,DAT,FKBP14,FRQ2,FRQ1,MOE,LILLI,NACP60E,PYK,MSN,CG7708,NACHRALPHA5,BLW,LOLA,NOS,LPIN,RDGA,HEX-A,CKIALPHA,CG9705,SDC,EIP75B,ALD,THOR,DPR11,CG5549,…
GO:BP	rhythmic behavior	GO:0007622	0.00764154	2.11682	86	650	31	4694	TIM,VRI,CLK,PDFR,PKA-C1,DH31,CG6329,CRY,PKA-R2,IRK1,DH44,TDC2,DAT,BX,MID1,WAKE,HSP83,DLG1,SIK3,OAMB,SH,MEF2,DYSC,PURA,TYF,DNC,SGG,DOP1R2,GW,NPF,CUL3
GO:BP	plasma membrane bounded cell projection morphogenesis	GO:0120039	0.00869998	2.06048	345	650	82	4694	CWO,CG34353,SM,SIF,OC,FS(1)H,CHN,RUT,NVY,JEB,FBGN0284408,KUZ,FAX,BEAT-IA,MMP2,DSCAM4,PKA-R2,TEN-M,BEAT-IIIC,DALLY,CG44153,APPL,CAM,UNC-76,MOE,MSN,SPEN,LOLA,NOS,PTP4E,CG9705,SDC,DSCAM2,DPR11,CG6959,SLI,SICK,HSC70-4,FUTSCH,ROBO3,PDM3,UZIP,BEAT-VI,SH,DSCAM3,SIDE,TEN-A,DYSC,PUM,PURA,BEAT-VB,KLG,GOGO,SP2353,BEAT-IC,GUKH,FBGN0285925,BEAT-IB,DSCAM1,SEC23,DNC,CADN,TAI,TSR,TTV,JIM,CADN2,POD1,LIPRIN-ALPHA,…
GO:BP	neuron projection morphogenesis	GO:0048812	0.00869998	2.06048	345	650	82	4694	CWO,CG34353,SM,SIF,OC,FS(1)H,CHN,RUT,NVY,JEB,FBGN0284408,KUZ,FAX,BEAT-IA,MMP2,DSCAM4,PKA-R2,TEN-M,BEAT-IIIC,DALLY,CG44153,APPL,CAM,UNC-76,MOE,MSN,SPEN,LOLA,NOS,PTP4E,CG9705,SDC,DSCAM2,DPR11,CG6959,SLI,SICK,HSC70-4,FUTSCH,ROBO3,PDM3,UZIP,BEAT-VI,SH,DSCAM3,SIDE,TEN-A,DYSC,PUM,PURA,BEAT-VB,KLG,GOGO,SP2353,BEAT-IC,GUKH,FBGN0285925,BEAT-IB,DSCAM1,SEC23,DNC,CADN,TAI,TSR,TTV,JIM,CADN2,POD1,LIPRIN-ALPHA,…
GO:BP	system development	GO:0048731	0.0100344	1.99851	1139	650	211	4694	VRI,AMON,NMO,ATPALPHA,KIRRE,CWO,CG34353,SM,SIF,OC,SDT,FS(1)H,PKA-R1,CHN,CG15765,HIPK,FBGN0284243,RUT,TACC,NVY,FIFE,JEB,SVR,CG43658,FBGN0284408,KUZ,PU,PKA-C1,SKY,MKP3,FAX,SHEP,BEAT-IA,BUN,HTL,SCRIB,NHE2,MMP2,RDX,DSCAM4,PKA-R2,CV-2,IRK1,TEN-M,EMC,BEAT-IIIC,DALLY,EYS,SPN,CG44153,APPL,STAI,CAM,SFL,UNC-76,FKBP14,CG42674,MOE,LILLI,DPR12,CG5890,MSI,MSN,ARM,BX,SPEN,IA-2,LOLA,FBGN0285926,FRED,TEY,NOS,LPIN…
GO:BP	cell projection organization	GO:0030030	0.0114153	1.94251	438	650	98	4694	VRI,CWO,CG34353,SM,SIF,OC,FS(1)H,CHN,RUT,NVY,JEB,FBGN0284408,KUZ,PKA-C1,SKY,FAX,BEAT-IA,HTL,SCRIB,MMP2,DSCAM4,PKA-R2,TEN-M,BEAT-IIIC,DALLY,SPN,CG44153,APPL,STAI,CAM,UNC-76,MOE,MSN,SPEN,LOLA,FBGN0285926,NOS,PTP4E,CG9705,SDC,DSCAM2,DPR11,CG6959,SLI,SICK,HSC70-4,FUTSCH,ROBO3,PDM3,UZIP,BEAT-VI,SH,DSCAM3,PVR,SIDE,TEN-A,DYSC,PUM,PURA,BEAT-VB,KLG,GOGO,CG32082,SP2353,BEAT-IC,GUKH,FBGN0285925,BEAT-IB,DSCA…
GO:BP	cation transport	GO:0006812	0.0121457	1.91558	223	650	59	4694	NRV3,ATPALPHA,SK,NRV1,TRPM,NACHRALPHA3,NACHRALPHA6,SYTBETA,CG6329,ATPSYNC,NHE2,IRK1,CG11319,CALX,CG43729,CAM,DAT,NACP60E,ATPSYNG,CG7708,NACHRALPHA5,BLW,ATPSYNBETA,CG5549,MID1,NACHRALPHA1,CG42260,SYTALPHA,CD98HC,FBGN0285944,CG1358,SHAB,DPR3,PLC21C,SH,FER1HCH,ND-MLRQ,VHA16-1,PKD2,RGK1,CG10960,RGK3,INDY,SEC61ALPHA,LEVY,CNGB,SHAW,COX7A,FWE,GLURIB,VHA36-1,ATPSYNB,ATPSYNE,VHA26,CG18769,PROSAP,PMCA,NAPI…
GO:BP	chemical synaptic transmission	GO:0007268	0.0143712	1.84251	224	650	59	4694	ATPALPHA,PKA-R1,DOP1R1,RUT,NACHRALPHA3,NACHRALPHA6,FIFE,CBP53E,SYTBETA,JEB,PKA-C1,SKY,UNC-13-4A,CG6329,TEN-M,TWIT,DAT,FRQ2,FRQ1,NACHRALPHA5,DOPECR,THOR,NACHRALPHA1,RIM,MTT,SYTALPHA,RAB3-GEF,DLG1,NLG2,HSC70-4,SYP,BE,OAMB,CPX,PLC21C,SH,TEN-A,5-HT2B,DYSC,PUM,RPH,DNC,NLG3,TOMOSYN,DOP1R2,ACE,NSYB,GLURIB,CAMKII,ATG1,DOP2R,PROSAP,ALPHA-SPEC,ALK,UNC-13,CA-BETA,RBP,APT,STMA
GO:BP	anterograde trans-synaptic signaling	GO:0098916	0.0143712	1.84251	224	650	59	4694	ATPALPHA,PKA-R1,DOP1R1,RUT,NACHRALPHA3,NACHRALPHA6,FIFE,CBP53E,SYTBETA,JEB,PKA-C1,SKY,UNC-13-4A,CG6329,TEN-M,TWIT,DAT,FRQ2,FRQ1,NACHRALPHA5,DOPECR,THOR,NACHRALPHA1,RIM,MTT,SYTALPHA,RAB3-GEF,DLG1,NLG2,HSC70-4,SYP,BE,OAMB,CPX,PLC21C,SH,TEN-A,5-HT2B,DYSC,PUM,RPH,DNC,NLG3,TOMOSYN,DOP1R2,ACE,NSYB,GLURIB,CAMKII,ATG1,DOP2R,PROSAP,ALPHA-SPEC,ALK,UNC-13,CA-BETA,RBP,APT,STMA
GO:BP	cellular component morphogenesis	GO:0032989	0.0147369	1.83159	481	650	105	4694	ATPALPHA,CWO,CG34353,SM,SIF,OC,FS(1)H,CHN,RUT,NVY,JEB,FBGN0284408,KUZ,FAX,BEAT-IA,BUN,HTL,SCRIB,MMP2,DSCAM4,PKA-R2,TEN-M,EMC,BEAT-IIIC,DALLY,EYS,CG44153,APPL,CAM,UNC-76,MOE,MSN,ARM,SPEN,LOLA,NOS,PTP4E,CKIALPHA,CG9705,SDC,DSCAM2,DPR11,CG6959,SLI,SICK,CNO,HSC70-4,SYP,FUTSCH,ROBO3,ED,PDM3,UZIP,BEAT-VI,SH,DSCAM3,SIDE,TEN-A,DYSC,PUM,PURA,PYD,BEAT-VB,KLG,GOGO,PPCS,SP2353,BEAT-IC,GUKH,FBGN0285925,MOB2,B…
GO:BP	trans-synaptic signaling	GO:0099537	0.0200238	1.69845	226	650	59	4694	ATPALPHA,PKA-R1,DOP1R1,RUT,NACHRALPHA3,NACHRALPHA6,FIFE,CBP53E,SYTBETA,JEB,PKA-C1,SKY,UNC-13-4A,CG6329,TEN-M,TWIT,DAT,FRQ2,FRQ1,NACHRALPHA5,DOPECR,THOR,NACHRALPHA1,RIM,MTT,SYTALPHA,RAB3-GEF,DLG1,NLG2,HSC70-4,SYP,BE,OAMB,CPX,PLC21C,SH,TEN-A,5-HT2B,DYSC,PUM,RPH,DNC,NLG3,TOMOSYN,DOP1R2,ACE,NSYB,GLURIB,CAMKII,ATG1,DOP2R,PROSAP,ALPHA-SPEC,ALK,UNC-13,CA-BETA,RBP,APT,STMA
GO:BP	synaptic signaling	GO:0099536	0.0235801	1.62745	227	650	59	4694	ATPALPHA,PKA-R1,DOP1R1,RUT,NACHRALPHA3,NACHRALPHA6,FIFE,CBP53E,SYTBETA,JEB,PKA-C1,SKY,UNC-13-4A,CG6329,TEN-M,TWIT,DAT,FRQ2,FRQ1,NACHRALPHA5,DOPECR,THOR,NACHRALPHA1,RIM,MTT,SYTALPHA,RAB3-GEF,DLG1,NLG2,HSC70-4,SYP,BE,OAMB,CPX,PLC21C,SH,TEN-A,5-HT2B,DYSC,PUM,RPH,DNC,NLG3,TOMOSYN,DOP1R2,ACE,NSYB,GLURIB,CAMKII,ATG1,DOP2R,PROSAP,ALPHA-SPEC,ALK,UNC-13,CA-BETA,RBP,APT,STMA
GO:BP	cell-cell signaling	GO:0007267	0.0247878	1.60576	353	650	82	4694	NMO,ATPALPHA,PKA-R1,DOP1R1,HIPK,RUT,NACHRALPHA3,NACHRALPHA6,FIFE,CBP53E,SYTBETA,JEB,PKA-C1,SKY,UNC-13-4A,CG6329,DYRK2,MMP2,TEN-M,DALLY,SFL,TWIT,DAT,FRQ2,FRQ1,ARM,SPEN,NACHRALPHA5,DOPECR,CKIALPHA,THOR,NACHRALPHA1,RIM,MTT,SYTALPHA,RAB3-GEF,DLG1,NLG2,HSC70-4,SYP,BE,OAMB,GLUT1,MAM,CPX,PLC21C,SH,CG15537,TEN-A,5-HT2B,DYSC,PUM,RPH,PAN,DNC,NLG3,SGG,TOMOSYN,DOP1R2,SR,ACE,TTV,CMPY,NSYB,GLURIB,CAMKII,NPF,AT…
GO:BP	cell morphogenesis involved in neuron differentiation	GO:0048667	0.0291149	1.53588	343	650	80	4694	CWO,CG34353,SM,SIF,OC,FS(1)H,CHN,RUT,NVY,JEB,FBGN0284408,KUZ,FAX,BEAT-IA,MMP2,DSCAM4,PKA-R2,TEN-M,BEAT-IIIC,DALLY,CG44153,CAM,UNC-76,MOE,MSN,SPEN,LOLA,NOS,PTP4E,CG9705,SDC,DSCAM2,DPR11,CG6959,SLI,SICK,HSC70-4,FUTSCH,ROBO3,PDM3,UZIP,BEAT-VI,SH,DSCAM3,SIDE,TEN-A,DYSC,PUM,BEAT-VB,KLG,GOGO,SP2353,BEAT-IC,GUKH,FBGN0285925,BEAT-IB,DSCAM1,SEC23,DNC,CADN,TAI,TSR,TTV,JIM,CADN2,POD1,LIPRIN-ALPHA,SELR,BEN,L…
GO:BP	neuropeptide signaling pathway	GO:0007218	0.0293821	1.53192	49	650	21	4694	CG32547,PDFR,DH31,PROC,DH44,SNPF,DH31-R,7B2,CG13995,SIFAR,NPLP1,ASTC,CCHA1,CG13229,PK2-R1,TRISSINR,ASTA,TKR86C,CG33639,NPF,HUG
GO:BP	plasma membrane bounded cell projection organization	GO:0120036	0.0300461	1.52221	429	650	95	4694	VRI,CWO,CG34353,SM,SIF,OC,FS(1)H,CHN,RUT,NVY,JEB,FBGN0284408,KUZ,PKA-C1,SKY,FAX,BEAT-IA,SCRIB,MMP2,DSCAM4,PKA-R2,TEN-M,BEAT-IIIC,DALLY,SPN,CG44153,APPL,STAI,CAM,UNC-76,MOE,MSN,SPEN,LOLA,FBGN0285926,NOS,PTP4E,CG9705,SDC,DSCAM2,DPR11,CG6959,SLI,SICK,HSC70-4,FUTSCH,ROBO3,PDM3,UZIP,BEAT-VI,SH,DSCAM3,SIDE,TEN-A,DYSC,PUM,PURA,BEAT-VB,KLG,GOGO,CG32082,SP2353,BEAT-IC,GUKH,FBGN0285925,BEAT-IB,DSCAM1,SEC23…
GO:BP	cognition	GO:0050890	0.0369002	1.43297	119	650	37	4694	TBH,PKA-R1,DOP1R1,2MIT,RUT,SVR,HDAC4,PKA-C1,SCRIB,CG11221,RAD,APPL,TOB,LILLI,ARM,DOPECR,14-3-3ZETA,BE,FUTSCH,OAMB,SH,BTK29A,DDC,PUM,RGK1,KLG,MOB2,DNC,SGG,TOMOSYN,DIKAR,CAMKII,CENG1A,DOP2R,HIW,CG18769,ALK
GO:BP	learning or memory	GO:0007611	0.0369002	1.43297	119	650	37	4694	TBH,PKA-R1,DOP1R1,2MIT,RUT,SVR,HDAC4,PKA-C1,SCRIB,CG11221,RAD,APPL,TOB,LILLI,ARM,DOPECR,14-3-3ZETA,BE,FUTSCH,OAMB,SH,BTK29A,DDC,PUM,RGK1,KLG,MOB2,DNC,SGG,TOMOSYN,DIKAR,CAMKII,CENG1A,DOP2R,HIW,CG18769,ALK
GO:BP	signal transduction	GO:0007165	0.0397425	1.40074	1066	650	197	4694	TBH,EIP63F-1,NMO,SIF,CG14408,PKA-R1,DOP1R1,CG32547,HIPK,PDFR,RUT,NACHRALPHA3,NACHRALPHA6,PVRAP,JEB,CG43658,HDAC4,FBGN0284408,KUZ,PKA-C1,DH31,MKP3,BUN,HTL,SCRIB,DYRK2,MMP2,CRY,WRY,CHRB,RDX,AC13E,PKA-R2,RAD,HSC70-3,PROC,CV-2,CG34357,CALX,DH44,PORIN,SNPF,CG31183,DALLY,CG43373,PDE11,CG43729,SPN,CG44153,CAM,SFL,DH31-R,HR4,CG42541,FKBP14,CG42674,GGAMMA30A,MSN,ARM,BX,SPEN,7B2,CG10289,PDE6,CG34384,NACHRA…
GO:BP	axon guidance	GO:0007411	0.0417979	1.37885	220	650	57	4694	CG34353,SM,NVY,JEB,FBGN0284408,KUZ,BEAT-IA,MMP2,DSCAM4,PKA-R2,TEN-M,BEAT-IIIC,DALLY,CG44153,CAM,UNC-76,MOE,MSN,SPEN,LOLA,PTP4E,SDC,DSCAM2,DPR11,SLI,HSC70-4,ROBO3,PDM3,UZIP,BEAT-VI,DSCAM3,SIDE,TEN-A,DYSC,BEAT-VB,KLG,GOGO,SP2353,BEAT-IC,GUKH,FBGN0285925,BEAT-IB,DSCAM1,CADN,TTV,CADN2,POD1,LIPRIN-ALPHA,SELR,LIS-1,EPHRIN,AB,EGH,ALPHA-SPEC,ALK,BEAT-VC,FZ
GO:BP	cation transmembrane transport	GO:0098655	0.0460534	1.33674	174	650	48	4694	NRV3,ATPALPHA,SK,NRV1,TRPM,CG6329,ATPSYNC,NHE2,IRK1,CG11319,CALX,CG43729,CAM,NACP60E,ATPSYNG,BLW,ATPSYNBETA,CG5549,MID1,NACHRALPHA1,CG42260,CD98HC,FBGN0285944,SHAB,PLC21C,SH,FER1HCH,ND-MLRQ,VHA16-1,PKD2,RGK1,CG10960,RGK3,SEC61ALPHA,LEVY,CNGB,SHAW,COX7A,FWE,VHA36-1,ATPSYNB,ATPSYNE,VHA26,CG18769,PROSAP,PMCA,NAPI-III,CA-BETA

## Sheet: GO DD daytime cyclers
source	term_name	term_id	adjusted_p_value	negative_log10_of_adjusted_p_value	term_size	query_size	intersection_size	effective_domain_size	intersections
GO:BP	system process	GO:0003008	0.00046787	3.32988	309	414	58	4694	ATPALPHA,AC78C,SIF,CRY,CG15537,KLG,CLK,NRV3,SVR,MOB2,SGG,RAD,DNC,DYRK2,PKA-C1,TBH,PROC,WRY,CG11221,NPF,PKA-R1,TOB,DOP1R1,NACHRALPHA5,KIRRE,ATP8B,RUT,CG43729,SCRIB,CENG1A,ROBO3,ASTC,RGK1,GGAMMA30A,DDC,NACHRALPHA3,FBGN0285944,CG18769,PROSAP,RDGA,PKD2,DIKAR,SHAB,VRI,DPR13,ATG1,NACHRALPHA6,TIM,CALX,NACHRALPHA1,FUTSCH,PUM,LILLI,BE,APPL,DPR8,HIW,2MIT

## Sheet: GO DD nightime cyclers
source	term_name	term_id	adjusted_p_value	negative_log10_of_adjusted_p_value	term_size	query_size	intersection_size	effective_domain_size	intersections
GO:BP	behavior	GO:0007610	2.07003e-06	5.68402	356	331	60	4694	MID1,TOMOSYN,TIM,CUL3,DOP1R1,APPL,VRI,SIK3,NLG2,RAD,TDC2,PER,HSP83,DH44,PURA,IRK1,HUG,LILLI,2MIT,TKR86C,PKA-R2,APT,ARM,ALK,DOP2R,MEF2,5-HT1A,PLC21C,SIFAR,CG14509,AMON,PDFR,HDAC4,TUTL,BX,CAMKII,BTK29A,MTT,DYSC,TBH,DOPECR,CG11221,NACP60E,CLK,DOP1R2,SM,SNPF,DLG1,PKA-R1,SHEP,CG6329,DPR1,DPR9,OAMB,ATPALPHA,DYRK2,FNE,14-3-3ZETA,PKA-C1,SH
GO:BP	G protein-coupled receptor signaling pathway	GO:0007186	9.64039e-05	4.01591	135	331	31	4694	DOP1R1,DH31-R,7B2,DH44,HUG,CNMA,CG43373,TKR86C,CG32547,DOP2R,CG44153,5-HT1A,CAM,SIFAR,AMON,PDFR,MTT,TRISSINR,TBH,DOPECR,DGK,DOP1R2,SNPF,CG42450,AC13E,OAMB,CG33639,CCHA1,PKA-C1,INAC,ASTA
GO:BP	response to stimulus	GO:0050896	0.000115535	3.93729	1677	331	169	4694	POD1,SP2353,PDM3,TIM,CUL3,RAB32,LPIN,ALPHA-SPEC,DOP1R1,DH31-R,7B2,CG43729,DSCAM3,THS,DEAF1,WAP,ICS,APPL,DALLY,PYD,DRAT,SIK3,RDX,PXN,SYD,SCHLANK,CG34353,RAD,PDE6,CG31183,ARS2,RAB26,TDC2,PER,HSC70-4,CG3764,SIRUP,CG9005,HSP83,DH44,HMGZ,PURA,HUG,CNMA,EIP63F-1,IDH,CG43373,ENDOA,FKBP14,TOW,TKR86C,CALX,PVRAP,CADN,PKA-R2,DSCAM4,SPEN,APT,DPR11,CBP53E,CG32547,CTRIP,ARM,HRB87F,CG43658,ALK,BEAT-VI,SELR,BEL,H…
GO:BP	cell communication	GO:0007154	0.000262473	3.58092	1203	331	131	4694	SYP,SP2353,PDM3,TOMOSYN,CUL3,RAB32,LPIN,ALPHA-SPEC,DOP1R1,DH31-R,7B2,UNC-13-4A,CG43729,THS,WAP,ICS,DALLY,PYD,SIK3,RDX,SYD,NLG2,SCHLANK,RAD,PDE6,CG31183,RAB26,HSC70-4,CG3764,HSP83,DH44,PURA,HUG,CNMA,EIP63F-1,CG43373,ENDOA,FKBP14,CPO,TOW,TKR86C,CALX,PVRAP,CADN,PKA-R2,SPEN,APT,CBP53E,CG32547,ARM,CG43658,ALK,PKC53E,DOP2R,NACHRALPHA6,CG44153,5-HT1A,PLC21C,CAM,SIFAR,RBP,CNGB,SPN,CG34393,HIPK,AMON,PDFR,…
GO:BP	response to chemical	GO:0042221	0.000287139	3.54191	697	331	88	4694	POD1,SP2353,PDM3,CUL3,LPIN,ALPHA-SPEC,DOP1R1,DH31-R,DSCAM3,THS,DALLY,DRAT,SIK3,RDX,PXN,CG34353,RAD,TDC2,PER,HSC70-4,SIRUP,HSP83,DH44,IDH,CADN,PKA-R2,DSCAM4,SPEN,APT,DPR11,ALK,BEAT-VI,SELR,BEL,DOP2R,NACHRALPHA6,FER1HCH,CG44153,5-HT1A,CAM,SIFAR,HSC70-5,CG8405,PFK,SIDE,BEAT-IA,MTS,HDAC4,TUTL,MSN,BX,TTV,MSI,MTT,DYSC,SDC,TEN-A,TBH,SOD2,DOPECR,NACP60E,CLK,MKP3,DSCAM1,DOP1R2,SM,CADN2,EIP93F,SNPF,MMP2,DL…
GO:BP	multicellular organismal process	GO:0032501	0.000343213	3.46444	1847	331	180	4694	POD1,SYP,SP2353,PDM3,TOMOSYN,TIM,CUL3,LPIN,ALPHA-SPEC,PU,DOP1R1,VEPD,CG43729,DSCAM3,THS,DEAF1,WAP,ICS,APPL,DALLY,PYD,VRI,BVES,SIK3,RDX,CWO,NLG2,YTR,CG34353,RAD,DPR8,TDC2,PER,FAX,HSC70-4,SIRUP,HSP83,CG43921,ACT5C,LARP,MOD(MDG4),PURA,IRK1,HUG,HIG,LILLI,FBGN0285952,FRED,HOOK,2MIT,FKBP14,CPO,TOW,CALX,CADN,PKA-R2,DSCAM4,SPEN,APT,DPR10,DPR3,DPR11,CG15765,NOS,YPS,ARM,HRB87F,CG43658,ALK,BEAT-VI,NEP2,SELR…
GO:BP	inorganic cation transmembrane transport	GO:0098662	0.000437638	3.35888	151	331	32	4694	MID1,SK,CG43729,ATPSYNG,NRV1,IRK1,PMCA,TRPM,CALX,VHA16-1,FER1HCH,PLC21C,SHAW,COX7A,VHA26,CG11319,ATPSYNE,NACP60E,CG7781,BLW,ATPSYNBETA,RGK3,NRV3,LEVY,FWE,CG6329,ATPALPHA,ATPSYNB,ND-MLRQ,NHE2,ATPSYNC,SH
GO:BP	signaling	GO:0023052	0.000469617	3.32826	1176	331	128	4694	SYP,SP2353,TOMOSYN,CUL3,RAB32,LPIN,ALPHA-SPEC,DOP1R1,DH31-R,7B2,UNC-13-4A,CG43729,THS,WAP,ICS,DALLY,PYD,SIK3,RDX,SYD,NLG2,SCHLANK,RAD,PDE6,CG31183,RAB26,HSC70-4,CG3764,HSP83,DH44,PURA,HUG,CNMA,EIP63F-1,CG43373,FKBP14,CPO,TOW,TKR86C,CALX,PVRAP,PKA-R2,SPEN,APT,CBP53E,CG32547,ARM,CG43658,ALK,PKC53E,DOP2R,NACHRALPHA6,CG44153,5-HT1A,PLC21C,CAM,SIFAR,RBP,CNGB,SPN,CG34393,HIPK,AMON,PDFR,MTS,ED,HDAC4,MSN…
GO:BP	circadian behavior	GO:0048512	0.000488969	3.31072	92	331	24	4694	MID1,TIM,CUL3,VRI,SIK3,TDC2,PER,HSP83,DH44,PURA,IRK1,PKA-R2,MEF2,5-HT1A,PDFR,BX,DYSC,CLK,DOP1R2,DLG1,CG6329,OAMB,PKA-C1,SH
GO:BP	rhythmic behavior	GO:0007622	0.000617243	3.20954	93	331	24	4694	MID1,TIM,CUL3,VRI,SIK3,TDC2,PER,HSP83,DH44,PURA,IRK1,PKA-R2,MEF2,5-HT1A,PDFR,BX,DYSC,CLK,DOP1R2,DLG1,CG6329,OAMB,PKA-C1,SH
GO:BP	cation transmembrane transport	GO:0098655	0.00111392	2.95315	173	331	34	4694	MID1,SK,CG43729,ATPSYNG,NRV1,IRK1,PMCA,TRPM,CALX,VHA16-1,FER1HCH,PLC21C,CAM,SHAW,CNGB,COX7A,VHA26,CG11319,ATPSYNE,NACP60E,CG7781,BLW,ATPSYNBETA,RGK3,NRV3,LEVY,FWE,CG6329,ATPALPHA,ATPSYNB,ND-MLRQ,NHE2,ATPSYNC,SH
GO:BP	cell-cell signaling	GO:0007267	0.00119407	2.92297	366	331	55	4694	SYP,TOMOSYN,ALPHA-SPEC,DOP1R1,7B2,UNC-13-4A,DALLY,NLG2,HSC70-4,CPO,SPEN,APT,CBP53E,ARM,ALK,DOP2R,NACHRALPHA6,5-HT1A,PLC21C,RBP,HIPK,MTS,CAMKII,TTV,MTT,DYSC,TEN-A,SOD2,DOPECR,CG7781,PAN,STMA,NLG3,CPX,DOP1R2,MMP2,DOR,UNC-13,SR,DLG1,JEB,PKA-R1,CG6329,SKY,OAMB,NMO,ATPALPHA,CMPY,FIFE,DYRK2,NACHRALPHA5,CG9650,PKA-C1,FRQ1,SH
GO:BP	system process	GO:0003008	0.00135379	2.86845	309	331	49	4694	PDM3,TOMOSYN,TIM,DOP1R1,CG43729,APPL,VRI,RAD,DPR8,PER,LILLI,2MIT,CALX,DPR10,DPR3,DPR11,ARM,ALK,DOP2R,NACHRALPHA6,5-HT1A,CAM,ZIP,HDAC4,BX,CAMKII,BTK29A,DYSC,DPR12,TBH,DOPECR,CG11221,NACP60E,CLK,DPR15,DSCAM1,NRV3,PKA-R1,DPR1,DPR9,OAMB,ATPALPHA,SIF,DYRK2,NACHRALPHA5,14-3-3ZETA,PKA-C1,INAC,SH
GO:BP	chemical synaptic transmission	GO:0007268	0.00153558	2.81373	227	331	40	4694	SYP,TOMOSYN,ALPHA-SPEC,DOP1R1,UNC-13-4A,NLG2,HSC70-4,CPO,APT,CBP53E,ALK,DOP2R,NACHRALPHA6,5-HT1A,PLC21C,RBP,CAMKII,MTT,DYSC,TEN-A,SOD2,DOPECR,CG7781,STMA,NLG3,CPX,DOP1R2,UNC-13,DLG1,JEB,PKA-R1,CG6329,SKY,OAMB,ATPALPHA,FIFE,NACHRALPHA5,PKA-C1,FRQ1,SH
GO:BP	anterograde trans-synaptic signaling	GO:0098916	0.00153558	2.81373	227	331	40	4694	SYP,TOMOSYN,ALPHA-SPEC,DOP1R1,UNC-13-4A,NLG2,HSC70-4,CPO,APT,CBP53E,ALK,DOP2R,NACHRALPHA6,5-HT1A,PLC21C,RBP,CAMKII,MTT,DYSC,TEN-A,SOD2,DOPECR,CG7781,STMA,NLG3,CPX,DOP1R2,UNC-13,DLG1,JEB,PKA-R1,CG6329,SKY,OAMB,ATPALPHA,FIFE,NACHRALPHA5,PKA-C1,FRQ1,SH
GO:BP	nervous system process	GO:0050877	0.00193379	2.71359	256	331	43	4694	PDM3,TOMOSYN,DOP1R1,APPL,RAD,DPR8,PER,LILLI,2MIT,CALX,DPR10,DPR3,DPR11,ARM,ALK,DOP2R,NACHRALPHA6,5-HT1A,CAM,HDAC4,CAMKII,BTK29A,DYSC,DPR12,TBH,DOPECR,CG11221,NACP60E,DPR15,DSCAM1,NRV3,PKA-R1,DPR1,DPR9,OAMB,ATPALPHA,SIF,DYRK2,NACHRALPHA5,14-3-3ZETA,PKA-C1,INAC,SH
GO:BP	trans-synaptic signaling	GO:0099537	0.00198192	2.70291	229	331	40	4694	SYP,TOMOSYN,ALPHA-SPEC,DOP1R1,UNC-13-4A,NLG2,HSC70-4,CPO,APT,CBP53E,ALK,DOP2R,NACHRALPHA6,5-HT1A,PLC21C,RBP,CAMKII,MTT,DYSC,TEN-A,SOD2,DOPECR,CG7781,STMA,NLG3,CPX,DOP1R2,UNC-13,DLG1,JEB,PKA-R1,CG6329,SKY,OAMB,ATPALPHA,FIFE,NACHRALPHA5,PKA-C1,FRQ1,SH
GO:BP	synaptic signaling	GO:0099536	0.00288595	2.53971	232	331	40	4694	SYP,TOMOSYN,ALPHA-SPEC,DOP1R1,UNC-13-4A,NLG2,HSC70-4,CPO,APT,CBP53E,ALK,DOP2R,NACHRALPHA6,5-HT1A,PLC21C,RBP,CAMKII,MTT,DYSC,TEN-A,SOD2,DOPECR,CG7781,STMA,NLG3,CPX,DOP1R2,UNC-13,DLG1,JEB,PKA-R1,CG6329,SKY,OAMB,ATPALPHA,FIFE,NACHRALPHA5,PKA-C1,FRQ1,SH
GO:BP	inorganic ion transmembrane transport	GO:0098660	0.00743595	2.12866	169	331	32	4694	MID1,SK,CG43729,ATPSYNG,NRV1,IRK1,PMCA,TRPM,CALX,VHA16-1,FER1HCH,PLC21C,SHAW,COX7A,VHA26,CG11319,ATPSYNE,NACP60E,CG7781,BLW,ATPSYNBETA,RGK3,NRV3,LEVY,FWE,CG6329,ATPALPHA,ATPSYNB,ND-MLRQ,NHE2,ATPSYNC,SH
GO:BP	ion transmembrane transport	GO:0034220	0.024382	1.61293	241	331	39	4694	MID1,SK,CG43729,ATPSYNG,CG8177,NRV1,IRK1,PMCA,TRPM,CALX,VHA16-1,NACHRALPHA6,FER1HCH,PLC21C,CAM,SHAW,CNGB,COX7A,VHA26,DYSC,CG11319,ATPSYNE,NACP60E,CG7781,BLW,ATPSYNBETA,RGK3,NRV3,CG9413,LEVY,FWE,CG6329,ATPALPHA,ATPSYNB,ND-MLRQ,NHE2,NACHRALPHA5,ATPSYNC,SH
GO:BP	regulation of biological quality	GO:0065008	0.0265073	1.57663	871	331	97	4694	SYP,SP2353,MID1,TOMOSYN,TIM,RAB32,SK,LPIN,ALPHA-SPEC,DOP1R1,7B2,UNC-13-4A,CG43729,CG8177,DALLY,PYD,SIK3,RDX,NLG2,PER,HSC70-4,HSP83,DH44,ACT5C,NRV1,IRK1,LILLI,PMCA,TRPM,ENDOA,FKBP14,CADN,VHA16-1,DPR11,CBP53E,HEX-A,NOS,ARM,ALK,NACHRALPHA6,MEF2,FER1HCH,PLC21C,CAM,ZIP,CG14509,HSC70-5,SPN,TSR,PFK,HIPK,AMON,PDFR,ED,MSN,CAMKII,BTK29A,CG10738,DYSC,SDC,TEN-A,CG45057,TBH,LAMC,SOD2,NACP60E,BUN,CLK,BLW,MKP3,…
GO:BP	circadian rhythm	GO:0007623	0.032376	1.48978	171	331	31	4694	MID1,PDP1,TIM,CUL3,VRI,SIK3,CWO,TDC2,PER,HSP83,DH44,PURA,IRK1,PKA-R2,CTRIP,MEF2,5-HT1A,PLC21C,PDFR,MTS,BX,DYSC,EYS,CLK,DOP1R2,SNPF,DLG1,CG6329,OAMB,PKA-C1,SH
GO:BP	cation transport	GO:0006812	0.0326751	1.48578	225	331	37	4694	MID1,SK,CG43729,ATPSYNG,NRV1,IRK1,PMCA,TRPM,CALX,VHA16-1,DPR3,NACHRALPHA6,FER1HCH,PLC21C,CAM,SHAW,CNGB,COX7A,VHA26,CG11319,ATPSYNE,NACP60E,CG7781,BLW,ATPSYNBETA,RGK3,NRV3,LEVY,FWE,CG6329,ATPALPHA,ATPSYNB,ND-MLRQ,NHE2,NACHRALPHA5,ATPSYNC,SH
GO:BP	monovalent inorganic cation transport	GO:0015672	0.033261	1.47806	113	331	24	4694	SK,ATPSYNG,NRV1,IRK1,CALX,VHA16-1,SHAW,COX7A,VHA26,CG11319,ATPSYNE,NACP60E,CG7781,BLW,ATPSYNBETA,NRV3,LEVY,CG6329,ATPALPHA,ATPSYNB,ND-MLRQ,NHE2,ATPSYNC,SH
GO:BP	second-messenger-mediated signaling	GO:0019932	0.0365997	1.43652	69	331	18	4694	DOP1R1,CG31183,EIP63F-1,CG43373,PKA-R2,DOP2R,CAM,CNGB,SPN,PDFR,CG10738,DOPECR,DOP1R2,PKA-R1,AC13E,CG34357,PKA-C1,INAC
GO:BP	rhythmic process	GO:0048511	0.0481091	1.31777	174	331	31	4694	MID1,PDP1,TIM,CUL3,VRI,SIK3,CWO,TDC2,PER,HSP83,DH44,PURA,IRK1,PKA-R2,CTRIP,MEF2,5-HT1A,PLC21C,PDFR,MTS,BX,DYSC,EYS,CLK,DOP1R2,SNPF,DLG1,CG6329,OAMB,PKA-C1,SH
